# Supplementary material for: Feedback inhibition underlies new computational functions of cerebellar interneurons
Source: eLife. 2022 Dec 8;11:e77603. doi: 10.7554/eLife.77603 (PMC9771357; doi:10.7554/eLife.77603)
Supplement: Figure 1—source data 1. — MLIs, molecular layer interneurons; PCs, Purkinje cells. [file elife-77603-fig1-data1.xlsx]

## Sheet: Figure1c
		Normalized action potential frequency
	Time (s)	cell 1	cell 2	cell 3	cell 4		mean		SD	SEM
	-0.3	0.981217	1.04727	1.00907	1.03459		1.01804		0.0292378	0.0146189
	-0.25	0.990263	0.785612	0.818293	1.0033		0.899367		0.113398	0.056699
	-0.2	1.01057	0.958292	0.926664	0.939122		0.958662		0.0369696	0.0184848
	-0.15	1.02277	0.835118	0.971969	0.81341		0.910816		0.102454	0.0512271
	-0.1	0.99394	0.850091	0.865667	0.934942		0.91116		0.0663756	0.0331878
	-0.05	0.982791	0.859839	0.719385	0.922764		0.871195		0.112972	0.0564862
	0	0.982943	0.819856	0.869769	0.930762		0.900833		0.0710869	0.0355435
	0.05	0.11495	0	0	0		0.0287375		0.057475	0.0287375
	0.1	0.615867	0	0	0.066187		0.170514		0.298537	0.149269
	0.15	0.859202	0.613804	0.466159	0.582116		0.63032		0.16526	0.0826298
	0.2	0.921771	0.956032	1.01737	0.792049		0.921806		0.0951163	0.0475582
	0.25	0.956349	0.839468	0.925528	0.800463		0.880452		0.0727327	0.0363663
	0.3	0.904366	0.793452	0.866448	0.872816		0.859271		0.0469066	0.0234533
	0.35	0.976864	0.82939	0.782714	0.830654		0.854905		0.0843103	0.0421551
	0.4	0.89183	0.814477	0.638056	0.713377		0.764435		0.111523	0.0557616
	0.45	0.909986	0.531506	0.899226	0.784258		0.781244		0.175947	0.0879737
	0.5	0.936263	0.773739	0.614173	0.816871		0.785261		0.133172	0.0665862

## Sheet: Figure 1e
Distribution of IPSC latencies (ms)
	1.15
	1.35
	1
	0.95
	0.85
	1.15
	1.15
	0.93
	1.35
	0.95
	1.05
	0.85
	1.05
	1.2
	1.1
	0.8
	1
	1.2
	0.77
	0.94
	1.1
	0.9
	0.95
	0.9
	1.05
	1
	1.05
	0.95
	0.95
	0.9
	1
	0.95
	1
	1
	1
	1.05
	1.05
	1.2
	1
	1.05
	1.65
	1.55
	1.55
	1.6
	1.6
	1.8
	1.65
	1.75
	1.65
	1.7
	1.45
	1.45
	0.7
	1.4
	1.8
	1.35
	1.75
	1.5
	1.55
	1.7
	1.1
	1.3
	0.85
	1.15
	0.95
	1.1
	0.95
	1.3
	1.15
	0.75
	1.1
	1
	1.1
	1.15
	0.8
	1.3
	0.95
	1.05
	1.05
	0.95
	1
	1.1
	1.7
	1.3
	1.8
	1.1
	1
	1.1
	1.5
	1
	1
	1.5
	1
	1.1
	1.1
	1.2
	1.5
	1
	0.9
	1.2
	1
	1
	1.2
	1.05
	1
	0.95
	1
	1.05
	0.95
	1.1
	0.9
	0.9
	1
	0.9
	1.1
	1.2
	0.7
	0.9
	0.7
	1.1
	1
	1.4
	1.1
	1.4
	1.7
	1.3
	1
	1.8
	1.1
	1.2
	1
	1.1
	1.5
	1
	1.2
	1
	0.9
	1
	1.1
	1.5
average	1.151
SD	0.267069
SEM	0.0225714

## Sheet: Figure 1f
Distribution of amplitudes of spontaneous (blue) and evoked (red) IPSCs in PC-MLIs.
	spontanous IPSCs		evoked IPSCs
	amplitude (pA)
	14.2099		79.6861
	14.1272		78.0001
	18.3424		73.5118
	21.3524		65.9853
	10.7373		57.6052
	10.7644		58.6463
	16.4816		63.6245
	22.1182		61.3786
	15.4567		62.4295
	11.2501		69.8858
	12.4293		33.7268
	15.0721		56.6526
	20.137		65.9039
	12.1575		32.0791
	10.5467		39.668
	13.334		47.7265
	14.4192		60.9929
	29.2725		50.607
	22.3297		64.4357
	43.4868		62.7653
	11.4442		69.9531
	14.6184		66.8811
	10.0295		52.698
	11.7054		44.6286
	14.6286		58.2738
	13.0384		28.8002
	11.1815		24.9501
	16.7479		47.0271
	20.2045		70.9039
	30.6573		52.4971
	34.8427		33.7689
	16.936		48.8275
	14.1386		56.0144
	14.7745		39.8535
	14.0015		47.1155
	16.5945		46.6615
	14.6594		16.999
	11.6736		56.1659
	16.2822		39.9651
	16.2618		21.0917
	12.6534		40.4548
	13.0263		46.5426
	15.6509		30.7381
	11.478		42.8872
	11.2793		47.5906
	32.404		38.0515
	13.7209		46.761
	12.8587		49.5667
	12.6333		51.7862
	31.3413		42.6335
	20.2725		20.0868
	12.0497		41.735
	25.0896		24.4282
	12.7484		27.2464
	12.1602		59.7115
	14.3723		47.9402
	16.2389		52.1137
	14.3983		33.7434
	17.6622		41.7736
	11.7027		40.9697
	19.5011		34.664
	29.1857		40.0945
	16.3103		22.0379
	12.3198		44.9009
	12.3289		39.4176
	20.1473		41.9956
	11.5719		52.6837
	25.6733		31.3822
	16.692		34.3286
	16.2376		26.2919
	15.2376		64.823
	16.3356		30.0478
	16.4259		32.5481
	16.0866		50.4606
	13.8586		38.1704
	18.9429		38.7403
	24.9851		38.7992
	21.5956		39.168
	16.7132		27.9373
	23.0605		51.6378
	13.3551		48.5109
	13.1903		51.9366
	10.4825		24.4156
	10.26		44.1733
	10.5928		35.2499
	14.1519		31.2842
	14.5473		38.6516
	12.1538		40.4982
	14.0581		46.8912
	17.8786		15.091
	10.9268		40.5346
	12.5243		31.0078
	13.8456		55.8461
	14.5102		31.3132
	23.0379		34.8596
	12.9027		25.3441
	25.3572		55.1294
	11.7933		59.2669
	12.33		59.6546
	15.4323		70.9791
	10.8428		44.9293
	13.9156		81.6353
	13.1911		53.2915
	13.5542		44.7694
	12.8899		40.0448
	19.2926		58.0566
	12.201		64.7506
	11.4183		58.084
	25.5166		44.9886
	10.5793		68.3014
	13.9194		47.5204
	24.2074		55.0487
	12.2548		59.9184
	14.8793		40.292
	33.6886		63.9391
	29.1627		60.2715
	15.4893		54.9724
	12.4655		42.1333
	14.1982		39.6684
	11.2393		60.995
	15.0313		38.5922
	17.6262		62.0026
	13.68		44.393
	20.5591		21.0451
	21.1923		65.6574
	18.3744		61.438
	14.3859		40.6527
	11.1679		42.5002
	23.1017		33.1674
	15.2114		46.4136
	14.2956		44.1054
	16.5994		44.1118
	10.0752		47.5353
	22.997		53.1242
	17.4846		61.2175
	17.2654		37.7542
	15.8133		60.8788
	22.0705		73.4235
	14.1708		16.9693
	15.0531		45.1097
	10.8944		35.0812
	20.4523		40.4879
	14.4874		51.2515
	13.4768		51.9144
	15.984		48.9164
	10.3561		36.1538
	11.7805		29.6291
	12.6218		69.1521
	14.7001		50.2033
	12.1463		47.8331
	22.1915		49.7743
	14.076		53.7416
	21.1123		34.6292
	17.2395		49.801
	14.8758		28.4741
	18.1149		29.1609
	12.38		30.5005
	13.4387		36.4798
	20.4458		19.8877
	11.9285		58.6063
	16.1094		38.8778
	13.834		48.8011
	21.5768		53.3721
	13.3387		46.8676
	15.8226		25.6791
	14.419		16.4902
	16.5826		12.4924
	14.9941		35.2391
	12.3727		61.2666
	15.7589		33.1917
	12.5713		36.1949
	13.8635		46.8325
	18.8636		35.8071
	15.4517		36.3701
	16.8956		23.3756
	17.5985		31.0163
	10.6336		31.7346
	13.7713		23.5645
	26.7035		19.3742
	12.9919		41.1144
	13.8324		51.8416
	13.5518		54.1348
	12.3595		40.5719
	15.3305		27.3387
	12.2344		20.5972
	12.2405		15.7788
	10.3481		25.6274
	13.7298		56.1033
	16.8156		13.1897
	12.4433		36.9669
	16.6532		21.3023
	18.3903		52.519
	10.0602		43.782
	14.3724		36.8836
	37.397		37.8424
	12.1438		41.4829
	21.5759		50.926
	13.7373		49.6248
	11.8441
	13.5709
	13.2038
	37.5587
	18.3564
	33.2069
	14.9133
	24.1348
	12.0053
	20.0451
	10.4648
	16.1136
	11.1757
	18.3868
	20.9079
	12.3362
	11.4097
	17.0358
	13.3477
	40.4796
	14.7983
	31.6999
	33.0742
	16.4999
	10.8565
	18.0822
	11.2636
	17.9307
	10.0241
	38.8179
	10.9299
	13.0499
	19.6036
	26.0558
	12.0952
	20.793
	12.9593
	19.8683
	33.0183
	12.9673
	10.8553
	15.8279
	20.0233
	13.5569
	24.0711
	10.0844
	12.9446
	15.7208
	10.2849
	10.8627
	20.7295
	14.7758
	36.655
	36.6312
	26.6335
	20.2312
	15.2248
	11.586
	39.4115
	37.2067
	18.7957
	31.7346
	13.1773
	12.7777
	26.7324
	16.9789
	11.508
	13.4911
	23.4143
	32.9472
	11.1902
	31.5069
	12.2272
	13.3605
	12.5519
	10.9709
	17.8211
	12.2113
	10.2686
	14.0878
	12.3784
	16.3562
	16.4577
	15.6062
	33.9303
	17.7604
	31.5076
	12.4352
	12.5391
	21.0561
	12.9676
	38.0067
	32.9347
	15.1544
	12.9545
	33.11
	30.9262
	19.357
	13.8159
	11.7492
	10.646
	11.8108
	15.4022
	26.0541
	33.6992
	11.5907
	10.5975
	13.5612
	20.0296
	14.2409
	11.739
	26.0338
	12.7155
	22.4411
	14.2588
	14.1608
	12.6401
	10.4096
	13.6675
	10.5594
	12.928
	13.046
	16.1291
	14.9514
	15.9488
	14.4673
	19.9701
	10.3628
	18.3216
	13.0567
	11.5973
	15.2746
	15.4043
	11.2284
	11.8138
	10.6743
	41.7317
	27.8454
	11.4153
	13.3227
	10.7085
	14.4378
	13.6814
	13.4951
	27.3406
	20.3805
	12.1608
	13.2699
	11.4529
	11.7325
	29.7819
	11.5595
	20.3285
	12.9532
	12.3023
	17.7934
	13.7434
	20.3502
	16.588
	13.0882
	16.5282
	14.1238
	30.9903
	36.0176
	14.1271
	13.1408
	14.8638
	10.0482
	16.9126
	11.541
	13.0544
	16.556
	11.9428
	14.6717
	24.8375
	19.8159
	10.0506
	13.5266
	10.0606
	11.7552
	13.1851
	23.252
	10.9229
	15.6149
	12.9368
	23.1261
	10.0345
	12.5531
	10.9812
	12.3338
	11.9584
	18.244
	11.0378
	10.3568
	10.1829
	15
	12.9971
	29.7422
	12.0174
	10.3962
	15.9837
	11.8926
	35.7249
	12.054
	14.51
	14.1679
	16.1775
	10.7895
	10.0195
	13.9018
	16.7802
	11.9724
	10.8067
	11.5012
	13.0771
	22.5278
	34.6354
	10.1829
	15.9406
	12.6626
	13.1738
	11.4247
	18.1958
	14.9284
	11.1842
	18.4555
	13.4145
	29.3904
	12.8936
	13.7537
	10.0192
	13.6306
	12.8335
	16.3182
	11.5946
	11.7577
	14.0302
	20.1647
	10.3846
	13.7055
	18.5644
	18.5037
	27.1039
	18.1261
	24.2024
	11.6186
	22.5308
	11.3576
	20.2935
	16.3411
	10.8584
	11.0479
	16.9158
	22.2152
	11.1976
	13.7988
	11.7566
	13.4013
	18.0434
	37.3525
	19.7403
	21.0855
	13.9084
	13.2141
	14.1812
	13.1197
	20.9921
	18.9435
	16.8878
	18.5775
	39.5358
	14.4901
	27.1741
	18.4868
	18.5219
	10.8268
	12.9025
	12.5404
	14.7234
	11.9832
	13.2902
	12.9198
	26.1513
	15.8171
	15.544
	10.8949
	14.3651
	11.1541
	17.8026
	13.4656
	26.4152
	15.085
	26.0217
	21.0988
	12.4572
	15.2338
	17.4961
	13.4663
	15.4171
	31.9265
	13.9709
	17.7762
	17.7227
	18.552
	15.747
	13.9312
	13.683
	11.4523
	12.9829
	16.3662
	22.6629
	16.6789
	10.4145
	17.6501
	13.6672
	15.4771
	10.0518
	16.8129
	15.8192
	12.5209
	16.4504
	10.6351
	13.3725
	12.4079
	18.3454
	15.184
	15.9432
	22.1439
	12.1581
	11.13
	18.7041
	13.0887
	11.1728
	11.4322
	16.7394
	10.3702
	26.0785
	14.8466
	10.474
	17.4736
	16.0519
	11.09
	16.9762
	13.1468
	10.3981
	13.5547
	20.6865
	10.0309
	10.899
	10.5043
	11.9396
	11.4372
	14.8799
	10.9552
	11.443
	14.8946
	11.4046
	10.21
	17.506
	10.5097
	10.0193
	13.4757
	22.8868
	12.9295
	33.8163
	18.1836
	11.218
	12.9091
	14.0168
	11.9025
	10.3955
	16.855
	11.3878
	18.259
	14.736
	14.4909
	12.53
	17.55
	10.8201
	15.5032
	25.1725
	11.4259
	15.1113
	11.1905
	11.068
	18.3842
	10.8708
	20.0887
	17.737
	12.9518
	12.2362
	14.6541
	11.4443
	16.8856
	11.4745
	11.6889
	10.8988
	10.1865
	11.7454
	15.1862
	10.0925
	10.8547
	16.1036
	11.6591
	14.7869
	46.4795
	11.4808
	10.3155
	14.2352
	10.7324
	18.0152
	18.5118
	10.5783
	15.4432
	12.8083
	12.765
	26.4678
	10.1841
	20.0256
	11.274
	25.6882
	18.4176
	19.025
	19.8033
	11.8823
	13.0967
	36.2411
	10.6945
	14.1106
	11.27
	13.1742
	32.0124
	11.1046
	12.7308
	35.3436
	22.0492
	36.6088
	10.5216
	23.3102
	11.7186
	20.0963
	10.1027
	10.6789
	11.3621
	19.7999
	29.5482
	19.8102
	32.8413
	11.0542
	16.0016
	11.4847
	11.2776
	22.2723
	22.55
	35.8011
	11.555
	27.9901
	10.0784
	12.4258
	19.4623
	22.1217
	13.2681
	13.0529
	39.9701
	32.5389
	21.4154
	13.0366
	23.6851
	21.7966
	24.4678
	11.8626
	30.9889
	18.211
	12.5228
	17.5066
	11.7766
	29.2504
	25.1266
	35.0606
	26.8399
	10.1571
	20.3952
	11.9357
	26.1899
	27.0314
	10.9973
	15.1491
	11.2577
	25.3589
	21.9657
	11.5282
	24.0554
	25.1644
	11.4455
	20.6529
	16.255
	17.8727
	26.6991
	17.8931
	21.7219
	30.9507
	12.7047
	13.65
	25.4074
	14.2957
	28.8118
	16.9834
	11.2842
	26.3154
	24.6342
	10.4028
	31.0412
	20.1457
	24.3307
	13.5673
	18.5278
	22.4769
	22.934
	13.5689
	38.1498
	19.5538
	21.6596
	10.2365
	12.5447
	17.2693
	13.2072
	33.1074
	14.086
	12.6923
	12.8295
	22.1068
