# Supplementary material for: Feedback inhibition underlies new computational functions of cerebellar interneurons
Source: eLife. 2022 Dec 8;11:e77603. doi: 10.7554/eLife.77603 (PMC9771357; doi:10.7554/eLife.77603)
Supplement: Figure 2—source data 1. — MLI, molecular layer interneuron; PC, Purkinje cell. [file elife-77603-fig2-data1.xlsx]

## Sheet: Figure 2c
normalized IPSC (50 Hz, 100 stimuli)
	extracellular stimulation			dual recordings
time (s)	cell 1	cell 2	cell 3	cell 1	cell 2		average	SEM
0.02	1	1	1	1	1		1	0
0.04	0.86279	1.09757	0.87106	0.99277	1.07157		0.97915	0.04898
0.06	0.88958	0.80856	0.81091	1.3558	1.10749		0.99447	0.1055
0.08	0.76291	0.87689	0.82188	1.4979	1.26525		1.04497	0.1434
0.1	0.88088	0.859	0.83907	1.4797	1.10936		1.0336	0.12174
0.12	0.73929	0.81342	1.0271	1.07033	1.33017		0.99606	0.10426
0.14	0.63311	0.72016	0.91761	1.33526	1.57108		1.03544	0.18055
0.16	0.79487	0.80543	0.76684	1.13169	1.14897		0.92956	0.08632
0.18	0.69305	0.6219	0.77889	1.34236	1.30822		0.94888	0.15576
0.2	0.89186	0.94974	0.86141	1.42588	0.87576		1.00093	0.10729
0.22	0.67109	0.90935	0.8005	0.91488	1.10454		0.88007	0.07158
0.24	0.69507	0.68994	0.72606	1.81631	1.10565		1.00661	0.21696
0.26	0.70702	0.60459	0.76854	0.76729	0.83667		0.73682	0.03891
0.28	0.69807	0.54273	0.73188	0.9095	1.40544		0.85752	0.14887
0.3	0.60589	0.71842	0.49816	1.23998	0.84153		0.7808	0.12824
0.32	0.63134	0.49081	0.54975	0.97834	1.12214		0.75448	0.12488
0.34	0.84883	0.43493	0.62558	0.87605	1.30025		0.81713	0.14503
0.36	0.76263	0.60107	0.56547	1.02591	1.01005		0.79303	0.0977
0.38	0.58265	0.51746	0.67848	1.1092	0.73111		0.72378	0.10323
0.4	0.72556	0.71218	0.4772	0.73647	0.79468		0.68922	0.05484
0.42	0.6356	0.37626	0.64777	0.85001	1.00886		0.7037	0.10712
0.44	0.77268	0.77284	0.53295	0.99545	0.38403		0.69159	0.10613
0.46	1.01201	0.65035	0.5368	1.11423	0.51781		0.76624	0.12436
0.48	0.68299	0.53131	0.53557	0.91373	0.81123		0.69497	0.0754
0.5	0.74063	0.61249	0.53575	0.97326	0.77406		0.72724	0.07508
0.52	0.64171	0.4437	0.44952	1.22528	0.63798		0.67964	0.14309
0.54	0.71536	0.77888	0.61146	1.093	1.03865		0.84747	0.09346
0.56	0.56822	0.33586	0.55442	0.76112	0.90272		0.62447	0.09682
0.58	0.76283	0.52653	0.59946	0.95949	0.78418		0.7265	0.07585
0.6	0.67819	0.76353	0.559	0.82928	1.00836		0.76767	0.07526
0.62	0.77747	0.5662	0.57567	0.87094	0.74214		0.70648	0.05922
0.64	0.86269	0.65264	0.67345	0.88235	0.97655		0.80954	0.06291
0.66	0.93196	0.49741	0.60413	0.93504	1.56495		0.9067	0.18625
0.68	0.60732	0.54812	0.60566	0.70607	0.74035		0.6415	0.03544
0.7	0.74902	0.64046	0.52897	1.08067	0.83751		0.76733	0.0939
0.72	0.90141	0.12237	0.49587	0.58339	1.13477		0.64756	0.17389
0.74	0.80754	0.33233	0.66678	0.69498	0.74324		0.64897	0.08268
0.76	0.91996	0.76068	0.62094	0.91171	0.51809		0.74628	0.07922
0.78	0.66749	0.60442	0.64419	0.86865	0.57005		0.67096	0.05216
0.8	0.81567	0.41339	0.627	0.6851	1.30308		0.76885	0.14851
0.82	0.56991	0.4398	0.66936	0.64992	0.89315		0.64443	0.07414
0.84	0.64612	0.56811	0.5798	0.59758	0.59007		0.59634	0.0134
0.86	0.67252	0.4805	0.56084	0.77857	1.24911		0.74831	0.13497
0.88	0.77605	0.66457	0.63158	0.8824	0.82762		0.75644	0.04762
0.9	0.82284	0.52024	0.62778	1.144	1.05026		0.83302	0.11916
0.92	0.69441	0.37617	0.58805	1.06299	0.725		0.68932	0.11163
0.94	0.81163	0.31003	0.61005	0.69074	0.91751		0.66799	0.10366
0.96	0.63164	0.5757	0.64382	0.76659	0.78896		0.68134	0.04116
0.98	0.81133	0.69577	0.59124	0.90817	1.08724		0.81875	0.08574
1	0.88871	0.15171	0.58644	0.59658	0.91647		0.62798	0.13798
1.02	0.81613	0.50484	0.53537	1.34024	0.82401		0.80412	0.14996
1.04	0.64337	0.30893	0.67772	0.60837	0.69514		0.58671	0.07102
1.06	0.72727	0.62586	0.62236	0.56604	0.94307		0.69692	0.0668
1.08	0.84527	0.75348	0.56362	0.86882	0.71279		0.7488	0.05446
1.1	0.76366	0.6583	0.64738	0.76097	0.81358		0.72878	0.03243
1.12	0.82254	0.53827	0.64201	0.68294	0.59059		0.65527	0.04837
1.14	0.58659	0.54465	0.62169	0.78598	1.10506		0.72879	0.10258
1.16	0.84833	0.63124	0.5723	0.99989	0.89129		0.78861	0.08072
1.18	0.5694	0.54466	0.65284	0.96123	0.47529		0.64068	0.08502
1.2	0.689	0.43323	0.55487	1.0406	0.93515		0.73057	0.11379
1.22	0.89542	0.53861	0.59749	0.82592	0.60144		0.69178	0.0707
1.24	0.58483	0.66763	0.61209	0.66245	1.03352		0.7121	0.08184
1.26	0.73178	0.46311	0.60345	0.94064	0.79555		0.70691	0.08162
1.28	0.63558	0.70545	0.65395	0.85702	1.13995		0.79839	0.09384
1.3	0.75927	0.32198	0.55623	0.76318	0.79003		0.63814	0.08946
1.32	0.83132	0.71533	0.56953	0.81283	0.94423		0.77465	0.06286
1.34	0.67095	0.53805	0.62567	0.97312	0.72344		0.70625	0.07333
1.36	0.6788	0.21344	0.61416	0.96356	0.44165		0.58232	0.12481
1.38	0.75107	0.61544	0.62693	1.13548	0.87427		0.80064	0.09604
1.4	0.70708	0.82425	0.59796	0.81091	0.78359		0.74476	0.04194
1.42	0.66839	0.56698	0.58028	0.94378	0.73616		0.69912	0.06847
1.44	1.05606	0.52775	0.61297	0.76361	0.92212		0.7765	0.09699
1.46	0.66254	0.69025	0.61287	0.97758	0.64267		0.71718	0.06631
1.48	0.69205	0.83955	0.66007	0.83471	0.71978		0.74923	0.03712
1.5	0.82466	0.48468	0.64674	0.81948	0.87345		0.7298	0.07234
1.52	0.82229	0.53184	0.60671	1.01478	0.83561		0.76225	0.08661
1.54	0.79315	0.52348	0.57888	0.50262	0.94867		0.66936	0.08678
1.56	0.60834	0.46566	0.63255	0.82952	0.70052		0.64732	0.05948
1.58	0.80167	0.64473	0.54008	0.69958	0.83097		0.70341	0.05294
1.6	0.67941	0.65702	0.58982	0.92701	1.05504		0.78166	0.08907
1.62	0.64846	0.45731	0.56412	0.63829	0.69914		0.60146	0.042
1.64	0.76563	0.73316	0.57428	0.95548	0.88854		0.78342	0.06604
1.66	0.59571	0.57309	0.59339	0.84657	1.14985		0.75172	0.11154
1.68	0.77965	0.55902	0.57985	0.59584	0.5741		0.61769	0.04092
1.7	0.88568	0.74378	0.60184	0.75369	0.8128		0.75956	0.04685
1.72	0.51338	0.38608	0.59998	0.82412	2.14419		0.89355	0.32071
1.74	0.6319	0.63749	0.5741	0.59591	0.68832		0.62554	0.01956
1.76	0.68584	0.58256	0.59554	0.9319	0.78726		0.71662	0.06516
1.78	0.75824	0.54571	0.56054	0.70381	0.83553		0.68077	0.0562
1.8	0.69484	0.51633	0.57641	0.92126	1.48786		0.83934	0.1763
1.82	0.72884	0.22393	0.60143	0.73781	0.6047		0.57934	0.09352
1.84	0.4942	0.46518	0.59251	0.64342	0.61604		0.56227	0.03496
1.86	0.65869	0.69837	0.63586	1.42997	0.65762		0.8161	0.1538
1.88	0.85608	0.57121	0.54869	1.1091	0.78191		0.7734	0.10271
1.9	0.66623	0.30971	0.59559	0.93703	0.76383		0.65448	0.1035
1.92	0.72692	0.57343	0.53244	0.81656	0.8765		0.70517	0.06687
1.94	0.7962	0.42636	0.58976	1.22307	0.56486		0.72005	0.13895
1.96	0.49097	0.43987	0.51391	1.10036	0.88172		0.68537	0.13004
1.98	0.57462	0.71358	0.47824	0.79797	0.56384		0.62565	0.05726
2	0.64257	0.52713	0.47944	0.79805	0.82686		0.65481	0.06976

## Sheet: Figure 2d
Depression time constant (s)
frequency (Hz)							average	SEM
10	0.5265	0.81833	0.85	0.39916			0.6485	0.11049
25	0.37365	0.16273	0.35304	0.30506			0.29862	0.04752
50	0.05821	0.17995	0.17833	0.16	0.18		0.1513	0.02358
100	0.08	0.11649					0.09825	0.01825

## Sheet: Figure 2e
Steady-state IPSC
frequency (Hz)							average	SEM
10	0.28588	0.67412	0.88482	0.73097			0.64395	0.12738
25	0.34355	0.6432	0.68166	0.39623			0.51616	0.08549
50	0.68544	0.5517	0.5677	0.8801	0.86875		0.71074	0.07073
100	0.4126	0.69677					0.55469	0.14209

## Sheet: Figure 2f
steady-state charge transfer (IPSC amplitude x frequency)
frequency (Hz)							average	sem
10	0.44395	1.04686	1.37406	1.13513			1	0.1978
25	1.33377	2.64641	1.53829	2.4971			2.00389	0.3319
50	5.32217	4.2837	4.40795	6.8336	6.7455		5.51858	0.5492
100	6.41198	10.8202					8.61608	2.2041

## Sheet: Figure 2g
cumulative charge (pC) transfer during 50 Hz stimulation
	extracellular stimulation			dual recordings
time (s)	cell 1	cell 2	cell 3	cell 1	cell 2		average	sem
0.02	0.43455	0.45923	0.60864	0.19686	0.04405		0.34867	0.10075
0.04	0.88535	1.08888	0.98595	0.41432	0.13458		0.70182	0.18285
0.06	1.28472	1.52504	1.33702	0.76817	0.22092		1.02717	0.23742
0.08	1.61026	1.96394	1.73906	1.23314	0.38913		1.38711	0.27623
0.1	2.00919	2.32279	2.15246	1.65856	0.46895		1.72239	0.33188
0.12	2.30085	2.66878	2.74501	1.92339	0.64125		2.05586	0.38271
0.14	2.55336	2.9184	3.17665	2.27062	0.81485		2.34678	0.41296
0.16	2.92645	3.22769	3.54817	2.56765	0.92602		2.6392	0.45799
0.18	3.20799	3.46008	3.85383	2.96565	1.04094		2.9057	0.4888
0.2	3.61685	3.8746	4.2707	3.35473	1.06858		3.23709	0.56282
0.22	3.89493	4.2631	4.65033	3.57474	1.13931		3.50448	0.61806
0.24	4.20524	4.48092	4.94912	4.14203	1.20727		3.79692	0.66285
0.26	4.54859	4.65865	5.31967	4.27275	1.23627		4.00719	0.71374
0.28	4.82317	4.7997	5.65742	4.4634	1.40788		4.23031	0.73256
0.3	5.05338	5.06488	5.92828	4.78276	1.43492		4.45284	0.77874
0.32	5.31182	5.15823	6.13863	5.02949	1.51738		4.63111	0.80212
0.34	5.6833	5.27301	6.44012	5.23579	1.62119		4.85068	0.83594
0.36	5.99063	5.51625	6.63882	5.50794	1.67885		5.0665	0.87177
0.38	6.15841	5.6268	6.8285	5.80371	1.69649		5.22278	0.90524
0.4	6.43837	5.85819	6.96748	5.91913	1.73401		5.38344	0.93415
0.42	6.77962	5.9021	7.1141	6.12277	1.8394		5.5516	0.95339
0.44	7.11224	6.17688	7.26162	6.37839	1.84902		5.75563	0.99838
0.46	7.53911	6.37203	7.44978	6.71415	1.8668		5.98837	1.05361
0.48	7.80902	6.5054	7.6514	6.93547	1.94579		6.16942	1.0822
0.5	8.08431	6.70397	7.81721	7.18838	1.98393		6.35556	1.11918
0.52	8.32597	6.79502	7.91303	7.56826	2.00096		6.52065	1.15755
0.54	8.58453	7.0673	8.10495	7.8667	2.07007		6.73871	1.19269
0.56	8.73668	7.10014	8.32796	7.99139	2.14332		6.8599	1.20958
0.58	8.96046	7.21118	8.37372	8.19068	2.16977		6.98116	1.23536
0.6	9.19393	7.54395	8.48219	8.37365	2.2533		7.1694	1.2566
0.62	9.51856	7.71896	8.60223	8.55559	2.30765		7.3406	1.29006
0.64	9.88125	7.88324	8.72982	8.77467	2.38377		7.53055	1.32525
0.66	10.2663	7.99243	8.87113	8.98815	2.55407		7.73441	1.34493
0.68	10.5254	8.14892	8.95316	9.11165	2.58565		7.86495	1.37419
0.7	10.7634	8.33884	8.98708	9.38702	2.6371		8.02269	1.4037
0.72	11.1341	8.34538	9.01983	9.47544	2.7633		8.14762	1.42255
0.74	11.483	8.42114	9.25571	9.59042	2.80154		8.31036	1.46556
0.76	11.8535	8.68671	9.38793	9.77747	2.81172		8.50346	1.51752
0.78	12.1399	8.85984	9.42334	9.97481	2.82489		8.64456	1.55738
0.8	12.441	8.90566	9.45563	10.0825	2.94518		8.76601	1.57506
0.82	12.6151	8.99105	9.49549	10.199	3.02787		8.8657	1.58632
0.84	12.739	9.17665	9.53405	10.2846	3.04442		8.95576	1.60322
0.86	12.9605	9.31027	9.58263	10.4271	3.23005		9.10212	1.6031
0.88	13.2578	9.53138	9.6127	10.6307	3.29384		9.26528	1.6379
0.9	13.5624	9.6783	9.66264	10.9252	3.3596		9.43763	1.67746
0.92	13.7676	9.74942	9.695	11.1714	3.38803		9.55429	1.7095
0.94	14.0237	9.78427	9.74858	11.2865	3.44159		9.65691	1.73751
0.96	14.1655	9.98308	9.82193	11.4277	3.50319		9.78028	1.75198
0.98	14.4428	10.2887	9.88186	11.615	3.61962		9.96959	1.77691
1	14.7342	10.3031	10.0503	11.7097	3.67224		10.0939	1.80868
1.02	14.9916	10.509	10.0995	12.0787	3.72704		10.2812	1.85015
1.04	15.1185	10.539	10.1319	12.1703	3.75538		10.343	1.86581
1.06	15.2996	10.7681	10.2519	12.2471	3.84194		10.4817	1.87816
1.08	15.5691	11.0469	10.3895	12.4312	3.86721		10.6608	1.91835
1.1	15.8008	11.3011	10.4345	12.5957	3.91817		10.8101	1.94905
1.12	16.1129	11.4601	10.4934	12.733	3.93437		10.9467	1.99402
1.14	16.2453	11.5915	10.5234	12.8803	4.04631		11.0574	1.99954
1.16	16.5617	11.7545	10.6109	13.1122	4.08515		11.2249	2.04544
1.18	16.6704	11.8955	10.7211	13.3186	4.09636		11.3404	2.06749
1.2	16.8855	11.9399	10.9767	13.5683	4.19338		11.5128	2.08729
1.22	17.2067	12.0613	11.0419	13.7436	4.20804		11.6523	2.13521
1.24	17.3525	12.2771	11.1149	13.8523	4.31717		11.7828	2.14162
1.26	17.6231	12.3234	11.2175	14.0624	4.38691		11.9227	2.17392
1.28	17.778	12.5588	11.2896	14.2722	4.55683		12.0911	2.17628
1.3	18.0497	12.5929	11.3804	14.4068	4.63187		12.2123	2.20443
1.32	18.3582	12.8058	11.4399	14.6008	4.74887		12.3907	2.23573
1.34	18.5522	12.966	11.5601	14.8361	4.77698		12.5383	2.26744
1.36	18.744	12.9841	11.6361	15.0872	4.78648		12.6476	2.30273
1.38	19.0251	13.212	11.714	15.3871	4.86038		12.8397	2.34332
1.4	19.2342	13.4714	11.8247	15.5538	4.92974		13.0028	2.3677
1.42	19.4153	13.6049	11.9465	15.7836	5.00326		13.1507	2.38972
1.44	19.8517	13.7323	12.0105	15.9298	5.09031		13.3229	2.44015
1.46	20.0681	13.9586	12.1165	16.1543	5.12627		13.4848	2.47415
1.48	20.2751	14.2044	12.1696	16.3538	5.15877		13.6323	2.508
1.5	20.5877	14.3147	12.3621	16.5257	5.20437		13.7989	2.54676
1.52	20.8667	14.4334	12.3966	16.7552	5.26499		13.9434	2.58637
1.54	21.1642	14.5887	12.4971	16.7945	5.34334		14.0776	2.61389
1.56	21.326	14.667	12.6979	16.9879	5.38245		14.2122	2.63415
1.58	21.5969	14.8544	12.7356	17.1329	5.44616		14.3532	2.66834
1.6	21.7931	15.077	12.8922	17.3803	5.56976		14.5425	2.68461
1.62	21.9884	15.1293	13.0661	17.5056	5.60055		14.658	2.70774
1.64	22.2726	15.3678	13.2137	17.7158	5.70655		14.8553	2.7373
1.66	22.4552	15.5012	13.3531	17.8865	5.81862		15.0029	2.74931
1.68	22.8078	15.6591	13.4592	18.001	5.84163		15.1538	2.79762
1.7	23.2743	15.8878	13.5001	18.1694	5.89091		15.3445	2.86295
1.72	23.4562	15.9199	13.5793	18.3291	6.1601		15.4889	2.84959
1.74	23.7794	16.1208	13.7474	18.4302	6.20607		15.6568	2.8883
1.76	24.0629	16.3014	13.8	18.6182	6.27364		15.8112	2.92592
1.78	24.4114	16.447	13.9181	18.7528	6.34812		15.9755	2.96665
1.8	24.7479	16.5802	14.0596	18.9689	6.47656		16.1666	2.99999
1.82	25.0284	16.6013	14.2098	19.1212	6.49016		16.2902	3.04004
1.84	25.2428	16.7378	14.4695	19.2348	6.50653		16.4383	3.0655
1.86	25.505	17.0197	14.6136	19.6423	6.54342		16.6648	3.11279
1.88	25.8957	17.1965	14.6962	19.9401	6.58444		16.8626	3.17422
1.9	26.1945	17.2455	14.7975	20.1787	6.65288		17.0138	3.21415
1.92	26.5568	17.4143	14.8858	20.3523	6.7115		17.1841	3.26263
1.94	26.9446	17.474	14.934	20.6428	6.72277		17.3436	3.32934
1.96	27.0947	17.5592	15.1372	20.9034	6.79336		17.4976	3.34559
1.98	27.3037	17.7739	15.3481	21.0612	6.80717		17.6588	3.37425
2	27.6321	17.9179	15.4894	21.2308	6.84214		17.8225	3.41954

## Sheet: Figure 2h
RRP (quanta)
frequency (Hz)							average	SEM
10	147.683	51.0176	72.0298	53.1255			80.964	22.7359
25	150.562	59.0958	69.3968	195.766			118.705	32.8352
50	144.132	70.2539	37.3618	52.9699	17.5129		64.4462	21.7389
100	151.576	210.054		--	--		180.815	29.2393

## Sheet: Figure 2i
Mobilization (quanta/sec)
frequency (Hz)							average	SEM
10	42.2075	40.5793	22.1025	29.0176			33.4767	4.79522
25	47.5784	92.3288	42.4371	90.9608			68.3262	13.5067
50	112.114	36.9315	94.749	84.1049	164.873		98.5544	20.7396
100	395.695	549.907					472.801	77.1062
