# Supplementary material for: Feedback inhibition underlies new computational functions of cerebellar interneurons
Source: eLife. 2022 Dec 8;11:e77603. doi: 10.7554/eLife.77603 (PMC9771357; doi:10.7554/eLife.77603)
Supplement: Figure 3—source data 1. — MLI, molecular layer interneuron; PC, Purkinje cell. [file elife-77603-fig3-data1.xlsx]

## Sheet: Figure 3e
Comparison of input field areas of PC-MLIs with PC optical footprints
		PC optical footprint			PC-MLI input field			IPSC peak amplitude (pA)			20-80-% rise time (ms)
		µm2			µm2
		20741			21753			28.51			2.28
		20994			52106			31.06			1.63
		17453			47553			30.7			2.41
		25041			47300			55.79			1.38
		30859			33135			19.92			2.11
		17200			10623			35.61			1.17
		23523			17706			40.61			1.29
		22512			17453			98.42			0.99
		9865			6071			32.26			1.45
		27823			55647			24.89			2.58
		16947			44517			38.37			2.18
		14923			19223			28.59			2.29
		20741			33135			50.43			1.21
		11382			30353			35.87			2.22
					12394			32.37			1.12
					35665			39.86			1.09
					17200			38.67			1.95
					35159			41.16			1.08
	mean	20000.3			29832.9			39.0606			1.69056
	SD	5894.91			15257			17.1084			0.550331
	SEM	1575.48			3596.1			4.0325			0.129714

## Sheet: Figure 3f
Distance between PC and PC-MLI
MLI-PC somatic distance (µm)			# cells
50			20
100			13
150			13
200			6
250			1
300			1
	# input area		MLI-PC somatic distance (µm)
cell1	1		5
cell2	1		15
cell3	1		60
cell4	1		125
cell5	1		92
cell6	1		117
cell7	1		12
cell8	1		163
cell9	1		60
cell10	1		119
cell11	1		3
cell12	1		22
cell13	1		62
cell14	1		37
cell15	1		112
cell16	1		115
cell17	1		172
cell18	1		177
cell19	1		59
cell20	1		171
cell21	1		62
cell22	1		109
cell23	1		17
cell24	1		3
cell25	2		33
			187
cell26	1		46
cell27	2		144
			27
cell28	1		134
cell29	1		60
cell30	1		76
cell31	1		24
cell32	1		43
cell33	1		17
cell34	1		91
cell35	1		183
cell36	1		16
cell37	1		47
cell38	1		14
cell39	1		59
cell40	1		131
cell41	1		14
cell42	1		58
cell43	1		139
cell44	1		66
cell45	1		4
cell46	1		76
cell47	1		106
cell48	1		226
cell49	1		150
cell50	2		263
			23
cell51	1		129

## Sheet: Figure 3g
PC-MLI position ralative to presynaptic PCs
	n
apical	23
juxtaposed	21
basal	10
	# input area		PC-MLI position ralative to presynaptic PCs
cell1	1		juxtaposed
cell2	1		juxtaposed
cell3	1		apical
cell4	1		apical
cell5	1		basal
cell6	1		apical
cell7	1		juxtaposed
cell8	1		apical
cell9	1		basal
cell10	1		apical
cell11	1		juxtaposed
cell12	1		juxtaposed
cell13	1		apical
cell14	1		juxtaposed
cell15	1		apical
cell16	1		basal
cell17	1		apical
cell18	1		apical
cell19	1		apical
cell20	1		juxtaposed
cell21	1		apical
cell22	1		apical
cell23	1		justaposed
cell24	1		juxtaposed
cell25	2		juxtaposed
			basal
cell26	1		juxtaposed
cell27	2		apical
			juxtaposed
cell28	1		apical
cell29	1		apical
cell30	1		basal
cell31	1		juxtaposed
cell32	1		juxtaposed
cell33	1		juxtaposed
cell34	1		apical
cell35	1		apical
cell36	1		juxtaposed
cell37	1		juxtaposed
cell38	1		juxtaposed
cell39	1		apical
cell40	1		basal
cell41	1		juxtaposed
cell42	1		apical
cell43	1		apical
cell44	1		basal
cell45	1		juxtaposed
cell46	1		basal
cell47	1		apical
cell48	1		apical
cell49	1		basal
cell50	2		basal
			juxtaposed
cell51	1		apical

## Sheet: Figure 3h
connectivity (%) between PC and PC-MLI at different ages
	age	p14-21	p22-28	p29-35	p36-42	p43-49	p50-56	p>57
	response	3	10	21	15	7	5	2
	no response	37	32	122	102	31	14	10
	total	40	42	143	117	38	19	12
connectivity	%	7.5	23.8	14.7	12.8	18.4	26.3	16.7

## Sheet: Figure 3i & j
	IPSC peak amplitude (pA) from all pixels					IPSC rise time (ms) from all pixels
	26.05					1.5
	40.6					2.3
	22.75					2
	27.9					2.2
	28.8					1.7
	20.55					1
	38.6					5.1
	29.3					1.4
	43					1
	25.45					2.9
	28.45					1.3
	29.35					0.6
	31.1					3.4
	38.5					1.2
	26					2
	33.5					1.1
	29.55					5.6
	32.6					3.3
	36.4					1.8
	31.8					5.4
	16.15					0.8
	36.6					1.2
	26.9					2.4
	22.4					3.8
	23.4					1.9
	29.25					3.1
	30.9					1.4
	31.15					3.8
	35.9					3.6
	47.9					0.8
	26.35					2.6
	29.2					1.2
	19					4
	19.3					5.9
	36.05					0.8
	19.5					1.4
	30.3					2.3
	34.55					3.4
	36.6					1.8
	29.2					1.1
	28					0.6
	32.75					0.8
	33.75					2.4
	33.8					1.7
	37.4					3.4
	41.9					5.2
	31.5					1.1
	29.8					1.5
	25.7					1.2
	16.95					1.6
	17.2					2.3
	27.3					1.6
	19.5					2.6
	30.75					3.5
	29.2					1
	23					3
	46					1
	29.35					3.1
	24.7					6.2
	19.15					2.9
	39.75					2.8
	17					1.4
	28.3					1.5
	27.2					3.3
	35.1					1.1
	18.6					1.2
	19.45					3.2
	23.5					0.9
	20.55					3.7
	33.65					3.6
	23.3					2.7
	30.9					5.2
	26.3					0.8
	26.7					0.8
	25.2					0.6
	25.7					1.6
	19					1
	29.55					2
	41.4					4.2
	17.15					1.3
	24.4					1.4
	17.3					0.7
	34.8					5
	33.1					1.2
	16.85					1.2
	29.15					2.7
	20.55					1.1
	26.6333					1
	17.2					1.3
	23.3					3.2
	25.75					1.5
	22.6					1.6
	18.1					1.93333
	24.8					1
	30.7					1.6
	45.85					1.6
	40.55					1.3
	25.75					1.3
	25.1667					1.53333
	32.2					1.86667
	24.2					0.93333
	34.5667					1.06667
	46.2					0.93333
	24.0333					1.4
	34.0333					1.33333
	21.3					1
	40					0.9
	30.2667					1
	35.9					1
	22.5					1.26667
	39.35					0.9
	40.7333					1.46667
	59.1333					0.86667
	38					0.86667
	41.7667					0.8
	30.4333					0.93333
	40.8333					1.26667
	24					0.93333
	37.0333					3.4
	23.1333					0.8
	45.2					4.7
	23.75					2.225
	44.1					0.9
	30.8667					1.7
	55.7					0.7
	33.8667					1.73333
	33.55					1.1
	23.45					0.9
	31.9					1.66667
	30.35					0.8
	35.45					1.4
	33.15					2.1
	36.45					0.7
	19.8333					0.66667
	30.3					1.13333
	44.2667					0.73333
	27.8					1.06667
	25.45					1.2
	28.2					0.86667
	42.6					1.1
	35.55					4.8
	34.0667					4.6
	23.6					1.7
	33.1667					0.8
	39.3667					1.13333
	39.7					0.9
	25.5333					1.2
	34.9					0.9
	29.7667					0.8
	35.2667					1.86667
	34.2					1.53333
	24.35					1.6
	47.3					0.9
	34.6					0.93333
	23.6					2.4
	29.0667					0.66667
	35.4					0.8
	37.85					1.1
	32.1					1.26667
	21.1					0.8
	39.95					1.1
	37.65					1.1
	32.9					4.06667
	33.9					1
	33.5					0.93333
	32.05					4.6
	22.7333					2.4
	39.65					0.9
	40					1.8
	22.3					1.86667
	34.6667					1.86667
	36.5667					1.33333
	21.4					1.26667
	32.1667					1.4
	29					1.3
	18.6667					3.2
	32.2					2.93333
	36.1667					2.9
	28.1					1.2
	36.5333					1.93333
	36.7333					2.13333
	26.6					0.8
	33.4					3
	23.4					1.2
	27.0667					0.93333
	32.1					0.86667
	33.6					1
	32.65					1.9
	25.45					1.55
	28.3667					3.4
	40.4					4.6
	22.55					0.8
	29.6					1.93333
	30.7					1.2
	28.4667					1.66667
	28.9333					2.33333
	43.4667					1.06667
	32.5					0.86667
	16.9667					1.4
	23.4333					1.06667
	26.9667					2.53333
	29.6					0.93333
	39.9					1.2
	24.2333					2.4
	44.8					1.1
	27.4667					2.46667
	52.3					1.8
	34.1333					2.6
	31.65					2.2
	29.7333					1.73333
	44.1					1.73333
	36.1333					0.8
	28.25					2.7
	20.7					1.93333
	38.7333					1.8
	38.9					2.86667
	28.9					1.06667
	41.1667					1.06667
	19.6667					2.73333
	31.9					2.8
	80.2					0.8
	23.6333					1.4
	31.6667					2.6
	41					2.2
	25.0667					0.8
	18.6					0.8
	32.95					1.3
	41.3333					2.53333
	29.7667					1.4
	29.7					1.5
	21.2667					1.46667
	37.1667					1.2
	25.6					2.33333
	29.1					1.2
	32.9					1
	41.8333					1.4
	22.75					1.1
	25.65					1
	24.8					2
	24.9667					3.1
	24.5					1.5
	25.2					1.5
	38.3667					1.4
	36.2333					1.33333
	47.1333					1.6
	25					1.3
	27.4					2.4
	27.4					2.3
	23.4					0.9
	21.45					2.2
	28.1333					0.86667
	26.45					3.6
	31.15					1.5
	27.7					1.7
	45.4667					1.73333
	34.8333					1
	26.6333					1.4
	35.8					2.4
	28.55					1
	26.55					1
	19.4					1.1
	38.7					1.66667
	22.7333					1.26667
	32.4					1.13333
	25.9333					1.26667
	31.5					2.8
	32.45					1.6
	28.4					1
	15.8					0.9
	29.85					2
	27.05					3.5
	23.4667					2.26667
	30.9333					1.06667
	19.6					0.9
	27.2					3
	31.5					2.8
	25.9667					2.53333
	23.45					3.1
	30.65					1.3
	31.7					2.9
	22.0333					1.86667
	28.1333					1.6
	24.3					1
	25.6333					1.13333
	17.7333					1.93333
	25.5333					2.06667
	23.85					1.5
	20.6667					1.93333
	30.9					0.9
	31.3333					1.13333
	29.5					0.9
	23.4					1.1
	23.8					1.9
	23.4667					2.2
	21.5667					4.1
	24.35					1.5
	27.4333					2.53333
	28.3					3.4
	18.65					2.8
	36.7					2.5
	26.95					1.8
	26.7					1.8
	42.3					2.5
	32.6667					3.93333
	26.75					1.4
	28.1					2.9
	32.15					4.5
	44.05					1.6
	26.5					1.5
	21.95					3.2
	20.3333					2.6
	26.3					1.6
	27.2					6.8
	23.9333					2.86667
	32.1					3
	22.8667					1.46667
	31.3					1
	21.8					2
	23					1.8
	27.85					1.3
	22.85					2.8
	17.4					4.3
	21.45					1.7
	25.1667					3.4
	27.4					4
	26.3					3.2
	35.1333					5
	32.3					1.4
	23.35					2.8
	42.85					2.3
	29					3.4
	33.4					1.4
	29.1					2.06667
	23.6					1.4
	33.7					6.7
	21.15					1.3
	40.45					2.7
	35.2					2.2
	27.0667					2.73333
	23.7667					2.6
	32.6333					2.93333
	41.7333					2.26667
	30.3333					1.8
	28.6					1.3
	36.3667					4
	26.2333					1.73333
	26.9					3.1
	33.3667					1.86667
	43.4					3.4
	42					1.7
	49.5					2.33333
	23.1333					2.46667
	26.6667					4.66667
	33.55					4.5
	27.05					1.3
	38.4					1.4
	34.9					2.4
	25.3667					2.93333
	29.65					1.8
	26.25					1.7
	27.7667					2.13333
	35.8					1.5
	25.6					2.2
	39.3					1.5
	37.05					1.9
	40.1					1.5
	41.7333					2.46667
	28.2					2
	32.1333					1.4
	24.25					2.2
	23.9					1.9
	22.1					5.7
	26.2333					1.86667
	33.6333					5.4
	31.9333					2.1
	31.2					2.2
	34.2667					1.4
	34.7					2.33333
	34.4667					1.73333
	43.2667					3.53333
	47.2					1.1
	32.7333					1.7
	47.8667					2.2
	48.5667					1.2
	28					1.6
	49.7667					1.13333
	27.6333					1.7
	18.55					1.8
	24.0667					1.73333
	26.1333					2.53333
	24.9					2.6
	23.55					4.2
	33.5					4.66667
	29.35					1.1
	33.2333					3.13333
	29.6					3.9
	36.2					1.5
	28.8					2.1
	26.85					3.3
	31.2333					1.66667
	53.8					1.2
	39.5333					1.26667
	53.0333					1.53333
	43.4					1.6
	41.8					1.4
	27.6333					1
	27.85					4.5
	36.1667					3
	24.5333					5
	20.5333					2.7
	38.85					3
	39.95					1.7
	40.8					1.8
	29.1333					5.7
	28.8					1.4
	20.45					1.7
	29.25					3.1
	26.15					1.6
	21.4					1.66667
	29.8					1.93333
	44.8					3.06667
	33.7					1.46667
	38.05					2.1
	36.2					1.66667
	22.3					1.6
	23.15					2.3
	20.9					2.73333
	22.5667					3.93333
	21.5333					1.26667
	30.4					2.1
	24.3333					2.6
	22					2.3
	26.65					5
	23.65					1.9
	24.7333					1.93333
	44.05					2
	35.7333					1.4
	36.7667					2.33333
	35.5667					0.8
	36.7333					1.2
	37.4333					2.06667
	27.5333					2.2
	25.2					3.7
	29					2.46667
	20.85					1.3
	30.7					1.5
	33.1					1.93333
	36.0667					3.86667
	39.9667					1.46667
	17.2					2.3
	36.9					1.2
	42.1					1.3
	31.55					1
	52.6667					3.26667
	27.1333					1.66667
	31.7333					1.66667
	22.45					1.6
	34.6333					3.33333
	22.6					4
	28.35					2.8
	28.2					1.33333
	33.3667					1.8
	40.3667					2.73333
	36.2667					1.6
	23.9					2.4
	37.7667					1.4
	20.4333					2.33333
	30.9667					3.66667
	27					2.9
	43.85					1.1
	22.6667					1.73333
	16.8					3
	37.1					6.6
	20.7					0.9
	19.05					3.3
	30.95					2.1
	17					3.1
	29.75					1.4
	47.9					1.3
	21.65					2.1
	35.95					1.4
	45.25					1.2
	52.0667					1.26667
	33.5667					0.86667
	31.2					0.8
	70.5333					0.66667
	54.6667					1
	43.4333					2
	26					1.4
	43.7					0.73333
	71.6					1.4
	50.7					0.73333
	38.25					1.1
	83.0667					1.46667
	37.4					2
	47.3667					1.33333
	74.5333					1.13333
	65.1333					0.93333
	52.5333					0.66667
	81.1					0.9
	92.1667					0.8
	110.433					1.86667
	101.267					1.33333
	43.9					0.73333
	41.8					0.8
	46.8333					1.06667
	104.5					0.9
	35.4					2.7
	30.4667					1
	113					0.7
	60.4					1.33333
	61.2667					1.06667
	88.05					0.8
	58.2333					0.93333
	59.2					2.66667
	67.2					1.5
	69.7667					1.06667
	64.9667					1.33333
	57.1667					2
	47.2333					1.2
	44.35					1.5
	37.1					1.3
	60.75					1.2
	30.7					1
	60.9					2.4
	126.05					2.7
	54.9333					1.13333
	69.5333					1.6
	57.6667					2.4
	55.3667					1.6
	65.5					1.93333
	53.4667					1.06667
	75.2667					1.86667
	35.7333					2.8
	55.45					0.6
	30.25					1
	72.6333					1.6
	55.0333					1.13333
	53.1333					0.93333
	68.4333					0.73333
	57.0667					1.13333
	110.5					2.7
	62.3					1.46667
	77.1333					1.66667
	45.4667					1.86667
	36.3333					0.6
	31.3					1
	85.5667					1.8
	30.9667					1.06667
	49.1667					1.66667
	25.4					0.7
	52.8					1.06667
	87.7667					0.73333
	69.2667					0.93333
	86.2333					2.33333
	91.8333					1.8
	74.6333					1.2
	56.6667					0.8
	63.5					2
	104.433					1.66667
	96.1					1.13333
	47.4333					1.6
	40.3					1.23333
	60.4					1.2
	44.3667					1.4
	36.3					1.4
	38.6					1.4
	27.1333					1.53333
	57.2667					2.06667
	51.7667					1.2
	62.3					1.26667
	56.6					1
	67.7333					0.8
	33.5					0.93333
	47.5667					0.8
	53.6					1.13333
	51.3333					0.8
	53.3667					3.4
	47.3333					2.66667
	43					0.93333
	41.3333					1.2
	25.8333					1.06667
	40.4333					1.13333
	78.9333					1.66667
	76.4333					0.7
	119.5					2
	77.6333					1.06667
	70					2.13333
	39.8333					1.2
	58.9667					0.86667
	25.1333					1.93333
	40.8					1.4
	53.3					2.3
	61.7667					1.8
	35.9					0.86667
	50.7333					1.4
	23.6					0.5
	35.2					1.1
	46.3667					2
	45.2					0.93333
	30.5667					1
	33.5					1.26667
	63					1.26667
	76.6667					1.06667
	54.3333					0.86667
	59.9					0.8
	69.8333					1.93333
	58.4667					1.13333
	55.0333					1.93333
	77.2667					1.06667
	42.7667					0.8
	42.0667					1.2
	54					1.06667
	46.6333					1.26667
	42.4					1.3
	30					0.6
	29.05					0.9
	22.6667					1.4
	44					2.3
	29.05					2.3
	54.1					1.66667
	52.1667					2.53333
	65.5					2.8
	87.4667					0.86667
	65.2667					2.53333
	77.1					2.26667
	60.0333					1.06667
	39.2333					3.13333
	43.9					1.33333
	44.4					0.6
	25.1					0.73333
	62.35					1.25
	54.95					1.1
	55.8667					1.66667
	59.8333					0.93333
	85.2333					1.66667
	82.3667					2.2
	49.1333					1.73333
	69.6					1.66667
	32.9667					1.26667
	47.4					0.93333
	37					0.7
	26.5					1.93333
	34.45					0.8
	48.4667					1.13333
	93.05					1.5
	60.8					1
	99.0333					1.26667
	57.2667					0.8
	54.35					1.7
	50.6667					1.86667
	28.1333					1.53333
	32.45					0.7
	30.85					1.3
	26.15					1.1
	41.6333					1.73333
	61					3.7
	61.5					2.33333
	65.1333					1.2
	107.633					1
	28.85					0.9
	20.05					0.8
	20.05					1.5
	26.1667					1
	42.7667					0.73333
	50.4					0.9
	51.8667					0.86667
	22.65					2.1
	20.3					2.6
	21.3					1.7
	15.05					1.4
	17					1.5
	15					2.26667
	21.7					2.4
	21.3667					2.2
	21.3333					2.6
	15.9					1.5
	21.4					2.46667
	14.7					2.5
	26.5333					2.33333
	15.3667					1.66667
	28.1					2.46667
	21.1667					3.13333
	26.5					3.4
	21.8667					1.93333
	26.1333					2
	14.67					1.4
	26.2					1.4
	18.2667					2.6
	26.6					3.93333
	16.6					1.7
	15					1.4
	18.4					3.13333
	23					1.06667
	28					3.33333
	22.4					1.66667
	26.3333					2.66667
	20.1333					1.53333
	25.3333					1.6
	23.25					2.7
	24.6					2.9
	25.3					1.5
	21.15					1.1
	21.0667					2.06667
	23.6					2.73333
	14.9333					2.46667
	24.9					4.7
	14.5					1.66667
	14.5567					2.33333
	25.0667					2.4
	18.3					0.7
	15.1					1.2
	19.8					2.7
	23.1333					2.6
	19.3667					2.46667
	15					1.8
	20.2					2.53333
	12.2					3
	15.7					1.6
	19.1667					2.6
	15.7333					2.13333
	23.0667					1.8
	20.1667					1.73333
	18.5667					2.26667
	14					2.1
	21.4667					2.6
	17.6					1.93333
	21.5					1.73333
	16.6					0.7
	23.5333					3.53333
	28.15					4.7
	14.7					1.7
	21.2					2.93333
	20.8					2.73333
	19.3					1.9
	23.6667					1.66667
	21.2					1.9
	15.1333					0.93333
	14.8					1.3
	18.3					1.2
	27.8					2.6
	20.2667					2.06667
	20.75					2.8
	25.2					3.53333
	16.7667					3
	20.3333					1.26667
	21.9					2.4
	15.45					1.8
	16.7					1.4
	21.7					1
	15.8333					3.46667
	18.5					1.1
	19.5					4.33333
	22.1					1.46667
	20					2.1
	12.25					1.2
	20.5667					1.6
	16.6333					1.93333
	22.35					2.4
	24.4333					1.86667
	15.05					1.9
	24.65					4
	30.7					1.6
	23.1					2.5
	17.2					1.66667
	24.3					1.3
	24.35					3.1
	13.7333					1.66667
	23.95					1.5
	22.85					1.9
	19.45					1
	25					3.6
	24.2					1.4
	17.8667					2.06667
	16.1					3.2
	19.7					1.5
	22.2667					1.8
	16.7667					2.26667
	22.6					1.3
	21.8					1.9
	22.4					2.4
	16.55					1.6
	24.4					1.9
	23.15					2.3
	15.95					2.2
	18.5					2.3
	12.8					1.13333
	14					1.73333
	17					1.5
	14.7					1
	16.05					1.4
	17.75					2.1
	16.85					1.9
	14.45					1.6
	13.4233					2.13333
	18.85					1.4
	18					2.7
	14.8					1.7
	25.6					1.26667
	29.15					1.7
	38.8333					0.86667
	33.5333					1.13333
	45.7					1.3
	51.0333					0.8
	40.5					1.06667
	34.2667					0.8
	27.0333					1.06667
	51.1667					0.86667
	26.2667					1.13333
	39.3333					1.06667
	56.25					0.9
	39.7					1.2
	45.0333					1.06667
	43.4					0.7
	32.45					0.8
	48.6					0.86667
	41.3667					1.06667
	26.6333					1.4
	44.7667					1
	42.95					0.9
	36.5333					1.06667
	34.2667					1
	48.6					0.93333
	40.7					1.1
	38.7					1
	38.75					1.2
	32.6333					0.86667
	25.65					1
	53.7					0.93333
	26.1					0.6
	33.0333					1.13333
	19.8					1.1
	27.2					1.9
	25.25					1.2
	22.15					2.1
	20.55					1.8
	25.4					1.9
	26.05					1.2
	29.15					2.6
	27.65					1.4
	37.05					0.9
	31.8					1.06667
	37.3					0.7
	23.8333					1
	65.2					1.53333
	29.8333					0.8
	31.8					1
	63.8333					0.86667
	91.05					1.1
	53.2667					0.86667
	47.35					1.2
	50					0.9
	48.2					3.2
	116.9					0.9
	50.7					0.7
	47.0667					0.86667
	70.8					0.9
	43.85					2.6
	52.7333					1.4
	70.9333					1.53333
	58.8333					1.26667
	81.9333					1.8
	50.4333					1.33333
	31.35					0.9
	40.4667					1.33333
	76.7					0.9
	49.5667					1.4
	28					1.3
	46.15					0.8
	64.55					2
	65.4667					1.86667
	71.0333					1.2
	33					0.5
	54.25					0.8
	27.85					1.3
	36.2					1.2
	65.7					1.53333
	51.3333					1.4
	60.6					1.1
	32					0.93333
	45.5					1.6
	45					0.9
	26.1					3.3
	38.5					0.7
	25.05					1.4
	19.8					0.9
	20.9					1.2
	23.85					1.4
	32.8					2.1
	20.7					1.46667
	19.55					0.7
	33.65					1.7
	19.6667					1.26667
	30.05					1.1
	24.75					1.4
	22.75					1
	21.4					1.3
	17.9					1.3
	23.95					0.8
	25					1
	16.25					0.9
	21.95					1
	24.4					2.7
	26.95					1.1
	20.65					1
	21.7					2
	18.75					1.5
	22					2.13333
	22.8667					1.66667
	21.3					0.8
	125.5					1
	149.5					0.8
	143.5					0.9
	131					0.8
	25.95					0.8
	134					0.9
	125					0.9
	108					1
	87.7					1
	126.45					1.1
	130.5					0.9
	100.25					0.9
	89.25					1
	83.9					1
	78.1					1
	118					0.9
	61.85					1.2
	127.467					0.93333
	98.05					0.9
	112.133					1.06667
	130.333					0.93333
	23.75					1.2
	67.95					1
	90.75					1.1
	74.2333					1.13333
	108.2					1
	135.333					0.86667
	116.4					0.8
	91.2					1.1
	143.333					0.86667
	103.167					0.93333
	118.033					1
	139					0.86667
	99.25					1
	118					1.2
	123.5					0.8
	120.95					1.1
	129.5					0.9
	73.85					0.8
	113.333					0.93333
	93.1					0.8
	104.767					0.93333
	107.133					0.86667
	91.2					1.06667
	66.75					0.8
	107					1.13333
	85.95					1
	119.5					0.8
	72.05					1.1
	110					0.9
	41.2					1.3
	87.4667					1
	115.4					1.06667
	75.95					1
	48.25					1.1
	84.1667					1
	85.7					1.26667
	55.5					1.13333
	86.4					1.2
	87.7					0.9
	94.5667					0.93333
	89.85					0.8
	108.033					1
	84.65					0.9
	49.4					0.9
	56.6667					1.86667
	97.9					0.9
	123					1.1
	85.9					0.9
	28.5					1.6
	38.9					1.26667
	43.1333					1.33333
	22.35					2.8
	34.6333					1.26667
	23.6					0.86667
	48.4333					0.8
	32.3					1.8
	35.15					1
	36					2.13333
	36.6333					1.06667
	24.8					1.1
	27.5667					1.53333
	32.2					1.1
	46.3667					1.66667
	34.8667					1.26667
	36.15					1.8
	26.5					1
	30.7					0.8
	30.55					2.2
	24.9667					1.46667
	39.8					0.9
	18.15					1.4
	22.0333					2.6
	28.2					3.6
	34.5					2.1
	24					1.6
	29.55					1.6
	21.7					1.86667
	29.85					3.2
	23.6					1.93333
	30.45					5.4
	18.3					1.6
	26.3667					2
	19.1333					2.46667
	21.55					1.6
	27.7333					2.13333
	23					3.8
	23					1.2
	18					2.3
	25.4					1.7
	22.75					1.9
	20.45					1.7
	21.95					2.2
	26.1					2.13333
	25.5					2.3
	23.8					2.2
	20.65					2.5
	24.3					1.73333
	24.9					1.8
	27.05					1.8
	28.75					2.4
	22.95					1.1
	21.25					1.6
	24.45					2
	31					2.7
	23.5					1.7
	33.55					3.3
	20.9					1.73333
	28.9667					2.06667
	22.4333					2.4
	28.5667					2.33333
	26.6					3.33333
	22.7333					1.93333
	27.45					2.5
	28.1					3.3
	18.9					1.8
	29.5667					3.2
	29.35					2.8
	30.65					3.1
	24.1333					3.26667
	30.3					1.2
	27.6					2.46667
	31.65					5.6
	23.05					2.2
	30.7					3.53333
	26.6					2.26667
	21.5					2.73333
	31.3					2.2
	24.1					3.4
	22.5					5.33333
	27.9					4.7
	29.65					2.7
	22.1667					1.46667
	25.0333					2.2
	29.95					4.2
	16.9667					2.26667
	33.4					2.5
	24.6667					3.8
	30.5667					1.9
	29.1					4
	36.3667					4.53333
	27.7					4.93333
	33.6					3.7
	24.6667					2.46667
	24.3333					3.93333
	29.4					4.53333
	23.85					2
	35					3.46667
	33.15					5.1
	32.3					5.2
	29.7667					2.2
	26.4667					2.2
	23.3					4.2
	20.8					1.3
	23.9333					3.6
	24.8333					3.2
	26.2					1.8
	30.2					2.53333
	24.8333					2.86667
	29.7					3.4
	21.8333					3.06667
	33.1333					1.6
	30.55					4
	27.1					3.66667
	26.35					1.1
	21.0667					2
	22.6					2.33333
	25.15					1.6
	26.1333					1.93333
	27					2.2
	25.3667					3.13333
	33.3667					3
	31.2					2
	25.6333					4.46667
	25.9					3.2
	31.1					3.5
	32.4					2.86667
	35.1					3.06667
	29.7667					2.8
	28.8333					1.93333
	28.3					1.8
	21.1					3.8
	25.4					3.26667
	18.4667					2.2
	28.0667					3
	27.6					3.7
	26.4					1.5
	21.4					2
	25.9					5
	24.1333					2.2
	25.6333					3.53333
	23.9					2.93333
	17.95					1
	21.8333					1.53333
	25.05					2.2
	31.2667					2.93333
	20.9333					2.73333
	32.2					2.8
	23.45					2.4
	26.5333					2.53333
	23.75					1.1
	27.65					3.2
	22.2333					3.13333
	24.7					2.1
	20.4333					4.46667
	17.85					3.2
	20.7					4.4
	26.8					3.8
	23.3333					2.06667
	18.4667					2.93333
	26.5					3.6
	25.1333					3.4
	21.0667					2.86667
	19.4667					2.53333
	21.15					2.7
	31.4					2
	29.75					2.9
	30.5					1.5
	25					1.8
	19.05					1.6
	24.5					3.6
	29.35					2.7
	21.15					2.8
	18.5					3.6
	23.6333					2.46667
	24.75					2
	28.5					2.53333
	21.2					3.4
	25					3.9
	30.2					3.4
	17.55					1.2
	23.8					2.66667
	21.2					2
	25.1					2
	23.4					3
	24.9					2
	27					2.6
	19					1.9
	26.3333					1.73333
	23.7333					1.33333
	18.0667					1.53333
	22.5					1.8
	19.35					1.4
	23.7333					1.66667
	22.9667					1.93333
	25.5					1.73333
	19.1					1.1
	27.85					4.2
	19.5					1.6
	27.5333					2
	26					1.5
	21.5333					2.33333
	27.95					1.6
	22.2667					1.6
	13.75					2
	21.7					3.9
	24.2					1.8
	17.25					2.5
	18.4					1.2
	21.35					2.1
	22.5333					3.2
	19.55					2.3
	18.6					2
	18.15					0.6
	22					2.2
	22.8333					2.8
	23.15					1.8
	21					3.06667
	22.2					2.1
	28.35					2
	22.2					2.73333
	25.65					2.7
	25.1					4
	24.8667					2.86667
	22.6					2.1
	19.4					1.6
	26.0333					1.66667
	19.85					2.8
	18.1333					3.66667
	24.9					2.1
	19.85					1.3
	28.8					2.1
	22.35					3.2
	21.1					3.06667
	19.9					2.06667
	18.1					2.2
	27					1.9
	22.3333					2.26667
	22.55					2.4
	22.1667					2.93333
	23.25					2.2
	23.5					2.6
	21.1					1.73333
	48.6					2.6
	29.7					3
	23.6					1.46667
	30.8					1.7
	15.85					1.5
	26.35					1.8
	23.45					2.1
	25.3333					1.73333
	21.5					2
	34.1					3.9
	28					1.26667
	25.4667					2.06667
	25.4					1.2
	27.1					2.53333
	40.8667					1.26667
	51.2					1.8
	29.3					1.2
	65.5					5.1
	21.45					1.2
	28.2667					2.86667
	36.3333					2.06667
	42.9					1.73333
	24.3					1.8
	33.2667					1.73333
	52.6					1.3
	32.3667					1.26667
	49.9333					2.33333
	40.1333					1.8
	31.3					3
	31.1					2.6
	29.7					1.7
	36.6					2.3
	29.1333					1.53333
	46.0333					1.8
	62.7					2.93333
	49.2					3.4
	28.9667					2.8
	34.15					2.1
	29.9					1.86667
	26.2					2
	30.2333					2.53333
	36.2					1.8
	56.3					2.1
	42.2333					1
	31.7					0.9
	21.8					2.2
	53.9					4.8
	44.8667					3.06667
	34.25					2.1
	64.9					1.8
	34.4					1.9
	54.9					1.5
	55.1333					1.06667
	29.85					1
	32.85					2.7
	43.55					2.8
	36					1.5
	46.3667					2.6
	30.5667					3.26667
	34.1333					2.4
	28.3					1.2
	35.85					1.2
	32.2					3.1
	25.2333					1.13333
	31.5					1.86667
	22.7					2
	36.0667					1.66667
	54.65					4.3
	36.2					2.4
	47.45					1.7
	38.8667					2.06667
	41.6					4.3
	35.3					1.4
	51.15					1.8
	31.4667					1.46667
	39.75					1.5
	39.1					1.73333
	47.2					2.6
	46.7					2
	27.5333					1.86667
	23.4					1.13333
	35.7					2.1
	35.85					1.8
	44.7					1.5
	35.6667					1.66667
	31.4667					1.4
	35.95					1.8
	42.55					5
	45.75					1.5
	44.7					3
	45.8333					1.86667
	63.1					3.2
	29.3333					3.06667
	35.1333					2.13333
	38.9					2.8
	28.6					1
	45					1.66667
	27.35					1.1
	47.9					1.8
	66.7					1.8
	56.3667					2.73333
	29.8					0.86667
	43.1					3.4
	45.3333					2.2
	47.6333					1.13333
	33.1					1.2
	47.6					1.5
	37.35					1.5
	49.9					4.2
	34.9667					2.86667
	31.9					1.26667
	27.9667					1.66667
	68.55					4
	44.4					2.13333
	34.4333					2.33333
	52.6667					3.66667
	55.5					2.1
	71.0333					5.86667
	35.75					1.6
	55.8333					2.13333
	54.5333					2.8
	27.6667					1.86667
	25.25					1.2
	33.6667					1.13333
	33.8					3.5
	27.7667					1.53333
	53					2.2
	39.85					0.8
	53.8667					3.3
	45.7					1.5
	36.8333					2.2
	47.45					1.3
	28					2.3
	57.05					2
	31.6333					1.73333
	34.1667					2.33333
	29.9333					2.2
	62.5667					1.8
	36.4					2.6
	40.7333					4.13333
	48.9					1.5
	37					1.26667
	50.4					1.6
	35					2.2
	27.1					2
	27.35					4.4
	23.9333					2.4
	39.0667					4.53333
	37					1.26667
	53.5					1.2
	58.65					4
	49.25					2.4
	33.3333					2.4
	47.4					2.86667
	37.1667					2.2
	21.1					1
	20.8667					2.86667
	32.15					3.2
	34.8					1.33333
	42.4					2.46667
	35.7667					4.6
	30.8333					2.6
	45.5333					1.33333
	33.65					4.2
	40.2667					0.93333
	34.7					1.06667
	35.55					3.5
	35					3.33333
	36.25					1.2
	40					3
	26.7333					1.33333
	54.55					2.9
	21.3					1.33333
	24.5333					1.4
	43.5					1.2
	22.95					1.4
	31.3					1.4
	22.45					1.3
	21.7667					1.8
	44.2					1.2
	26.1					1
	29.6					1.73333
	21.75					2.3
	20.8333					1.33333
	27.7667					2.06667
	23.6333					1.5
	26.2					1.4
	32.15					0.8
	25.2					2.66667
	19.2333					2.4
	22.0333					1.8
	29.3667					1.53333
	39.6667					2.86667
	29.2					2.33333
	30.45					1.9
	35.8					2.4
	33.7					2.6
	21.75					1.9
	35.8667					2
	36.1					6.2
	38.8333					3.33333
	42.3					2.3
	21.2					1.4
	25.3333					1
	34.45					3.3
	22.2667					1.86667
	33.65					1.2
	24.45					1
	28.5667					3.06667
	27					2
	58.95					1.7
	23.6					1
	21.5333					3.2
	25.1667					2.06667
	25.7					1.9
	33.2667					1.86667
	43.05					2.3
	22.0667					1.93333
	25.7					2.2
	22.6333					1.4
	19.15					1.9
	25.3333					2.9
	34.35					2.3
	37.75					1
	28.5					4.2
	25.0333					1
	25.9333					2.66667
	27.2					3.3
	23.7333					2
	28.1667					3.5
	23.6					2.6
	32.2333					2.73333
	36.4					1.7
	24.55					2.8
	21.3					2.6
	33.6667					1.53333
	31.3333					5
	29.3					5.4
	33.6					5.26667
	26.4					1.8
	28.9667					1.6
	33.1667					3.4
	24.4					3.2
	23.9					1.5
	24.4667					2.66667
	33.15					3.4
	24.45					2.5
	26.45					2
	26.2667					4.46667
	26.85					1.8
	24.3					1.4
	32.3					1.33333
	33.0667					0.8
	24.8667					1.13333
	26.5333					1.2
	24.75					0.8
	86.1667					0.86667
	33.3					1.53333
	36.2					1.06667
	28.05					1
	23.0333					1.46667
	40.1					0.8
	50.6					1
	53.4333					0.66667
	63					0.93333
	39.6667					1.06667
	27.05					1.6
	18.8					0.7
	31.8333					0.86667
	37.05					1.3
	87.9333					0.73333
	40.9					1.26667
	48.1333					1.53333
	58.3					1
	118.6					2.46667
	62.4					1.6
	37.6667					0.73333
	62.4667					1.53333
	47.2					1.6
	48.45					1.1
	94.7					0.8
	61.5333					0.93333
	71.2					0.8
	71					0.86667
	95.2333					1.66667
	62.3667					0.86667
	90.7667					1.66667
	71.6					1.06667
	25.9667					0.93333
	58.95					0.8
	55.2					1
	64.9333					2.33333
	72					0.9
	113.7					0.93333
	91.9333					1
	70.7667					1.66667
	56.4					1.6
	77.4					1.06667
	38.3333					0.86667
	55.2667					1.13333
	58.8333					1.73333
	37.1667					1.2
	51.0333					1
	21.25					1.3
	71.6333					0.86667
	41.3667					1
	37.15					2
	103.95					1.8
	47.9					0.86667
	69.4667					0.8
	65.6333					1.06667
	30.8667					1.33333
	57.7333					1.8
	35.0333					1.86667
	76					1.73333
	54.1667					1.06667
	71.55					1
	48.6					0.66667
	67.2					1.53333
	78.9667					1.06667
	38.2					1.2
	65.2333					1.53333
	39.0667					2
	90.0333					1.93333
	101.767					1.86667
	44.7					1.4
	48.6333					1.06667
	25.3667					1.33333
	42.65					1
	28					0.8
	33.9333					1.66667
	43.8667					2.33333
	55.9					1.6
	50.4333					1.06667
	57.1667					1.86667
	66.1					1.13333
	42.4333					0.8
	49.5333					0.93333
	38.7					0.86667
	18.0667					0.73333
	38.8					2.2
	27					1.06667
	41.2					0.73333
	48.3					1
	26.95					0.8
	46.2					1.9
	28.6					1.4
	62.8667					0.86667
	56.55					1.3
	57.2333					1.33333
	61.5667					0.86667
	53.3667					1.66667
	23.15					1.5
	47.4333					2.2
	17.95					1.4
	37.95					1
	44.8333					1.53333
	66.0333					0.93333
	99					1.8
	65.1333					1.4
	21.85					1.7
	45.4					1.06667
	20.6					0.6
	44.8					0.7
	37.2					1.1
	45.7333					1
	36.4					1.1
	23.85					1.3
	23.8667					1
	49.9667					1.13333
	35.5					0.93333
	49.45					1
	38.15					1
	31.1667					0.6
	46.1667					1
	52.45					0.9
	47.75					0.8
	46.2					0.73333
	32.85					1.1
	30.3667					1.2
	23.4					1.3
	46.25					0.8
	26.45					1.3
	33.8667					3.06667
	26.3333					1.8
	31					2.6
	39.2					2.2
	49.7667					1.46667
	75.6					2.52333
	40.9667					1.66667
	42.8					1.3
	36					1.4
	28.8667					2.4
	30.7					2.53333
	24.5					3.9
	29.6667					1.73333
	34					1.6
	29.6333					3.13333
	73.7					0.93333
	29.4					1.46667
	31.95					3.5
	19.6333					2.4
	33.6					2.1
	31.4					1.9
	27.5					1.3
	26.4667					1.33333
	43.1					1.4
	52.5333					2.66667
	34.2					1.6
	21.1					1.4
	23.95					3.1
	37.85					3.3
	21.8					2.5
	27.3					1.5
	19.8333					2.26667
	56.5					3.1
	45.5333					2.06667
	48.3					2.8
	35.9					1.2
	34.3333					3.13333
	37					1.8
	20.7667					2
	24.0667					1.06667
	26.6333					2.33333
	38.9					2.4
	26.4333					2.73333
	33.9					2.6
	35.3					1.66667
	32.2333					1.26667
	35.2667					1.26667
	42.6333					2.66667
	34.0333					2.2
	23.2					1.8
	40.4667					3.8
	38.3333					1.7
	33					1.6
	22.7667					1.73333
	34.3					1.4
	29.6333					1.2
	37.3333					3.2
	41.4					4.86667
	40.1667					3.46667
	37.0333					1.8
	39.15					4.1
	27.55					1.5
	32.8667					1.73333
	51.95					4.4
	35.85					1.9
	37.5					4.7
	24.2					1
	32.5333					1.13333
	35.6333					1.9
	37					1.7
	37.8					2.33333
	55.8667					2.06667
	36.6					1.8
	34.7333					1.8
	16.95					1
	36.9333					2.26667
	27					2.5
	41.9667					2.2
	32.2333					2.8
	63.4667					1.26667
	40.9					2.26667
	59.75					3.3
	52.4667					2.73333
	45.9					2.46667
	37.3667					3.46667
	24.8					0.7
	51.9333					2.66667
	29.3					3
	51.2					2.53333
	38.1333					2.6
	40.2					1.8
	35.9					3
	43.8					1.5
	36.4					1.7
	37.5					1.7
	29					2
	25.7					3.1
	38.1333					2.33333
	33.2					1.6
	32.2					2.9
	37.65					1.7
	43.75					1.7
	29.65					1.5
	36.05					1.5
	43.2					4.2
	27.95					1.6
	30.65					1.3
	30.75					2.3
	50					2.4
	35.85					0.9
	20.5667					2.73333
	39.75					2
	32.3					2.4
	33.7					2.4
	30.9667					2
	43.1					2
	31.4					3.9
	32.9					2.9
	32.3					3
	19.3					1.9
	22.4					2.4
	34.05					1.7
	55.6333					1
	35.0667					0.93333
	32.4					1.06667
	41.4					1
	28.75					0.6
	35.1					0.86667
	37.25					1.2
	35.4333					1.4
	24.3333					0.73333
	27.9333					0.66667
	30.3					0.7
	29.0333					0.6
	36.2					0.8
	36.7					1.3
	35.55					0.7
	32.1667					2.2
	35.3					1
	30.55					1.1
	42.3667					1
	37.4					1.2
	17.9					1.8
	34.9					1.33333
	31.3					1.4
	31.2					0.7
	37.55					1.1
	40.8					1
	43					1.2
	29.4					1.2
	29.25					1.6
	29.2667					1.06667
	43.3					1.2
	30.85					0.6
	20.8333					1.46667
	28.5667					1.26667
	17.15					0.8
	33.25					0.8
	28.1					1.9
	39.2					0.7
	32					0.8
	29.3					1.4
	29.7					0.7
	23.65					1.1
	23.05					1.1
	38.0333					0.93333
	33.4333					0.86667
	36.7667					0.93333
	27.7					0.7
	35.4667					0.8
	32.2					0.7
	30.45					1.1
	24					0.7
	34.75					1.4
	34.4					0.7
	38.4					1.8
	41.9					2.3
	23.2					1
	44.9					0.7
	34					0.7
	40.4					1
	41.2					1.33333
	44.0333					1.6
	35.95					1.2
	43					1.26667
	23.7333					1.13333
	44.6					0.7
	35.45					1
	42.2					0.9
	39.4					0.9
	27.95					1.9
	42.5333					1.2
	33.15					0.9
	37.9					1.33333
	30.35					0.8
	31.8					0.86667
	46					1
	23.55					1.4
	36.4					0.8
	25.4					1.8
	29.65					1
	43.9					2.66667
	32.9					1.8
	36.8					1.13333
	40.1333					1
	64					1.8
	45.2667					1.2
	35.8					0.7
	28.9					1.5
	40.3667					0.93333
	36.3					1.33333
	28.2667					0.93333
	34.75					1.3
	31.9					0.9
	38.7					1.4
	38.5					1.1
	35.65					1.6
	35.8					1.2
	27					0.6
	41.7333					1.46667
	27.4					1.2
	30.6667					0.93333
	36.75					1.9
	32.05					2.4
	27.3667					1
	31.1333					1.46667
	33.95					1.3
	34.7					0.9
	29.65					1.8
	37.9333					2.53333
	27.9333					0.86667
	35.8					1.6
	23.1					1.7
	33.8333					1.13333
	34.8667					1.13333
	33.65					0.7
	26.7					1
	34.65					0.9
	25.2333					1.93333
	32.2333					2.13333
	41.2					1.6
	27.8333					0.86667
	27.5					0.8
	36.3					0.93333
	40.6					0.9
	23.1					1.2
	27.2					1.06667
	37.1333					1.06667
	34.4333					2.26667
	30.3667					1.26667
	26.5					0.9
	23.15					0.9
	26.4					1.2
	26.6667					0.93333
	22.4					1
	20.2					1
	22.8					1.2
	29.7667					1.4
	35.1					1.1
	38.2					1.26667
	34.95					1
	26.35					1.2
	37.15					1.2
	23.9333					1
	35.15					1
	23.8					1.1
	75.3					0.73333
	41.8333					0.8
	61.3333					0.8
	44.3					0.8
	47.9333					1
	50.0667					0.93333
	83.7333					0.8
	47.6					0.9
	73.1					0.8
	68.2667					0.93333
	60.1					0.8
	36.8667					0.46667
	51.45					0.8
	71.85					0.6
	72.45					0.9
	37.85					0.9
	66.2					0.8
	69.4					0.7
	42.5333					0.8
	47.8					0.9
	65.6					1
	43.5					0.6
	24.85					0.9
	50.6					0.9
	38.1					0.7
	42.95					0.9
	74.3					0.73333
	25.15					0.6
	47.6333					1.2
	61.8333					0.8
	69.15					0.7
	54.2667					0.93333
	58.05					0.6
	55.9					0.8
	42.9					0.73333
	43.8					0.7
	47.6					0.7
	63.55					0.8
	50.5					1
	59.05					0.7
	60.3					0.8
	38.7333					0.73333
	71.05					0.8
	38.7					1.9
	35.2					2.26667
	42.4667					2
	28.8					1.2
	24.3					1.8
	20.45					2.8
	25.15					1.9
	32.15					3.5
	32.6					1.9
	42.6					2.13333
	35.8					2.33333
	27.9					1.8
	28.15					1.4
	22.45					1.4
	32.9					2.4
	40.6333					2.33333
	45.0667					2.13333
	34.05					1.9
	39.2333					2.26667
	38.0333					2.46667
	67					1.2
	50.8					2.93333
	43.9					1.5
	53.5667					1.26667
	45.0667					1.86667
	61.7667					1.93333
	57.4					1.66667
	40.95					2.1
	28.75					2.1
	38.7					1.53333
	38.3333					2
	55.4					1.73333
	43.0333					1.46667
	40.5667					2.13333
	45.65					2.6
	55.2					1.9
	32.1667					1.53333
	30.4					1.86667
	39.7					1.73333
	39.0333					1.8
	34.7					2.2
	40.3333					1.6
	31.95					1.3
	25.05					2.1
	28.6					1.46667
	34.5					2.6
	47.6667					2
	40.8					2.13333
	35.9					2.4
	49.95					1.3
	44.1					1.86667
	40.2667					2.2
	30.9333					2.46667
	49.55					1.7
	38.5					2.73333
	43.3					1.1
	31.7					2.93333
	26.85					2.1
	31.1667					1.86667
	23.45					1.9
	45.75					1.2
	29.8333					2.33333
	49.4					1.66667
	48.4					2.4
	27.0333					1.46667
	37.0333					2.2
	38.05					1.2
	50.45					1.5
	47.65					0.9
	50.5					1.1
	55.35					1
	42.85					0.9
	52.1333					1.33333
	48.4					1.13333
	52.3					0.93333
	34.9667					0.93333
	42.7667					1.13333
	55.3					1.06667
	30.3667					1.2
	45.7333					1.33333
	38.9333					0.93333
	36.5					0.8
	42.6667					1.46667
	40.9					1
[truncated: 123 more rows]
