# Supplementary material for: Feedback inhibition underlies new computational functions of cerebellar interneurons
Source: eLife. 2022 Dec 8;11:e77603. doi: 10.7554/eLife.77603 (PMC9771357; doi:10.7554/eLife.77603)
Supplement: Figure 4—source data 1. — MLI, molecular layer interneuron; PC, Purkinje cell. [file elife-77603-fig4-data1.xlsx]

## Sheet: figure 4 e,f
	PC/PC-MLI pairs				PC/PC-MLI random
	time range (s)	spike count			time range (s)	spike count
	[-0.4125, -0.375]	0.559			[-0.4125, -0.375]	0.354
	[-0.375, -0.3375]	0.48			[-0.375, -0.3375]	0.453
	[-0.3375, -0.3]	0.367			[-0.3375, -0.3]	0.391
	[-0.3, -0.2625]	0.497			[-0.3, -0.2625]	0.411
	[-0.2625, -0.225]	0.498			[-0.2625, -0.225]	0.478
	[-0.225, -0.1875]	0.452			[-0.225, -0.1875]	0.406
	[-0.1875, -0.15]	0.39			[-0.1875, -0.15]	0.48
	[-0.15, -0.1125]	0.428			[-0.15, -0.1125]	0.387
	[-0.1125, -0.075]	0.47			[-0.1125, -0.075]	0.323
	[-0.075, -0.0375]	0.403			[-0.075, -0.0375]	0.463
	[-0.0375, 0]	0.532			[-0.0375, 0]	0.424
	[0, 0.0375]	0.189			[0, 0.0375]	0.459
	[0.0375, 0.075]	0.225			[0.0375, 0.075]	0.337
	[0.075, 0.1125]	0.326			[0.075, 0.1125]	0.407
	[0.1125, 0.15]	0.299			[0.1125, 0.15]	0.461
	[0.15, 0.0.1875]	0.408			[0.15, 0.0.1875]	0.403
	[0.1875, 0.225]	0.362			[0.1875, 0.225]	0.424
	[0.225, 0.2625]	0.341			[0.225, 0.2625]	0.414
	[0.2625, 0.3]	0.496			[0.2625, 0.3]	0.317
	[0.3, 0.3375]	0.396			[0.3, 0.3375]	0.305
	[0.3375, 0.375]	0.336			[0.3375, 0.375]	0.432
	[0.375, 0.4125]	0.357			[0.375, 0.4125]	0.418
	[0.4125, 0.45]	0.463			[0.4125, 0.45]	0.407
	[0.45, 0.4875]	0.488			[0.45, 0.4875]	0.339
