# Supplementary material for: Feedback inhibition underlies new computational functions of cerebellar interneurons
Source: eLife. 2022 Dec 8;11:e77603. doi: 10.7554/eLife.77603 (PMC9771357; doi:10.7554/eLife.77603)
Supplement: Figure 7—figure supplement 1—source data 1. — MLI, molecular layer interneuron; PC, Purkinje cell. [file elife-77603-fig7-figsupp1-data1.xlsx]

## Sheet: Figure 6a Eyelid positio
Eyelid position sorted by CR onset
ISI 250	units in mm												ISI 500													ISI 700
nonCRs	Mean	S.D.	Early CRs	Mean	S.D.	Mid CRs	Mean	S.D.	Late CRs	Mean	S.D.		nonCRs	Mean	S.D.	Early CRs	Mean	S.D.	Mid CRs	Mean	S.D.	Late CRs	Mean	S.D.		nonCRs	Mean	S.D	Early CRs	Mean	S.D.	Mid CRs	Mean	S.D.	Late CRs	Mean	S.D.
1 ms	0.0193792	0.0148858		0.273577	0.366099		0.074401	0.15143		0.0573204	0.257828			0.119932	0.173755		0.0608889	0.0839461		0.0639591	0.0699899		0.0858285	0.110714			0.0829889	0.112064		0.0579405	0.0678621		0.050662	0.0274644		0.057154	0.0560354
2 ms	0.0194686	0.0148047		0.273498	0.365946		0.0744575	0.151361		0.0574297	0.257796			0.120265	0.172752		0.0611751	0.0842545		0.0641789	0.0698428		0.0857808	0.110539			0.0828363	0.112442		0.0579039	0.0675144		0.050429	0.0271089		0.0568878	0.0569156
3 ms	0.0199119	0.0151662		0.273212	0.36597		0.0745002	0.151347		0.0574199	0.257777			0.118747	0.173065		0.061368	0.0846169		0.0642542	0.0698032		0.085666	0.110418			0.0835614	0.112589		0.0576781	0.0681176		0.0505813	0.0279177		0.0565115	0.0575206
4 ms	0.020088	0.0149137		0.273141	0.365882		0.074526	0.151253		0.0575342	0.257772			0.118767	0.173368		0.0613179	0.0845899		0.0643127	0.0697549		0.0854299	0.110645			0.0827851	0.112032		0.0566091	0.0674286		0.0499814	0.0269763		0.0572056	0.0568959
5 ms	0.020343	0.0147823		0.273062	0.365905		0.074545	0.151196		0.0575265	0.257757			0.118977	0.173693		0.0614402	0.0844679		0.0641172	0.0697681		0.0848017	0.11064			0.0823543	0.112369		0.0564908	0.0675241		0.0500729	0.0273868		0.0571588	0.0568372
6 ms	0.0211958	0.0156107		0.273021	0.365936		0.0746029	0.151224		0.0575148	0.257781			0.11919	0.174		0.0615605	0.0849671		0.0639727	0.0697501		0.0845041	0.11051			0.0835074	0.112134		0.0560571	0.0677037		0.0504328	0.0274971		0.0571058	0.0569443
7 ms	0.0212293	0.0155186		0.272853	0.366068		0.0748004	0.151282		0.0575624	0.257791			0.119133	0.174632		0.0616878	0.0854602		0.063841	0.0695345		0.0843052	0.110245			0.083685	0.112075		0.0560189	0.067667		0.0501245	0.0276172		0.0573062	0.0567809
8 ms	0.0214644	0.0154294		0.272876	0.366151		0.0748313	0.151302		0.057619	0.257814			0.119053	0.175646		0.0611895	0.0855172		0.0636486	0.0694907		0.0844465	0.110394			0.08322	0.112627		0.0556895	0.0678406		0.0506119	0.0275298		0.0574823	0.0571854
9 ms	0.0216509	0.0156938		0.273014	0.366138		0.0750465	0.151305		0.0576071	0.257806			0.118444	0.17649		0.0606714	0.0853524		0.063812	0.0694208		0.0843631	0.110263			0.0834283	0.112497		0.0559372	0.0678831		0.0513389	0.0275079		0.0573105	0.056646
10 ms	0.0212079	0.0153135		0.273027	0.366128		0.0749942	0.151357		0.0575647	0.257821			0.118874	0.176503		0.0605725	0.08513		0.0636456	0.0692929		0.0841092	0.110117			0.0828154	0.112316		0.0556909	0.0670808		0.051109	0.0273992		0.057034	0.0562767
11 ms	0.0210491	0.0156523		0.272863	0.366173		0.0749414	0.151361		0.0575088	0.257821			0.118927	0.176535		0.0605537	0.0850215		0.0635624	0.0690676		0.0840447	0.110046			0.0835834	0.110743		0.0566367	0.066081		0.051024	0.0274586		0.0571099	0.0564407
12 ms	0.0203779	0.0151407		0.272718	0.366248		0.0748789	0.151351		0.0573948	0.257853			0.119182	0.176492		0.0603063	0.0847761		0.0639141	0.0691591		0.0839315	0.109996			0.0845576	0.109432		0.0565043	0.0649261		0.0506168	0.0270906		0.0570644	0.0565054
13 ms	0.019833	0.0151132		0.2727	0.366179		0.0749843	0.151328		0.0573013	0.257876			0.118524	0.176257		0.0598415	0.0843184		0.0638762	0.0690455		0.0839781	0.10958			0.0831484	0.109122		0.0569738	0.0642106		0.0505017	0.0269094		0.0571814	0.0563052
14 ms	0.0196068	0.0154005		0.272745	0.36604		0.0748299	0.151328		0.0571758	0.257885			0.117967	0.175783		0.0596897	0.0838929		0.0637482	0.0690725		0.0839447	0.109841			0.0818257	0.108925		0.0570698	0.0635085		0.0505353	0.0262578		0.0567898	0.0566361
15 ms	0.0190282	0.0155366		0.2729	0.365753		0.0747879	0.151374		0.0570018	0.257875			0.117606	0.175364		0.0599391	0.0839643		0.0634423	0.0686589		0.0843019	0.110192			0.0820026	0.108065		0.0570363	0.0623915		0.0502381	0.026017		0.0563264	0.0566122
16 ms	0.0185336	0.0154825		0.272953	0.365502		0.0745836	0.151363		0.0569533	0.257872			0.117646	0.174688		0.0602674	0.084027		0.0634605	0.0687917		0.0845197	0.110345			0.0813626	0.107016		0.056828	0.06193		0.0497972	0.026425		0.0569417	0.0561456
17 ms	0.0184608	0.0159428		0.273186	0.365165		0.0745149	0.151259		0.0570813	0.257858			0.117445	0.174402		0.0605515	0.0838867		0.0635058	0.0688345		0.0848008	0.110335			0.0810045	0.106089		0.0576396	0.0611368		0.0501343	0.0261615		0.0576338	0.0560254
18 ms	0.0186854	0.0160885		0.273201	0.365009		0.0745938	0.151227		0.0571178	0.257853			0.117634	0.174228		0.060645	0.0840787		0.0631593	0.068767		0.0849358	0.110069			0.0800168	0.106733		0.0570413	0.0617449		0.0500588	0.0270812		0.0577465	0.055651
19 ms	0.0188073	0.0158439		0.273118	0.364942		0.074722	0.151174		0.0572744	0.257811			0.117449	0.173887		0.0608778	0.0840927		0.0628661	0.0686688		0.0849888	0.110402			0.0794365	0.107119		0.0571767	0.061739		0.0499596	0.0273927		0.057878	0.0558032
20 ms	0.0189381	0.0154002		0.273132	0.364749		0.0745867	0.151113		0.0573753	0.257771			0.117811	0.173735		0.0609664	0.0835957		0.0628918	0.0685607		0.0853787	0.111294			0.0794261	0.106484		0.0572813	0.0607655		0.0499874	0.0269718		0.0570756	0.0561946
21 ms	0.0191671	0.0152592		0.273019	0.364631		0.0746991	0.151108		0.0574592	0.257748			0.117961	0.172808		0.0607262	0.0830598		0.0628595	0.0685262		0.085542	0.111438			0.080015	0.106058		0.0569342	0.0606859		0.0499367	0.0270538		0.057328	0.0564195
22 ms	0.019755	0.0154258		0.272767	0.364645		0.0747118	0.151089		0.0575948	0.257723			0.118114	0.171904		0.0602548	0.0823564		0.0633152	0.0688429		0.0850295	0.11106			0.0809071	0.104776		0.0564535	0.0604274		0.0506951	0.0269622		0.0579936	0.0559861
23 ms	0.0201987	0.0152955		0.272486	0.364883		0.0747197	0.151192		0.0576363	0.257707			0.118049	0.172338		0.0599492	0.0821174		0.0633618	0.069019		0.0850744	0.11143			0.0808708	0.103871		0.0559151	0.0593193		0.0509446	0.0263367		0.0575505	0.0559012
24 ms	0.0205043	0.0151464		0.272584	0.364872		0.0747321	0.15124		0.0576424	0.257693			0.119081	0.171757		0.0595686	0.0818416		0.0632046	0.0688803		0.0850532	0.111677			0.0819316	0.103641		0.0551359	0.0593123		0.0503807	0.0262673		0.0577036	0.0560071
25 ms	0.020271	0.014582		0.272517	0.365026		0.0746961	0.151323		0.057594	0.257687			0.118674	0.17217		0.0589602	0.0815071		0.0633888	0.0693669		0.0851647	0.11244			0.0817949	0.103366		0.0554891	0.0584833		0.0500246	0.0256192		0.0576747	0.0564228
26 ms	0.0205345	0.0149426		0.272795	0.364891		0.0746123	0.151419		0.0575978	0.257692			0.118518	0.172441		0.0588488	0.0811897		0.0635564	0.0695101		0.0853648	0.11272			0.082112	0.102838		0.0554992	0.0580633		0.0501909	0.0253044		0.0574047	0.0561546
27 ms	0.0205565	0.0148807		0.272534	0.365077		0.074561	0.151564		0.0576011	0.257687			0.118465	0.172449		0.0591515	0.0816316		0.0634458	0.0694753		0.0855111	0.112475			0.0824864	0.101853		0.0548984	0.057938		0.0496469	0.0258552		0.0580226	0.0554796
28 ms	0.0202252	0.0146629		0.272706	0.364962		0.0746361	0.151488		0.0575437	0.2577			0.118488	0.17243		0.0593539	0.0818022		0.0636065	0.0692024		0.0854507	0.112526			0.0824755	0.101248		0.0553689	0.0576415		0.0500736	0.0257626		0.0570556	0.0552226
29 ms	0.0196218	0.0140733		0.272807	0.364881		0.0747709	0.151391		0.0574468	0.257717			0.118912	0.173229		0.0596712	0.0821875		0.0632817	0.068939		0.0855582	0.112727			0.08174	0.101224		0.0556439	0.0575052		0.0496793	0.0259844		0.0572428	0.0554187
30 ms	0.0194329	0.0145829		0.273019	0.364595		0.0748469	0.151273		0.0573875	0.257729			0.118636	0.17317		0.0596965	0.0820672		0.0634494	0.0688635		0.0851239	0.112749			0.0824888	0.102072		0.0557933	0.0577625		0.0492764	0.0259193		0.0575527	0.0561199
31 ms	0.019322	0.0147715		0.272809	0.364591		0.0749528	0.151261		0.0572688	0.257728			0.117825	0.173021		0.0597383	0.0824335		0.0634546	0.068833		0.0851432	0.112326			0.0816382	0.102205		0.0558661	0.0580422		0.0496562	0.0258508		0.0568426	0.056034
32 ms	0.0192567	0.0151257		0.272808	0.364406		0.0748365	0.151219		0.0573496	0.257688			0.118107	0.173178		0.0598132	0.0828432		0.0635823	0.0686055		0.0854158	0.112201			0.0822062	0.102461		0.0555371	0.0582889		0.0499293	0.0259905		0.0559838	0.056604
33 ms	0.0190369	0.0152009		0.272794	0.364184		0.0746832	0.151222		0.0572715	0.25766			0.118546	0.173233		0.0598353	0.0833296		0.0636108	0.0680425		0.0851693	0.111959			0.0824561	0.103118		0.0557003	0.059057		0.0499864	0.026377		0.0561841	0.0566037
34 ms	0.0189218	0.0156282		0.273015	0.363849		0.0747808	0.151139		0.0573547	0.257637			0.118214	0.172698		0.0598373	0.0832932		0.063612	0.0677262		0.0850075	0.111983			0.082539	0.103709		0.0557688	0.0591065		0.0503047	0.0263707		0.056443	0.0569836
35 ms	0.0189931	0.0153863		0.273035	0.363752		0.0746556	0.151171		0.0573826	0.257609			0.117801	0.173647		0.0596483	0.0835042		0.06341	0.0679123		0.0851585	0.112258			0.0825905	0.104218		0.0556121	0.0590807		0.0498804	0.0259154		0.0574036	0.0573276
36 ms	0.0193577	0.0156211		0.272973	0.363682		0.0745097	0.151216		0.0574734	0.257577			0.118036	0.173254		0.0595532	0.0836064		0.0634362	0.0679693		0.0850686	0.112601			0.0827907	0.105283		0.0555297	0.059045		0.0498484	0.0255819		0.0572417	0.0578515
37 ms	0.0193065	0.015127		0.273005	0.363555		0.0745063	0.151281		0.0575512	0.257554			0.118729	0.172593		0.0596299	0.0840923		0.0631221	0.0675101		0.0852218	0.112531			0.082162	0.105866		0.0560435	0.0596418		0.0503244	0.0254974		0.0574167	0.0578067
38 ms	0.0195982	0.015157		0.273022	0.363441		0.0743863	0.151318		0.0577232	0.257526			0.118301	0.173041		0.0593666	0.0840396		0.0633254	0.0676383		0.0851215	0.112882			0.0824455	0.105859		0.0560888	0.0592704		0.0501292	0.0256443		0.0572792	0.0582564
39 ms	0.0200582	0.0153147		0.273135	0.363219		0.074553	0.151335		0.0578308	0.257522			0.118594	0.171939		0.0596277	0.084021		0.0630396	0.0677098		0.0847747	0.112461			0.082613	0.105073		0.0566291	0.0593217		0.0505513	0.0255199		0.0574871	0.0580928
40 ms	0.020203	0.0149076		0.272993	0.363294		0.0748032	0.151378		0.0578809	0.257509			0.118206	0.172038		0.0596859	0.083929		0.062904	0.068122		0.0850584	0.112159			0.0827117	0.104811		0.0568093	0.0588941		0.0507309	0.02554		0.0574496	0.0582654
41 ms	0.0204262	0.0145499		0.273184	0.363152		0.0747829	0.151401		0.057912	0.257499			0.119112	0.172683		0.0594752	0.0838705		0.063224	0.0682753		0.0849123	0.11197			0.0825143	0.106395		0.0569406	0.0605763		0.0502843	0.0255255		0.0573982	0.0584492
42 ms	0.0207703	0.0146703		0.272981	0.363268		0.0747602	0.151456		0.0579444	0.257473			0.119949	0.172718		0.0595487	0.0842974		0.0632484	0.0680182		0.0847774	0.111726			0.0830817	0.106873		0.0570784	0.0613284		0.0505245	0.0264455		0.0573032	0.0582915
43 ms	0.0213708	0.0151588		0.272942	0.36323		0.0747477	0.151599		0.0579436	0.257481			0.119521	0.173151		0.0595148	0.0849547		0.0633244	0.0677586		0.0846485	0.111432			0.0822399	0.107525		0.0573362	0.0624901		0.0502618	0.0266		0.056719	0.0579945
44 ms	0.021276	0.0149915		0.272655	0.36324		0.0748068	0.15161		0.0579079	0.257457			0.119687	0.174073		0.0595161	0.0855354		0.0628656	0.0676836		0.0845812	0.111407			0.0825489	0.107763		0.0569503	0.0627924		0.0501862	0.026573		0.0565792	0.057797
45 ms	0.0209369	0.0146721		0.272579	0.36313		0.074894	0.151625		0.0577338	0.257482			0.120204	0.17457		0.059703	0.085854		0.0628284	0.0675496		0.0847762	0.111429			0.0822404	0.10922		0.0570125	0.0639324		0.0501067	0.026752		0.0571583	0.0578383
46 ms	0.0207077	0.0149798		0.272403	0.363147		0.0749777	0.151622		0.0577153	0.257496			0.119896	0.175049		0.0599434	0.086195		0.0630865	0.0674329		0.0846864	0.111306			0.0828712	0.110789		0.056564	0.065316		0.0502609	0.0266107		0.0574062	0.0574657
47 ms	0.0202867	0.0149739		0.272532	0.36294		0.0747457	0.151617		0.0576478	0.257528			0.120912	0.174704		0.0596278	0.0862621		0.0629186	0.0670699		0.0847383	0.111481			0.0827816	0.112544		0.0562509	0.0668793		0.0502037	0.026303		0.0569786	0.0577561
48 ms	0.0200787	0.0154395		0.272176	0.36299		0.0747334	0.151652		0.0575184	0.257523			0.120297	0.174178		0.0596878	0.0863622		0.0626506	0.0671029		0.0847978	0.111517			0.0830968	0.112119		0.0566651	0.0672086		0.0505078	0.0263935		0.0568221	0.0574801
49 ms	0.0197818	0.0154006		0.272289	0.362637		0.0748166	0.151679		0.0575416	0.257535			0.120379	0.174214		0.0596104	0.086747		0.062537	0.0667921		0.084863	0.111642			0.0830404	0.112763		0.0567578	0.0678215		0.0497679	0.0262071		0.0564284	0.0576335
50 ms	0.0194858	0.0154935		0.272433	0.362349		0.0750021	0.151589		0.0575801	0.257529			0.121045	0.174322		0.0597385	0.087151		0.0624511	0.0668001		0.0852523	0.111972			0.0846903	0.113502		0.0572749	0.0688781		0.0500382	0.0260214		0.0567731	0.0576285
51 ms	0.0198151	0.0161638		0.272407	0.36229		0.0750462	0.151541		0.0576132	0.25755			0.120028	0.174053		0.060091	0.0874094		0.0625606	0.0666401		0.0851557	0.112284			0.0847911	0.114595		0.0570076	0.0701945		0.0492592	0.0254319		0.0567461	0.0578226
52 ms	0.0198478	0.0162695		0.272494	0.362149		0.074893	0.151479		0.0576459	0.257554			0.12063	0.173962		0.0599819	0.0875295		0.0625341	0.0665322		0.0848952	0.112278			0.0856878	0.114033		0.0569082	0.0703935		0.0491087	0.0255544		0.0569712	0.0572273
53 ms	0.0202957	0.016836		0.272664	0.361946		0.0748281	0.151564		0.0576838	0.257565			0.120917	0.174576		0.0596908	0.0877311		0.0622555	0.0666769		0.0849698	0.112848			0.0852282	0.113934		0.0570989	0.0702922		0.0486373	0.0254312		0.0572808	0.057263
54 ms	0.0207233	0.0168104		0.272446	0.361906		0.0749899	0.15152		0.0577022	0.257561			0.119388	0.174126		0.0599027	0.0878286		0.062194	0.0664458		0.0848733	0.113132			0.0852049	0.113984		0.0570242	0.0704621		0.0487232	0.0254742		0.0577627	0.0575172
55 ms	0.0214792	0.0169941		0.2726	0.361633		0.0749902	0.151536		0.0578681	0.257569			0.119979	0.175086		0.0602337	0.0888165		0.0622204	0.0662232		0.0849131	0.113351			0.0853837	0.114352		0.0569682	0.0709451		0.0488071	0.0257408		0.0576684	0.0574524
56 ms	0.0219901	0.0174673		0.272387	0.361675		0.0749226	0.151562		0.0579301	0.257584			0.119809	0.175241		0.0605443	0.0890167		0.0620918	0.0664587		0.0848413	0.113204			0.08501	0.114469		0.0565504	0.0715499		0.0491121	0.0260901		0.0580889	0.0567144
57 ms	0.0221716	0.0172362		0.272288	0.361784		0.0747269	0.151642		0.0579017	0.257587			0.11929	0.17455		0.0606034	0.0890127		0.0617933	0.0666346		0.0846186	0.112848			0.0835393	0.114052		0.0559398	0.0711929		0.0494755	0.0264282		0.0580013	0.0561999
58 ms	0.0224216	0.016887		0.27224	0.36182		0.0745244	0.151703		0.0580109	0.257601			0.120185	0.174178		0.0603671	0.0886669		0.061843	0.0666871		0.0849323	0.112688			0.0831457	0.11274		0.0560654	0.0699107		0.0500357	0.0262298		0.0578081	0.0559012
59 ms	0.0231785	0.0180447		0.272326	0.361815		0.0745868	0.151799		0.0580257	0.257599			0.119695	0.174393		0.0603406	0.0888149		0.0614904	0.0665536		0.0851086	0.113044			0.0831106	0.112974		0.0560452	0.0702049		0.050065	0.0262023		0.0580588	0.0561847
60 ms	0.0229322	0.0177478		0.272347	0.361771		0.074523	0.151813		0.0579863	0.257599			0.119111	0.173317		0.0606117	0.0886197		0.0615173	0.0664803		0.085041	0.113186			0.083646	0.112702		0.0560355	0.0703898		0.050068	0.0264313		0.0585685	0.0557328
61 ms	0.0230086	0.018196		0.272445	0.361633		0.0743915	0.151801		0.058059	0.257613			0.118683	0.17433		0.060554	0.0892472		0.0616347	0.0666003		0.0849275	0.11305			0.0839125	0.1121		0.056128	0.0695863		0.0500834	0.0266427		0.0587246	0.0554757
62 ms	0.0226953	0.0187436		0.272479	0.361586		0.074392	0.151777		0.0579494	0.257662			0.117528	0.174003		0.060412	0.0891523		0.0616469	0.0664083		0.085062	0.113053			0.0839178	0.111766		0.0559169	0.0690734		0.0502877	0.0264291		0.0590033	0.0559386
63 ms	0.0224752	0.0190434		0.272606	0.361575		0.07424	0.151721		0.0579192	0.257703			0.117357	0.174306		0.0598824	0.0888493		0.0619912	0.0663798		0.0850502	0.113036			0.0844373	0.11188		0.0555678	0.0691395		0.0499423	0.0259366		0.0593502	0.0560302
64 ms	0.0222877	0.0193658		0.272691	0.361427		0.0743521	0.151684		0.0578657	0.257727			0.117595	0.174315		0.059448	0.0888649		0.0620752	0.0661848		0.0849495	0.113121			0.0853044	0.112245		0.0558082	0.0693897		0.049942	0.0255357		0.0597165	0.0561802
65 ms	0.0220414	0.0199452		0.272868	0.36116		0.0744768	0.151702		0.0577384	0.257738			0.117339	0.174682		0.0595308	0.0892852		0.0620275	0.0660346		0.084667	0.112864			0.0859742	0.112814		0.0569215	0.070147		0.050052	0.0256833		0.0600898	0.0563987
66 ms	0.021609	0.01994		0.272765	0.36108		0.0745336	0.151629		0.0577951	0.257734			0.117183	0.174018		0.0593668	0.0894877		0.0622194	0.065593		0.0845277	0.112515			0.0857826	0.11317		0.0572086	0.0705235		0.0501853	0.0254315		0.0596607	0.056215
67 ms	0.0217906	0.0204183		0.272912	0.360853		0.0745439	0.151579		0.0576985	0.257748			0.1177	0.175335		0.0595075	0.0902379		0.0622204	0.0656144		0.0847979	0.112392			0.0862273	0.112965		0.0571367	0.0706829		0.0506782	0.0257274		0.0587027	0.0568233
68 ms	0.0219583	0.0210694		0.272754	0.360875		0.0745153	0.151649		0.0578152	0.257734			0.118729	0.174634		0.0594143	0.0901122		0.0622565	0.0654608		0.0850112	0.112526			0.0861497	0.112952		0.0579033	0.0716281		0.0505521	0.0256762		0.05867	0.0559511
69 ms	0.0222729	0.0213411		0.272692	0.360857		0.0744703	0.151647		0.0578336	0.257703			0.118669	0.17502		0.0596388	0.0905464		0.0622713	0.0659532		0.0846767	0.112378			0.0861508	0.113623		0.0577829	0.0720984		0.0504648	0.0255949		0.0585655	0.0555332
70 ms	0.0222547	0.0212356		0.272584	0.360692		0.0747298	0.15168		0.0579029	0.257634			0.118968	0.175201		0.0600828	0.0911195		0.061889	0.0660825		0.084714	0.112483			0.0858646	0.113234		0.0577788	0.0722468		0.0511876	0.0256578		0.0575359	0.0556688
71 ms	0.0229233	0.0224139		0.272446	0.360581		0.0747298	0.151626		0.0579918	0.25762			0.118797	0.175996		0.0607224	0.0920162		0.0619461	0.0659372		0.0851676	0.112339			0.0854739	0.112686		0.0575172	0.0722402		0.0503929	0.025232		0.0567603	0.0557239
72 ms	0.0232602	0.022255		0.272478	0.360528		0.0746458	0.151552		0.0580299	0.257608			0.119206	0.175891		0.0608897	0.0926071		0.0621192	0.0659245		0.0854346	0.112406			0.0860762	0.113603		0.0569502	0.073163		0.0501366	0.0252425		0.0569277	0.0555238
73 ms	0.0237821	0.0226069		0.272321	0.360476		0.074764	0.151588		0.058056	0.257594			0.119289	0.177168		0.0613437	0.0936059		0.0617571	0.0662088		0.0856358	0.1125			0.0863634	0.113504		0.0568075	0.0733209		0.0503441	0.0252241		0.0572043	0.0551595
74 ms	0.024672	0.0236452		0.272011	0.360604		0.074837	0.151518		0.0581301	0.257585			0.119799	0.177651		0.0614068	0.0942133		0.0617202	0.0657539		0.0853724	0.112394			0.0853541	0.115041		0.0572059	0.0743903		0.050274	0.0252953		0.0577356	0.0548635
75 ms	0.0247042	0.0236259		0.272157	0.360634		0.0747564	0.151486		0.0580435	0.25759			0.119816	0.178521		0.0618542	0.0951454		0.0616413	0.0655359		0.0851285	0.112377			0.084702	0.116441		0.0563598	0.0754441		0.0498934	0.0248357		0.057736	0.0550752
76 ms	0.0247284	0.0238381		0.272104	0.360696		0.0749576	0.151497		0.0579879	0.257583			0.120671	0.178528		0.0616471	0.0956135		0.0616447	0.0654382		0.0854271	0.112378			0.0852065	0.116709		0.0567515	0.0762089		0.0498868	0.0248029		0.0576562	0.054595
77 ms	0.025327	0.025192		0.272225	0.360655		0.0748217	0.151476		0.0579248	0.257617			0.120553	0.178174		0.0615444	0.095908		0.0619449	0.065396		0.0852838	0.112381			0.0853584	0.117387		0.0575488	0.0769435		0.0499221	0.0243097		0.0580699	0.0540212
78 ms	0.0248497	0.0252468		0.272182	0.360619		0.0749025	0.151449		0.057794	0.257639			0.120373	0.178192		0.0616684	0.096241		0.0619977	0.0652026		0.085009	0.112435			0.0859975	0.11783		0.0579552	0.077642		0.0500258	0.0249112		0.0585769	0.0534048
79 ms	0.0246199	0.0257293		0.271815	0.360753		0.0748845	0.151443		0.0577824	0.257635			0.120495	0.179348		0.0615995	0.0965411		0.0621075	0.0648122		0.0850476	0.112593			0.0847579	0.118324		0.0577741	0.0784416		0.0500904	0.0250168		0.0576628	0.0529818
80 ms	0.0245686	0.0265939		0.27193	0.360672		0.0748069	0.151378		0.0577597	0.257653			0.120714	0.179397		0.0615706	0.0968838		0.06269	0.064852		0.0849765	0.112447			0.0847125	0.119147		0.0576065	0.0791221		0.0498961	0.0254156		0.0577805	0.0527308
81 ms	0.0237572	0.0265409		0.271963	0.360572		0.0746866	0.151433		0.0576684	0.257642			0.120013	0.178761		0.0612293	0.0969659		0.062661	0.0649073		0.0853731	0.112304			0.0848128	0.118951		0.0564785	0.0791949		0.0495151	0.0257009		0.0576168	0.0523122
82 ms	0.0235297	0.0268425		0.271752	0.360393		0.0749624	0.151437		0.0576682	0.257603			0.119721	0.179268		0.0608009	0.0970843		0.062296	0.0647812		0.0853877	0.112037			0.0846856	0.118664		0.0567267	0.0790184		0.0496703	0.0263959		0.0575298	0.052259
83 ms	0.0234581	0.0274126		0.271788	0.360119		0.0749473	0.151447		0.0577995	0.257591			0.120343	0.179833		0.0610959	0.0974139		0.0623946	0.0647644		0.0849481	0.111966			0.0850247	0.118715		0.0571501	0.0795224		0.0498499	0.0265854		0.0577561	0.0519398
84 ms	0.0228619	0.027377		0.271691	0.360046		0.0749853	0.151473		0.0577244	0.257545			0.120073	0.181054		0.0614232	0.0981374		0.0620199	0.0644969		0.0849361	0.111535			0.0852452	0.119379		0.0566737	0.0804423		0.0500886	0.0264033		0.0578531	0.0519071
85 ms	0.0230958	0.0279606		0.271532	0.359984		0.0748044	0.151503		0.0578561	0.257494			0.120398	0.181615		0.0611821	0.0984358		0.0618154	0.0641833		0.0853355	0.111253			0.085381	0.120158		0.0569112	0.0810457		0.0507647	0.0264326		0.058237	0.0522242
86 ms	0.0234674	0.0285752		0.271586	0.35976		0.0749218	0.151541		0.0579922	0.257465			0.119658	0.180423		0.0611228	0.0984175		0.0617842	0.0643971		0.0854561	0.111253			0.0862655	0.120473		0.0571218	0.0817677		0.0509116	0.0265251		0.0589331	0.0513998
87 ms	0.0237696	0.0289361		0.271395	0.35974		0.0749544	0.151573		0.0580584	0.257417			0.119931	0.180915		0.0613187	0.0988275		0.0614139	0.064018		0.085516	0.111397			0.086032	0.120963		0.0573161	0.0827611		0.051131	0.0261876		0.0582103	0.0512801
88 ms	0.0243955	0.0293952		0.271079	0.359748		0.0751207	0.151512		0.0581889	0.257368			0.120116	0.181284		0.0617391	0.0991796		0.0613582	0.0639724		0.0851841	0.111111			0.0861467	0.121136		0.0582322	0.0831291		0.0511042	0.0265855		0.0582175	0.0510144
89 ms	0.0252592	0.0303106		0.271043	0.359698		0.075204	0.151406		0.0583058	0.257345			0.120286	0.180922		0.0623389	0.0997944		0.0618473	0.0641355		0.08509	0.110952			0.0866699	0.121486		0.0586133	0.0839315		0.0511981	0.0267937		0.0578296	0.0505998
90 ms	0.0257622	0.031138		0.271034	0.359766		0.0751383	0.151351		0.0582916	0.2573			0.119253	0.181211		0.0622448	0.100046		0.0616836	0.0641369		0.0855543	0.110905			0.0863352	0.122669		0.0577883	0.0848079		0.0501861	0.0266547		0.0577304	0.050547
91 ms	0.0265461	0.031578		0.271118	0.359701		0.0752236	0.15126		0.0584108	0.257259			0.120402	0.181255		0.0621158	0.100448		0.0620199	0.0641551		0.0855896	0.111056			0.0855369	0.123261		0.0584243	0.0849699		0.0495728	0.0272136		0.0579118	0.0510204
92 ms	0.0268147	0.0319207		0.271425	0.359571		0.0753259	0.151252		0.0584181	0.257233			0.120066	0.182019		0.0622356	0.101237		0.0618596	0.0643612		0.0851243	0.111361			0.0851497	0.123411		0.0581325	0.0854429		0.0490785	0.0274332		0.0575014	0.050965
93 ms	0.0269079	0.0327536		0.271681	0.359498		0.0752436	0.151205		0.0582762	0.257219			0.120411	0.183555		0.0623976	0.102121		0.0617429	0.0646653		0.0849887	0.111329			0.0854825	0.123716		0.0578796	0.0856882		0.0491231	0.0266869		0.0577833	0.0513233
94 ms	0.0268643	0.0333651		0.271884	0.359383		0.0752451	0.15117		0.0582153	0.25722			0.12085	0.184248		0.0624894	0.102533		0.0620004	0.0649993		0.0850372	0.111104			0.0856815	0.123735		0.0576344	0.0861616		0.0487897	0.0266961		0.0580913	0.0508636
95 ms	0.0266686	0.0340961		0.27215	0.359266		0.075168	0.151199		0.0581598	0.257235			0.120592	0.186138		0.0622399	0.103327		0.0620229	0.0650451		0.0850088	0.111471			0.0856397	0.124707		0.0579347	0.0871294		0.049353	0.0256566		0.0582164	0.0510058
96 ms	0.0261598	0.0342052		0.272199	0.359258		0.0750003	0.151272		0.0580533	0.257261			0.120658	0.187357		0.0621645	0.10415		0.0619988	0.0648982		0.0849971	0.111429			0.0850778	0.124771		0.0579491	0.0872648		0.0488426	0.0255564		0.0578754	0.0508124
97 ms	0.0259306	0.0347225		0.272211	0.359142		0.0749967	0.15133		0.0579199	0.257279			0.120822	0.18891		0.0623034	0.105061		0.0621644	0.0650478		0.0849028	0.111433			0.084346	0.124605		0.0578235	0.0873918		0.0495727	0.0254024		0.0575714	0.0502873
98 ms	0.0253234	0.035141		0.272139	0.35904		0.0749038	0.151338		0.057922	0.257292			0.120252	0.19015		0.0623822	0.105746		0.0623111	0.0651317		0.0851734	0.111651			0.0844125	0.124489		0.0576997	0.087786		0.0495649	0.0255062		0.0573098	0.0492934
99 ms	0.0251321	0.0356418		0.271931	0.358949		0.0748503	0.151369		0.0578049	0.257305			0.120639	0.191652		0.0621994	0.106566		0.062744	0.0651786		0.085572	0.111657			0.0841567	0.124834		0.0571682	0.0879146		0.0493027	0.0250047		0.0572617	0.0490085
100 ms	0.0253449	0.0361451		0.271894	0.358779		0.0749941	0.151424		0.057865	0.257299			0.120642	0.193055		0.0620844	0.107432		0.0625025	0.0645177		0.0857838	0.111283			0.0831148	0.124847		0.0570783	0.0883165		0.0495307	0.0257285		0.0568707	0.048462
101 ms	0.0253025	0.0359343		0.271733	0.358753		0.0750828	0.15145		0.0578874	0.257277			0.119609	0.194666		0.062184	0.108318		0.0623389	0.0643777		0.085837	0.111169			0.082918	0.124699		0.0575696	0.0877935		0.050149	0.0255093		0.0568915	0.0486074
102 ms	0.0255379	0.0364173		0.271821	0.358608		0.0751613	0.151428		0.0579641	0.257244			0.120379	0.195635		0.0622181	0.108818		0.062609	0.0644202		0.0861486	0.110967			0.0826713	0.12499		0.058126	0.0878558		0.0498983	0.0252681		0.0559737	0.0479962
103 ms	0.0257176	0.0367322		0.27173	0.358561		0.07504	0.15142		0.0579083	0.257208			0.120846	0.197497		0.0622575	0.109365		0.0626696	0.0648308		0.0863195	0.111311			0.0829818	0.125809		0.0581415	0.0885339		0.0505067	0.0252584		0.0563992	0.048086
104 ms	0.0260247	0.0366271		0.271566	0.358618		0.0750322	0.151424		0.0580184	0.257181			0.120735	0.198391		0.0621353	0.110029		0.062567	0.0644845		0.0862596	0.111353			0.0833451	0.124982		0.0588243	0.0878794		0.0504584	0.0258109		0.0562424	0.0477119
105 ms	0.0268695	0.0371929		0.271595	0.358548		0.0749939	0.151428		0.0580245	0.25715			0.12163	0.200201		0.0622839	0.111029		0.0624973	0.0645284		0.0860885	0.111132			0.0836762	0.124954		0.0588213	0.0882514		0.0511908	0.0251718		0.0563818	0.0477496
106 ms	0.0271673	0.0372775		0.271913	0.358422		0.0749695	0.151387		0.0580811	0.257122			0.122129	0.201315		0.0620688	0.111207		0.062718	0.064568		0.0857391	0.110861			0.0836453	0.125468		0.0596427	0.0887037		0.0515537	0.0256416		0.0564158	0.0476853
107 ms	0.0272602	0.0375086		0.271895	0.358512		0.0747922	0.151317		0.0580415	0.257085			0.123374	0.203175		0.0620301	0.112029		0.0630327	0.0645683		0.0858335	0.110953			0.0842325	0.125842		0.0601072	0.0887161		0.051028	0.0259333		0.0566779	0.0479489
108 ms	0.0275806	0.0381969		0.272125	0.358526		0.0746867	0.151271		0.0579841	0.257048			0.124471	0.20454		0.0619551	0.112454		0.0632853	0.0646618		0.0858569	0.111094			0.0846602	0.12664		0.0601316	0.0897464		0.050874	0.0258356		0.0565295	0.0479332
109 ms	0.0273901	0.0379381		0.272202	0.35857		0.0746461	0.151252		0.0580551	0.257014			0.124963	0.205892		0.0620229	0.113325		0.0632205	0.0644166		0.0854765	0.110576			0.0845322	0.126671		0.0593467	0.0900248		0.0512334	0.0257771		0.0573815	0.0478774
110 ms	0.0274934	0.0384255		0.272609	0.358385		0.0747232	0.151246		0.0580964	0.257003			0.125779	0.206525		0.0622797	0.113717		0.0632549	0.064003		0.0854465	0.110191			0.0853751	0.126921		0.0589131	0.0905426		0.0517487	0.0254569		0.0576721	0.0474963
111 ms	0.0270977	0.038539		0.272827	0.358266		0.0747137	0.151143		0.0581099	0.256983			0.126953	0.207833		0.0621358	0.114262		0.0631389	0.0636664		0.0853859	0.109804			0.0848983	0.128228		0.0586934	0.0912457		0.0516725	0.0249455		0.0579668	0.0480157
112 ms	0.0263599	0.0382346		0.272859	0.358299		0.0746816	0.151142		0.0580467	0.257013			0.127142	0.208386		0.0620603	0.11453		0.0628363	0.0636798		0.085503	0.109714			0.0845916	0.128606		0.0589276	0.0914072		0.0513208	0.0254075		0.057649	0.0478966
113 ms	0.0258978	0.0383104		0.272503	0.358469		0.0749234	0.151119		0.057956	0.257037			0.12711	0.208073		0.0623386	0.114306		0.0624784	0.0634497		0.0855648	0.109363			0.0849536	0.128499		0.0586947	0.0914806		0.0513931	0.0249443		0.057521	0.0471508
114 ms	0.0254843	0.0381344		0.272448	0.358405		0.0749964	0.151199		0.0578952	0.257048			0.126654	0.207222		0.0626225	0.114055		0.0623191	0.0634304		0.0852984	0.109309			0.0846711	0.128215		0.0580105	0.091669		0.0511045	0.0246637		0.0571651	0.0464331
115 ms	0.0246454	0.037646		0.272225	0.358305		0.0750077	0.15123		0.0578707	0.257047			0.126823	0.207256		0.0627345	0.114312		0.0620674	0.063085		0.085153	0.109007			0.0839865	0.128522		0.0581089	0.091695		0.0506953	0.0252197		0.0570104	0.0463874
116 ms	0.024575	0.0380179		0.271984	0.35825		0.0749068	0.151246		0.0576823	0.257031			0.126836	0.207292		0.0623467	0.113875		0.0619803	0.062987		0.0853229	0.108918			0.0843666	0.12859		0.0585178	0.0921731		0.0497709	0.0256922		0.0563416	0.0466777
117 ms	0.0242443	0.0376924		0.271697	0.35829		0.0750353	0.151298		0.0577702	0.256998			0.127452	0.207888		0.0621728	0.114505		0.0617563	0.0626931		0.0856106	0.108814			0.0832038	0.129468		0.0589575	0.0928704		0.0491686	0.0256215		0.0558154	0.0467668
118 ms	0.024497	0.0380795		0.271657	0.358218		0.0749323	0.151443		0.0577831	0.256985			0.127327	0.208113		0.0624596	0.114206		0.0621991	0.0629334		0.0855232	0.108864			0.0834758	0.12922		0.0590815	0.0933345		0.0494831	0.0255068		0.0557983	0.0468465
119 ms	0.0247575	0.0381977		0.27167	0.358132		0.075116	0.151452		0.0579314	0.256929			0.127063	0.208339		0.0625879	0.114045		0.0623468	0.0627074		0.0854948	0.108429			0.0841348	0.129417		0.0591636	0.0936643		0.0497181	0.0258673		0.0558919	0.0468178
120 ms	0.0251927	0.0380706		0.271694	0.358001		0.0750234	0.151494		0.0580989	0.256851			0.127757	0.209107		0.0627515	0.11402		0.0621263	0.0625835		0.085561	0.108756			0.0837078	0.130141		0.0592641	0.094467		0.0497442	0.0262003		0.0557989	0.046883
121 ms	0.0255518	0.0380346		0.271701	0.357932		0.074969	0.151492		0.0582233	0.256807			0.127734	0.209919		0.0624835	0.11407		0.0622721	0.0624429		0.0852715	0.10869			0.083708	0.130967		0.0598738	0.0950592		0.0501094	0.0264775		0.0557127	0.0470105
122 ms	0.0263803	0.0384473		0.271681	0.357959		0.0748805	0.151408		0.0583481	0.256756			0.127865	0.210151		0.0622613	0.113697		0.0623746	0.0624796		0.0853025	0.1087			0.0841696	0.130685		0.0602495	0.0951529		0.0500386	0.0265283		0.0553035	0.0464361
123 ms	0.0263766	0.0377871		0.271691	0.358111		0.0748249	0.151416		0.0583647	0.256731			0.128401	0.210553		0.0625056	0.113797		0.0620167	0.0625236		0.0853893	0.108721			0.0846292	0.131155		0.0599569	0.0953256		0.051267	0.0264375		0.0555775	0.0463846
124 ms	0.0270046	0.037922		0.271799	0.358112		0.074707	0.151342		0.0583096	0.256707			0.128924	0.210453		0.0622629	0.113178		0.0618207	0.0624179		0.0851747	0.108551			0.0853179	0.130194		0.0595664	0.0948683		0.0515045	0.0268012		0.0553903	0.0462143
125 ms	0.0266747	0.0373556		0.271638	0.358253		0.074834	0.151291		0.0582748	0.256678			0.129039	0.209613		0.0619902	0.112921		0.0615254	0.062423		0.0856586	0.108293			0.0856946	0.131271		0.0594813	0.0952911		0.0511543	0.0268712		0.0552433	0.0461104
126 ms	0.0267326	0.0374447		0.271673	0.358364		0.0746805	0.151339		0.0581342	0.256653			0.128879	0.208572		0.0616002	0.112179		0.0613341	0.0621875		0.0859616	0.10814			0.0846964	0.132444		0.0590773	0.0959747		0.0510073	0.0265916		0.0552874	0.0457361
127 ms	0.0264634	0.0372354		0.271516	0.358618		0.0747326	0.151347		0.0580913	0.256663			0.12833	0.208117		0.0614551	0.1119		0.0614486	0.0620963		0.085647	0.107923			0.0846778	0.132844		0.0590011	0.0962314		0.0513055	0.0264004		0.0552744	0.045517
128 ms	0.0261123	0.0372612		0.27147	0.358765		0.0748852	0.151273		0.0580167	0.256655			0.128731	0.207645		0.0614376	0.111404		0.0613089	0.0618953		0.0859815	0.107793			0.0844369	0.132631		0.0588319	0.0960034		0.0511767	0.0260633		0.055054	0.0453814
129 ms	0.0253124	0.0368354		0.271552	0.358778		0.0750405	0.151283		0.0578985	0.256679			0.12825	0.206073		0.0611622	0.110822		0.0613923	0.0620652		0.0858625	0.107111			0.0837153	0.132623		0.0579924	0.0956749		0.0510923	0.0259438		0.0555093	0.0452208
130 ms	0.0252159	0.0369264		0.271691	0.358597		0.075216	0.151306		0.0578259	0.256692			0.128046	0.205673		0.0611478	0.110594		0.061642	0.0620865		0.0859743	0.106831			0.0836574	0.13169		0.0580202	0.095178		0.0502908	0.0258828		0.0553175	0.0445177
131 ms	0.0247869	0.0368412		0.271582	0.358556		0.0753982	0.151372		0.0577715	0.256677			0.12665	0.204586		0.060941	0.110391		0.0618313	0.0623483		0.0860597	0.106121			0.0834376	0.131587		0.0584759	0.0951696		0.0500995	0.0255981		0.0557696	0.0441524
132 ms	0.0247419	0.0369505		0.271574	0.35842		0.0751901	0.151368		0.0577417	0.256659			0.126704	0.204944		0.0610769	0.110513		0.0617984	0.0620775		0.085448	0.106109			0.0837873	0.130761		0.058893	0.094881		0.0501804	0.0262386		0.05562	0.0440342
133 ms	0.0242202	0.0362916		0.271378	0.358291		0.0752408	0.151431		0.0576973	0.256665			0.126888	0.205306		0.0612398	0.110568		0.0618473	0.0619795		0.0850421	0.105977			0.0839809	0.129331		0.058519	0.0939809		0.0502578	0.0256529		0.0551204	0.0441233
134 ms	0.0245575	0.0365581		0.271493	0.358043		0.0749746	0.1515		0.0577833	0.256667			0.126908	0.205435		0.061129	0.110688		0.0621993	0.0621696		0.0851336	0.105146			0.0844778	0.128206		0.0586964	0.0931354		0.0497093	0.0253626		0.0554661	0.0440654
135 ms	0.0246196	0.036053		0.271557	0.357771		0.0750223	0.151491		0.0577424	0.256651			0.127143	0.204935		0.0612923	0.110432		0.0620855	0.0619297		0.084919	0.104584			0.0851108	0.127659		0.0589643	0.0927284		0.0500207	0.0258346		0.0557207	0.0445591
136 ms	0.025122	0.0360362		0.271567	0.357581		0.074847	0.151551		0.0578563	0.256624			0.128204	0.204873		0.0611865	0.110274		0.0620806	0.061859		0.0850307	0.104659			0.0853874	0.126998		0.0592899	0.0924345		0.0501381	0.0252115		0.055988	0.0444249
137 ms	0.0253113	0.0361004		0.27171	0.357304		0.0747689	0.151573		0.0580055	0.256596			0.127614	0.20445		0.061401	0.110157		0.0619368	0.0616279		0.0848344	0.104432			0.0848388	0.128003		0.05891	0.0927467		0.0502473	0.0249922		0.0560939	0.0450158
138 ms	0.0255451	0.0356042		0.271575	0.357215		0.0747275	0.151513		0.0580539	0.256585			0.128583	0.204271		0.0614223	0.109671		0.0621479	0.0619422		0.0846331	0.104574			0.0846311	0.127629		0.0586202	0.0922843		0.0501105	0.024538		0.0553863	0.0451655
139 ms	0.0257773	0.0350689		0.271548	0.357158		0.0749979	0.151451		0.0581353	0.256578			0.128502	0.202497		0.0609848	0.108627		0.0621962	0.0620293		0.0848159	0.104096			0.0826948	0.127405		0.0580616	0.0917771		0.0499578	0.0237327		0.0547258	0.0455337
140 ms	0.0265185	0.0352283		0.271599	0.357201		0.0749149	0.151381		0.0582519	0.256562			0.12912	0.20164		0.060856	0.108479		0.0624224	0.0626788		0.0847595	0.104128			0.0826742	0.127082		0.0582182	0.0917773		0.0497453	0.0236315		0.0544804	0.0451468
141 ms	0.0262652	0.0350567		0.271799	0.357156		0.0748456	0.151339		0.0581954	0.25654			0.129605	0.19955		0.0607751	0.10768		0.0622965	0.0628975		0.0849414	0.104023			0.0818031	0.126228		0.0580531	0.0910853		0.0500803	0.0241455		0.053717	0.044793
142 ms	0.0264085	0.0353201		0.271776	0.35726		0.0748617	0.151386		0.0582545	0.256542			0.128545	0.198956		0.0610034	0.107328		0.062565	0.0633433		0.0850146	0.103713			0.0810421	0.125366		0.0577438	0.0903386		0.0501979	0.0233822		0.053797	0.0442317
143 ms	0.0258822	0.034794		0.271848	0.357317		0.0748624	0.151405		0.0582365	0.256554			0.127811	0.198436		0.0611089	0.107206		0.0622506	0.0630223		0.0848615	0.103145			0.0806515	0.125122		0.0572813	0.0900392		0.0504982	0.0238902		0.0534506	0.0444455
144 ms	0.0255183	0.0344037		0.271694	0.35756		0.0749584	0.15137		0.0581763	0.256561			0.127728	0.196909		0.0609475	0.106636		0.0624302	0.0630059		0.084782	0.103073			0.0810252	0.12403		0.057611	0.0893209		0.0504379	0.0241321		0.0536462	0.0445784
145 ms	0.0250185	0.0340775		0.2721	0.357505		0.0749014	0.15146		0.0580656	0.256582			0.127121	0.196341		0.0609883	0.106334		0.0623806	0.0630576		0.0848428	0.102394			0.0814727	0.123308		0.0576632	0.0886194		0.0505109	0.0249236		0.0546716	0.0445236
146 ms	0.0247253	0.034452		0.272109	0.357653		0.0748374	0.151539		0.0580373	0.256587			0.127142	0.196162		0.0612714	0.106688		0.0622794	0.0630584		0.0847556	0.102046			0.0825174	0.123213		0.0580559	0.0886161		0.0505986	0.025302		0.055531	0.0437901
147 ms	0.0241395	0.0344142		0.272143	0.357548		0.0750902	0.151586		0.0579511	0.25656			0.126015	0.194903		0.0613031	0.106095		0.0621789	0.062706		0.0846185	0.101373			0.083077	0.122963		0.0584283	0.0883668		0.0505858	0.0252513		0.0562426	0.0438768
148 ms	0.0237487	0.0338856		0.271916	0.357476		0.0754127	0.151553		0.0578918	0.25653			0.125703	0.194323		0.0616893	0.105963		0.0621212	0.0625494		0.0846416	0.10128			0.083333	0.123789		0.0583766	0.0888208		0.0503939	0.0253002		0.0568858	0.0440868
149 ms	0.0235056	0.0338147		0.271835	0.357394		0.0752234	0.151586		0.0579103	0.256479			0.126593	0.193874		0.0614697	0.106073		0.0620849	0.0624109		0.0845764	0.100952			0.0835028	0.124509		0.0582819	0.0894113		0.0503393	0.0256775		0.0568621	0.0442587
150 ms	0.0235279	0.0336535		0.271459	0.357427		0.0753054	0.151588		0.0578734	0.256435			0.126096	0.193577		0.0613726	0.105923		0.0622736	0.0623045		0.0849344	0.100869			0.0842547	0.125262		0.0590023	0.0897125		0.0504397	0.0256789		0.056693	0.0444708
151 ms	0.0240535	0.033715		0.271285	0.357317		0.0752259	0.151581		0.0580796	0.256379			0.12637	0.193946		0.0612863	0.1059		0.0623142	0.062715		0.0847584	0.100432			0.0835871	0.125018		0.0581802	0.0896385		0.0507865	0.0257929		0.0559003	0.0441564
152 ms	0.0242585	0.0341237		0.270917	0.357325		0.075329	0.15152		0.058013	0.256348			0.126113	0.193597		0.0614691	0.106183		0.0619542	0.062241		0.0849385	0.100642			0.0827348	0.125861		0.0579285	0.0901653		0.0510496	0.0261417		0.0554428	0.0443635
153 ms	0.0245052	0.0334272		0.27096	0.35706		0.0753458	0.151549		0.0582679	0.256264			0.127139	0.192869		0.0615841	0.105787		0.0617581	0.06217		0.0848662	0.100639			0.0829852	0.126328		0.0578158	0.0906206		0.0512726	0.0267958		0.0554105	0.0444415
154 ms	0.0246725	0.0333286		0.270726	0.357089		0.07514	0.151518		0.0580713	0.2563			0.128208	0.191833		0.061615	0.105408		0.0615628	0.0621602		0.0851055	0.100381			0.0820869	0.12727		0.0576444	0.0908761		0.0509936	0.0265763		0.0551341	0.0447403
155 ms	0.0250472	0.0329386		0.270644	0.357166		0.0750034	0.151469		0.0585068	0.256224			0.127857	0.191419		0.0615798	0.105596		0.0616908	0.0619902		0.0848825	0.0998504			0.0817546	0.127803		0.0582937	0.0912709		0.0509041	0.0269349		0.0552127	0.0446811
156 ms	0.0254856	0.0328033		0.270697	0.35719		0.0750338	0.15147		0.0581841	0.256265			0.127545	0.190358		0.0615677	0.105186		0.061568	0.0624718		0.084768	0.0997043			0.0817003	0.129254		0.0584756	0.0923807		0.0507768	0.0266411		0.0551482	0.0448812
157 ms	0.0260871	0.0330559		0.271107	0.357113		0.0749941	0.151379		0.0587004	0.256198			0.12778	0.189495		0.0617847	0.105062		0.0614217	0.0624967		0.0844606	0.0991822			0.0812094	0.130093		0.0582654	0.0932467		0.0506232	0.0268515		0.0553159	0.044833
158 ms	0.0254962	0.0324281		0.271066	0.357321		0.0748182	0.151396		0.0581358	0.25626			0.127467	0.187623		0.0616079	0.104473		0.0612526	0.0621075		0.0844017	0.0989716			0.0812109	0.131235		0.0586843	0.0943473		0.050179	0.0260641		0.0558401	0.0449988
159 ms	0.0257552	0.0323329		0.27125	0.35727		0.0747713	0.151395		0.0587453	0.256176			0.127129	0.18589		0.0610425	0.103485		0.061402	0.0624566		0.0840461	0.0986049			0.0814568	0.132303		0.0589174	0.0954936		0.0501792	0.0258968		0.0557348	0.0449375
160 ms	0.0255695	0.0328133		0.271298	0.357438		0.074563	0.151467		0.0580541	0.256297			0.12609	0.184297		0.0605847	0.102861		0.0612177	0.0623992		0.0841752	0.0983591			0.0812038	0.132773		0.0591673	0.0957291		0.049956	0.0249617		0.0556028	0.0450967
161 ms	0.0256726	0.032699		0.271573	0.357408		0.0745558	0.151487		0.0587174	0.25619			0.125564	0.184134		0.0607571	0.103039		0.061343	0.0626564		0.0837249	0.0980431			0.0816624	0.133718		0.0591612	0.0966079		0.0497515	0.0250489		0.0550541	0.0455464
162 ms	0.0251884	0.0326966		0.271767	0.357353		0.0744911	0.151671		0.0578767	0.256331			0.126506	0.183296		0.0610612	0.102469		0.0610357	0.0627486		0.0837905	0.098059			0.082319	0.134299		0.0589974	0.0975128		0.0502346	0.0244619		0.0546382	0.0463135
163 ms	0.0246469	0.0322633		0.271883	0.357196		0.0747026	0.151623		0.0586045	0.25625			0.126621	0.181986		0.0610147	0.102075		0.0610203	0.0626945		0.0839637	0.0976519			0.0820344	0.133916		0.058967	0.0971795		0.0504178	0.0246907		0.0539035	0.0465129
164 ms	0.0240469	0.0321496		0.271498	0.357258		0.0746642	0.151749		0.0576929	0.256361			0.126341	0.180794		0.060734	0.101294		0.0610502	0.0627023		0.083619	0.0976226			0.0824376	0.133752		0.0592241	0.0969835		0.0506582	0.0244716		0.0542706	0.0463869
165 ms	0.0245045	0.0325465		0.271806	0.356838		0.0749816	0.151662		0.0584862	0.25623			0.126735	0.180218		0.0612027	0.10106		0.0612395	0.0627069		0.0839071	0.0972935			0.0827003	0.133305		0.0594899	0.0966986		0.0500294	0.0248934		0.0540346	0.0462987
166 ms	0.0239174	0.0322299		0.271666	0.356773		0.0747167	0.151715		0.0576514	0.256344			0.127242	0.18061		0.0617143	0.101372		0.06143	0.0625661		0.083929	0.0970854			0.0824033	0.133057		0.0592377	0.09643		0.0496278	0.0242279		0.0542041	0.0462644
167 ms	0.0237938	0.0313066		0.271656	0.356405		0.0748481	0.151602		0.0584841	0.256184			0.126784	0.180294		0.062053	0.101297		0.0619558	0.0624316		0.0838333	0.0967626			0.0826964	0.133531		0.0586717	0.0967536		0.0495363	0.0245649		0.0538761	0.0467711
168 ms	0.0234655	0.0312829		0.271324	0.356273		0.0749664	0.151581		0.0577189	0.256307			0.126839	0.17976		0.0618188	0.100333		0.0619707	0.0622402		0.0837871	0.0966558			0.0831044	0.13279		0.0591937	0.0961284		0.0497776	0.0250752		0.0544201	0.0461629
169 ms	0.0243029	0.0315569		0.271408	0.356038		0.0751645	0.151368		0.0585814	0.256125			0.125856	0.178895		0.0614317	0.099812		0.0619745	0.0621751		0.0834522	0.0962894			0.0828468	0.131637		0.0590096	0.0948625		0.0489632	0.0256721		0.0542823	0.0458412
170 ms	0.0241101	0.0309952		0.270923	0.356266		0.0749096	0.151444		0.0578882	0.256197			0.125881	0.178694		0.0611323	0.0995593		0.0621794	0.0620716		0.0831131	0.0959232			0.0830707	0.131154		0.0595296	0.0944782		0.0478317	0.025788		0.0550083	0.0455186
171 ms	0.0248234	0.0310795		0.27113	0.356214		0.0749999	0.151272		0.0587806	0.256035			0.126035	0.179081		0.0614976	0.0996746		0.0621057	0.062095		0.0832644	0.0956405			0.0826831	0.130446		0.0595271	0.0936391		0.0474503	0.0257069		0.0548827	0.0457616
172 ms	0.0242202	0.0303671		0.270725	0.356534		0.0747029	0.151365		0.0580344	0.256136			0.12681	0.17896		0.0613797	0.0994427		0.0621339	0.0620404		0.0830096	0.0953923			0.0829516	0.129716		0.0598765	0.0927411		0.0481238	0.0258269		0.0554035	0.0457782
173 ms	0.0250666	0.0305877		0.270555	0.356741		0.0751285	0.151297		0.0589477	0.255971			0.126492	0.178287		0.0610203	0.0987115		0.0622718	0.0623534		0.0828599	0.0950393			0.0833616	0.128788		0.060693	0.0918678		0.0482532	0.0260938		0.0547151	0.0458435
174 ms	0.0250626	0.0308247		0.270545	0.35711		0.0750856	0.151313		0.0581484	0.256063			0.127005	0.178164		0.0610039	0.0982904		0.0621525	0.062524		0.0825891	0.0948761			0.082972	0.12669		0.0610335	0.0904049		0.0478915	0.0257113		0.055291	0.0452447
175 ms	0.0257567	0.0307799		0.270765	0.357277		0.075106	0.151279		0.058996	0.255872			0.126639	0.17795		0.0612115	0.0981396		0.0622579	0.0627229		0.0828963	0.0946609			0.0820536	0.125845		0.060218	0.0895618		0.047413	0.0250727		0.0554587	0.0453049
176 ms	0.024875	0.0303674		0.27054	0.357583		0.0749015	0.151449		0.0581631	0.256004			0.126454	0.17879		0.0609933	0.0982372		0.062342	0.0625581		0.0827969	0.0945222			0.0820252	0.124885		0.0597055	0.0889754		0.0476098	0.0247112		0.0556654	0.0444267
177 ms	0.0254483	0.0310162		0.270791	0.357434		0.0750437	0.151394		0.0588763	0.255866			0.126402	0.178815		0.0609552	0.0982303		0.0622572	0.0625022		0.0828489	0.0943242			0.0817906	0.123434		0.0590152	0.0879757		0.0486972	0.0247232		0.0550623	0.0440302
178 ms	0.0244946	0.0306551		0.27067	0.357523		0.0748887	0.151636		0.0580087	0.255987			0.127188	0.178312		0.0607346	0.0977426		0.0625671	0.0624731		0.0828163	0.0943055			0.0821642	0.122324		0.0590253	0.0872423		0.0485417	0.0243012		0.0545017	0.0438521
179 ms	0.0250953	0.0314083		0.270916	0.357352		0.0752549	0.151631		0.0587699	0.255828			0.131337	0.18181		0.0606148	0.097665		0.062226	0.0625687		0.0828701	0.0940912			0.0807096	0.121311		0.0585585	0.0864957		0.0484351	0.0244757		0.054242	0.0434295
180 ms	0.0241487	0.0311551		0.271159	0.357165		0.0749977	0.151782		0.0577902	0.255959			0.132168	0.181759		0.0607397	0.0977341		0.0619853	0.0621019		0.0832759	0.0939021			0.0809473	0.120848		0.0584965	0.0860077		0.0480692	0.0248244		0.0549714	0.0433265
181 ms	0.0241976	0.0311425		0.271284	0.356967		0.0750823	0.151827		0.0586045	0.255813			0.131946	0.182095		0.0605398	0.0974781		0.0621486	0.0621514		0.0834289	0.0935371			0.0811543	0.120524		0.0583322	0.0858991		0.0482563	0.0252635		0.0551102	0.0428926
182 ms	0.0231597	0.0309436		0.271193	0.356807		0.0748304	0.15188		0.0576313	0.255943			0.132552	0.182067		0.0602513	0.0976605		0.0621664	0.062178		0.0833202	0.093158			0.0816969	0.119889		0.058644	0.0856943		0.0488777	0.0247738		0.0545455	0.0421684
183 ms	0.0237469	0.0315377		0.27123	0.356603		0.0750375	0.151795		0.0584111	0.255761			0.13357	0.181631		0.0606205	0.0973667		0.0620311	0.0620549		0.0837191	0.092854			0.081677	0.119679		0.0593136	0.085628		0.0489929	0.0249118		0.0547841	0.0421797
184 ms	0.0230099	0.0308892		0.271095	0.356467		0.0747958	0.151785		0.0576101	0.255845			0.133584	0.18263		0.0607513	0.0972863		0.0620279	0.0622983		0.0836638	0.0927067			0.0809891	0.119382		0.0595698	0.0856123		0.0482233	0.0255776		0.0549118	0.04205
185 ms	0.0237979	0.0309628		0.271164	0.356133		0.0749734	0.151569		0.0585557	0.255662			0.132948	0.182777		0.060715	0.0973245		0.0620203	0.062535		0.0834885	0.0922097			0.0803298	0.119907		0.0594363	0.0859067		0.0490361	0.0262918		0.0546457	0.0422832
186 ms	0.0233903	0.0309031		0.271173	0.356		0.0746611	0.151515		0.0576827	0.255755			0.127936	0.179883		0.0606485	0.0972235		0.0621019	0.062621		0.0836176	0.091886			0.0812433	0.120649		0.0596967	0.0867045		0.0487054	0.0261178		0.0542661	0.0426406
187 ms	0.0238672	0.0304296		0.271147	0.355868		0.0748316	0.151357		0.0586955	0.25557			0.127104	0.180652		0.0606602	0.097182		0.0620145	0.062643		0.0831208	0.0915912			0.0809295	0.120793		0.059337	0.0873556		0.0488865	0.0256826		0.0535674	0.0425993
188 ms	0.0239477	0.0308321		0.270731	0.356056		0.0745768	0.151353		0.0579329	0.255686			0.127342	0.18055		0.0606147	0.0972583		0.0618934	0.0624107		0.0831956	0.0911936			0.0802022	0.121388		0.0594215	0.0878706		0.048725	0.0254782		0.0531026	0.0428981
189 ms	0.0252471	0.0310831		0.270722	0.356121		0.0748738	0.151265		0.0589324	0.255509			0.126249	0.180927		0.0607028	0.0970855		0.0620219	0.0621192		0.0828277	0.0909459			0.0802892	0.120805		0.0593091	0.0879062		0.0482704	0.0256204		0.0533221	0.0429594
190 ms	0.0246267	0.0302958		0.270898	0.356191		0.0744002	0.151332		0.0582372	0.255621			0.125603	0.181025		0.0603009	0.0968821		0.0623097	0.0622597		0.0825601	0.0907298			0.0799571	0.120868		0.05864	0.0882285		0.0486232	0.0251941		0.0531709	0.0430135
191 ms	0.025356	0.0308276		0.270982	0.356382		0.0746586	0.151246		0.059067	0.255471			0.125974	0.180535		0.060779	0.0968345		0.0621224	0.0619064		0.0826572	0.0903126			0.0798526	0.121572		0.0588407	0.0888451		0.0489352	0.025015		0.0533484	0.0431107
192 ms	0.0250787	0.0309995		0.271083	0.356484		0.0744929	0.151361		0.0581728	0.2556			0.125693	0.180111		0.0607351	0.0966618		0.0618942	0.0615129		0.0828884	0.0899368			0.0796498	0.121217		0.0588509	0.0887915		0.0482189	0.0240998		0.0539718	0.0425556
193 ms	0.0253937	0.0308679		0.270982	0.356709		0.0747315	0.151415		0.059079	0.255482			0.125033	0.179571		0.0607027	0.0963629		0.0619878	0.0614329		0.0825142	0.0895477			0.0798364	0.120874		0.0587328	0.0891416		0.0486907	0.0243836		0.0542193	0.0414998
194 ms	0.0250167	0.0310904		0.270933	0.356813		0.0744542	0.151613		0.0581053	0.255611			0.124857	0.178911		0.0605959	0.0960425		0.0616913	0.0615105		0.0823599	0.0889951			0.0793751	0.120385		0.0583984	0.0890377		0.0487589	0.0246525		0.0542144	0.0416655
195 ms	0.025315	0.0311607		0.271253	0.356589		0.0747708	0.151607		0.0588428	0.255477			0.12419	0.17854		0.0604456	0.0954649		0.0617072	0.0614645		0.0820857	0.0888967			0.0789878	0.120113		0.0580117	0.0893942		0.04856	0.0250299		0.0538799	0.0406873
196 ms	0.024086	0.0306487		0.271563	0.356522		0.0747679	0.151777		0.0579225	0.255607			0.124484	0.177949		0.0603387	0.0947928		0.06159	0.0616379		0.0825051	0.0884494			0.0781829	0.120039		0.0582912	0.0889227		0.0489552	0.0250411		0.0541017	0.0407324
197 ms	0.024536	0.0313246		0.27146	0.356496		0.075311	0.151757		0.0587237	0.255463			0.124479	0.176969		0.0601955	0.0942396		0.061139	0.061425		0.08271	0.0879481			0.0776629	0.119467		0.0587482	0.0886479		0.0487069	0.0250404		0.0536086	0.0403001
198 ms	0.0239727	0.0311634		0.271587	0.356213		0.0749808	0.151951		0.0577814	0.255582			0.124603	0.176083		0.0595803	0.093545		0.0614757	0.0617223		0.0826039	0.0874799			0.078341	0.118409		0.0586237	0.0874686		0.0491452	0.0248909		0.0530945	0.0410407
199 ms	0.0235942	0.0305219		0.271542	0.356159		0.075137	0.151874		0.0585248	0.255407			0.125063	0.176066		0.0595496	0.0931793		0.0614278	0.0617836		0.082345	0.0868109			0.0781102	0.118652		0.0581662	0.087875		0.0486432	0.0253758		0.0527112	0.0409942
200 ms	0.0228276	0.0303617		0.271497	0.356077		0.0747057	0.151854		0.0576832	0.255491			0.125337	0.176323		0.0593791	0.0927543		0.0612186	0.0618132		0.0821631	0.0863573			0.0769475	0.117576		0.0586791	0.0866846		0.0478249	0.0249264		0.0526858	0.0417807
201 ms	0.0231408	0.0301567		0.271626	0.355926		0.0747801	0.151609		0.0585949	0.255311			0.125454	0.176228		0.0595123	0.0925373		0.0617309	0.0616581		0.0823491	0.0861215			0.0763192	0.117118		0.0586324	0.0860095		0.0483079	0.024971		0.0533524	0.0419116
202 ms	0.0224213	0.029983		0.271519	0.355858		0.0746577	0.151557		0.0579039	0.255386			0.12568	0.175728		0.0593635	0.0916179		0.0615373	0.0615722		0.0825726	0.0851917			0.0760063	0.116128		0.058107	0.0850115		0.0484387	0.0249778		0.0537526	0.0425363
203 ms	0.023063	0.0301165		0.27145	0.35569		0.074661	0.151419		0.0588047	0.255211			0.125673	0.17572		0.0589219	0.0914126		0.0612366	0.0613607		0.0821715	0.0850163			0.0767775	0.115556		0.0575912	0.084965		0.048053	0.0248133		0.0538217	0.0426109
204 ms	0.0226569	0.0294412		0.271507	0.355677		0.0744451	0.151356		0.0579543	0.255298			0.12496	0.176443		0.059174	0.0913067		0.0614724	0.0615279		0.0820006	0.0845305			0.076486	0.115213		0.0566823	0.0848199		0.0477744	0.0245336		0.0541204	0.0421248
205 ms	0.0233662	0.029631		0.271592	0.355812		0.074631	0.151149		0.0589558	0.255135			0.124001	0.177221		0.0592632	0.0909486		0.0606718	0.0613453		0.0819442	0.0842498			0.0762906	0.114472		0.0565707	0.084553		0.0474024	0.0248259		0.0548391	0.0416695
206 ms	0.0236009	0.0299875		0.271738	0.355928		0.0746026	0.151179		0.0580816	0.255268			0.124339	0.177535		0.0594621	0.0904288		0.0603566	0.061326		0.081982	0.0839032			0.075975	0.113252		0.0567127	0.0836677		0.0478317	0.024523		0.0550939	0.0415062
207 ms	0.0240795	0.0296259		0.272004	0.35595		0.0750071	0.151094		0.0588696	0.255123			0.125408	0.17774		0.0595325	0.0901771		0.0604533	0.0611611		0.0823187	0.0835046			0.0763528	0.113061		0.0566145	0.0836132		0.0484944	0.0243402		0.054524	0.0412989
208 ms	0.0238694	0.0299268		0.272053	0.356275		0.0749096	0.151207		0.0579481	0.255267			0.124984	0.177995		0.0593544	0.0896985		0.0602218	0.0615118		0.0822072	0.0829521			0.076547	0.11141		0.0567068	0.0827962		0.0481473	0.0242105		0.053928	0.0403897
209 ms	0.0247103	0.0300906		0.272235	0.356479		0.0750671	0.151258		0.0587314	0.255145			0.124513	0.179392		0.0596375	0.0900702		0.0599091	0.0618251		0.0821154	0.0828015			0.0766128	0.110531		0.0568511	0.0821062		0.0479857	0.0238505		0.0535365	0.0401364
210 ms	0.0239642	0.0299617		0.272333	0.356601		0.0748958	0.151378		0.0578496	0.25531			0.124706	0.180101		0.06013	0.0895133		0.0598518	0.0619165		0.0823675	0.0823426			0.0758159	0.109757		0.0567942	0.0813826		0.0484965	0.0242622		0.0533064	0.0398625
211 ms	0.024312	0.0304552		0.272443	0.35661		0.0751214	0.151542		0.0586078	0.255221			0.12542	0.181116		0.0599781	0.0887609		0.0600157	0.0618628		0.081967	0.0819989			0.0756369	0.109981		0.0575559	0.0812295		0.0482602	0.0250281		0.0530557	0.0398833
212 ms	0.023471	0.0299497		0.272712	0.35662		0.0754286	0.15181		0.0576935	0.255412			0.126191	0.180832		0.0598191	0.0881775		0.0607758	0.0616124		0.0817225	0.0813229			0.0752595	0.109761		0.0573242	0.0810877		0.0480982	0.0247908		0.0527636	0.0391188
213 ms	0.0234215	0.0301099		0.272943	0.356416		0.0756723	0.151929		0.0585566	0.255321			0.125912	0.182057		0.059914	0.0878451		0.0611174	0.0612156		0.0817965	0.0809746			0.0756512	0.109342		0.0573064	0.0807129		0.0481788	0.0244595		0.052022	0.0390926
214 ms	0.0228503	0.0303661		0.273132	0.356239		0.0757642	0.15214		0.0577007	0.25548			0.124671	0.182743		0.0599159	0.087214		0.0609749	0.0611134		0.0813216	0.0806998			0.0749835	0.10993		0.0564102	0.0810147		0.0482343	0.024777		0.0520394	0.0391928
215 ms	0.0226049	0.0298824		0.273327	0.355882		0.0762676	0.152104		0.0585182	0.255388			0.125153	0.183591		0.059909	0.086445		0.0608369	0.0604821		0.0812089	0.0803509			0.0751371	0.110693		0.0560561	0.0816679		0.0479261	0.0250801		0.0527976	0.0393197
216 ms	0.02155	0.0294034		0.273745	0.355432		0.076249	0.152187		0.0575618	0.255536			0.124985	0.183668		0.0597044	0.0858085		0.0612034	0.0598146		0.0807501	0.0800144			0.0755569	0.111563		0.0567902	0.0824326		0.0485895	0.0248251		0.0531008	0.0394545
217 ms	0.0219557	0.0296703		0.274107	0.355048		0.0765948	0.152001		0.0584079	0.255427			0.124358	0.18482		0.0596656	0.0855381		0.0612851	0.0595646		0.0803822	0.0794058			0.0750099	0.111697		0.0564758	0.082826		0.0483196	0.0247205		0.0526132	0.0386883
218 ms	0.0212659	0.0291448		0.274335	0.354751		0.0765789	0.151909		0.0576516	0.255563			0.1238	0.185701		0.0594958	0.0850917		0.0609267	0.0590485		0.0805091	0.0788897			0.0756379	0.110806		0.0564853	0.0822606		0.0488018	0.0245267		0.0529833	0.0389694
219 ms	0.0214344	0.0290896		0.274715	0.35423		0.0766572	0.15175		0.0585189	0.25541			0.122532	0.186968		0.0591809	0.0845384		0.060538	0.0589524		0.0804962	0.0786857			0.0755475	0.110466		0.0566758	0.0821048		0.0495192	0.0246868		0.0528679	0.0389234
220 ms	0.0212626	0.0287897		0.274885	0.354011		0.0767217	0.151735		0.0578314	0.255518			0.12149	0.188188		0.0587155	0.0841517		0.0604812	0.0587908		0.0800155	0.0782657			0.0751984	0.110432		0.0561726	0.0822641		0.0495803	0.0246259		0.0533076	0.0384638
221 ms	0.0220871	0.0285168		0.275287	0.353647		0.0769399	0.151556		0.0587289	0.255385			0.120697	0.188775		0.0584198	0.0838524		0.0606283	0.0585526		0.0799518	0.0776597			0.075343	0.108737		0.0564587	0.0814038		0.0498505	0.0246868		0.0539695	0.0378369
222 ms	0.0223508	0.0290423		0.275691	0.353428		0.0769772	0.151596		0.0579642	0.255475			0.120106	0.190016		0.0580629	0.0836725		0.0604519	0.0582703		0.0799521	0.0772917			0.0748222	0.108066		0.056525	0.0805484		0.0498983	0.0243905		0.0529902	0.0375813
223 ms	0.0231165	0.0289295		0.27599	0.353294		0.0773775	0.151413		0.0588353	0.255289			0.120054	0.191013		0.0582045	0.0833583		0.0603272	0.0579954		0.0800252	0.0768242			0.07462	0.106808		0.0559028	0.0796406		0.0494011	0.0247376		0.0532421	0.0363234
224 ms	0.0233123	0.0289574		0.276429	0.353145		0.0773863	0.151483		0.0580232	0.255333			0.119393	0.191749		0.0579518	0.0831637		0.0606496	0.0574829		0.0800557	0.0765733			0.0747291	0.106603		0.0560352	0.0793168		0.0493022	0.0247462		0.0531785	0.0362193
225 ms	0.0239407	0.028877		0.277131	0.352803		0.0778568	0.151285		0.0588186	0.255105			0.118602	0.192447		0.0582585	0.0831273		0.0606501	0.0574873		0.0798476	0.0762912			0.0748237	0.10644		0.0552189	0.0795845		0.0487953	0.0245257		0.0529887	0.0359478
226 ms	0.024098	0.0295747		0.277582	0.352536		0.078001	0.151237		0.0579122	0.255124			0.118359	0.193107		0.0590008	0.0833472		0.0605282	0.0570903		0.0794746	0.0760557			0.0750268	0.105573		0.0549712	0.0791359		0.0485912	0.0249077		0.0526764	0.0354002
227 ms	0.0248205	0.0297562		0.278018	0.352141		0.0781875	0.151187		0.0587137	0.254878			0.118474	0.193403		0.0590875	0.0832605		0.0602566	0.0569758		0.0793559	0.0755998			0.0746422	0.105864		0.0553705	0.0789996		0.048676	0.0249209		0.0526396	0.035875
228 ms	0.0240878	0.0296866		0.278482	0.351735		0.0782143	0.151344		0.0577888	0.254919			0.118628	0.194753		0.0593577	0.0831343		0.0601268	0.0562742		0.0790362	0.0751124			0.0747725	0.105628		0.0550562	0.0788261		0.0480302	0.0248249		0.0516927	0.0357229
229 ms	0.0242568	0.0297029		0.278848	0.351277		0.0784125	0.151312		0.0585513	0.254664			0.118633	0.195047		0.0594468	0.0827396		0.0601748	0.055647		0.0785447	0.07486			0.074371	0.105863		0.0549388	0.0791167		0.0487905	0.0253998		0.0519526	0.0356072
230 ms	0.0237737	0.0299634		0.27919	0.350789		0.0784654	0.151422		0.0577364	0.254704			0.118986	0.196013		0.0593073	0.0829585		0.0601202	0.0551344		0.0784244	0.0745931			0.0742369	0.105729		0.0553011	0.0789167		0.0493875	0.0246252		0.0510512	0.0360697
231 ms	0.0236935	0.0297374		0.279701	0.350152		0.0787889	0.151369		0.0583987	0.254459			0.119683	0.196654		0.0596538	0.0828641		0.0594771	0.0547864		0.0777407	0.074047			0.0740829	0.105254		0.0554781	0.0785466		0.049711	0.0246583		0.0509552	0.0355318
232 ms	0.023321	0.0301976		0.280208	0.349502		0.0784207	0.151498		0.0575325	0.254476			0.119689	0.197101		0.0592358	0.0824454		0.0594121	0.0543044		0.0778335	0.0735169			0.0734174	0.105138		0.0561555	0.0781504		0.0496995	0.0242019		0.0509906	0.0348706
233 ms	0.023152	0.0294452		0.28062	0.348974		0.0784746	0.151431		0.0584187	0.254238			0.119187	0.197676		0.0588409	0.0822832		0.0594387	0.0537624		0.0778031	0.0728486			0.0729772	0.105214		0.0561906	0.0781035		0.049386	0.0235652		0.0509921	0.0352539
234 ms	0.0227345	0.0297374		0.281339	0.348388		0.078369	0.15127		0.0576052	0.25425			0.118725	0.197589		0.0588196	0.08196		0.059793	0.0534642		0.0773343	0.0727022			0.0732885	0.104085		0.0559394	0.0772275		0.0487901	0.0233508		0.0506839	0.0348512
235 ms	0.0232798	0.0296872		0.282055	0.347796		0.0784304	0.151047		0.058487	0.253963			0.119411	0.197916		0.0584854	0.0815589		0.0597545	0.0532679		0.0774881	0.072362			0.0731641	0.104729		0.0558855	0.0778145		0.049405	0.0236273		0.0515929	0.0348886
236 ms	0.0230622	0.0295598		0.282799	0.347288		0.0784729	0.151076		0.0577016	0.25398			0.119517	0.198522		0.058759	0.0817534		0.0598578	0.0531074		0.0774271	0.0715373			0.0736711	0.103714		0.0560076	0.0769649		0.0483821	0.0225482		0.0513157	0.0346197
237 ms	0.0240472	0.02987		0.283637	0.346654		0.0785637	0.150979		0.0586195	0.253698			0.11877	0.199178		0.0591029	0.0818354		0.0597401	0.0530858		0.0770578	0.0711579			0.0734098	0.104099		0.0555852	0.0773021		0.048163	0.0228417		0.0516789	0.0342445
238 ms	0.0238896	0.0293558		0.284146	0.346471		0.0785762	0.150968		0.0578866	0.253704			0.11876	0.199802		0.0591544	0.0818426		0.0598261	0.0527021		0.0773947	0.0706779			0.0731924	0.104343		0.0551502	0.0772629		0.0478487	0.0231045		0.0519845	0.0344973
239 ms	0.0250198	0.0297031		0.28507	0.346067		0.0791321	0.150864		0.0587989	0.253438			0.118893	0.200433		0.0594955	0.0817069		0.0598881	0.0523702		0.0767382	0.0704645			0.0732586	0.10325		0.0549409	0.0765152		0.0481883	0.0240463		0.0516027	0.0347383
240 ms	0.0249289	0.0297193		0.285993	0.345735		0.0793671	0.150846		0.0578821	0.253443			0.119312	0.200308		0.0599206	0.0819091		0.0602119	0.0521409		0.0766394	0.0699367			0.0731222	0.103134		0.0547396	0.0766126		0.0488434	0.0236926		0.0512381	0.0343493
241 ms	0.0256492	0.0298291		0.287213	0.345337		0.0797715	0.150767		0.0586657	0.253193			0.119047	0.200905		0.0602126	0.0818012		0.0602091	0.051852		0.0764837	0.0691241			0.0727779	0.102805		0.0547663	0.0763404		0.0489193	0.0233824		0.051566	0.0334872
242 ms	0.0256263	0.0303631		0.288327	0.345065		0.0800354	0.150751		0.0579563	0.253199			0.118433	0.200766		0.0607969	0.0819282		0.0603031	0.0516479		0.0761612	0.0688582			0.0726981	0.103142		0.0551345	0.0761603		0.0487045	0.0229694		0.0505967	0.0339887
243 ms	0.0263447	0.0308652		0.29001	0.344352		0.080385	0.150559		0.0586749	0.252956			0.117473	0.200658		0.0611501	0.0819862		0.0601137	0.0511973		0.0756034	0.0685984			0.0722841	0.103627		0.0553559	0.076301		0.0485729	0.0228555		0.0510057	0.0336397
244 ms	0.0251659	0.0304356		0.291622	0.344008		0.080499	0.150646		0.0577608	0.252982			0.117292	0.199552		0.0611087	0.0814259		0.0599672	0.0503011		0.0753835	0.0682445			0.0718309	0.102915		0.0553809	0.0758574		0.0481672	0.0227003		0.0512639	0.0337431
245 ms	0.025289	0.0305302		0.293545	0.343371		0.0810677	0.150674		0.058513	0.252773			0.116601	0.198766		0.0613689	0.0814779		0.0599715	0.0497216		0.0746308	0.067695			0.0717644	0.102449		0.0556804	0.075458		0.0484185	0.0227169		0.0510219	0.0340559
246 ms	0.0239845	0.0300624		0.295457	0.343016		0.0812056	0.150773		0.0576179	0.252821			0.116852	0.197836		0.0617699	0.0818208		0.0596973	0.049484		0.0743811	0.0670684			0.0720758	0.102939		0.0555781	0.0757073		0.0484085	0.022118		0.051145	0.0334248
247 ms	0.0243997	0.0306153		0.297932	0.342472		0.0816021	0.150725		0.0584519	0.252603			0.115909	0.197191		0.0616493	0.0815731		0.059283	0.0490394		0.0739723	0.0665986			0.0722742	0.10303		0.0551777	0.0757641		0.0475296	0.0216798		0.0514895	0.0336384
248 ms	0.0229528	0.0296467		0.300425	0.342167		0.0817759	0.150821		0.0575216	0.252617			0.116	0.19686		0.061793	0.0817639		0.0590368	0.048362		0.0738633	0.0663715			0.0720472	0.102896		0.0554423	0.075902		0.0479141	0.0218941		0.0513858	0.0334222
249 ms	0.0230879	0.0297578		0.303109	0.341987		0.0820856	0.150806		0.0582265	0.252358			0.11537	0.196661		0.0623909	0.0823038		0.0586496	0.047653		0.0736144	0.065535			0.0717674	0.101853		0.0551622	0.0753015		0.047662	0.0219354		0.0521313	0.0324654
250 ms	0.0217205	0.0286531		0.305881	0.342271		0.0821546	0.1509		0.0574924	0.25234			0.115532	0.196445		0.063213	0.0826647		0.0587114	0.0476644		0.0738204	0.0648484			0.0721906	0.10094		0.0545154	0.0751091		0.0480468	0.0225684		0.0513675	0.0323425
251 ms	0.0223214	0.0285282		0.309406	0.342341		0.0826793	0.150647		0.0583503	0.252076			0.115582	0.196682		0.0641596	0.083544		0.0585634	0.0476452		0.0735535	0.0642021			0.0727029	0.101412		0.054087	0.0755599		0.0482538	0.0224885		0.0509701	0.0322888
252 ms	0.0220111	0.0286271		0.313582	0.342731		0.0826924	0.150585		0.0576053	0.252016			0.115441	0.196605		0.0644035	0.0833416		0.0586118	0.0469397		0.0737747	0.0639358			0.0725782	0.101067		0.0542842	0.0753571		0.0482121	0.021732		0.0508946	0.0317145
253 ms	0.0228335	0.0288886		0.317944	0.343358		0.0833462	0.150444		0.058496	0.25172			0.114654	0.19632		0.0651409	0.0837067		0.0588127	0.046357		0.0737965	0.063643			0.0717421	0.101278		0.054473	0.0752245		0.0481219	0.0220334		0.0508064	0.0319379
254 ms	0.0227265	0.0288426		0.322628	0.344371		0.0836339	0.150425		0.0576748	0.251652			0.114824	0.196517		0.065877	0.0841018		0.0588099	0.0463463		0.0737602	0.0632366			0.0716884	0.100783		0.0551889	0.074888		0.0487761	0.0220712		0.0507912	0.0310334
255 ms	0.023509	0.028566		0.328187	0.345579		0.0845555	0.150204		0.0586138	0.251354			0.11428	0.196186		0.0666564	0.0842918		0.0588075	0.0462713		0.073869	0.0626819			0.071665	0.100777		0.0548086	0.0745377		0.0488773	0.0212739		0.0503079	0.031645
256 ms	0.0236378	0.0287691		0.33441	0.346912		0.0851526	0.150057		0.0579291	0.251325			0.113783	0.195801		0.0668203	0.084456		0.0589446	0.0461973		0.0734894	0.062067			0.0713429	0.101145		0.0547274	0.0745912		0.048494	0.0211617		0.0501723	0.0319283
257 ms	0.0247176	0.0294077		0.341515	0.348596		0.0861111	0.149666		0.0587439	0.251029			0.112546	0.195185		0.0668132	0.084837		0.0590376	0.0456848		0.0730671	0.061858			0.0707441	0.101596		0.0551606	0.0743627		0.0487429	0.0212604		0.0504241	0.0318419
258 ms	0.0243261	0.0291542		0.349257	0.35062		0.0867362	0.149402		0.0580077	0.250985			0.112586	0.194519		0.0673162	0.0851245		0.0593094	0.0454421		0.0730213	0.0612732			0.0699722	0.100197		0.0553347	0.0731223		0.0491932	0.0208549		0.0504332	0.0317624
259 ms	0.0247548	0.0290515		0.357855	0.353057		0.0879101	0.148947		0.058871	0.250699			0.112276	0.194319		0.0682871	0.0860816		0.0590848	0.0456485		0.0726276	0.0606727			0.0709513	0.0993394		0.055312	0.0724201		0.0493759	0.0212218		0.0509934	0.0322609
260 ms	0.0242213	0.0291909		0.367514	0.355818		0.0886108	0.148634		0.0581454	0.250672			0.111674	0.194424		0.0687957	0.0864279		0.0588826	0.0453851		0.0723092	0.0602296			0.0710545	0.0976882		0.054811	0.0715044		0.0498033	0.0210106		0.0513587	0.0319354
261 ms	0.0240878	0.0289302		0.378277	0.358998		0.0902286	0.148262		0.0589772	0.250425			0.111083	0.193615		0.0693042	0.0867072		0.0587668	0.0448599		0.0718098	0.0598239			0.0710246	0.0974547		0.0538809	0.070779		0.0493037	0.0211346		0.0516311	0.032197
262 ms	0.0235006	0.0294392		0.389926	0.362515		0.0914394	0.148051		0.058046	0.250441			0.11105	0.193223		0.0698825	0.08746		0.0586874	0.04453		0.071544	0.0594471			0.0711043	0.0971059		0.054137	0.0704154		0.0488059	0.021206		0.0517334	0.031947
263 ms	0.0229831	0.0284097		0.403016	0.366828		0.0932466	0.147683		0.0587771	0.250198			0.111124	0.192789		0.0709053	0.0884723		0.0588556	0.0443048		0.0714125	0.0592208			0.0716804	0.0959894		0.0542898	0.0692445		0.049135	0.0210188		0.0514668	0.0320093
264 ms	0.0222141	0.0286611		0.417131	0.371823		0.0950025	0.14752		0.0580295	0.250206			0.111554	0.192773		0.0720899	0.089359		0.0587755	0.043763		0.0714415	0.0587367			0.0718406	0.0952053		0.0545817	0.068288		0.048752	0.0202028		0.0513244	0.0323776
265 ms	0.0222749	0.028785		0.43248	0.377465		0.0974807	0.147168		0.0587653	0.249954			0.110433	0.192371		0.0730216	0.0900014		0.0588636	0.0436088		0.0712321	0.0585384			0.0722352	0.0958385		0.0551659	0.0684919		0.0486997	0.0202611		0.0515609	0.0322791
266 ms	0.0214725	0.0287589		0.448987	0.384004		0.0998641	0.146935		0.0578842	0.249961			0.109919	0.191495		0.0738539	0.0909852		0.0588212	0.0435029		0.071081	0.0583414			0.0718051	0.0961874		0.055378	0.0686708		0.047869	0.0208218		0.0512757	0.0317861
267 ms	0.021477	0.0280246		0.467117	0.391611		0.10286	0.146533		0.0586771	0.249695			0.109925	0.190955		0.0749595	0.092633		0.0589759	0.0434053		0.070912	0.0579193			0.0724677	0.0965151		0.0560351	0.0687949		0.0471313	0.0210171		0.0512787	0.0318369
268 ms	0.0210653	0.0277334		0.486736	0.400058		0.105616	0.146241		0.0581372	0.24968			0.109961	0.190441		0.0764919	0.0945298		0.058858	0.0433723		0.0711141	0.0575062			0.071975	0.0965676		0.0569742	0.0682845		0.0469209	0.0204424		0.0511367	0.0319675
269 ms	0.0217582	0.0278838		0.507934	0.409745		0.109426	0.145756		0.0591644	0.249395			0.109932	0.189751		0.0779398	0.0968947		0.0587615	0.0431358		0.0709542	0.0571127			0.0718061	0.0970722		0.0572656	0.0687297		0.0469451	0.0206483		0.0514208	0.0321166
270 ms	0.0215709	0.0279706		0.530665	0.420526		0.113548	0.145685		0.0584823	0.249397			0.109757	0.188755		0.0791462	0.0992077		0.0587474	0.043005		0.0709992	0.0562093			0.0718654	0.0972525		0.057217	0.0690588		0.046953	0.0209589		0.0514956	0.0320921
271 ms	0.0222839	0.0275908		0.555141	0.432239		0.118189	0.145664		0.059459	0.249166			0.109732	0.187689		0.0805512	0.101988		0.0585386	0.0429195		0.0710107	0.0563169			0.0722114	0.0977903		0.0565768	0.0696828		0.0466547	0.020402		0.0517106	0.0317805
272 ms	0.0224856	0.0278731		0.581444	0.44531		0.123097	0.146088		0.0587733	0.249205			0.109445	0.187514		0.0820726	0.105466		0.0582752	0.042545		0.0709043	0.0560574			0.07252	0.0976838		0.0563885	0.0697411		0.0462354	0.0205831		0.051346	0.0311705
273 ms	0.0233896	0.0277572		0.609372	0.459458		0.128787	0.146428		0.059955	0.249028			0.109324	0.187035		0.0842679	0.109196		0.0584241	0.0422925		0.0704496	0.0557152			0.0719096	0.0976534		0.0565244	0.0691229		0.0468449	0.0202918		0.0516384	0.0316146
274 ms	0.0232163	0.0276963		0.638529	0.474795		0.13506	0.147326		0.0592899	0.249141			0.109734	0.186246		0.0866635	0.113061		0.0583456	0.041937		0.0701061	0.05537			0.0711351	0.0978432		0.0564986	0.0690622		0.0473961	0.0194871		0.0512675	0.0311159
275 ms	0.0239379	0.0280206		0.669393	0.491382		0.142345	0.148554		0.0602576	0.249022			0.109309	0.185866		0.0894317	0.117671		0.0582668	0.0416606		0.0696062	0.0556012			0.0715508	0.0981011		0.0562958	0.0695978		0.0473868	0.0197101		0.051059	0.0308753
276 ms	0.0233901	0.0281664		0.70198	0.508836		0.149741	0.150628		0.0596543	0.249192			0.108636	0.185267		0.0918194	0.122069		0.0579372	0.0412301		0.0691592	0.0554221			0.0720245	0.0982148		0.0560812	0.0696975		0.0472232	0.0199243		0.050988	0.0304986
277 ms	0.0239164	0.0287193		0.736169	0.526947		0.158204	0.15305		0.0607732	0.249166			0.109031	0.185365		0.0950213	0.127222		0.0575846	0.0407473		0.0688528	0.056383			0.0719903	0.0985953		0.0566521	0.069862		0.0469198	0.0197566		0.0509329	0.0300196
278 ms	0.0230943	0.0286534		0.771589	0.546304		0.167313	0.156625		0.0602293	0.249439			0.108228	0.185019		0.0979445	0.132739		0.0574153	0.0403614		0.0684599	0.0556178			0.071694	0.098295		0.057141	0.0693628		0.0474195	0.0201012		0.051364	0.0295027
279 ms	0.0226853	0.027705		0.808386	0.566244		0.177668	0.160925		0.0613299	0.249498			0.10799	0.184143		0.101127	0.13898		0.0570181	0.0402422		0.0681994	0.0554429			0.0716687	0.0983757		0.0572231	0.0692683		0.0472043	0.0200049		0.0517341	0.0292018
280 ms	0.0220569	0.0283371		0.846452	0.586979		0.188683	0.166675		0.0607414	0.249858			0.10832	0.18369		0.104287	0.145437		0.057001	0.0399964		0.0682508	0.055126			0.071766	0.0989978		0.0568845	0.0699685		0.0471	0.0194668		0.0513062	0.0290741
281 ms	0.0225983	0.0289785		0.885943	0.607783		0.200883	0.173218		0.061885	0.24997			0.107172	0.182883		0.107596	0.152383		0.0567142	0.04005		0.0682887	0.0546775			0.0723355	0.0993387		0.0570147	0.0703209		0.0470728	0.0193561		0.0513286	0.029132
282 ms	0.021453	0.0283623		0.925986	0.629196		0.213734	0.181126		0.0612935	0.25037			0.107233	0.182294		0.110865	0.159576		0.0567211	0.0398052		0.0683501	0.0538408			0.0718667	0.0995355		0.0574791	0.0705938		0.0469963	0.0190939		0.0515685	0.0287822
283 ms	0.021565	0.0277122		0.966518	0.650525		0.227933	0.189951		0.0624867	0.250563			0.106719	0.181807		0.114689	0.16724		0.0567282	0.0394419		0.06837	0.0536881			0.0713764	0.0990949		0.0577499	0.0699606		0.047654	0.0189464		0.0516192	0.0288553
284 ms	0.0208889	0.0271154		1.00756	0.672278		0.242655	0.200343		0.0620433	0.251006			0.105877	0.181141		0.11857	0.175066		0.0564974	0.0395065		0.0680774	0.0527841			0.0713186	0.0982381		0.0579684	0.0693946		0.0478602	0.0185083		0.0521623	0.0282591
285 ms	0.0213859	0.0265621		1.04904	0.693524		0.259039	0.211252		0.0632816	0.25124			0.105847	0.180885		0.122531	0.183213		0.0564399	0.03967		0.0678227	0.0521087			0.0714193	0.0973767		0.0582714	0.0690853		0.0479356	0.0180098		0.0518107	0.0288283
286 ms	0.0215794	0.0270202		1.09037	0.714582		0.275992	0.22377		0.0630127	0.251761			0.106216	0.180595		0.126689	0.191612		0.0564551	0.0394608		0.0675979	0.0517195			0.0716524	0.0966381		0.0589906	0.0687488		0.0478808	0.0173946		0.0513737	0.0291558
287 ms	0.0223178	0.0265692		1.1317	0.734918		0.294276	0.236765		0.064395	0.252061			0.105094	0.180404		0.131273	0.200441		0.0564422	0.0392219		0.067375	0.0512258			0.072008	0.0949978		0.0594854	0.0682078		0.047787	0.0172088		0.0510682	0.0283588
288 ms	0.0219867	0.0259245		1.17286	0.754973		0.313207	0.25091		0.0642277	0.25267			0.105115	0.180538		0.135571	0.209821		0.0563157	0.0390073		0.0670648	0.0508416			0.0725582	0.094997		0.0600233	0.0684388		0.0478296	0.0172136		0.0508523	0.0285528
289 ms	0.0232269	0.0264532		1.21383	0.774384		0.33328	0.265525		0.0657949	0.253097			0.105001	0.180699		0.140501	0.219504		0.0561277	0.0388469		0.0667717	0.0500139			0.0729017	0.094017		0.0603026	0.0678961		0.0480636	0.016679		0.0505651	0.0283754
290 ms	0.0230402	0.0263454		1.2545	0.793402		0.354084	0.28109		0.0656593	0.253798			0.105312	0.181016		0.145568	0.229426		0.0559547	0.038462		0.0662231	0.0494665			0.0736989	0.0939375		0.0604816	0.0682747		0.0473069	0.0163066		0.0506674	0.0286521
291 ms	0.0239767	0.0267681		1.29463	0.811455		0.376481	0.296784		0.0673096	0.254328			0.104721	0.180997		0.150386	0.239982		0.0559073	0.0379019		0.0659524	0.0489888			0.0735253	0.0944859		0.060511	0.0690896		0.0474687	0.0166662		0.0505768	0.0293955
292 ms	0.023733	0.0273031		1.33425	0.829063		0.399166	0.313306		0.0674381	0.255126			0.104769	0.181437		0.155778	0.250775		0.0556108	0.0379147		0.0659463	0.0484706			0.0735504	0.0950374		0.0610669	0.0695963		0.0469068	0.0168923		0.0504879	0.0289709
293 ms	0.0242064	0.0278073		1.37373	0.845717		0.422832	0.32999		0.0693046	0.255796			0.104272	0.181576		0.161202	0.262068		0.0555592	0.0377424		0.0655246	0.0479259			0.0730946	0.0941804		0.0606415	0.0697517		0.0475464	0.0165963		0.0510204	0.0285463
294 ms	0.0233728	0.0274468		1.41261	0.862035		0.447044	0.347054		0.0696085	0.256697			0.104718	0.181777		0.166444	0.274027		0.0553045	0.0375324		0.0653948	0.0476685			0.0724836	0.0937292		0.0604647	0.0698688		0.0473403	0.0166701		0.0517721	0.028355
295 ms	0.0238862	0.0284031		1.45094	0.877697		0.472509	0.364104		0.0716332	0.257469			0.105081	0.181853		0.172188	0.28621		0.055396	0.0374265		0.0654027	0.0475955			0.0716572	0.0922495		0.0601106	0.0691637		0.047034	0.0163658		0.0522975	0.0274612
296 ms	0.0228744	0.0281665		1.48878	0.892724		0.498613	0.381562		0.0721586	0.258479			0.105661	0.182037		0.177746	0.298998		0.0552705	0.0371315		0.0651827	0.0476964			0.071528	0.0911631		0.0601448	0.0692937		0.04692	0.0161315		0.0522112	0.027467
297 ms	0.0231502	0.0283001		1.52634	0.907172		0.525888	0.398631		0.0743949	0.259332			0.105097	0.182254		0.184291	0.311885		0.0552962	0.0372923		0.0650657	0.0473518			0.0709062	0.0892192		0.0604611	0.0689938		0.0472336	0.0158014		0.0524283	0.0265093
298 ms	0.0223545	0.0280672		1.56342	0.921523		0.553382	0.416081		0.0751143	0.260444			0.105795	0.182992		0.190884	0.325236		0.0552649	0.0373594		0.0647781	0.0471582			0.0707484	0.0872793		0.0607133	0.068324		0.0468956	0.0155467		0.0521052	0.0258407
299 ms	0.0225265	0.0278171		1.60012	0.935118		0.581878	0.433003		0.0774245	0.261383			0.106139	0.182941		0.197499	0.339018		0.0553995	0.0372703		0.0641962	0.0472616			0.0708184	0.0862962		0.0603843	0.0687971		0.0477629	0.0150133		0.0522392	0.0257439
300 ms	0.0217228	0.0272455		1.63621	0.94887		0.610844	0.450122		0.078254	0.262544			0.106328	0.184041		0.204424	0.353017		0.0553703	0.0372739		0.0641646	0.0470217			0.0701532	0.085996		0.0609302	0.069134		0.0474724	0.0142933		0.0516621	0.0261336
301 ms	0.0222982	0.0272707		1.67222	0.961881		0.640728	0.466972		0.0808608	0.263616			0.106861	0.184739		0.211449	0.36704		0.0552004	0.0372184		0.0641023	0.0466796			0.0706402	0.0853692		0.0609418	0.0694121		0.0466985	0.014341		0.0512928	0.0265657
302 ms	0.0218855	0.0267285		1.70802	0.974846		0.670541	0.484143		0.0820512	0.264933			0.107547	0.185966		0.218854	0.381273		0.0550241	0.0371269		0.0639461	0.0461869			0.0704403	0.0844683		0.0613549	0.0694668		0.046787	0.0146092		0.0508997	0.026882
303 ms	0.022489	0.0262666		1.74366	0.987591		0.701586	0.50078		0.0851091	0.26618			0.106979	0.186266		0.22609	0.395587		0.0551283	0.0372943		0.0639163	0.0457637			0.0710301	0.0830397		0.0611114	0.0691389		0.04729	0.0150587		0.0517635	0.0266855
304 ms	0.022511	0.026562		1.77888	1.00032		0.732749	0.517902		0.0868608	0.267783			0.107627	0.186229		0.233193	0.410145		0.0552576	0.0377074		0.0638071	0.0455583			0.0712374	0.0824146		0.0608644	0.0692012		0.0473125	0.0150202		0.0517558	0.0270355
305 ms	0.0232309	0.0265634		1.81405	1.01252		0.764653	0.534593		0.0904086	0.269303			0.106986	0.18608		0.240821	0.424762		0.0555618	0.0380053		0.0637152	0.0453563			0.0714903	0.0811025		0.0605089	0.0688557		0.0479902	0.0145161		0.0518894	0.0268308
306 ms	0.0230843	0.0264561		1.84931	1.02473		0.796816	0.551787		0.0926815	0.271215			0.106619	0.186596		0.24875	0.439365		0.055535	0.0379811		0.0631936	0.044893			0.0713206	0.0795757		0.061087	0.0684887		0.0475959	0.0146157		0.0515735	0.0273059
307 ms	0.0237015	0.0261204		1.88444	1.03659		0.830239	0.568515		0.0967799	0.273193			0.106833	0.18648		0.256663	0.454025		0.0555615	0.0379499		0.063084	0.0448156			0.0711949	0.0782498		0.0610836	0.0681078		0.0473497	0.0145901		0.0516221	0.0266707
308 ms	0.0235016	0.02649		1.91936	1.04853		0.86383	0.586052		0.0995725	0.27558			0.106187	0.186124		0.26463	0.468585		0.055558	0.0377148		0.0625344	0.0444816			0.0710959	0.0773709		0.0618373	0.0683035		0.0483671	0.0149399		0.0516785	0.0264614
309 ms	0.0237304	0.0261564		1.95442	1.06003		0.898733	0.603418		0.104212	0.278069			0.105723	0.185756		0.272449	0.483268		0.0556962	0.0376594		0.0623093	0.0443655			0.0709903	0.076265		0.0618924	0.0680909		0.0484562	0.0142867		0.0515548	0.0265055
310 ms	0.0233982	0.0263358		1.98932	1.07149		0.933719	0.621529		0.107565	0.281093			0.10552	0.186361		0.28093	0.497668		0.0557482	0.0379568		0.0618798	0.0445299			0.0703085	0.0759069		0.0621618	0.0679024		0.0482122	0.01405		0.0506489	0.0266262
311 ms	0.0236336	0.026038		2.0246	1.08263		0.969785	0.639591		0.112689	0.284196			0.105338	0.187048		0.28881	0.51216		0.0556627	0.0375555		0.0614994	0.0441049			0.0703263	0.0750837		0.0632878	0.0680634		0.0479407	0.0141458		0.0504732	0.0270905
312 ms	0.0229575	0.0260696		2.05983	1.09372		1.00625	0.658595		0.116487	0.287903			0.106071	0.187196		0.296806	0.526398		0.055285	0.0370123		0.0615093	0.0441125			0.0698853	0.0748066		0.0637183	0.0686884		0.0474456	0.0145285		0.050431	0.0270713
313 ms	0.0231773	0.0259193		2.09512	1.10455		1.04408	0.67749		0.122192	0.291771			0.105841	0.186308		0.304905	0.540415		0.0550805	0.0370175		0.0617959	0.0439962			0.0694746	0.0741878		0.0635944	0.0691075		0.047576	0.0141576		0.0506858	0.0264393
314 ms	0.022795	0.0266536		2.13075	1.11503		1.0824	0.69743		0.126709	0.296278			0.105847	0.185793		0.312749	0.554245		0.0553306	0.0372161		0.0616838	0.0438932			0.069771	0.0737952		0.0638687	0.0693921		0.0473348	0.014391		0.0512617	0.0272198
315 ms	0.0226839	0.0259331		2.16676	1.1253		1.12214	0.717163		0.133089	0.301036			0.106683	0.185936		0.320674	0.567752		0.055367	0.0371549		0.0618506	0.0437835			0.0687869	0.0732194		0.0637876	0.0690318		0.0472773	0.0143242		0.0515962	0.0271652
316 ms	0.0219315	0.0258358		2.20271	1.13569		1.16251	0.737724		0.138292	0.306548			0.10618	0.185096		0.328687	0.580742		0.0549479	0.0369738		0.0616133	0.043435			0.0682072	0.0727107		0.0639604	0.0698142		0.0462265	0.0145309		0.051019	0.0269436
317 ms	0.022464	0.0260888		2.23938	1.1455		1.20407	0.758322		0.145424	0.312287			0.106914	0.184182		0.336331	0.593725		0.0547436	0.0366751		0.0615112	0.0428004			0.0677455	0.0714815		0.0644151	0.0700862		0.045412	0.014236		0.0509904	0.0266757
318 ms	0.021722	0.0255121		2.27589	1.15536		1.2464	0.779797		0.151475	0.318871			0.106887	0.183381		0.344561	0.606164		0.0545027	0.0365603		0.061414	0.0427016			0.0669368	0.0710073		0.0636442	0.0698677		0.0457926	0.0134463		0.0505643	0.0261026
319 ms	0.0223492	0.0255363		2.31307	1.1649		1.29035	0.801194		0.159526	0.325807			0.106284	0.183045		0.352526	0.618372		0.0547412	0.0369224		0.0613271	0.0423285			0.0663956	0.0705348		0.0637928	0.0698257		0.0458278	0.0136847		0.0501373	0.0257682
320 ms	0.0221241	0.0255576		2.35038	1.17453		1.33515	0.8234		0.166675	0.333756			0.10663	0.183765		0.360163	0.630414		0.0550371	0.0367054		0.0610905	0.0423316			0.0656925	0.0698231		0.0635186	0.0693745		0.0455459	0.0136228		0.0498267	0.0258737
321 ms	0.0227286	0.025		2.38812	1.18401		1.3811	0.845644		0.175736	0.34206			0.10689	0.184114		0.368229	0.642074		0.0548631	0.0363197		0.0607029	0.0418882			0.0647743	0.0681537		0.0639233	0.0686417		0.0450831	0.0129648		0.0499213	0.0251963
322 ms	0.0229139	0.0254218		2.42604	1.1934		1.42765	0.868561		0.183812	0.351334			0.106127	0.183807		0.376262	0.653521		0.0545618	0.0362697		0.0604534	0.0418106			0.0645189	0.067189		0.0640569	0.0684533		0.0449269	0.0134104		0.0495423	0.0254364
323 ms	0.0238274	0.025342		2.46442	1.20255		1.4755	0.89111		0.194001	0.360897			0.106459	0.184309		0.384441	0.664818		0.0547539	0.0365425		0.0605069	0.0419171			0.0649112	0.0659498		0.0644553	0.0680896		0.0458199	0.012686		0.0502605	0.0255977
324 ms	0.023525	0.0247894		2.50307	1.21184		1.52402	0.91431		0.203211	0.371617			0.106011	0.1847		0.39239	0.675976		0.0549106	0.0363498		0.0603169	0.0419752			0.0645491	0.0661233		0.064445	0.0680962		0.0460884	0.0127927		0.0511708	0.0256346
325 ms	0.0244471	0.0254612		2.54248	1.22051		1.57381	0.936986		0.214489	0.382809			0.106696	0.184487		0.400494	0.686791		0.0550923	0.0363372		0.0605563	0.0419645			0.0649309	0.0647623		0.064379	0.0678451		0.0461809	0.0127143		0.0517192	0.0255326
326 ms	0.0236638	0.0247315		2.58207	1.2293		1.62402	0.95987		0.224801	0.394873			0.107027	0.184491		0.408372	0.697443		0.0550965	0.0361194		0.0600745	0.0415987			0.0648747	0.063666		0.0644119	0.0675467		0.0458569	0.0120342		0.0517802	0.0260288
327 ms	0.0241321	0.024768		2.62241	1.23743		1.67512	0.982249		0.237166	0.407365			0.10748	0.183481		0.41643	0.707802		0.0551181	0.0361098		0.059856	0.0409362			0.0652739	0.0625211		0.0655152	0.0676903		0.045999	0.0117958		0.0524881	0.0256545
328 ms	0.0235455	0.024881		2.66315	1.24543		1.72672	1.00432		0.248663	0.420801			0.107929	0.183006		0.423624	0.718356		0.0550551	0.035871		0.0600993	0.0409793			0.0659292	0.0613368		0.0653313	0.067469		0.0467375	0.0117599		0.0521153	0.0254914
329 ms	0.023798	0.0250076		2.70431	1.25308		1.77946	1.0257		0.262225	0.434602			0.109185	0.182762		0.431565	0.728501		0.0552211	0.0359916		0.0601605	0.0406417			0.0667458	0.05962		0.0654675	0.0668224		0.0465558	0.0110567		0.0523356	0.0249559
330 ms	0.0229675	0.024968		2.74586	1.26036		1.8326	1.04676		0.274888	0.449485			0.110173	0.18351		0.438908	0.738659		0.0551729	0.035788		0.0597432	0.0405833			0.0666705	0.0591197		0.0652383	0.0665693		0.0463834	0.0116656		0.0522773	0.0247438
331 ms	0.0232141	0.0252502		2.78794	1.26709		1.88663	1.06669		0.28961	0.464475			0.110807	0.183742		0.446558	0.748357		0.0554321	0.0358729		0.0595887	0.0403177			0.0663885	0.0576314		0.065334	0.0665436		0.0469691	0.0113468		0.0513383	0.0237774
332 ms	0.0224576	0.0249712		2.82997	1.27366		1.94088	1.08618		0.303657	0.480487			0.111064	0.184206		0.453448	0.758327		0.0556379	0.0361083		0.0593856	0.039937			0.0660894	0.0575255		0.0657022	0.0668483		0.0463812	0.0119606		0.0514492	0.0242589
333 ms	0.0231732	0.0258885		2.87251	1.27941		1.99631	1.10429		0.319854	0.496877			0.111653	0.185751		0.460325	0.768077		0.0557817	0.0362081		0.0592987	0.0401559			0.0664239	0.0576211		0.066545	0.0670623		0.0467414	0.0117428		0.0513899	0.0243569
334 ms	0.0224711	0.0255455		2.91501	1.28484		2.05189	1.12198		0.335138	0.514017			0.11239	0.187946		0.466824	0.777874		0.0559557	0.0362485		0.0594311	0.0400353			0.0661665	0.0565936		0.0657886	0.0665057		0.0466004	0.0119302		0.0513636	0.0245236
335 ms	0.0228848	0.0251114		2.95765	1.28961		2.10843	1.13845		0.352604	0.531484			0.112581	0.19056		0.474396	0.786953		0.0561712	0.0366958		0.059344	0.0395348			0.0657671	0.0575249		0.0656922	0.0669713		0.0465461	0.0122839		0.0512551	0.0250851
336 ms	0.0225406	0.0249042		3.00049	1.2938		2.16509	1.1542		0.369308	0.549604			0.112545	0.192956		0.48088	0.796083		0.0563569	0.036714		0.0593539	0.0399247			0.0651123	0.0581559		0.0659068	0.0672383		0.0468556	0.0123392		0.0511769	0.0253123
337 ms	0.023446	0.0253743		3.04357	1.29726		2.22234	1.16885		0.388168	0.567867			0.112049	0.194621		0.487584	0.804995		0.0565057	0.0365584		0.0592007	0.0398972			0.0649184	0.0579213		0.0661425	0.0676113		0.0467746	0.011934		0.0513993	0.0256171
338 ms	0.0233115	0.024946		3.0865	1.30039		2.27972	1.18305		0.406225	0.586758			0.112488	0.19749		0.493887	0.813899		0.0567197	0.0367571		0.0595282	0.0398366			0.0652071	0.0588462		0.0663865	0.0679876		0.046426	0.0116565		0.0515406	0.0260884
339 ms	0.0242575	0.0250901		3.12979	1.30279		2.33776	1.19601		0.426368	0.605736			0.113268	0.201156		0.500925	0.82221		0.0568097	0.0369094		0.0593228	0.0400909			0.0650124	0.0591674		0.0668106	0.0676664		0.0469276	0.0123645		0.0510687	0.0259334
340 ms	0.0240692	0.0244957		3.17291	1.30508		2.39554	1.20863		0.44567	0.625301			0.11459	0.203762		0.507558	0.8304		0.0563626	0.0372009		0.0594066	0.0398616			0.0652117	0.0588152		0.0664048	0.0675586		0.0462324	0.0127924		0.0514225	0.0260976
341 ms	0.0252293	0.0254373		3.21633	1.30653		2.4539	1.21993		0.467149	0.644901			0.115184	0.206659		0.514463	0.838109		0.0564477	0.0372499		0.0593177	0.0399061			0.0655838	0.0593702		0.0665216	0.0676666		0.0465138	0.0133124		0.0507438	0.0259419
342 ms	0.0251086	0.0255234		3.25957	1.30786		2.51196	1.23085		0.487897	0.665091			0.115277	0.209366		0.520692	0.845788		0.0564916	0.0368818		0.0588854	0.0397661			0.0661331	0.0579895		0.0669513	0.0672657		0.0466425	0.0125158		0.0502509	0.0254711
343 ms	0.0258163	0.0260675		3.30296	1.30862		2.57072	1.24069		0.510774	0.685309			0.11578	0.213021		0.526377	0.853373		0.0566237	0.0370954		0.0586431	0.0394794			0.0663201	0.0580198		0.0674068	0.0675829		0.0465621	0.0126969		0.0498992	0.0255355
344 ms	0.0255467	0.0267264		3.34615	1.30929		2.62925	1.25039		0.532914	0.706166			0.116752	0.216485		0.532317	0.860408		0.0573307	0.0373182		0.0586615	0.0392901			0.0663291	0.0574823		0.0677844	0.0668734		0.0467465	0.0133532		0.0501016	0.025123
345 ms	0.0259723	0.0274182		3.38944	1.30922		2.68808	1.25879		0.55713	0.727071			0.117173	0.219978		0.538112	0.867164		0.057183	0.0372073		0.0583717	0.0389187			0.0668513	0.0566096		0.0676031	0.0663861		0.0469287	0.0141756		0.0505294	0.0249672
346 ms	0.0253034	0.0273295		3.43244	1.30918		2.74653	1.26681		0.580676	0.748402			0.118304	0.222774		0.54327	0.873667		0.0572929	0.0375352		0.0583759	0.0385717			0.0668283	0.0565071		0.0677162	0.0664656		0.0462826	0.0130371		0.0509037	0.0251186
347 ms	0.0257366	0.0283679		3.47546	1.3085		2.805	1.27378		0.606316	0.769677			0.118582	0.226496		0.548925	0.879772		0.0580185	0.0375544		0.058215	0.0386975			0.0663537	0.0556299		0.0675998	0.066714		0.0469016	0.0125753		0.0504236	0.0243078
348 ms	0.0249813	0.02874		3.51799	1.30795		2.86284	1.28049		0.63125	0.791558			0.119511	0.230015		0.554498	0.885592		0.05797	0.0375759		0.0581397	0.0385381			0.0654354	0.0547917		0.0682609	0.0667995		0.0464272	0.012008		0.0506132	0.0241202
349 ms	0.0251036	0.0289652		3.56039	1.30692		2.92051	1.28625		0.658154	0.813176			0.120877	0.232766		0.559568	0.891283		0.0584731	0.0382094		0.0580743	0.038377			0.065106	0.0551887		0.0683603	0.0672383		0.0466884	0.0117851		0.0511227	0.0236395
350 ms	0.0246592	0.0289109		3.60233	1.30592		2.97702	1.29166		0.68433	0.835183			0.120834	0.235708		0.565287	0.896556		0.0589272	0.0385375		0.0580483	0.0382211			0.0657075	0.0548616		0.0685334	0.0666197		0.0467183	0.0118711		0.0512913	0.0238695
351 ms	0.0250104	0.0282812		3.64396	1.30454		3.03316	1.29589		0.712428	0.856753			0.120883	0.238372		0.570494	0.90178		0.0588981	0.0384705		0.05816	0.0381197			0.0655554	0.0544786		0.06881	0.066825		0.0474156	0.0110855		0.0510214	0.0237395
352 ms	0.0248895	0.0286627		3.68507	1.30318		3.08826	1.30008		0.739653	0.878539			0.121387	0.241135		0.575902	0.90665		0.059191	0.0385143		0.0578365	0.0382748			0.0653449	0.0543459		0.0693563	0.0664918		0.0476936	0.0104874		0.0509528	0.0237736
353 ms	0.0259391	0.0297254		3.72569	1.3014		3.14273	1.30332		0.768754	0.899946			0.120795	0.244267		0.581226	0.911382		0.0591185	0.0381471		0.0576208	0.0383733			0.0656409	0.0531644		0.0696309	0.0660195		0.0484806	0.0110729		0.0506176	0.0233928
354 ms	0.0259157	0.0293372		3.76563	1.29968		3.19606	1.3066		0.797021	0.921552			0.120684	0.246869		0.586394	0.915912		0.0589819	0.0379403		0.0576737	0.0381674			0.0652479	0.0540583		0.0700666	0.0660063		0.0488048	0.0114786		0.0515404	0.0239456
355 ms	0.0268728	0.0289275		3.8051	1.29745		3.24871	1.30904		0.827052	0.942372			0.119706	0.249228		0.591562	0.92019		0.059107	0.0378861		0.0573203	0.0382958			0.0660549	0.0544483		0.0703591	0.0660793		0.0497037	0.0120784		0.051208	0.0238857
356 ms	0.0273813	0.0293338		3.84386	1.29528		3.30012	1.3114		0.856163	0.96326			0.119709	0.252028		0.596797	0.924126		0.0589269	0.0376834		0.0575449	0.0381384			0.0662483	0.0537318		0.0707572	0.0653692		0.0496609	0.0122571		0.0515768	0.0239972
357 ms	0.0282645	0.0291299		3.88199	1.29259		3.35096	1.31285		0.886895	0.983414			0.119671	0.254653		0.602416	0.927669		0.0591636	0.0376283		0.057302	0.0379572			0.0658156	0.0532842		0.0704343	0.0657405		0.0500101	0.0125596		0.0514002	0.0232104
358 ms	0.0281004	0.0289991		3.91939	1.28996		3.40042	1.31458		0.916637	1.00355			0.120235	0.2573		0.608177	0.930892		0.0589706	0.0375497		0.057113	0.0379685			0.0652621	0.0537502		0.0704169	0.0663485		0.0494824	0.012448		0.0515858	0.0235385
359 ms	0.0286974	0.0286064		3.95605	1.28709		3.44913	1.31541		0.948136	1.02304			0.120725	0.25973		0.613787	0.933979		0.0590406	0.0375095		0.0571865	0.0380045			0.0658587	0.0528632		0.0709556	0.0665577		0.0491698	0.0123641		0.0516476	0.0235664
360 ms	0.0278364	0.0271522		3.99202	1.28403		3.49645	1.31661		0.97839	1.0423			0.120586	0.261982		0.619017	0.936947		0.0595184	0.037615		0.0574517	0.0380362			0.0654024	0.0527127		0.0710133	0.0673242		0.0492673	0.0121415		0.0523354	0.0233118
361 ms	0.0281395	0.0262662		4.02718	1.28073		3.543	1.31697		1.01029	1.06075			0.120628	0.264153		0.624256	0.939765		0.0599172	0.0378566		0.0574187	0.0381111			0.0659287	0.0519821		0.0720348	0.0679225		0.0492258	0.0122673		0.0518121	0.0230496
362 ms	0.0277486	0.0267962		4.06152	1.27731		3.58823	1.3174		1.04104	1.07919			0.121389	0.266469		0.629603	0.942273		0.0606022	0.0382766		0.0573171	0.0378297			0.0657734	0.0515826		0.0727945	0.0683047		0.0484557	0.0122843		0.0521121	0.0228143
363 ms	0.0274421	0.0259981		4.09516	1.27348		3.63264	1.31715		1.07337	1.09692			0.121442	0.26825		0.635439	0.944538		0.0610196	0.0384251		0.0573494	0.0379459			0.065519	0.051557		0.0735379	0.0695434		0.0487623	0.0120761		0.0515229	0.0225416
364 ms	0.026564	0.0255613		4.12781	1.26988		3.67549	1.31715		1.10461	1.11456			0.122121	0.26958		0.640312	0.946999		0.0613418	0.0383348		0.0574565	0.0380873			0.0650186	0.0511395		0.0744706	0.0708017		0.0487492	0.0119868		0.0519649	0.0223166
365 ms	0.0266721	0.0249065		4.15965	1.26592		3.71747	1.3164		1.13739	1.13145			0.122438	0.271627		0.645617	0.949254		0.061959	0.03862		0.0576844	0.038017			0.0653404	0.0502679		0.0753349	0.0708609		0.0488716	0.0121584		0.0521341	0.0221203
366 ms	0.0262601	0.0251916		4.19064	1.26203		3.75805	1.31592		1.16891	1.14829			0.121594	0.272982		0.651322	0.951197		0.0624327	0.0387475		0.0578918	0.0379275			0.0640667	0.05071		0.0760247	0.0716479		0.0491844	0.0123932		0.0520151	0.0221436
367 ms	0.0267904	0.0252712		4.22089	1.25804		3.79779	1.31455		1.20201	1.1645			0.122127	0.274738		0.65725	0.953061		0.0627434	0.0388234		0.0576378	0.0377205			0.0643539	0.0507082		0.0768123	0.0719628		0.048678	0.013079		0.0515282	0.0219975
368 ms	0.0265579	0.025534		4.25035	1.25407		3.83611	1.31352		1.23379	1.18072			0.122144	0.276315		0.663001	0.954791		0.0628518	0.0390932		0.0578552	0.0377427			0.0640612	0.0498546		0.0771565	0.0718151		0.0488078	0.0133203		0.0513728	0.021602
369 ms	0.0269601	0.0242699		4.27907	1.25032		3.87354	1.31192		1.26699	1.19618			0.121838	0.277784		0.668395	0.956759		0.0630282	0.0392635		0.0580994	0.0376488			0.0643185	0.0494419		0.0770232	0.0727422		0.0497497	0.0136636		0.0516612	0.0217226
370 ms	0.0273988	0.0244135		4.30696	1.24663		3.90958	1.31062		1.29893	1.21161			0.122369	0.279493		0.67433	0.958314		0.0632326	0.0393013		0.05773	0.0373032			0.0645626	0.0492074		0.0780232	0.0728908		0.049324	0.0136741		0.0517523	0.0217344
371 ms	0.0283684	0.0239843		4.33436	1.2427		3.94481	1.30879		1.33216	1.22632			0.122287	0.280844		0.680494	0.959757		0.0632591	0.0395465		0.0577556	0.0374181			0.0643144	0.048409		0.0788422	0.0730915		0.0496525	0.0135032		0.0519244	0.0219087
372 ms	0.0286465	0.0238372		4.36099	1.23896		3.97886	1.3071		1.36395	1.24095			0.122469	0.281851		0.686519	0.960989		0.0635346	0.0399273		0.0575867	0.0372332			0.0640933	0.0487928		0.0794384	0.0743092		0.0496601	0.0135338		0.051377	0.0224118
373 ms	0.029646	0.0233893		4.38701	1.23515		4.01212	1.30496		1.39704	1.25473			0.124013	0.282959		0.692282	0.962343		0.0639737	0.0401745		0.0574664	0.0373509			0.0650734	0.0485579		0.0799148	0.0756412		0.0500229	0.0132443		0.0514347	0.0225186
374 ms	0.0304267	0.0243957		4.41229	1.23146		4.04402	1.30344		1.4287	1.2683			0.123961	0.283437		0.69879	0.963276		0.0646117	0.0403493		0.0579449	0.0378027			0.0652708	0.0487672		0.0811716	0.0760955		0.0504702	0.0124045		0.0515357	0.0227396
375 ms	0.031352	0.0246172		4.43706	1.22749		4.07525	1.30129		1.46156	1.28107			0.124745	0.28362		0.70546	0.964085		0.0652228	0.0407207		0.0579397	0.0374825			0.0647178	0.0484467		0.0814804	0.0771437		0.0506048	0.0121707		0.0515388	0.0230454
376 ms	0.0314418	0.0253489		4.46104	1.22366		4.10525	1.29961		1.49293	1.29366			0.12544	0.284055		0.712421	0.964626		0.0658451	0.041134		0.0580997	0.0376216			0.0640083	0.0478252		0.0823128	0.078037		0.0496932	0.011757		0.0518219	0.0233355
377 ms	0.0323958	0.0265579		4.48455	1.21963		4.13454	1.29749		1.52544	1.30528			0.125118	0.284075		0.719026	0.965266		0.066414	0.0411998		0.0582364	0.0378169			0.0643954	0.0482523		0.0830318	0.0797014		0.0498577	0.0120743		0.0522996	0.023243
378 ms	0.0324207	0.0277212		4.50762	1.21583		4.16272	1.29578		1.55644	1.31671			0.125109	0.284351		0.725545	0.965778		0.0670843	0.0414031		0.0583216	0.0376154			0.064525	0.0482391		0.0837811	0.080723		0.049731	0.0122463		0.0520741	0.0232121
379 ms	0.033342	0.028871		4.53006	1.21205		4.19018	1.29372		1.58866	1.32716			0.125158	0.284349		0.731918	0.966525		0.0676806	0.0413677		0.0585053	0.0373572			0.0645889	0.0474208		0.0845467	0.0818277		0.0498158	0.0126619		0.0525157	0.0228388
380 ms	0.0331221	0.0296684		4.55187	1.20831		4.21645	1.29213		1.61932	1.33753			0.12513	0.284167		0.738523	0.967106		0.0680766	0.0417338		0.0588549	0.0376127			0.0637773	0.0476255		0.0856325	0.0828073		0.0496115	0.0130697		0.0526793	0.0231692
381 ms	0.033739	0.0300914		4.5731	1.20469		4.24219	1.28997		1.65107	1.34693			0.12573	0.284047		0.745038	0.967853		0.0683374	0.042035		0.0583668	0.0372501			0.0636153	0.0472208		0.0860443	0.0846337		0.0499599	0.0133842		0.0530338	0.0236656
382 ms	0.0340095	0.0309231		4.59352	1.2015		4.26674	1.28842		1.68132	1.35608			0.125415	0.284089		0.751537	0.968672		0.0690687	0.0421033		0.0585655	0.0374438			0.0638331	0.0472044		0.0878626	0.0866803		0.0499848	0.0132494		0.0532978	0.023587
383 ms	0.0354549	0.0321828		4.61345	1.19824		4.29079	1.28623		1.71262	1.36433			0.124514	0.283873		0.758261	0.969583		0.0694304	0.0421551		0.0584957	0.0373971			0.0641274	0.0473419		0.0894192	0.0884966		0.0506118	0.0131935		0.0531765	0.023846
384 ms	0.0359976	0.032454		4.63252	1.19542		4.31384	1.28446		1.74229	1.37243			0.124643	0.283615		0.764862	0.970583		0.0700178	0.0424498		0.0585803	0.0372687			0.0639774	0.0462839		0.0907924	0.0902143		0.050761	0.0133601		0.053175	0.023869
385 ms	0.0378044	0.0330898		4.65058	1.19255		4.33639	1.28216		1.77305	1.37959			0.124861	0.283346		0.772024	0.971487		0.0706161	0.0427838		0.058531	0.0372963			0.064164	0.0460578		0.0919137	0.0924141		0.050691	0.0132199		0.0530904	0.0244355
386 ms	0.0388861	0.0339843		4.66793	1.18993		4.35806	1.28033		1.80214	1.38667			0.124874	0.282802		0.779676	0.972164		0.0710589	0.0429178		0.0583549	0.0374939			0.064267	0.0458415		0.0931288	0.093843		0.0504171	0.0128801		0.0536689	0.0238861
387 ms	0.0413489	0.0349187		4.68452	1.18755		4.37933	1.27788		1.8323	1.39274			0.123994	0.282368		0.787182	0.973223		0.0716948	0.0430191		0.0579687	0.0371895			0.0650444	0.0446663		0.0946175	0.0966041		0.0506368	0.0126618		0.0537288	0.0235103
388 ms	0.0432856	0.0366705		4.70037	1.1853		4.39973	1.27595		1.86082	1.39878			0.123386	0.281797		0.794461	0.974319		0.0724113	0.0434551		0.0583516	0.0370119			0.0644934	0.0446099		0.0954223	0.0990538		0.0509459	0.0127164		0.0533681	0.0230303
389 ms	0.0463385	0.0389737		4.71568	1.18305		4.41979	1.27337		1.89038	1.40391			0.123109	0.280643		0.80279	0.97491		0.0730101	0.0440196		0.0581885	0.0370707			0.0639207	0.0443395		0.0960063	0.100723		0.0509799	0.0135885		0.0532088	0.0234824
390 ms	0.0483678	0.0404256		4.73015	1.18125		4.43895	1.27131		1.91833	1.40902			0.123083	0.279111		0.810221	0.976007		0.0738814	0.0445921		0.0587106	0.0372168			0.0642451	0.0437698		0.0975663	0.10297		0.0510785	0.013473		0.0529544	0.0233642
391 ms	0.0512422	0.0423973		4.74415	1.17947		4.45783	1.26876		1.94733	1.41336			0.122767	0.277782		0.81837	0.977097		0.0745336	0.0453533		0.0589931	0.0376637			0.0635904	0.0434463		0.0983993	0.104606		0.0513008	0.013691		0.0528744	0.0232986
392 ms	0.0537245	0.0460115		4.75765	1.17759		4.47586	1.2667		1.97474	1.41777			0.122378	0.275819		0.826767	0.978143		0.0754056	0.0458784		0.0588492	0.0374755			0.0635029	0.0432139		0.0996452	0.107138		0.0518382	0.013686		0.0531331	0.0228394
393 ms	0.0570015	0.048684		4.77062	1.1758		4.49349	1.26414		2.00316	1.4214			0.122132	0.274021		0.834726	0.979527		0.0766453	0.0470742		0.0591676	0.0377846			0.063551	0.0423575		0.100536	0.109926		0.0523536	0.0141869		0.0523993	0.0228305
394 ms	0.0594957	0.0521937		4.78303	1.17408		4.51039	1.26207		2.03	1.42515			0.122009	0.271798		0.842668	0.980662		0.0778588	0.0487434		0.0592181	0.0377376			0.0625753	0.042839		0.101651	0.111915		0.0522091	0.0138028		0.0522826	0.0227457
395 ms	0.062595	0.0552052		4.79503	1.17248		4.52698	1.25947		2.05778	1.42815			0.121092	0.269996		0.851045	0.981823		0.0794083	0.0504091		0.0588365	0.0373819			0.0623284	0.0421875		0.103717	0.114469		0.0517269	0.0137021		0.051931	0.0229087
396 ms	0.064935	0.0587585		4.80658	1.1711		4.543	1.25752		2.08394	1.43138			0.120337	0.268233		0.85846	0.983811		0.0808826	0.0521307		0.0591941	0.0376724			0.0628878	0.0417542		0.105125	0.116895		0.0519471	0.013824		0.0522604	0.0227274
397 ms	0.0687188	0.0627235		4.81723	1.16933		4.55802	1.25483		2.11076	1.43369			0.121321	0.266346		0.867178	0.985083		0.0822884	0.0543782		0.0588545	0.0376939			0.0622323	0.0411389		0.10636	0.119066		0.0515759	0.0137558		0.0523902	0.0229022
398 ms	0.0717896	0.067627		4.82776	1.16803		4.57259	1.25338		2.13524	1.43666			0.120359	0.263892		0.875341	0.986819		0.0841998	0.0567637		0.0589213	0.0375818			0.0617874	0.0411754		0.106929	0.122021		0.0516767	0.0134387		0.0524796	0.0232241
399 ms	0.0773051	0.0717324		4.8381	1.16581		4.58749	1.24971		2.16304	1.43773			0.120202	0.26215		0.883648	0.988565		0.0857574	0.059548		0.0593321	0.0379426			0.0613144	0.0414879		0.108469	0.124124		0.0507298	0.0129025		0.0525939	0.0239687
400 ms	0.0813081	0.077367		4.84817	1.16428		4.60134	1.2479		2.18727	1.43996			0.11971	0.260081		0.891808	0.990489		0.0873513	0.0621132		0.059295	0.0378241			0.0608879	0.0417378		0.110182	0.12707		0.0509682	0.0133895		0.0529111	0.0241562
401 ms	0.0874856	0.0832348		4.8579	1.16248		4.61489	1.24524		2.21285	1.44115			0.118993	0.25761		0.900215	0.992618		0.0888038	0.0650782		0.0594198	0.0379518			0.060756	0.041056		0.111277	0.129502		0.0514657	0.0135556		0.0526488	0.0245755
402 ms	0.093415	0.0902508		4.86774	1.16077		4.62815	1.24314		2.23721	1.44264			0.118983	0.254822		0.908358	0.994939		0.0902868	0.0683944		0.0597699	0.0383005			0.0609864	0.0400819		0.112727	0.13203		0.0519921	0.0138791		0.0524519	0.0246798
403 ms	0.101748	0.0979076		4.87727	1.15861		4.64103	1.24041		2.263	1.44325			0.118371	0.252253		0.916947	0.996859		0.0919541	0.0717294		0.0591473	0.0380039			0.0609121	0.0399948		0.114	0.135341		0.0522644	0.0137345		0.0520888	0.0250087
404 ms	0.110515	0.107139		4.8879	1.15682		4.65458	1.23856		2.28832	1.44437			0.116324	0.249297		0.925437	0.998941		0.0940619	0.0757218		0.0594734	0.0377595			0.0609025	0.0399855		0.114762	0.138863		0.0525869	0.0137763		0.0522305	0.0251643
405 ms	0.122548	0.116963		4.8982	1.15449		4.66789	1.23555		2.31633	1.44411			0.116527	0.24638		0.93368	1.00126		0.0958368	0.0797325		0.0596145	0.0379832			0.0612796	0.0383905		0.117013	0.141343		0.0526821	0.0131463		0.0518275	0.0243967
406 ms	0.135039	0.129544		4.90922	1.15342		4.68114	1.23504		2.34212	1.44536			0.116536	0.243202		0.942161	1.00342		0.0982034	0.0843057		0.0597206	0.0376176			0.0615327	0.0369356		0.118672	0.145198		0.0536301	0.0137138		0.0513947	0.0234602
407 ms	0.153452	0.143284		4.92049	1.15106		4.69468	1.23253		2.37275	1.4447			0.116135	0.239841		0.950691	1.00561		0.100451	0.0891993		0.0597785	0.0377178			0.0614323	0.0368005		0.119932	0.148519		0.0538213	0.0129577		0.0507287	0.0237434
408 ms	0.174098	0.16133		4.93328	1.14932		4.70904	1.23168		2.40393	1.44504			0.116148	0.237219		0.959397	1.00756		0.102995	0.093994		0.0601901	0.038228			0.0616857	0.0355947		0.12159	0.151977		0.0540844	0.0129324		0.0509715	0.0226513
409 ms	0.203539	0.182262		4.94708	1.14611		4.72468	1.22875		2.44213	1.44332			0.116213	0.234092		0.968318	1.00947		0.105753	0.098899		0.0603778	0.0386367			0.0610192	0.0353801		0.122883	0.155384		0.0539266	0.0130468		0.0513419	0.022061
410 ms	0.238435	0.210638		4.9625	1.14355		4.74082	1.22764		2.48126	1.44291			0.116184	0.230896		0.977073	1.01169		0.10841	0.104287		0.0607538	0.0384245			0.0608872	0.0344531		0.12448	0.158289		0.0538026	0.0130254		0.0514175	0.0210967
411 ms	0.28367	0.246311		4.97888	1.13977		4.75793	1.22521		2.52695	1.44131			0.116483	0.228461		0.985887	1.01421		0.111305	0.109706		0.0605494	0.0384091			0.0611811	0.033412		0.12626	0.161367		0.0542839	0.0129109		0.0514392	0.0202064
412 ms	0.338974	0.292988		4.9972	1.13548		4.77626	1.22304		2.57685	1.44053			0.115189	0.225859		0.995065	1.0161		0.114482	0.11545		0.0605662	0.0384403			0.0611969	0.0329849		0.127155	0.164626		0.0544588	0.0138638		0.0515924	0.0202679
413 ms	0.407191	0.349976		5.01622	1.13001		4.79499	1.2199		2.63307	1.43947			0.114146	0.223395		1.00385	1.01852		0.117585	0.121015		0.0603692	0.0386253			0.0608835	0.032886		0.128144	0.167981		0.0544816	0.0141005		0.0513764	0.0207167
414 ms	0.487319	0.420229		5.0372	1.12432		4.81537	1.2173		2.69346	1.44038			0.113548	0.221254		1.01324	1.02056		0.121067	0.126492		0.0604416	0.0382751			0.0609186	0.0324315		0.130266	0.171166		0.0544358	0.0146651		0.0520958	0.0201593
415 ms	0.581944	0.50079		5.0584	1.11731		4.83606	1.21329		2.75978	1.44168			0.112264	0.218531		1.02247	1.02293		0.124345	0.132339		0.0603366	0.0381872			0.0602884	0.0327948		0.131296	0.175207		0.0540215	0.0151808		0.0513211	0.0203789
416 ms	0.685653	0.594714		5.0803	1.11108		4.85676	1.21143		2.82569	1.44756			0.111279	0.216074		1.03147	1.02527		0.12782	0.138486		0.0603839	0.038197			0.0610098	0.0329058		0.13248	0.17846		0.0542303	0.0150897		0.0513949	0.0210952
417 ms	0.802021	0.695733		5.10219	1.1036		4.8778	1.20792		2.89629	1.45388			0.111006	0.213633		1.04045	1.02776		0.131483	0.144955		0.0604004	0.0384348			0.0611368	0.0331759		0.134528	0.182307		0.0545449	0.015633		0.0516009	0.0220368
418 ms	0.924984	0.806128		5.12431	1.09684		4.89876	1.20621		2.96478	1.46479			0.110368	0.210953		1.04934	1.03006		0.135408	0.151106		0.0606245	0.0387508			0.0607077	0.0337076		0.135857	0.185976		0.0544374	0.0150987		0.0508918	0.0228611
419 ms	1.05585	0.918761		5.14618	1.08946		4.92005	1.20322		3.03555	1.47577			0.110051	0.208531		1.05847	1.03262		0.139208	0.15755		0.0607542	0.0388523			0.0604383	0.0343979		0.137801	0.189566		0.054605	0.0146448		0.0510439	0.0232477
420 ms	1.18728	1.03596		5.16749	1.08367		4.94031	1.20261		3.10099	1.49133			0.109469	0.206266		1.06732	1.03526		0.143105	0.164049		0.060957	0.0390788			0.0612042	0.0347395		0.139131	0.192816		0.0549314	0.0145528		0.0511054	0.0229852
421 ms	1.32031	1.15131		5.18798	1.07803		4.96003	1.20144		3.16514	1.50699			0.109063	0.203656		1.07622	1.03821		0.146839	0.171205		0.0610846	0.0394389			0.0613312	0.0345276		0.140541	0.195903		0.055543	0.01439		0.0504458	0.0232727
422 ms	1.4508	1.26495		5.20783	1.0733		4.97891	1.20133		3.22476	1.52446			0.109661	0.20164		1.0854	1.04095		0.151319	0.178391		0.0610286	0.039427			0.0620387	0.0346491		0.142095	0.199332		0.0559814	0.0141526		0.0510736	0.0234093
423 ms	1.579	1.37384		5.22639	1.06924		4.99666	1.20099		3.2819	1.54139			0.109002	0.19977		1.09477	1.04394		0.155693	0.185309		0.0611488	0.039156			0.0613114	0.034353		0.144068	0.202205		0.0559114	0.0146651		0.0508901	0.0232366
424 ms	1.70134	1.47842		5.24401	1.06616		5.01356	1.2014		3.33476	1.5596			0.107954	0.197568		1.10407	1.047		0.160007	0.191947		0.0613881	0.0391837			0.0614296	0.0349507		0.145401	0.20512		0.0557486	0.0145743		0.0511868	0.023444
425 ms	1.82018	1.57543		5.2604	1.06345		5.02943	1.20094		3.38654	1.57607			0.10807	0.195494		1.11338	1.05033		0.164124	0.198844		0.0618558	0.0390207			0.0615819	0.0352465		0.146952	0.207115		0.0555948	0.0144177		0.052103	0.0235701
426 ms	1.93126	1.669		5.2756	1.06212		5.0436	1.20229		3.43247	1.59537			0.108234	0.192931		1.12263	1.05369		0.168705	0.205923		0.0617968	0.039044			0.0622446	0.0355378		0.148574	0.210107		0.055647	0.0155872		0.0517717	0.0236285
427 ms	2.03937	1.75429		5.28966	1.06016		5.05701	1.2016		3.47934	1.61165			0.10852	0.190341		1.13243	1.05691		0.173727	0.213367		0.0618245	0.0390567			0.0610703	0.0350392		0.150385	0.212177		0.0558708	0.0157405		0.0526201	0.0232658
428 ms	2.1411	1.83679		5.30264	1.05897		5.06933	1.20187		3.5221	1.63009			0.108075	0.187943		1.14191	1.06015		0.17898	0.220614		0.0621604	0.0394163			0.0613909	0.0356653		0.152309	0.214451		0.0554597	0.0160121		0.0532815	0.0241419
429 ms	2.24103	1.91166		5.31498	1.05709		5.08134	1.20046		3.56649	1.64567			0.107539	0.185976		1.15171	1.06376		0.184011	0.228172		0.06243	0.0395496			0.0607442	0.035507		0.15416	0.216929		0.0556327	0.0160226		0.0534043	0.024365
430 ms	2.33449	1.98474		5.32615	1.05611		5.09173	1.20047		3.60633	1.66372			0.107559	0.184586		1.16132	1.06742		0.188924	0.235846		0.0625125	0.0397684			0.0610681	0.0358663		0.156202	0.219929		0.0556739	0.0160048		0.0537167	0.0243976
431 ms	2.42511	2.05219		5.33661	1.05468		5.10168	1.19921		3.64629	1.67962			0.107806	0.182557		1.17118	1.07115		0.194612	0.243644		0.0627288	0.040316			0.0602249	0.0353797		0.157567	0.222445		0.0559904	0.0167231		0.0534626	0.0236039
432 ms	2.51061	2.11607		5.34609	1.05312		5.11052	1.19814		3.68336	1.69556			0.10731	0.180397		1.18171	1.07452		0.200181	0.251541		0.0624642	0.0404208			0.0597993	0.035333		0.159867	0.225768		0.0566025	0.0171884		0.0534374	0.0233387
433 ms	2.59245	2.17449		5.35431	1.05147		5.1184	1.1963		3.71943	1.70929			0.10656	0.178506		1.192	1.07829		0.205905	0.259371		0.0626978	0.0404632			0.0594772	0.0359536		0.161833	0.228595		0.0568929	0.0163922		0.0535423	0.0238124
434 ms	2.66881	2.22893		5.36172	1.04986		5.1256	1.1947		3.75228	1.72268			0.106531	0.17673		1.20251	1.08187		0.211649	0.266944		0.0630231	0.0404164			0.0599686	0.0364793		0.16398	0.231925		0.0567093	0.0159298		0.053753	0.0245948
435 ms	2.74143	2.27636		5.36779	1.04802		5.13154	1.19222		3.7844	1.73267			0.106111	0.174708		1.21317	1.08571		0.217671	0.274641		0.063034	0.0404879			0.0591919	0.0369161		0.165777	0.235474		0.0569886	0.0164574		0.0539096	0.0246642
436 ms	2.80596	2.32141		5.37247	1.04701		5.13596	1.19092		3.81088	1.74368			0.105892	0.172603		1.22329	1.08981		0.223466	0.28204		0.0631223	0.0403923			0.0599659	0.0371719		0.168322	0.237523		0.0564353	0.0161212		0.0545328	0.0247031
437 ms	2.86743	2.35819		5.37585	1.04502		5.13948	1.1878		3.83766	1.74982			0.105902	0.169805		1.23373	1.09394		0.22979	0.289678		0.0633612	0.0402173			0.0598226	0.037302		0.170718	0.240898		0.0571889	0.0162683		0.0547923	0.0249696
438 ms	2.92182	2.392		5.37815	1.0435		5.14168	1.18575		3.85975	1.75635			0.105922	0.167856		1.24449	1.09769		0.236007	0.297745		0.0637397	0.0400058			0.0608368	0.0375996		0.173154	0.244307		0.0570235	0.0164886		0.0552162	0.025546
439 ms	2.97383	2.41812		5.37964	1.04143		5.14358	1.18235		3.88236	1.7587			0.105635	0.165755		1.25425	1.10226		0.242236	0.305631		0.0638735	0.0403879			0.0613379	0.0377043		0.175652	0.247379		0.0573099	0.016442		0.0554448	0.0258206
440 ms	3.01904	2.44208		5.38003	1.04023		5.14388	1.18048		3.90003	1.76207			0.105399	0.164205		1.26459	1.10673		0.248797	0.313144		0.0637345	0.0406738			0.0613266	0.0369206		0.178347	0.250758		0.0576056	0.0165543		0.055552	0.0255539
441 ms	3.06093	2.46116		5.37992	1.03866		5.14405	1.17772		3.9176	1.76263			0.104064	0.162754		1.27509	1.11128		0.254998	0.321464		0.0639009	0.041138			0.0614051	0.0362455		0.180969	0.254805		0.0579478	0.0162968		0.0548414	0.0252518
442 ms	3.09835	2.47841		5.3794	1.03712		5.14357	1.17531		3.93261	1.76307			0.103488	0.161279		1.28565	1.116		0.261394	0.329568		0.0640168	0.0410573			0.0611276	0.0357854		0.183654	0.258806		0.0581129	0.0172686		0.0548925	0.0245964
443 ms	3.13396	2.49218		5.37841	1.03553		5.14285	1.17263		3.94759	1.76182			0.102807	0.159567		1.29669	1.12021		0.268417	0.337637		0.0645098	0.041119			0.0611079	0.0353159		0.186203	0.264196		0.0591561	0.0171648		0.0547267	0.0238629
444 ms	3.16689	2.50578		5.37763	1.0341		5.14221	1.17038		3.96104	1.76139			0.102415	0.158056		1.30751	1.12479		0.275395	0.346069		0.0648918	0.0413848			0.0609654	0.0343075		0.188752	0.269477		0.0595583	0.0172524		0.0544252	0.0233125
445 ms	3.19994	2.51699		5.37654	1.03258		5.14162	1.16763		3.97568	1.75942			0.101272	0.156553		1.31822	1.12961		0.282454	0.354249		0.0648574	0.0415535			0.060909	0.0338532		0.191853	0.275688		0.0603217	0.0170028		0.0544206	0.0230913
446 ms	3.22949	2.5307		5.3753	1.03184		5.14032	1.16616		3.9874	1.76021			0.101321	0.155002		1.32953	1.134		0.289954	0.362535		0.0653165	0.0415871			0.0604609	0.0327861		0.195127	0.282623		0.0606047	0.0172141		0.0545083	0.0227886
447 ms	3.26067	2.54203		5.37443	1.03024		5.13995	1.16324		4.00182	1.75869			0.100546	0.15299		1.3411	1.13802		0.297015	0.371281		0.0659533	0.0420033			0.0603249	0.0317991		0.198385	0.290138		0.0613326	0.0177048		0.0548119	0.0223394
448 ms	3.29099	2.55473		5.37363	1.02908		5.13933	1.16097		4.01478	1.75915			0.100534	0.151075		1.35253	1.1419		0.304732	0.379879		0.0665148	0.0418941			0.0601937	0.0317749		0.20166	0.297465		0.0620444	0.0183821		0.0552135	0.0219773
449 ms	3.32192	2.56593		5.37296	1.02792		5.13912	1.15844		4.02884	1.75902			0.100682	0.149302		1.36379	1.14603		0.312635	0.389107		0.0667097	0.0421233			0.0607037	0.0309716		0.20524	0.30525		0.0624455	0.0181072		0.0550923	0.0222235
450 ms	3.35075	2.57793		5.37261	1.0268		5.13893	1.15623		4.0416	1.75996			0.100945	0.147778		1.37551	1.15008		0.3205	0.398654		0.066775	0.0424666			0.0602436	0.0306218		0.208218	0.313266		0.0627742	0.0182515		0.055219	0.0219864
451 ms	3.37939	2.58807		5.37242	1.02563		5.13926	1.15365		4.05496	1.75991			0.100589	0.146225		1.38766	1.15385		0.328534	0.408061		0.0667088	0.0430895			0.0602846	0.0307894		0.210802	0.320232		0.0625875	0.0180535		0.0555082	0.0216056
452 ms	3.40581	2.59756		5.37244	1.02455		5.13961	1.15125		4.06669	1.76023			0.100619	0.144736		1.39993	1.15753		0.336803	0.417444		0.0668552	0.0432458			0.0597505	0.0302206		0.214538	0.326964		0.0624521	0.0196081		0.0557241	0.0210049
453 ms	3.43099	2.60512		5.37252	1.02336		5.14035	1.14861		4.07854	1.75927			0.0994686	0.142955		1.41225	1.16142		0.345228	0.427366		0.0669768	0.0435277			0.0594415	0.0295499		0.217686	0.334138		0.0624381	0.018866		0.0553167	0.0207713
454 ms	3.45363	2.61214		5.37256	1.02231		5.14091	1.14624		4.0887	1.75861			0.100293	0.141777		1.42443	1.16556		0.354225	0.437236		0.0671633	0.0433478			0.0587925	0.029635		0.220778	0.34106		0.0618167	0.0196687		0.0554652	0.0202906
455 ms	3.47468	2.61685		5.37238	1.02133		5.14145	1.14385		4.09869	1.7565			0.100143	0.140304		1.43673	1.17003		0.363148	0.447286		0.0672932	0.0435184			0.0585347	0.0289868		0.224613	0.347596		0.0615425	0.0204088		0.0551081	0.0194331
456 ms	3.49281	2.62108		5.37197	1.02041		5.14157	1.14171		4.10678	1.75448			0.0997045	0.139388		1.44953	1.17399		0.372239	0.457234		0.0680015	0.0438662			0.0576012	0.0283443		0.228263	0.355086		0.0617853	0.020717		0.0552711	0.0184195
457 ms	3.51003	2.62321		5.37109	1.01957		5.14144	1.1393		4.11482	1.75113			0.0986232	0.137899		1.4621	1.17837		0.381494	0.46749		0.0685574	0.043887			0.0572707	0.0282261		0.233012	0.362338		0.0624202	0.0209656		0.0550028	0.0185625
458 ms	3.52459	2.62488		5.36958	1.01884		5.14066	1.13705		4.12117	1.7478			0.0985745	0.136315		1.47505	1.18249		0.391079	0.478091		0.0690144	0.0437437			0.0573507	0.0276414		0.237858	0.369977		0.062933	0.0216942		0.0550963	0.0182156
459 ms	3.5376	2.62504		5.36757	1.018		5.13941	1.13463		4.12732	1.74342			0.0987748	0.1349		1.48818	1.18674		0.40087	0.489287		0.0696644	0.0441144			0.0571532	0.0264955		0.242266	0.377487		0.063262	0.0211476		0.0552325	0.0178343
460 ms	3.54853	2.62431		5.36483	1.01725		5.13743	1.13225		4.13195	1.73887			0.0991783	0.134031		1.50179	1.19064		0.410747	0.500636		0.0699797	0.0440478			0.0574259	0.0259738		0.246441	0.385119		0.0636654	0.0217338		0.0554472	0.0176451
461 ms	3.55793	2.62218		5.36143	1.01643		5.13483	1.12958		4.13622	1.73331			0.0985318	0.132292		1.51527	1.19474		0.420995	0.511742		0.070407	0.0445707			0.0579377	0.0255401		0.251105	0.392571		0.0639778	0.0214354		0.0561705	0.0172535
462 ms	3.56519	2.6193		5.35725	1.01546		5.13139	1.12691		4.13906	1.72748			0.0979738	0.130814		1.52888	1.19889		0.431381	0.523099		0.0707081	0.0446303			0.0581719	0.0251422		0.255548	0.400364		0.0647042	0.0215742		0.0567001	0.0170504
463 ms	3.57102	2.61524		5.35226	1.01442		5.12741	1.12388		4.14145	1.72069			0.0980463	0.129717		1.54316	1.20283		0.442175	0.534682		0.0708748	0.0447079			0.0593775	0.0244908		0.260128	0.407518		0.0649967	0.0216126		0.0568363	0.0172421
464 ms	3.57487	2.61045		5.34652	1.01318		5.12253	1.12087		4.14239	1.71351			0.0985049	0.12807		1.55687	1.20709		0.453139	0.546152		0.0710796	0.0451129			0.0591224	0.0240265		0.264974	0.414976		0.0641536	0.0214266		0.0573337	0.0169047
465 ms	3.5777	2.60413		5.34009	1.01186		5.11694	1.11761		4.14277	1.70528			0.098636	0.126861		1.57125	1.21107		0.464349	0.557414		0.0712858	0.044818			0.0595802	0.0231262		0.26967	0.421949		0.0648139	0.0214672		0.0578307	0.0162724
466 ms	3.57868	2.59728		5.33277	1.01042		5.11058	1.11418		4.14179	1.69664			0.098151	0.125274		1.58577	1.21499		0.475352	0.568894		0.0716898	0.044742			0.0594139	0.0227536		0.274231	0.429547		0.0651665	0.0211077		0.056979	0.0165745
467 ms	3.57852	2.58903		5.32468	1.00875		5.10341	1.11052		4.14005	1.68698			0.0975532	0.123127		1.59971	1.21949		0.486994	0.580582		0.0725863	0.0447704			0.0593762	0.0230211		0.279215	0.436449		0.0657784	0.0208469		0.057341	0.0161078
468 ms	3.57693	2.57959		5.31563	1.00698		5.09551	1.10681		4.137	1.67662			0.096806	0.122191		1.61418	1.22365		0.498799	0.592372		0.0732202	0.0446044			0.0590408	0.0227278		0.284306	0.443189		0.0663895	0.0209202		0.0573211	0.0156013
469 ms	3.57378	2.56899		5.30574	1.00514		5.08688	1.10287		4.13299	1.66531			0.0968125	0.120924		1.62884	1.22774		0.511071	0.60409		0.073696	0.0453946			0.0586913	0.0233109		0.289339	0.449697		0.0665168	0.020945		0.0571206	0.0156718
470 ms	3.56908	2.55688		5.29503	1.00314		5.07748	1.09883		4.12758	1.65307			0.0955446	0.119243		1.6433	1.2321		0.523184	0.615912		0.0739204	0.0455573			0.0578841	0.0229392		0.294515	0.455998		0.0668897	0.0215751		0.056537	0.0154913
471 ms	3.56287	2.54327		5.28345	1.00099		5.06731	1.09456		4.12106	1.63962			0.0945965	0.117884		1.65892	1.23588		0.535835	0.627929		0.0745748	0.0456078			0.0571296	0.0222541		0.299177	0.461337		0.0675063	0.0223271		0.0562175	0.0154541
472 ms	3.55403	2.52857		5.27099	0.998669		5.05645	1.0902		4.11297	1.62519			0.0935698	0.116349		1.67409	1.24011		0.548559	0.640048		0.0754781	0.0461436			0.0565464	0.0228044		0.305035	0.467146		0.0668656	0.0224712		0.0561101	0.0162189
473 ms	3.54339	2.5116		5.25771	0.996249		5.0448	1.08567		4.10362	1.60932			0.0931484	0.115529		1.68919	1.24458		0.562042	0.652251		0.0761324	0.0466151			0.0558897	0.0225805		0.310991	0.471699		0.0676248	0.0229524		0.0565635	0.0167381
474 ms	3.53013	2.49308		5.2436	0.993672		5.03246	1.081		4.09271	1.59236			0.0926099	0.115124		1.70477	1.24886		0.575483	0.66456		0.0761107	0.0470472			0.0557576	0.0221822		0.317108	0.476493		0.067409	0.0234357		0.0560764	0.0169988
475 ms	3.51431	2.47304		5.2288	0.990992		5.01941	1.07605		4.08047	1.57413			0.092776	0.114199		1.72032	1.25327		0.589299	0.676887		0.0767063	0.0474942			0.0554354	0.0210516		0.322658	0.481701		0.067994	0.0234153		0.0554977	0.0168122
476 ms	3.49622	2.45121		5.21312	0.988213		5.0056	1.07092		4.06672	1.55472			0.0920433	0.11321		1.73598	1.25776		0.603088	0.689336		0.0774107	0.0476683			0.0556973	0.0213248		0.328624	0.486857		0.06869	0.0239163		0.0558878	0.0175702
477 ms	3.47607	2.4275		5.19674	0.985279		4.99114	1.06563		4.05168	1.53409			0.0921204	0.112086		1.75189	1.26222		0.617596	0.701755		0.0785057	0.0479518			0.0557967	0.020829		0.334305	0.491561		0.0691623	0.0244289		0.0561733	0.0172314
478 ms	3.45318	2.40248		5.1796	0.98225		4.97603	1.06018		4.03525	1.51254			0.0918055	0.111172		1.76721	1.267		0.632665	0.714312		0.0792805	0.0487513			0.056456	0.0209274		0.340753	0.496325		0.0696677	0.0243714		0.0566363	0.0183015
479 ms	3.42874	2.37541		5.16183	0.979078		4.96031	1.05454		4.01769	1.48989			0.0917409	0.110399		1.78281	1.2721		0.648056	0.726847		0.0801928	0.0497454			0.0561399	0.0209686		0.346575	0.501358		0.0704528	0.0243435		0.0560649	0.0179815
480 ms	3.40214	2.34739		5.14334	0.975801		4.94415	1.04868		3.99891	1.4665			0.0914634	0.109607		1.79935	1.27643		0.663673	0.739597		0.0810051	0.0503236			0.057022	0.0197726		0.352367	0.506196		0.0699526	0.0248122		0.0560564	0.017181
481 ms	3.3739	2.31815		5.12436	0.972386		4.92758	1.04263		3.97905	1.4423			0.0912309	0.108261		1.81573	1.28082		0.679392	0.751947		0.0826922	0.0512895			0.0561546	0.0191911		0.35841	0.51141		0.0701985	0.0252104		0.0560216	0.0168452
482 ms	3.3442	2.28736		5.10482	0.968856		4.91057	1.03649		3.9582	1.41737			0.0904758	0.106969		1.83255	1.28562		0.695464	0.764569		0.0837575	0.0525955			0.0560935	0.0197544		0.364835	0.515851		0.070135	0.0257509		0.0557593	0.0169794
483 ms	3.31305	2.25555		5.08512	0.96508		4.89339	1.03019		3.93641	1.39185			0.09057	0.106185		1.84947	1.29043		0.712282	0.777104		0.0851054	0.0542956			0.0560402	0.0189772		0.371989	0.520566		0.07008	0.0262609		0.0557852	0.0161167
484 ms	3.28025	2.2229		5.065	0.961285		4.87594	1.0238		3.91377	1.36593			0.0902722	0.105366		1.86645	1.29547		0.729096	0.78966		0.0864343	0.0560678			0.0558546	0.0195773		0.37878	0.525697		0.0708062	0.0265125		0.0552732	0.0163764
485 ms	3.24655	2.18912		5.04466	0.95744		4.85849	1.01725		3.89039	1.33956			0.0904951	0.104307		1.88388	1.30069		0.746284	0.802526		0.0879305	0.0580561			0.0568525	0.0192673		0.385715	0.530928		0.0716066	0.0266365		0.0552396	0.0156734
486 ms	3.21154	2.15508		5.02425	0.953497		4.84104	1.01064		3.86627	1.31305			0.0897346	0.10342		1.90151	1.30575		0.763446	0.815722		0.0894893	0.0600778			0.0568299	0.0192322		0.392898	0.536155		0.0724297	0.0273022		0.0557535	0.0156899
487 ms	3.17589	2.12002		5.00395	0.949426		4.82358	1.00399		3.84164	1.28629			0.0898084	0.102193		1.91861	1.31161		0.781011	0.828723		0.0914014	0.0627162			0.0570922	0.0200169		0.400959	0.542198		0.0739719	0.0272899		0.056012	0.0158934
488 ms	3.13929	2.08462		4.98369	0.945247		4.80618	0.997278		3.81651	1.25953			0.0889985	0.101709		1.93634	1.31769		0.799141	0.842021		0.093157	0.0653301			0.0571448	0.0201677		0.4091	0.547675		0.0745614	0.027318		0.0563335	0.0158947
489 ms	3.10207	2.04866		4.9637	0.940816		4.78892	0.990488		3.79103	1.23282			0.0896643	0.100932		1.95392	1.32343		0.81732	0.855324		0.0953786	0.0683592			0.0574278	0.0208381		0.417335	0.55386		0.075564	0.0270141		0.0566483	0.0156946
490 ms	3.06424	2.0127		4.94381	0.936248		4.77171	0.983656		3.7653	1.20639			0.0891631	0.0999612		1.97152	1.32935		0.835623	0.868842		0.097425	0.0719311			0.057127	0.0206834		0.42537	0.559974		0.0756788	0.0275764		0.0565754	0.0161274
491 ms	3.02572	1.97723		4.92424	0.931444		4.75463	0.976709		3.73939	1.18042			0.0894257	0.0993879		1.98966	1.3352		0.854481	0.88276		0.0998873	0.0752511			0.0573376	0.0207415		0.434241	0.566412		0.0749291	0.0282004		0.0572009	0.0160545
492 ms	2.98655	1.94251		4.90496	0.926368		4.73763	0.969698		3.71337	1.15509			0.0883718	0.0984327		2.00787	1.3409		0.873419	0.89652		0.102445	0.0791004			0.056596	0.0217335		0.44305	0.573239		0.0753302	0.0291607		0.0575179	0.0165976
493 ms	2.94737	1.90811		4.88592	0.921093		4.72071	0.962618		3.68742	1.13034			0.0884803	0.0976254		2.02601	1.34668		0.893053	0.910172		0.105239	0.0833699			0.0558949	0.0219761		0.452404	0.579818		0.0752742	0.0302804		0.0571361	0.0171876
494 ms	2.90798	1.87449		4.86713	0.915653		4.70384	0.95545		3.66158	1.10648			0.0878785	0.0966524		2.04444	1.35282		0.912988	0.923861		0.107854	0.0883574			0.0552923	0.0225271		0.46132	0.587088		0.0756909	0.031355		0.0573573	0.0173515
495 ms	2.86859	1.84177		4.84847	0.910056		4.68706	0.948308		3.63599	1.0835			0.0885663	0.0957472		2.06289	1.35866		0.932897	0.937737		0.110705	0.0937936			0.0557991	0.0220785		0.470428	0.594291		0.0772609	0.0329547		0.0573024	0.0172537
496 ms	2.82891	1.81064		4.83007	0.904345		4.67033	0.941066		3.61062	1.06169			0.0872865	0.0948225		2.08152	1.36487		0.953429	0.952185		0.113155	0.0992316			0.0558281	0.0222854		0.479745	0.601837		0.0774714	0.0351948		0.0576688	0.0178828
497 ms	2.78941	1.78045		4.81178	0.898582		4.65362	0.933813		3.58556	1.04095			0.0871685	0.0937638		2.10009	1.37146		0.974317	0.96639		0.116604	0.105156			0.0563198	0.0220531		0.489002	0.609756		0.0787844	0.0365581		0.0577673	0.0179487
498 ms	2.75052	1.75082		4.79364	0.892741		4.63704	0.92651		3.56094	1.02124			0.0863723	0.0922184		2.11836	1.37831		0.995172	0.980504		0.119652	0.11192			0.0557848	0.0215799		0.498501	0.617933		0.0801412	0.0393047		0.0579046	0.0182157
499 ms	2.71245	1.72174		4.77571	0.886882		4.62055	0.919201		3.53681	1.00257			0.0870597	0.0917459		2.13707	1.38486		1.01667	0.994664		0.1231	0.118531			0.0558034	0.0210373		0.508482	0.626059		0.0813337	0.0415213		0.0571313	0.0174574
500 ms	2.67486	1.69388		4.75789	0.880946		4.60416	0.911882		3.5131	0.985122			0.0868812	0.0910019		2.15587	1.39183		1.03837	1.00887		0.126615	0.125556			0.0561106	0.0205824		0.517911	0.635054		0.0830982	0.0439211		0.057498	0.0173793
501 ms	2.63795	1.66763		4.7402	0.87497		4.58787	0.904624		3.48987	0.96886			0.0875292	0.0908733		2.17461	1.39809		1.06016	1.0229		0.131199	0.132718			0.0560502	0.0210059		0.527797	0.643856		0.0846976	0.048233		0.0574432	0.0171666
502 ms	2.60196	1.64283		4.72271	0.869056		4.57174	0.897336		3.46713	0.953797			0.0874964	0.0903067		2.19327	1.40475		1.08245	1.03688		0.135483	0.140362			0.0557715	0.0216666		0.537772	0.653227		0.0849851	0.0523883		0.0580992	0.0174534
503 ms	2.56748	1.61889		4.70536	0.863207		4.55577	0.89012		3.44496	0.939709			0.08785	0.0896534		2.21177	1.41139		1.10502	1.05081		0.140124	0.148499			0.0555986	0.0216935		0.548365	0.662445		0.0868455	0.0569302		0.0580139	0.0176892
504 ms	2.53423	1.59643		4.68809	0.857451		4.54001	0.882938		3.42337	0.926693			0.0884368	0.08922		2.23078	1.41768		1.12799	1.06526		0.144736	0.157092			0.0542683	0.0220851		0.558913	0.672192		0.0880984	0.0615042		0.0580584	0.0171136
505 ms	2.50208	1.5756		4.67088	0.85186		4.52436	0.875855		3.40234	0.914823			0.0892044	0.0887801		2.24956	1.42373		1.15104	1.07968		0.150043	0.165798			0.0543456	0.0224094		0.569245	0.681704		0.090061	0.0657952		0.0578132	0.0173031
506 ms	2.47073	1.55673		4.65377	0.846379		4.50897	0.868775		3.38184	0.90411			0.0892685	0.0885133		2.2683	1.4299		1.17386	1.09418		0.155355	0.174912			0.0541367	0.0229701		0.57942	0.691765		0.0907479	0.070983		0.058256	0.0178556
507 ms	2.44028	1.53958		4.63689	0.840974		4.4936	0.861803		3.36185	0.894472			0.0892081	0.0880798		2.28649	1.43618		1.19713	1.10892		0.160861	0.184487			0.0547658	0.0229554		0.590227	0.701959		0.0917195	0.0763209		0.0584585	0.0177139
508 ms	2.41102	1.52339		4.62007	0.835718		4.47851	0.854969		3.34245	0.885783			0.0882591	0.0868035		2.30453	1.44311		1.22103	1.12375		0.166071	0.194196			0.0550952	0.0230827		0.600992	0.712582		0.0927725	0.0821069		0.0590478	0.0178094
509 ms	2.38308	1.50813		4.60325	0.830661		4.46345	0.848213		3.32361	0.877916			0.0885378	0.0858121		2.32288	1.44941		1.24494	1.13862		0.171934	0.204545			0.0557396	0.0232538		0.61186	0.722978		0.0950821	0.0881125		0.0590599	0.0176959
510 ms	2.35574	1.49465		4.58639	0.825819		4.44852	0.841644		3.30522	0.871117			0.0884869	0.0852289		2.34133	1.45568		1.26913	1.15357		0.178507	0.215175			0.0550262	0.0237352		0.622787	0.734175		0.0962362	0.0944134		0.0589587	0.0178109
511 ms	2.32965	1.48185		4.5697	0.821201		4.43365	0.83525		3.28733	0.865107			0.0876868	0.0848009		2.35982	1.4617		1.29322	1.1683		0.184725	0.225749			0.0562573	0.023886		0.633349	0.744945		0.098438	0.102152		0.0594885	0.0185937
512 ms	2.30461	1.47051		4.55312	0.816744		4.41893	0.829105		3.26983	0.859839			0.0875602	0.0845261		2.37823	1.46772		1.31812	1.18263		0.191359	0.237135			0.0568734	0.0242803		0.644223	0.75577		0.0998761	0.110115		0.0599851	0.0182254
513 ms	2.2808	1.46008		4.53649	0.812551		4.40419	0.8231		3.25271	0.85526			0.0873707	0.0836128		2.39625	1.47415		1.34353	1.19745		0.198418	0.24878			0.0571493	0.024581		0.655418	0.766825		0.102238	0.118054		0.0602639	0.018818
514 ms	2.2581	1.45069		4.51985	0.808589		4.38961	0.817393		3.23603	0.851427			0.087133	0.0826473		2.41462	1.48014		1.36869	1.21202		0.205669	0.260485			0.0571583	0.0252244		0.66595	0.777107		0.104266	0.126745		0.060391	0.0189409
515 ms	2.23646	1.44234		4.50315	0.804935		4.3749	0.81188		3.21964	0.8482			0.087647	0.0825669		2.43346	1.48558		1.39396	1.22645		0.213063	0.272604			0.0571123	0.0261961		0.676737	0.787052		0.106068	0.13524		0.0595332	0.019094
516 ms	2.21596	1.43461		4.48657	0.801378		4.3603	0.806702		3.20355	0.845594			0.087644	0.0822804		2.45164	1.49149		1.42007	1.24115		0.220993	0.285101			0.0565717	0.0273682		0.687429	0.797533		0.108018	0.145782		0.0591603	0.018935
517 ms	2.19665	1.42738		4.47004	0.798035		4.34559	0.801873		3.18767	0.843351			0.0879492	0.0820132		2.46988	1.49697		1.44612	1.25575		0.228892	0.297456			0.0571853	0.0270389		0.697853	0.807581		0.110463	0.156283		0.0587553	0.019084
518 ms	2.17805	1.42102		4.4535	0.794765		4.33091	0.797282		3.17206	0.841671			0.0877618	0.0820884		2.48777	1.50297		1.4726	1.27018		0.237691	0.310605			0.0576385	0.0279204		0.709274	0.81672		0.112688	0.166404		0.0589968	0.0184747
519 ms	2.16035	1.41482		4.43691	0.791585		4.31615	0.793039		3.15667	0.840403			0.0879057	0.0815463		2.50608	1.50837		1.49891	1.28482		0.246568	0.323573			0.0577116	0.0274452		0.720392	0.826356		0.115367	0.177122		0.0588597	0.0183666
520 ms	2.14367	1.40911		4.42044	0.788609		4.30138	0.789175		3.14155	0.839559			0.0876581	0.0811939		2.52424	1.51382		1.52517	1.29894		0.255557	0.336978			0.0570661	0.028077		0.730939	0.834687		0.118019	0.188524		0.0586174	0.0179125
521 ms	2.12782	1.40367		4.40383	0.785818		4.28658	0.785663		3.1266	0.838955			0.0879424	0.0813774		2.5424	1.51868		1.55242	1.31333		0.265079	0.351343			0.0576355	0.0288341		0.742163	0.84345		0.120908	0.199796		0.0593177	0.0183039
522 ms	2.11251	1.39896		4.38727	0.783113		4.27184	0.782514		3.1118	0.838802			0.0876376	0.0809845		2.56029	1.52364		1.57967	1.32785		0.27515	0.365757			0.0577893	0.0293288		0.75279	0.852114		0.123817	0.211377		0.0597856	0.0183099
523 ms	2.09753	1.39523		4.37069	0.780668		4.25704	0.779759		3.09705	0.83883			0.0864878	0.080681		2.57854	1.52859		1.60669	1.34231		0.285119	0.380319			0.0585767	0.0287762		0.763877	0.859729		0.126893	0.221756		0.0603383	0.0190956
524 ms	2.08304	1.39233		4.35407	0.778355		4.24228	0.777268		3.08249	0.839384			0.0866555	0.0804698		2.59637	1.53368		1.63409	1.35653		0.295962	0.395347			0.0588377	0.0292442		0.775042	0.866558		0.129713	0.232512		0.0613061	0.0192763
525 ms	2.06868	1.39022		4.33735	0.776323		4.22754	0.775325		3.06793	0.840266			0.0878984	0.0791477		2.61405	1.53865		1.66173	1.37087		0.307233	0.410233			0.0583995	0.0291854		0.785798	0.874212		0.13207	0.242991		0.0610894	0.0194056
526 ms	2.05453	1.38875		4.32061	0.774599		4.21277	0.773718		3.05349	0.841522			0.087583	0.0791692		2.63132	1.5438		1.68948	1.38525		0.318648	0.425963			0.0578421	0.0294758		0.797071	0.881007		0.135062	0.25362		0.0616115	0.0195062
527 ms	2.0406	1.38799		4.30374	0.773092		4.19802	0.77261		3.03906	0.843084			0.0877313	0.0785791		2.64865	1.54895		1.71757	1.39967		0.330467	0.441891			0.0589122	0.0294937		0.808527	0.888247		0.137618	0.263717		0.0624746	0.0197356
528 ms	2.0268	1.3878		4.28687	0.771866		4.18322	0.771782		3.02476	0.84511			0.0877668	0.0781821		2.66606	1.55448		1.7456	1.41394		0.342816	0.457841			0.058548	0.030163		0.820229	0.895681		0.14062	0.274066		0.0622686	0.0196835
529 ms	2.01289	1.38801		4.26984	0.770901		4.16836	0.771367		3.01046	0.84747			0.0875461	0.0778883		2.68336	1.55936		1.77368	1.42809		0.35524	0.474745			0.0582123	0.0307423		0.832453	0.902477		0.144286	0.28397		0.0628857	0.0202216
530 ms	1.99905	1.3883		4.25273	0.770143		4.15345	0.771281		2.99628	0.850347			0.0883658	0.0775814		2.70018	1.56447		1.80201	1.4419		0.36846	0.491696			0.0580076	0.0318874		0.84467	0.909808		0.14808	0.294283		0.0626548	0.0199558
531 ms	1.98545	1.38877		4.23551	0.769695		4.13857	0.771616		2.98214	0.853438			0.0881237	0.0769376		2.71727	1.56908		1.83017	1.45551		0.382028	0.509326			0.0575859	0.0332312		0.85683	0.917468		0.15138	0.304471		0.0628845	0.0199634
532 ms	1.97207	1.38979		4.2182	0.769509		4.12362	0.772327		2.96806	0.856835			0.0876594	0.0768972		2.73461	1.57361		1.85865	1.4691		0.395175	0.527303			0.0571885	0.0339501		0.86887	0.925491		0.154607	0.314847		0.0630936	0.0206225
533 ms	1.95865	1.39072		4.20074	0.769467		4.10859	0.773298		2.95399	0.860469			0.0876728	0.0760087		2.75193	1.57854		1.88766	1.4826		0.409229	0.545647			0.0581713	0.0347591		0.881332	0.933741		0.158131	0.325113		0.063334	0.0209103
534 ms	1.94529	1.39192		4.18323	0.769658		4.09345	0.774523		2.94002	0.864452			0.0873752	0.0751548		2.76893	1.5831		1.91676	1.49605		0.423784	0.564145			0.0578918	0.0353865		0.894323	0.942273		0.162235	0.335331		0.0633409	0.0213465
535 ms	1.93199	1.39312		4.16555	0.77005		4.07827	0.77605		2.92593	0.868534			0.086983	0.0745311		2.78581	1.58762		1.94564	1.50897		0.438444	0.582951			0.0581749	0.0352508		0.906978	0.950531		0.166182	0.345198		0.063579	0.021583
536 ms	1.91899	1.39439		4.14784	0.770719		4.06305	0.777871		2.91193	0.872695			0.0874028	0.0743457		2.80302	1.59228		1.97524	1.52209		0.45371	0.6015			0.0589117	0.0359203		0.91971	0.959324		0.169765	0.355342		0.0633466	0.0217462
537 ms	1.90589	1.39559		4.12985	0.771539		4.04778	0.779978		2.89794	0.877004			0.0868512	0.0740817		2.82031	1.59678		2.00489	1.53501		0.469364	0.620809			0.0593016	0.0348972		0.932665	0.968042		0.172922	0.364576		0.0639574	0.0221133
538 ms	1.89266	1.39692		4.11175	0.772314		4.0323	0.782259		2.88393	0.881449			0.0863587	0.0739517		2.83728	1.60139		2.03516	1.54799		0.484838	0.640025			0.0597906	0.0351916		0.945636	0.976917		0.177006	0.373681		0.0644452	0.0223508
539 ms	1.87932	1.39782		4.0935	0.773316		4.0168	0.784706		2.86998	0.885916			0.0857609	0.0730076		2.85403	1.60586		2.06528	1.56046		0.501211	0.659332			0.0597597	0.0359607		0.959423	0.985649		0.181443	0.38281		0.0638869	0.0222959
540 ms	1.86587	1.3989		4.0752	0.77448		4.00118	0.787417		2.85601	0.890425			0.0850521	0.0728183		2.87083	1.6096		2.09528	1.57326		0.517479	0.678431			0.0593295	0.0363106		0.972618	0.99491		0.185216	0.391336		0.0641866	0.0226613
541 ms	1.85214	1.39987		4.0567	0.775717		3.98548	0.790326		2.84202	0.894978			0.0849302	0.0724832		2.88769	1.61359		2.12554	1.58586		0.534577	0.697661			0.0603807	0.0366368		0.985859	1.0035		0.189788	0.399739		0.0644259	0.0218655
542 ms	1.83834	1.40091		4.03813	0.777051		3.96969	0.793481		2.82807	0.899486			0.0850277	0.0724078		2.90458	1.61729		2.15595	1.59867		0.551527	0.716765			0.0605904	0.0369745		0.998595	1.01197		0.193742	0.408291		0.0648526	0.0216889
543 ms	1.82439	1.40191		4.01932	0.778323		3.95373	0.796799		2.81412	0.904127			0.0840646	0.0722984		2.92129	1.62089		2.1863	1.6109		0.569013	0.736242			0.0605281	0.0365337		1.01167	1.0207		0.197568	0.416893		0.0650747	0.0218307
544 ms	1.81058	1.4032		4.0005	0.779743		3.93774	0.800353		2.80015	0.908773			0.0841934	0.0717481		2.93809	1.6239		2.21682	1.62295		0.587144	0.755197			0.0602053	0.0370978		1.02471	1.02931		0.201157	0.42515		0.0649131	0.0223622
545 ms	1.79654	1.40449		3.98159	0.781306		3.9217	0.803996		2.78628	0.913448			0.0840565	0.0710631		2.95477	1.62724		2.24705	1.635		0.60529	0.774254			0.0603537	0.0373188		1.03798	1.0377		0.20503	0.433265		0.0645358	0.0230587
546 ms	1.78255	1.40595		3.96251	0.782982		3.90543	0.80775		2.77242	0.918147			0.084122	0.071999		2.97142	1.63019		2.27723	1.64717		0.623675	0.793681			0.0606147	0.0364334		1.05069	1.04564		0.209437	0.440899		0.0650732	0.0230893
547 ms	1.76884	1.40747		3.94328	0.784802		3.88909	0.811704		2.75859	0.922885			0.0849791	0.071857		2.98776	1.63327		2.30769	1.65847		0.642591	0.813206			0.0615797	0.0357921		1.06351	1.05327		0.21419	0.44892		0.0653987	0.0235176
548 ms	1.7551	1.40876		3.92394	0.786572		3.87266	0.815839		2.74476	0.927567			0.0849362	0.0721242		3.00411	1.63612		2.33774	1.66978		0.661412	0.832756			0.061084	0.0352153		1.07608	1.0615		0.217623	0.457684		0.0653547	0.0238585
549 ms	1.74164	1.40988		3.90449	0.788461		3.85618	0.820089		2.731	0.932358			0.0847019	0.0717849		3.02028	1.63853		2.36801	1.68064		0.68113	0.852112			0.0607972	0.0349753		1.08943	1.06959		0.222064	0.467131		0.0655095	0.0244103
550 ms	1.72823	1.41084		3.88498	0.790621		3.8397	0.824528		2.7173	0.937124			0.0855231	0.0705695		3.03626	1.64141		2.3981	1.69148		0.701027	0.87141			0.0608893	0.0355148		1.10206	1.07671		0.226768	0.476237		0.0658179	0.0248562
551 ms	1.71506	1.41158		3.86548	0.792919		3.82308	0.82897		2.70375	0.941925			0.0855038	0.0708392		3.0517	1.6445		2.42792	1.70237		0.720636	0.891319			0.0604416	0.0355519		1.11463	1.08351		0.231845	0.485487		0.0664731	0.0247616
552 ms	1.70223	1.41222		3.84584	0.795319		3.80644	0.833723		2.69024	0.946669			0.0858043	0.0710552		3.06722	1.647		2.45757	1.71282		0.741059	0.911231			0.060646	0.0349659		1.12757	1.0911		0.236765	0.494768		0.0673013	0.0242988
553 ms	1.68967	1.41302		3.8263	0.797766		3.78973	0.838543		2.67683	0.951523			0.0851582	0.0711515		3.0828	1.64945		2.4876	1.72273		0.762163	0.930611			0.0608314	0.0355429		1.14048	1.09776		0.24158	0.504704		0.0678209	0.0251317
554 ms	1.67715	1.41366		3.80674	0.800331		3.77313	0.843452		2.66354	0.956266			0.0848469	0.0711283		3.09823	1.65176		2.51713	1.73278		0.783116	0.9504			0.0597892	0.0353316		1.15352	1.10466		0.24638	0.516107		0.0678678	0.0249373
555 ms	1.66495	1.4143		3.78725	0.803299		3.75642	0.848403		2.65046	0.961032			0.0855026	0.0719699		3.11364	1.65415		2.54688	1.74248		0.804709	0.970178			0.0594846	0.0346818		1.16666	1.11101		0.25244	0.529112		0.0679426	0.0256194
556 ms	1.65283	1.41523		3.76777	0.806359		3.73975	0.853547		2.63748	0.965716			0.0856428	0.0712435		3.12878	1.65656		2.57638	1.75193		0.826833	0.989864			0.0587355	0.0343032		1.17935	1.11738		0.258436	0.543415		0.0675219	0.0253471
557 ms	1.64072	1.41612		3.74842	0.809429		3.72302	0.858586		2.62467	0.97039			0.0850548	0.07142		3.14346	1.65897		2.60567	1.76142		0.849052	1.00963			0.0582001	0.0343429		1.19195	1.12319		0.264948	0.558603		0.0679011	0.0253571
558 ms	1.62838	1.4168		3.72905	0.812655		3.70642	0.863944		2.61193	0.975009			0.0846796	0.0707361		3.15842	1.66128		2.63528	1.77038		0.871717	1.02899			0.0588757	0.0344332		1.20469	1.12958		0.271163	0.575144		0.0681992	0.0257616
559 ms	1.61608	1.41729		3.70982	0.816116		3.68978	0.869285		2.5993	0.979628			0.0847032	0.0705305		3.17309	1.66385		2.66447	1.77907		0.895083	1.04802			0.0581684	0.0342298		1.21696	1.13489		0.278003	0.590916		0.0674198	0.0261325
560 ms	1.60397	1.41787		3.69067	0.819785		3.67334	0.874803		2.58677	0.984178			0.0853934	0.0698614		3.18751	1.66651		2.69356	1.78756		0.918527	1.06725			0.0586476	0.033489		1.22947	1.14073		0.28468	0.605709		0.067902	0.0258122
561 ms	1.59198	1.41887		3.67162	0.823685		3.65691	0.880398		2.57438	0.988776			0.0854709	0.0690605		3.20198	1.66918		2.72266	1.79568		0.942553	1.08589			0.0594361	0.0334122		1.2419	1.14564		0.291304	0.617919		0.0679308	0.0265426
562 ms	1.58016	1.4203		3.65266	0.827549		3.64061	0.886205		2.56207	0.993415			0.08518	0.0683138		3.21624	1.67155		2.75138	1.80347		0.96634	1.10442			0.0595126	0.0336249		1.25416	1.15067		0.29711	0.625586		0.0685907	0.0262388
563 ms	1.56855	1.42187		3.63384	0.831612		3.62435	0.892077		2.54992	0.998053			0.0854733	0.0689666		3.23043	1.67398		2.78006	1.81097		0.990336	1.12316			0.0605486	0.0337957		1.26674	1.15531		0.301997	0.629268		0.0689056	0.0259342
564 ms	1.55734	1.42385		3.61517	0.835824		3.60811	0.898178		2.53784	1.0026			0.086625	0.0690912		3.24449	1.67628		2.80848	1.81785		1.01493	1.14126			0.061723	0.0332882		1.27983	1.16091		0.306828	0.630314		0.0698491	0.0266756
565 ms	1.54657	1.42632		3.59656	0.840253		3.59192	0.904165		2.52589	1.00712			0.086746	0.0693343		3.25846	1.67815		2.83624	1.82488		1.03982	1.15916			0.0610135	0.0341134		1.29225	1.16543		0.311613	0.63042		0.0696683	0.0266512
566 ms	1.53609	1.42912		3.57798	0.844851		3.57583	0.910304		2.51408	1.01164			0.0871734	0.0691462		3.27226	1.68021		2.86422	1.83171		1.06502	1.1772			0.0612567	0.0348738		1.30509	1.17032		0.316746	0.631055		0.0706754	0.0272934
567 ms	1.52595	1.43175		3.55946	0.84936		3.55975	0.916486		2.50239	1.01608			0.0869471	0.0692415		3.28578	1.68214		2.89156	1.8381		1.09042	1.19529			0.0610884	0.0349163		1.31826	1.17508		0.322355	0.632857		0.070433	0.0275347
568 ms	1.51615	1.43419		3.5411	0.854		3.54364	0.922782		2.49077	1.02051			0.0868688	0.0691253		3.29935	1.68422		2.91874	1.84428		1.11637	1.21324			0.0600979	0.0356426		1.33186	1.18009		0.32792	0.635682		0.07083	0.0278881
569 ms	1.50672	1.43649		3.52276	0.858747		3.52771	0.928989		2.47921	1.02471			0.0869	0.0691429		3.31244	1.6862		2.94582	1.85037		1.14276	1.23065			0.060335	0.0363068		1.34532	1.18445		0.334147	0.64008		0.0703413	0.0285308
570 ms	1.49749	1.43873		3.5046	0.863618		3.51182	0.935199		2.46777	1.0288			0.0867402	0.0686993		3.32554	1.68831		2.97237	1.85636		1.1693	1.24831			0.0606915	0.0366209		1.35904	1.18938		0.340709	0.644791		0.0710977	0.0297476
571 ms	1.4885	1.44095		3.48643	0.868491		3.49612	0.94158		2.4564	1.03282			0.0850906	0.0677007		3.33857	1.69019		2.99886	1.86177		1.19618	1.26614			0.0602253	0.0359688		1.37362	1.19382		0.346963	0.649093		0.0710472	0.0298121
572 ms	1.47975	1.4434		3.46846	0.873371		3.48047	0.947959		2.44512	1.03671			0.08505	0.0674394		3.35181	1.69222		3.02524	1.86689		1.22361	1.28411			0.0607024	0.0359121		1.38833	1.19871		0.353739	0.650683		0.0716576	0.0309292
573 ms	1.47152	1.44587		3.45053	0.878156		3.4649	0.954276		2.4339	1.04045			0.0841002	0.0671069		3.36467	1.69435		3.0516	1.87196		1.25122	1.3016			0.060787	0.0362696		1.40256	1.2037		0.360066	0.650995		0.0720529	0.0307173
574 ms	1.46305	1.44855		3.43285	0.883211		3.44944	0.960652		2.42277	1.04428			0.0845025	0.0674821		3.37791	1.69593		3.07788	1.87693		1.27913	1.31896			0.0608171	0.0361675		1.417	1.20904		0.365805	0.649373		0.07238	0.0314003
575 ms	1.45473	1.45144		3.41525	0.888123		3.43405	0.966937		2.41176	1.04798			0.0846794	0.0671992		3.39078	1.69744		3.10367	1.88175		1.30739	1.33607			0.0612845	0.0353177		1.43106	1.21426		0.372207	0.646966		0.0728505	0.0315474
576 ms	1.44654	1.45419		3.39784	0.893348		3.41866	0.973198		2.40091	1.05158			0.0841531	0.0663879		3.40392	1.69919		3.1294	1.88558		1.336	1.35321			0.0611329	0.0350319		1.44581	1.21989		0.378459	0.645008		0.0735559	0.0319453
577 ms	1.43829	1.45694		3.38027	0.89843		3.40346	0.979556		2.39006	1.05526			0.0838476	0.0657542		3.41677	1.70072		3.15517	1.88944		1.36483	1.37019			0.0603986	0.0351274		1.46078	1.22507		0.385483	0.643677		0.0737296	0.032619
578 ms	1.43014	1.45931		3.36293	0.903601		3.38836	0.985775		2.37942	1.05886			0.0853712	0.0666153		3.4296	1.70208		3.18072	1.89344		1.39409	1.38695			0.0592183	0.0355505		1.47467	1.23084		0.393347	0.644243		0.0736595	0.0327893
579 ms	1.42208	1.46158		3.34568	0.908811		3.37323	0.991902		2.36881	1.06244			0.0858789	0.0669172		3.44223	1.70364		3.20651	1.89709		1.42331	1.40351			0.0593902	0.0351067		1.48917	1.23673		0.401078	0.647694		0.0741351	0.0327256
580 ms	1.41378	1.46371		3.32861	0.914163		3.35834	0.998164		2.35836	1.06596			0.0870624	0.0680487		3.45512	1.70485		3.23175	1.90027		1.4528	1.41995			0.0597427	0.0347616		1.50403	1.24192		0.409874	0.652367		0.0741655	0.0336078
581 ms	1.40612	1.4657		3.31152	0.919512		3.34345	1.00435		2.348	1.06922			0.0873381	0.0673495		3.46737	1.70649		3.25693	1.90344		1.48248	1.43631			0.0596778	0.033776		1.51843	1.24708		0.419122	0.658502		0.0741444	0.0335226
582 ms	1.39866	1.46781		3.29452	0.924825		3.32878	1.01045		2.33775	1.07254			0.0876927	0.067338		3.47952	1.70804		3.28212	1.90639		1.5121	1.45267			0.0597401	0.0343432		1.53367	1.25249		0.428489	0.665153		0.0743057	0.0332509
583 ms	1.3915	1.47019		3.27758	0.929907		3.31418	1.01648		2.32759	1.07578			0.0881573	0.0676359		3.49185	1.70885		3.30728	1.90945		1.54183	1.46933			0.0599168	0.0341657		1.54813	1.25765		0.438509	0.671298		0.0751701	0.0330168
584 ms	1.38476	1.47262		3.26089	0.935272		3.29957	1.02246		2.31756	1.07891			0.0885093	0.0676239		3.50391	1.71019		3.33235	1.91215		1.57221	1.48521			0.059697	0.0336829		1.56294	1.2631		0.449143	0.67809		0.0748539	0.0323611
585 ms	1.37828	1.47509		3.24425	0.940692		3.28493	1.02821		2.30751	1.08194			0.087414	0.0667165		3.51604	1.71157		3.35715	1.91458		1.60264	1.50088			0.0607269	0.0328203		1.57803	1.2681		0.459571	0.685102		0.0750589	0.0325919
586 ms	1.37212	1.47756		3.22758	0.946053		3.27051	1.03393		2.29762	1.08474			0.0875549	0.0666116		3.52791	1.71293		3.38164	1.91687		1.63297	1.51622			0.0607713	0.0334082		1.59282	1.27286		0.470973	0.691416		0.0752698	0.0330239
587 ms	1.36624	1.47965		3.21103	0.951263		3.25599	1.03962		2.2878	1.08735			0.087077	0.0657152		3.53969	1.71397		3.40607	1.91915		1.66341	1.53106			0.060464	0.0333796		1.60787	1.27822		0.481512	0.698473		0.0758755	0.0323184
588 ms	1.36027	1.48158		3.19453	0.956398		3.24169	1.04505		2.27803	1.08991			0.0866431	0.0657065		3.55176	1.71486		3.43007	1.92127		1.69394	1.54569			0.0603675	0.0342795		1.62281	1.28319		0.492438	0.705172		0.076512	0.0332927
589 ms	1.35437	1.4829		3.1781	0.961641		3.22737	1.05052		2.26835	1.09232			0.086057	0.0649531		3.56392	1.7158		3.45432	1.92332		1.72442	1.55999			0.0601781	0.0335698		1.63667	1.28807		0.503447	0.712521		0.076628	0.0343495
590 ms	1.34836	1.48372		3.16175	0.966837		3.21309	1.05605		2.2587	1.09457			0.0859406	0.0643406		3.57568	1.71731		3.47783	1.92521		1.75514	1.57378			0.0606713	0.0338636		1.65153	1.29301		0.514607	0.721102		0.0761325	0.0347148
591 ms	1.34237	1.48449		3.14539	0.97172		3.19889	1.06134		2.24914	1.09673			0.0865233	0.0644517		3.58767	1.71845		3.50089	1.92691		1.78598	1.58728			0.0607503	0.0335972		1.66571	1.29788		0.525382	0.72926		0.0767616	0.035228
592 ms	1.33652	1.48556		3.12909	0.976681		3.18471	1.06666		2.23969	1.09873			0.0868863	0.0647029		3.59955	1.71926		3.52423	1.9286		1.81644	1.60023			0.0605522	0.033023		1.67969	1.30318		0.537221	0.7383		0.0770918	0.0351566
593 ms	1.33055	1.48624		3.11279	0.981438		3.1706	1.07174		2.23026	1.10072			0.086864	0.0632158		3.61125	1.72		3.54697	1.92978		1.84698	1.61303			0.0606539	0.0324363		1.69412	1.30839		0.549277	0.74835		0.0773674	0.0353339
594 ms	1.32464	1.48701		3.09676	0.986165		3.15666	1.07662		2.2209	1.10272			0.087743	0.0634286		3.62304	1.72117		3.56965	1.93093		1.87737	1.62572			0.0616492	0.0330213		1.70889	1.31289		0.561485	0.758479		0.0771132	0.0362176
595 ms	1.31886	1.48783		3.08088	0.99078		3.14263	1.08147		2.2116	1.10457			0.0876293	0.0634348		3.63453	1.72226		3.59201	1.93177		1.90803	1.63771			0.0616674	0.0327221		1.72322	1.31813		0.573914	0.769018		0.0778255	0.0358206
596 ms	1.31316	1.48857		3.065	0.995319		3.12879	1.0862		2.20229	1.1062			0.0876766	0.0632081		3.64591	1.72347		3.61383	1.93231		1.93902	1.64954			0.0619859	0.0334004		1.73851	1.32331		0.587206	0.779245		0.0779422	0.0356774
597 ms	1.30769	1.48933		3.04921	0.99973		3.11494	1.09071		2.19311	1.10784			0.0881617	0.0632097		3.65752	1.72415		3.63568	1.93269		1.96962	1.661			0.0611454	0.0332952		1.75322	1.32874		0.601043	0.790072		0.0784887	0.0361083
598 ms	1.30233	1.48983		3.0338	1.00408		3.10123	1.09518		2.18392	1.10933			0.087679	0.0631383		3.66867	1.72497		3.65735	1.93299		2.00005	1.67216			0.0612253	0.0337371		1.76811	1.33363		0.614967	0.801493		0.078809	0.0367837
599 ms	1.29693	1.49013		3.01831	1.0083		3.08765	1.09944		2.17474	1.11083			0.0878218	0.0625936		3.67975	1.72601		3.67854	1.93331		2.03046	1.68331			0.0609423	0.0337445		1.78311	1.33797		0.628603	0.812778		0.0796232	0.0367783
600 ms	1.29177	1.49038		3.00303	1.01244		3.07402	1.10389		2.16565	1.11216			0.0881101	0.0639536		3.69082	1.72693		3.69951	1.93388		2.06142	1.69378			0.0605948	0.0336458		1.79799	1.3429		0.642834	0.823815		0.079524	0.0369942
601 ms	1.28675	1.49073		2.98777	1.01645		3.06046	1.10812		2.15658	1.11334			0.0881882	0.0632787		3.7017	1.72771		3.72035	1.93394		2.09231	1.70411			0.0598785	0.0331894		1.8121	1.34769		0.657393	0.835184		0.0799266	0.0373525
602 ms	1.28214	1.49114		2.97253	1.02028		3.04704	1.11243		2.1476	1.11441			0.0886371	0.0631332		3.7125	1.72864		3.74113	1.93419		2.12307	1.71415			0.0593037	0.0335047		1.82679	1.35223		0.672588	0.846332		0.0801017	0.0379726
603 ms	1.27773	1.49146		2.95749	1.02395		3.03362	1.1165		2.13869	1.1154			0.088701	0.0630866		3.72309	1.72938		3.76196	1.93419		2.15372	1.72404			0.0593002	0.0330296		1.84138	1.35629		0.688089	0.857973		0.0807607	0.0386179
604 ms	1.27341	1.49173		2.94249	1.02774		3.02036	1.12059		2.12975	1.11628			0.0889424	0.0639478		3.73348	1.73024		3.78262	1.93418		2.18481	1.73367			0.0597216	0.0327118		1.8561	1.36053		0.703108	0.868859		0.0813487	0.0390393
605 ms	1.26937	1.4919		2.92742	1.0314		3.0072	1.12448		2.12094	1.11705			0.089143	0.0633683		3.74411	1.73102		3.80281	1.93395		2.2157	1.74289			0.0599111	0.0331541		1.87071	1.36507		0.718121	0.879738		0.0821628	0.0387688
606 ms	1.26549	1.49177		2.91257	1.03488		2.99405	1.12847		2.11221	1.11773			0.089523	0.0633055		3.75463	1.73175		3.82282	1.93349		2.24661	1.75205			0.0605662	0.0341399		1.88504	1.36964		0.733257	0.890391		0.0821311	0.0394772
607 ms	1.26134	1.49114		2.89784	1.03831		2.98098	1.13227		2.10348	1.11841			0.0899404	0.0625059		3.76496	1.73223		3.84317	1.9328		2.27715	1.76096			0.0607643	0.0339162		1.89942	1.3735		0.748761	0.900769		0.0824002	0.0398165
608 ms	1.25721	1.49022		2.883	1.04168		2.96802	1.13605		2.09485	1.11909			0.0896586	0.0631348		3.77528	1.73275		3.86318	1.93221		2.30784	1.76969			0.0607673	0.0342568		1.91395	1.37785		0.76432	0.911388		0.0830779	0.0407895
609 ms	1.25285	1.48906		2.8683	1.04493		2.95512	1.13975		2.08625	1.11978			0.0908554	0.0632238		3.78561	1.73282		3.88312	1.93131		2.3383	1.77781			0.0618988	0.0347398		1.92823	1.38154		0.780168	0.921304		0.0832528	0.0409841
610 ms	1.24827	1.48784		2.85359	1.04829		2.94233	1.14339		2.07767	1.12054			0.0915236	0.0634851		3.79563	1.73294		3.90239	1.93071		2.36885	1.78538			0.0609013	0.0345508		1.94204	1.38632		0.795537	0.931724		0.0838828	0.0418701
611 ms	1.24365	1.48649		2.83902	1.05139		2.92957	1.14692		2.06909	1.1212			0.0911756	0.0630296		3.80554	1.73324		3.92147	1.93013		2.39911	1.79282			0.0607608	0.0351462		1.95579	1.39017		0.811207	0.942239		0.0848767	0.0427104
612 ms	1.23899	1.48509		2.82448	1.0545		2.91687	1.15045		2.06067	1.12187			0.0916779	0.0636995		3.81516	1.73341		3.9409	1.92943		2.42935	1.8001			0.0610397	0.0347919		1.97022	1.39398		0.828056	0.952652		0.0853245	0.0438585
613 ms	1.23446	1.48375		2.81004	1.05744		2.90432	1.15392		2.05218	1.12255			0.0916514	0.0637735		3.82462	1.73388		3.95983	1.92857		2.45958	1.80671			0.060951	0.0347667		1.98425	1.39749		0.844793	0.963555		0.0857308	0.0452254
614 ms	1.22977	1.48259		2.79573	1.06032		2.89193	1.15727		2.04382	1.12324			0.0914416	0.0635438		3.83412	1.73446		3.97842	1.9277		2.48987	1.8133			0.0613365	0.0345405		1.99825	1.40151		0.862024	0.974459		0.0865258	0.046485
615 ms	1.22531	1.48135		2.78138	1.06334		2.87957	1.16061		2.03549	1.12386			0.0920045	0.0637135		3.8434	1.73474		3.99674	1.927		2.52012	1.81951			0.0606918	0.034654		2.01249	1.40471		0.879047	0.985128		0.0871413	0.0475551
616 ms	1.22102	1.48007		2.76723	1.06638		2.86727	1.16382		2.02723	1.12445			0.09202	0.0639433		3.85257	1.73518		4.0147	1.92629		2.55047	1.82519			0.0602226	0.0342831		2.02693	1.4088		0.896198	0.99693		0.0876814	0.0486909
617 ms	1.21695	1.47864		2.75315	1.06908		2.85494	1.16704		2.01905	1.12496			0.0914879	0.0642812		3.8618	1.73564		4.03263	1.92548		2.5806	1.83108			0.0606627	0.034856		2.04118	1.41194		0.913811	1.00822		0.0881592	0.049812
618 ms	1.21298	1.47702		2.73911	1.07199		2.84278	1.17014		2.0109	1.1255			0.0922577	0.0648321		3.87089	1.73607		4.05045	1.92441		2.61048	1.83641			0.0603622	0.0347565		2.05548	1.41557		0.932051	1.01984		0.0884067	0.0511519
619 ms	1.20917	1.47548		2.72516	1.07456		2.83068	1.17306		2.00276	1.12593			0.092777	0.0642962		3.88009	1.7364		4.06775	1.92362		2.64023	1.84143			0.0598623	0.0344403		2.06928	1.4187		0.949929	1.03139		0.0892082	0.0524072
620 ms	1.20544	1.47363		2.71127	1.07729		2.81857	1.17594		1.9947	1.12627			0.0934774	0.0652069		3.88919	1.73663		4.08498	1.92283		2.66987	1.84637			0.0594414	0.0345385		2.08313	1.42234		0.968126	1.04248		0.0900564	0.0535604
621 ms	1.20235	1.47196		2.69738	1.08004		2.8064	1.17902		1.98668	1.1265			0.0947043	0.0656902		3.89826	1.7366		4.10184	1.92198		2.69952	1.85072			0.0595455	0.0354844		2.0974	1.42544		0.985706	1.05301		0.0913899	0.0547718
622 ms	1.19916	1.47026		2.68382	1.08257		2.79446	1.18189		1.97866	1.12676			0.0951377	0.0658397		3.90732	1.73684		4.11851	1.92075		2.72887	1.85491			0.060535	0.0348858		2.11142	1.42878		1.00397	1.06334		0.0928672	0.0564739
623 ms	1.19587	1.46838		2.67016	1.0851		2.78263	1.18449		1.97067	1.1269			0.0956672	0.0655955		3.91616	1.73711		4.13489	1.91964		2.75809	1.85933			0.0604533	0.0356728		2.12508	1.43149		1.022	1.07358		0.0945604	0.0581472
624 ms	1.19256	1.46634		2.65672	1.08771		2.77084	1.18717		1.96277	1.12708			0.0972578	0.0653653		3.92498	1.73736		4.15112	1.91833		2.78726	1.86318			0.0611241	0.0365435		2.13906	1.43472		1.03983	1.08402		0.0955368	0.0598054
625 ms	1.18907	1.4643		2.6434	1.08995		2.75895	1.18992		1.95499	1.12717			0.0974333	0.0651365		3.93365	1.73755		4.16723	1.91695		2.81629	1.86698			0.0614968	0.0366998		2.15322	1.4376		1.05722	1.09417		0.0966098	0.0617458
626 ms	1.18529	1.46189		2.63015	1.09247		2.74723	1.19278		1.94714	1.12729			0.0975625	0.0653681		3.94214	1.73759		4.18293	1.91548		2.84548	1.87043			0.062271	0.036189		2.1675	1.44034		1.07509	1.10448		0.0979304	0.0637911
627 ms	1.18145	1.45973		2.61707	1.09488		2.73571	1.19539		1.93939	1.12737			0.0976147	0.0651819		3.95047	1.73756		4.19853	1.91382		2.87477	1.8737			0.0625878	0.035767		2.18201	1.44289		1.09341	1.11435		0.0996402	0.0659692
628 ms	1.17754	1.45765		2.60405	1.09718		2.72435	1.1978		1.93165	1.12744			0.0975609	0.0655941		3.95885	1.73762		4.214	1.91217		2.9038	1.87697			0.0625362	0.0352677		2.19579	1.44538		1.11106	1.12543		0.101495	0.0684517
629 ms	1.17354	1.45567		2.59112	1.09942		2.71293	1.20014		1.92392	1.12744			0.0976083	0.0656551		3.96713	1.73712		4.22938	1.91056		2.93257	1.87988			0.0629752	0.0345792		2.20963	1.44792		1.12917	1.13595		0.102867	0.0712085
630 ms	1.16939	1.45334		2.57828	1.10154		2.7015	1.20264		1.91622	1.12741			0.0972821	0.0659087		3.97534	1.73678		4.24472	1.90876		2.96103	1.88286			0.063242	0.0339015		2.22359	1.45014		1.14682	1.147		0.104293	0.0742793
631 ms	1.16537	1.45119		2.56548	1.1038		2.69028	1.20501		1.90854	1.1274			0.0970719	0.065965		3.98355	1.73616		4.26002	1.90678		2.98948	1.88559			0.0631261	0.0336019		2.2375	1.45218		1.16482	1.15736		0.106109	0.0783506
632 ms	1.16154	1.44934		2.55281	1.10602		2.67925	1.20721		1.90091	1.12742			0.0974579	0.0668725		3.99154	1.73582		4.27506	1.90479		3.01777	1.8881			0.0634686	0.034229		2.2509	1.45457		1.18296	1.16791		0.108488	0.0822767
633 ms	1.15781	1.44707		2.54039	1.10825		2.66817	1.20927		1.89336	1.12738			0.0980386	0.066722		3.99961	1.73525		4.29046	1.90287		3.04572	1.89062			0.0629274	0.0349952		2.26316	1.45749		1.20067	1.17829		0.110004	0.086479
634 ms	1.15425	1.44462		2.52793	1.11044		2.65701	1.21158		1.88585	1.12742			0.0996942	0.0671945		4.00779	1.73464		4.30583	1.90081		3.07354	1.8928			0.063946	0.0356143		2.27626	1.45967		1.21765	1.18854		0.11211	0.0901965
635 ms	1.15068	1.44173		2.51569	1.11272		2.64587	1.21394		1.87841	1.12736			0.0996316	0.0676112		4.01555	1.73404		4.32091	1.89888		3.10089	1.89505			0.0636198	0.0364996		2.28949	1.46145		1.23542	1.19877		0.113788	0.0947205
636 ms	1.14736	1.43871		2.50347	1.11491		2.63476	1.21637		1.87102	1.12736			0.0999205	0.0683875		4.02313	1.73374		4.33593	1.89683		3.12837	1.89728			0.0627306	0.0380433		2.30213	1.464		1.252	1.20919		0.116086	0.0987658
637 ms	1.14442	1.43625		2.49142	1.11733		2.6239	1.21867		1.86373	1.12735			0.100619	0.0683954		4.03066	1.73334		4.35078	1.89466		3.15575	1.89907			0.06304	0.0376936		2.31481	1.46641		1.26896	1.21872		0.118101	0.10352
638 ms	1.14148	1.43375		2.47961	1.11927		2.61311	1.22081		1.85655	1.12726			0.101443	0.0688432		4.03811	1.73301		4.36547	1.89286		3.18297	1.9009			0.0632392	0.0374652		2.32731	1.46867		1.28611	1.22837		0.120948	0.107348
639 ms	1.13852	1.43088		2.46783	1.12136		2.60232	1.22301		1.8494	1.1272			0.102144	0.0691242		4.04569	1.73228		4.38016	1.89114		3.21035	1.90239			0.0625475	0.0368277		2.33959	1.47081		1.30261	1.23775		0.123029	0.111801
640 ms	1.13545	1.42831		2.45602	1.12326		2.59163	1.22521		1.84225	1.1271			0.103498	0.0701655		4.05304	1.73197		4.39446	1.88896		3.23743	1.90372			0.0624927	0.0365188		2.35268	1.47244		1.31906	1.24716		0.125682	0.11703
641 ms	1.13241	1.42603		2.44439	1.12515		2.58103	1.22724		1.83522	1.12699			0.10399	0.0703444		4.06022	1.73144		4.40855	1.88684		3.26403	1.90538			0.0616871	0.0369738		2.365	1.47458		1.3357	1.25628		0.12836	0.121999
642 ms	1.1292	1.42358		2.43294	1.12711		2.57056	1.2292		1.82822	1.12694			0.105206	0.0700831		4.06738	1.73087		4.42217	1.88459		3.29064	1.90655			0.0625118	0.0364111		2.37753	1.47662		1.35232	1.26458		0.130919	0.126977
643 ms	1.12585	1.42138		2.42164	1.12912		2.56014	1.23105		1.82131	1.12682			0.106594	0.0708577		4.07454	1.73004		4.43566	1.88201		3.31681	1.90748			0.0624376	0.0358558		2.38972	1.47828		1.36896	1.27278		0.132814	0.132414
644 ms	1.12223	1.41895		2.4105	1.13083		2.5497	1.23296		1.81444	1.12671			0.108104	0.0729606		4.08169	1.72935		4.44892	1.87979		3.34294	1.90824			0.0615452	0.0360722		2.40181	1.48044		1.38584	1.28128		0.13584	0.13791
645 ms	1.11855	1.41643		2.39935	1.13293		2.53928	1.23478		1.80752	1.12656			0.109131	0.0735391		4.08836	1.72898		4.46201	1.87728		3.36848	1.90927			0.0610035	0.0366154		2.41387	1.48286		1.40229	1.28926		0.138295	0.143457
646 ms	1.1148	1.41413		2.38836	1.13496		2.52905	1.23667		1.80071	1.12638			0.111111	0.0750588		4.0951	1.72818		4.47464	1.87454		3.39381	1.91035			0.0609367	0.0376655		2.42674	1.48472		1.41942	1.29733		0.141177	0.148932
647 ms	1.11118	1.41195		2.3775	1.13707		2.51883	1.23835		1.79388	1.12624			0.111358	0.0767949		4.10164	1.7275		4.48706	1.8722		3.41864	1.91144			0.0617399	0.038453		2.43942	1.48668		1.43676	1.30491		0.143983	0.154224
648 ms	1.10762	1.40992		2.36667	1.139		2.50879	1.24004		1.78707	1.12611			0.112027	0.0782793		4.1079	1.72706		4.49884	1.86977		3.44354	1.91166			0.0618253	0.0378427		2.45216	1.48902		1.45353	1.31239		0.146333	0.160177
649 ms	1.10427	1.40791		2.35586	1.14082		2.49877	1.24159		1.78029	1.12594			0.113577	0.0799903		4.11447	1.72681		4.51159	1.86711		3.46854	1.91172			0.0610198	0.0381362		2.46421	1.49139		1.46995	1.31961		0.149635	0.16647
650 ms	1.10105	1.40585		2.34519	1.14264		2.48874	1.24324		1.77352	1.12574			0.114772	0.0820838		4.12074	1.72641		4.52352	1.86491		3.49337	1.91177			0.0612665	0.0386674		2.47675	1.49372		1.48611	1.3268		0.153287	0.173233
651 ms	1.0981	1.40363		2.33453	1.14471		2.47893	1.24468		1.76679	1.12556			0.11516	0.0835821		4.12704	1.72589		4.53555	1.86212		3.51736	1.91256			0.0613284	0.0388811		2.48963	1.496		1.50195	1.3336		0.156418	0.180184
652 ms	1.09516	1.40151		2.32403	1.14659		2.46913	1.24613		1.76014	1.12538			0.116125	0.0857963		4.13348	1.72504		4.54762	1.85933		3.5413	1.91301			0.0616801	0.0391367		2.50248	1.49716		1.51736	1.34044		0.159704	0.187418
653 ms	1.0925	1.39915		2.31369	1.14826		2.4593	1.24754		1.75348	1.12512			0.117075	0.0866484		4.13962	1.72441		4.5595	1.85659		3.56508	1.91313			0.0615293	0.0391198		2.5144	1.49891		1.53288	1.34671		0.163011	0.194883
654 ms	1.08987	1.39659		2.30354	1.14982		2.44967	1.24895		1.74692	1.12474			0.118692	0.0878788		4.14601	1.72376		4.57134	1.85323		3.58903	1.91315			0.0610936	0.0390638		2.52603	1.50075		1.54791	1.3522		0.167098	0.202888
655 ms	1.08716	1.39354		2.29351	1.15136		2.43997	1.25024		1.74033	1.12432			0.120594	0.0900784		4.15222	1.72272		4.58354	1.85024		3.61281	1.91356			0.0609917	0.0382563		2.53716	1.50249		1.56265	1.35758		0.171341	0.210969
656 ms	1.08431	1.39062		2.28352	1.15296		2.43049	1.25154		1.73366	1.12385			0.122436	0.0925333		4.15822	1.72163		4.59489	1.84698		3.63661	1.914			0.061314	0.038255		2.54852	1.50438		1.57722	1.36272		0.174758	0.218788
657 ms	1.0815	1.38772		2.27354	1.15454		2.42116	1.2527		1.72715	1.12347			0.124953	0.0947125		4.16406	1.72102		4.60688	1.84365		3.66147	1.91517			0.0617742	0.038017		2.56002	1.50577		1.59203	1.36778		0.178866	0.226672
658 ms	1.07837	1.38483		2.26359	1.15594		2.4116	1.25397		1.72066	1.12306			0.129936	0.0978262		4.16961	1.7202		4.61862	1.84062		3.68838	1.91593			0.0624126	0.0375163		2.57118	1.50732		1.60609	1.3726		0.183324	0.234733
659 ms	1.07527	1.38207		2.2537	1.15723		2.40216	1.25529		1.71417	1.12256			0.134737	0.10145		4.1752	1.71972		4.6307	1.83749		3.71742	1.91713			0.062029	0.0364091		2.58194	1.50869		1.62064	1.37727		0.187429	0.243726
660 ms	1.07192	1.37949		2.24388	1.15854		2.39287	1.25644		1.70771	1.12216			0.141042	0.107337		4.1808	1.71933		4.64346	1.83448		3.74939	1.91903			0.0615912	0.0354987		2.5928	1.51063		1.63469	1.38093		0.1912	0.252701
661 ms	1.06852	1.37701		2.23403	1.15999		2.38357	1.25764		1.70134	1.12176			0.150868	0.115492		4.1864	1.71866		4.65698	1.83181		3.78532	1.92127			0.0609268	0.0357745		2.60332	1.51237		1.64859	1.38528		0.194922	0.261592
662 ms	1.0649	1.37461		2.22438	1.16143		2.37443	1.25866		1.69498	1.12134			0.163038	0.126473		4.19244	1.71804		4.67182	1.82886		3.82592	1.92399			0.0615069	0.0358955		2.61496	1.51328		1.6627	1.38883		0.199124	0.270244
663 ms	1.06141	1.37214		2.21477	1.16265		2.36524	1.2596		1.68877	1.12101			0.178765	0.142038		4.19845	1.71742		4.68775	1.82608		3.87157	1.92749			0.061406	0.0355859		2.62614	1.51471		1.67673	1.39262		0.203665	0.279752
664 ms	1.0578	1.36961		2.20537	1.1637		2.35614	1.26047		1.68241	1.12048			0.198833	0.163147		4.20539	1.71634		4.70475	1.82304		3.92252	1.92959			0.0607915	0.0354171		2.63691	1.51638		1.69077	1.39544		0.207495	0.289321
665 ms	1.05433	1.36705		2.196	1.16461		2.34721	1.26126		1.67611	1.11998			0.222275	0.191096		4.21253	1.71567		4.7229	1.81963		3.97728	1.93259			0.0604508	0.0355229		2.64769	1.51759		1.70554	1.39766		0.211444	0.298829
666 ms	1.05094	1.36444		2.18671	1.16564		2.33834	1.26197		1.66982	1.11946			0.252835	0.228158		4.22029	1.71446		4.74172	1.81619		4.03594	1.93492			0.0602818	0.0346349		2.65876	1.5193		1.71946	1.40027		0.216298	0.308564
667 ms	1.04775	1.36162		2.17751	1.16657		2.32941	1.26267		1.66362	1.11889			0.287581	0.273264		4.22845	1.71311		4.76115	1.81242		4.0972	1.93657			0.0605763	0.0344707		2.66948	1.52111		1.73396	1.40314		0.221589	0.317931
668 ms	1.04462	1.35862		2.16828	1.16748		2.32059	1.26341		1.65736	1.11829			0.326872	0.325818		4.23706	1.71187		4.7808	1.8081		4.15943	1.93782			0.06061	0.0338611		2.68074	1.52262		1.74855	1.40542		0.22656	0.3274
669 ms	1.04153	1.35544		2.159	1.16846		2.31171	1.26407		1.65115	1.11763			0.37173	0.385429		4.24643	1.71057		4.80092	1.80347		4.22189	1.93776			0.0596963	0.0345035		2.691	1.52459		1.76356	1.40806		0.231631	0.33708
670 ms	1.03847	1.35199		2.1499	1.1693		2.30298	1.26475		1.64493	1.11686			0.421305	0.451641		4.25587	1.70899		4.82045	1.79874		4.28339	1.93632			0.0596411	0.0345621		2.70117	1.5262		1.77873	1.41081		0.236519	0.346593
671 ms	1.03548	1.34866		2.14085	1.17023		2.29429	1.26538		1.63885	1.11609			0.475233	0.521295		4.26559	1.7074		4.83972	1.79362		4.34247	1.93499			0.059994	0.0349564		2.71131	1.52796		1.79425	1.41348		0.242425	0.355976
672 ms	1.03248	1.34524		2.13201	1.17098		2.28563	1.26593		1.63281	1.11536			0.533395	0.59347		4.27594	1.70525		4.85914	1.7887		4.39977	1.93167			0.0600605	0.03478		2.7217	1.53006		1.80952	1.41634		0.247627	0.36568
673 ms	1.02941	1.34179		2.12323	1.17172		2.27703	1.26648		1.62678	1.11462			0.59396	0.666742		4.28648	1.70282		4.87804	1.78331		4.45413	1.92786			0.0609357	0.035805		2.73225	1.53169		1.82552	1.41868		0.252442	0.375057
674 ms	1.0262	1.33866		2.11447	1.17256		2.26848	1.26707		1.62072	1.11375			0.659234	0.738623		4.29774	1.7		4.89688	1.77772		4.50582	1.92259			0.061652	0.0364704		2.74331	1.53257		1.84148	1.42138		0.257093	0.385242
675 ms	1.02293	1.33556		2.10592	1.17323		2.25998	1.26753		1.61476	1.11293			0.728076	0.807657		4.30932	1.69699		4.91591	1.77196		4.55533	1.91629			0.0623941	0.0367999		2.75356	1.53434		1.85804	1.42408		0.262305	0.394859
676 ms	1.01971	1.3327		2.09749	1.17388		2.2517	1.26815		1.60884	1.11205			0.8004	0.874534		4.32109	1.6935		4.93405	1.76626		4.60263	1.90913			0.0630582	0.0364051		2.76389	1.53569		1.87431	1.42684		0.267213	0.40509
677 ms	1.01641	1.33028		2.08913	1.17461		2.24336	1.26864		1.60309	1.1112			0.876975	0.937368		4.33356	1.68976		4.95303	1.76034		4.64834	1.90197			0.0625835	0.0356728		2.77464	1.53724		1.88998	1.42947		0.27241	0.415629
678 ms	1.0129	1.32744		2.08067	1.17511		2.23498	1.26906		1.59723	1.11045			0.958779	0.997598		4.34626	1.68553		4.97227	1.75445		4.69329	1.89417			0.0628845	0.0362689		2.7859	1.53777		1.90618	1.4326		0.277207	0.426488
679 ms	1.00936	1.32458		2.07218	1.17573		2.22695	1.26951		1.59133	1.10955			1.04723	1.05536		4.35964	1.68064		4.99189	1.74824		4.73819	1.88563			0.0622239	0.0362046		2.79656	1.5387		1.92274	1.43572		0.282831	0.436863
680 ms	1.0058	1.32175		2.06378	1.17627		2.21881	1.26987		1.58548	1.10863			1.14202	1.1121		4.37325	1.67569		5.01203	1.74229		4.78373	1.87638			0.0618458	0.0355665		2.80681	1.5399		1.93896	1.43908		0.289082	0.447153
681 ms	1.00239	1.31883		2.05545	1.17665		2.21089	1.27016		1.5797	1.1078			1.24229	1.16817		4.38693	1.67071		5.03283	1.73671		4.83055	1.86734			0.0616431	0.0345282		2.81688	1.54082		1.9553	1.44217		0.295315	0.457111
682 ms	0.999054	1.31604		2.04711	1.17705		2.20304	1.27035		1.5739	1.10687			1.34821	1.22485		4.40074	1.66513		5.05396	1.73151		4.87868	1.85811			0.0617856	0.0341894		2.82761	1.54166		1.97132	1.44551		0.301643	0.468041
683 ms	0.995859	1.31304		2.03893	1.17739		2.19533	1.27045		1.56816	1.10602			1.46022	1.28112		4.41429	1.65978		5.07565	1.7266		4.92828	1.84915			0.0615918	0.0341608		2.83825	1.54283		1.98748	1.44901		0.307442	0.478362
684 ms	0.992769	1.31001		2.03065	1.17755		2.18776	1.27066		1.56236	1.10502			1.57741	1.33697		4.42795	1.65392		5.09715	1.72185		4.97906	1.83958			0.0621209	0.0347087		2.84884	1.5432		2.00432	1.45198		0.313569	0.48868
685 ms	0.98979	1.30669		2.02256	1.17787		2.18027	1.27105		1.5567	1.10391			1.69692	1.39227		4.44115	1.64818		5.11854	1.71755		5.03043	1.83043			0.0611027	0.0340452		2.85936	1.54466		2.0213	1.45508		0.319628	0.498832
686 ms	0.986833	1.30313		2.01454	1.17802		2.17256	1.2715		1.55106	1.10274			1.81633	1.4456		4.45395	1.64275		5.13898	1.71382		5.08113	1.82147			0.0620672	0.0336558		2.8701	1.54558		2.038	1.45791		0.325644	0.509581
687 ms	0.98402	1.29956		2.00663	1.17811		2.16502	1.27188		1.54543	1.10167			1.93618	1.4958		4.46609	1.6371		5.15885	1.7101		5.13064	1.81311			0.0617566	0.0338943		2.88063	1.54685		2.05475	1.46102		0.331064	0.520159
688 ms	0.980923	1.29534		1.99876	1.17807		2.15742	1.27229		1.53986	1.1005			2.05385	1.54341		4.47752	1.63139		5.17706	1.70658		5.17784	1.80537			0.0613831	0.0343382		2.89151	1.54824		2.07119	1.46444		0.337073	0.530935
689 ms	0.977732	1.29106		1.99095	1.17817		2.14986	1.27265		1.53429	1.09937			2.17005	1.58661		4.48892	1.62588		5.19465	1.70289		5.22272	1.79756			0.0614271	0.0348228		2.90229	1.54927		2.08739	1.46779		0.343134	0.540905
690 ms	0.974227	1.28656		1.98311	1.17803		2.14224	1.273		1.52873	1.09813			2.28066	1.62611		4.49953	1.62001		5.21004	1.69909		5.26377	1.79027			0.0609809	0.035187		2.91264	1.55026		2.10424	1.4709		0.34998	0.551703
691 ms	0.970677	1.28194		1.97543	1.17794		2.13462	1.27331		1.52326	1.09697			2.38577	1.66188		4.50937	1.61435		5.22408	1.6952		5.30083	1.78318			0.0611966	0.0350558		2.92353	1.55189		2.12101	1.47463		0.356435	0.562216
692 ms	0.966938	1.27752		1.96791	1.17773		2.12715	1.27343		1.51777	1.09578			2.48506	1.69386		4.51869	1.60876		5.23634	1.69106		5.33362	1.77631			0.0621244	0.0348677		2.93362	1.55307		2.13745	1.47801		0.363003	0.572593
693 ms	0.963069	1.27328		1.96056	1.17754		2.1198	1.27343		1.51236	1.09468			2.57948	1.72271		4.52703	1.60299		5.24699	1.68638		5.36223	1.76935			0.0616138	0.0345074		2.94397	1.55381		2.15415	1.4815		0.36988	0.582978
694 ms	0.959037	1.26882		1.95331	1.17748		2.1126	1.27348		1.50698	1.09344			2.6663	1.74909		4.53495	1.59754		5.2559	1.68186		5.38685	1.76227			0.0619844	0.0348549		2.95462	1.55455		2.17109	1.48438		0.376874	0.593495
695 ms	0.954914	1.26451		1.9459	1.17742		2.10545	1.27344		1.50154	1.09223			2.74826	1.77319		4.54233	1.59238		5.26383	1.677		5.40766	1.75524			0.0620075	0.0346547		2.96466	1.55547		2.18805	1.48695		0.38281	0.60377
696 ms	0.950803	1.26036		1.93867	1.17724		2.09813	1.27344		1.49611	1.09107			2.82269	1.79549		4.54831	1.58714		5.2696	1.67245		5.42488	1.74915			0.0616368	0.0337818		2.97417	1.55693		2.20595	1.48953		0.389184	0.614643
697 ms	0.946752	1.25607		1.93144	1.17718		2.09088	1.27348		1.49077	1.08999			2.89203	1.81585		4.55364	1.5825		5.27473	1.66804		5.43989	1.74336			0.0615397	0.0339364		2.98455	1.55773		2.22328	1.4921		0.395153	0.624843
698 ms	0.9426	1.25167		1.92424	1.1772		2.08371	1.27326		1.48533	1.08889			2.9552	1.83537		4.55823	1.57837		5.27861	1.6637		5.45309	1.73856			0.0607828	0.0336605		2.99407	1.55861		2.24177	1.49451		0.401802	0.635167
699 ms	0.938522	1.24721		1.91702	1.17734		2.07662	1.27313		1.48001	1.0878			3.01473	1.85395		4.56204	1.57455		5.2818	1.65976		5.46574	1.73466			0.0602856	0.034479		3.00441	1.55918		2.25998	1.4971		0.40844	0.645828
700 ms	0.934584	1.24278		1.9097	1.17759		2.06943	1.2731		1.47467	1.08664			3.06922	1.87127		4.56487	1.57115		5.28447	1.65608		5.47862	1.73226			0.0612678	0.0342238		3.01395	1.55985		2.27828	1.49991		0.415287	0.655619
701 ms	0.930773	1.23859		1.90237	1.17759		2.06216	1.27313		1.4693	1.08557			3.12089	1.88733		4.56681	1.56757		5.2866	1.65249		5.4922	1.73114			0.0616354	0.033603		3.02338	1.56114		2.29677	1.50266		0.421945	0.664962
702 ms	0.927175	1.23449		1.89539	1.1777		2.055	1.27304		1.46403	1.08448			3.16916	1.90262		4.56791	1.56419		5.28813	1.64936		5.50694	1.73138			0.0623618	0.0330517		3.03305	1.56202		2.31548	1.50557		0.429478	0.674701
703 ms	0.923651	1.23052		1.88824	1.17779		2.04822	1.273		1.45879	1.08329			3.21513	1.91729		4.56819	1.56075		5.28929	1.64645		5.52283	1.73268			0.0630068	0.0327097		3.04362	1.56248		2.33329	1.50811		0.436754	0.683722
704 ms	0.920079	1.22671		1.88126	1.17785		2.0412	1.27286		1.45346	1.08198			3.2588	1.93064		4.5678	1.55717		5.28991	1.64353		5.53921	1.73502			0.0635512	0.0319289		3.05281	1.56387		2.35104	1.51079		0.44387	0.692979
705 ms	0.917044	1.2239		1.87448	1.17797		2.03419	1.27282		1.44821	1.08074			3.30064	1.94282		4.56654	1.55336		5.28999	1.64096		5.55581	1.73795			0.0632557	0.0320174		3.06252	1.56483		2.36755	1.51303		0.450523	0.701645
706 ms	0.9137	1.22099		1.8677	1.17791		2.02719	1.27268		1.44286	1.07967			3.33932	1.95409		4.56451	1.54972		5.2891	1.63814		5.57186	1.741			0.0628595	0.0309441		3.07195	1.56654		2.38451	1.51504		0.457003	0.710996
707 ms	0.910408	1.21828		1.8611	1.17769		2.02042	1.27237		1.43757	1.07856			3.3749	1.96571		4.56186	1.54607		5.28742	1.63558		5.5865	1.74435			0.0615034	0.0309532		3.08143	1.56862		2.4011	1.51688		0.463733	0.720146
708 ms	0.906939	1.2151		1.85461	1.17763		2.01377	1.27191		1.43243	1.07739			3.40856	1.97604		4.5586	1.5425		5.28488	1.63287		5.59933	1.74742			0.060751	0.0305939		3.09103	1.5695		2.41737	1.51909		0.470955	0.729337
709 ms	0.903307	1.21211		1.84798	1.1775		2.00709	1.27157		1.42726	1.07621			3.43848	1.98523		4.55444	1.53863		5.28129	1.63002		5.60972	1.7498			0.0607272	0.0308247		3.09999	1.5717		2.43348	1.52062		0.478207	0.738298
710 ms	0.899695	1.20934		1.84164	1.17731		2.0002	1.27111		1.42214	1.07505			3.46512	1.99334		4.5499	1.53517		5.27645	1.62688		5.61721	1.75137			0.0595651	0.0311692		3.10877	1.57304		2.4496	1.52253		0.484887	0.747237
711 ms	0.89617	1.2068		1.83507	1.17731		1.99364	1.27072		1.41709	1.07409			3.48811	2.00048		4.54454	1.53189		5.27033	1.62347		5.62164	1.75222			0.0594139	0.0313226		3.1182	1.57429		2.46603	1.52432		0.492305	0.75626
712 ms	0.89203	1.20356		1.82845	1.1773		1.9871	1.2703		1.412	1.0731			3.50781	2.00611		4.53848	1.52853		5.26324	1.61989		5.6231	1.75204			0.0608171	0.0306976		3.127	1.5753		2.48268	1.5259		0.50036	0.76551
713 ms	0.88835	1.20085		1.82197	1.17736		1.98064	1.27		1.407	1.07203			3.52441	2.0103		4.53188	1.52501		5.25517	1.6162		5.62114	1.75123			0.0611631	0.0310419		3.13576	1.57602		2.4986	1.52812		0.50895	0.773632
714 ms	0.884661	1.19852		1.81548	1.17748		1.97413	1.26971		1.40195	1.07095			3.53797	2.01281		4.52472	1.52171		5.24571	1.61207		5.61643	1.74938			0.0612439	0.0308636		3.14452	1.57664		2.51468	1.52967		0.517096	0.782441
715 ms	0.880943	1.19631		1.80897	1.17734		1.9676	1.26936		1.39687	1.0699			3.54763	2.01467		4.51679	1.51856		5.23498	1.6078		5.60838	1.7465			0.0614368	0.0308689		3.15364	1.57783		2.53111	1.53144		0.524654	0.79155
716 ms	0.877609	1.1945		1.8026	1.1774		1.96112	1.26896		1.39186	1.06892			3.55533	2.0148		4.50843	1.51554		5.22324	1.60307		5.59748	1.74279			0.0615865	0.0300783		3.16331	1.57799		2.54698	1.53378		0.532433	0.800728
717 ms	0.874249	1.19224		1.7961	1.17736		1.95476	1.2686		1.38682	1.06785			3.55995	2.01352		4.49951	1.51242		5.2105	1.59807		5.58374	1.73827			0.0625005	0.0296724		3.1725	1.5789		2.56261	1.53576		0.540777	0.81033
718 ms	0.871007	1.18985		1.7898	1.17717		1.94838	1.26817		1.38184	1.06668			3.56288	2.01168		4.49022	1.50914		5.1972	1.59284		5.56789	1.73279			0.0624363	0.0292159		3.18202	1.57938		2.57812	1.53755		0.548962	0.82005
719 ms	0.867863	1.18747		1.78353	1.17674		1.942	1.26773		1.37695	1.06542			3.56348	2.00928		4.48072	1.50638		5.18296	1.58722		5.54952	1.72674			0.0618965	0.0293741		3.19192	1.58054		2.59342	1.53969		0.556966	0.829937
720 ms	0.864674	1.18476		1.77718	1.17624		1.93565	1.26714		1.37208	1.06409			3.56132	2.0057		4.47054	1.50357		5.16795	1.5813		5.52922	1.71981			0.0618434	0.0291948		3.20186	1.5817		2.60866	1.54133		0.564988	0.839848
721 ms	0.86166	1.18242		1.7709	1.17573		1.92927	1.26667		1.36724	1.06286			3.55826	2.00112		4.4601	1.50049		5.15266	1.57541		5.50712	1.71206			0.0618058	0.0285142		3.21143	1.58295		2.62371	1.54324		0.57351	0.849684
722 ms	0.858887	1.18056		1.76481	1.17548		1.92291	1.26617		1.36249	1.06159			3.55349	1.99615		4.44956	1.49763		5.13707	1.56921		5.48397	1.70424			0.0622077	0.0281758		3.22116	1.58369		2.63833	1.54451		0.582521	0.859545
723 ms	0.856137	1.17873		1.7587	1.17512		1.91658	1.26564		1.35767	1.06037			3.54609	1.99138		4.43864	1.49469		5.12093	1.56303		5.4597	1.69598			0.0614708	0.0289457		3.23066	1.58458		2.65311	1.54609		0.591453	0.869287
724 ms	0.853292	1.17719		1.75264	1.17471		1.91035	1.26506		1.353	1.05922			3.53825	1.98635		4.42728	1.49172		5.1044	1.55663		5.43474	1.68733			0.0607033	0.0289974		3.24052	1.5856		2.66799	1.54758		0.600262	0.879087
725 ms	0.850293	1.17593		1.74681	1.17424		1.90413	1.26446		1.34834	1.05807			3.52894	1.98032		4.41583	1.48871		5.08761	1.55005		5.40921	1.67862			0.0602458	0.0284639		3.25045	1.58682		2.68213	1.54904		0.608927	0.888705
726 ms	0.847208	1.17466		1.74101	1.17383		1.89815	1.26385		1.34365	1.057			3.51847	1.97406		4.40386	1.48525		5.07059	1.54364		5.38379	1.66987			0.0603719	0.0286982		3.26011	1.58788		2.69671	1.55004		0.618038	0.89837
727 ms	0.844	1.17327		1.7353	1.17354		1.89201	1.2632		1.33896	1.05602			3.5077	1.96798		4.39187	1.48174		5.05345	1.53727		5.35842	1.66118			0.0606079	0.0289722		3.26981	1.58857		2.71113	1.55129		0.627212	0.907671
728 ms	0.840708	1.1716		1.7296	1.17338		1.88594	1.26238		1.33435	1.05496			3.49503	1.96206		4.37954	1.47819		5.03422	1.53282		5.33328	1.65271			0.0618862	0.0297403		3.28029	1.58932		2.72516	1.5528		0.636518	0.91769
729 ms	0.837231	1.16956		1.72377	1.17307		1.87981	1.26162		1.32973	1.05393			3.48138	1.95536		4.36698	1.47415		5.01497	1.52941		5.30873	1.64419			0.0618089	0.0299183		3.28968	1.59108		2.73937	1.55444		0.645738	0.927799
730 ms	0.833298	1.1673		1.71802	1.17289		1.8737	1.2609		1.32506	1.05288			3.46771	1.94861		4.35427	1.46991		4.99527	1.52727		5.28471	1.63609			0.0623207	0.0294954		3.29892	1.59288		2.75329	1.55576		0.65541	0.938128
731 ms	0.829625	1.16534		1.71246	1.17274		1.8676	1.26028		1.32036	1.05177			3.4523	1.94161		4.34134	1.46559		4.97595	1.52655		5.26159	1.62843			0.0626086	0.0294345		3.30816	1.59405		2.76667	1.55719		0.665103	0.948155
732 ms	0.826219	1.16359		1.70685	1.17272		1.86136	1.25959		1.31572	1.05062			3.43584	1.9347		4.32812	1.4607		4.95626	1.52741		5.23917	1.62108			0.0631062	0.0298757		3.31736	1.59589		2.78029	1.55829		0.675817	0.958776
733 ms	0.82321	1.16202		1.70129	1.17266		1.85508	1.25892		1.3111	1.04943			3.41857	1.92717		4.31482	1.45573		4.93657	1.52937		5.21751	1.61387			0.0628056	0.0293705		3.3269	1.59717		2.7939	1.55979		0.685785	0.969483
734 ms	0.820163	1.1608		1.69572	1.17256		1.84897	1.25823		1.30653	1.04812			3.40039	1.91999		4.30146	1.45065		4.91675	1.53235		5.19693	1.60736			0.0625973	0.0280363		3.33585	1.59941		2.80754	1.56119		0.695329	0.980978
735 ms	0.817525	1.15988		1.69019	1.17247		1.84285	1.25755		1.30194	1.04698			3.38167	1.91133		4.28794	1.44503		4.89876	1.52633		5.17731	1.60133			0.0615494	0.0277367		3.34485	1.60126		2.82127	1.5625		0.705521	0.991678
736 ms	0.814965	1.15909		1.6846	1.17239		1.83692	1.25686		1.29729	1.04579			3.36243	1.9032		4.27431	1.43933		4.88045	1.52069		5.15837	1.59561			0.0617767	0.0277743		3.3545	1.60236		2.83445	1.56384		0.715928	1.00276
737 ms	0.812605	1.15839		1.67924	1.17206		1.8311	1.25612		1.29276	1.04458			3.34253	1.89469		4.26051	1.43339		4.86331	1.51091		5.14054	1.59008			0.0619861	0.0295352		3.36422	1.60329		2.84773	1.56557		0.725799	1.01335
738 ms	0.81035	1.15733		1.67387	1.1718		1.82521	1.25519		1.28825	1.04335			3.32159	1.88537		4.24674	1.427		4.84609	1.5009		5.12351	1.5854			0.0625043	0.0289156		3.37375	1.60509		2.86117	1.56724		0.736219	1.02479
739 ms	0.807917	1.15608		1.66847	1.17144		1.81946	1.25446		1.28367	1.04206			3.30014	1.87601		4.23264	1.42039		4.83098	1.48393		5.10754	1.58111			0.0628154	0.0284511		3.38327	1.60646		2.8748	1.5694		0.746594	1.0358
740 ms	0.805546	1.15507		1.66323	1.17114		1.81366	1.25357		1.27912	1.04085			3.27886	1.86633		4.21866	1.41342		4.81582	1.46948		5.09244	1.57747			0.0629429	0.0290489		3.39252	1.6085		2.88738	1.57165		0.756785	1.04648
741 ms	0.803441	1.15428		1.6581	1.17077		1.80786	1.25275		1.27459	1.03963			3.25624	1.85602		4.20444	1.40618		4.80068	1.45798		5.07812	1.57425			0.063121	0.029929		3.40178	1.6096		2.90024	1.57367		0.76775	1.05712
742 ms	0.800501	1.15278		1.653	1.17026		1.80218	1.25191		1.27012	1.03828			3.23323	1.84661		4.19003	1.39885		4.78566	1.44928		5.06493	1.57183			0.0633216	0.0297229		3.4109	1.6109		2.91251	1.57647		0.777437	1.0686
743 ms	0.798058	1.15194		1.6481	1.16975		1.79647	1.25106		1.26573	1.03695			3.21116	1.83659		4.17557	1.39123		4.77099	1.44324		5.05257	1.56991			0.0626754	0.0297965		3.41922	1.61257		2.92528	1.57914		0.787902	1.07891
744 ms	0.795807	1.15122		1.64297	1.16931		1.7908	1.25018		1.26136	1.03554			3.18861	1.82565		4.16123	1.38345		4.75535	1.4396		5.04096	1.56895			0.0623221	0.0290873		3.42802	1.61457		2.93743	1.58123		0.798647	1.08944
745 ms	0.792957	1.15036		1.63773	1.16869		1.78524	1.24948		1.25698	1.03424			3.16587	1.81554		4.14658	1.37593		4.73947	1.43719		5.03023	1.56836			0.0619099	0.0289625		3.43693	1.61564		2.94991	1.58359		0.809091	1.09972
746 ms	0.790203	1.1496		1.63264	1.16809		1.7797	1.24855		1.25268	1.03298			3.14326	1.80504		4.13205	1.36843		4.72164	1.43344		5.02018	1.56851			0.0614246	0.030011		3.44602	1.61611		2.96155	1.58635		0.819028	1.10982
747 ms	0.787084	1.14875		1.62735	1.16747		1.77417	1.24774		1.24833	1.03168			3.12028	1.79497		4.1174	1.36106		4.70407	1.43002		5.01106	1.56933			0.0620349	0.0304762		3.4545	1.61621		2.97386	1.58856		0.829928	1.12017
748 ms	0.783983	1.14772		1.62218	1.16685		1.7686	1.24686		1.24392	1.03039			3.09855	1.78541		4.10288	1.35358		4.68684	1.42721		5.00257	1.57098			0.0619521	0.0315328		3.46337	1.61691		2.98579	1.59147		0.839985	1.13
749 ms	0.781725	1.14661		1.61689	1.16622		1.76305	1.24601		1.23959	1.0291			3.07763	1.77528		4.0884	1.34635		4.66991	1.42472		4.99469	1.57299			0.0623947	0.0325061		3.47169	1.6172		2.99814	1.59393		0.850259	1.13957
750 ms	0.77876	1.14497		1.61154	1.1656		1.75762	1.24514		1.2352	1.0278			3.0559	1.76523		4.07386	1.33916		4.65304	1.4233		4.98731	1.57594			0.0619534	0.0327944		3.48069	1.61783		3.01013	1.59625		0.8597	1.14969
751 ms	0.776095	1.14374		1.60631	1.16501		1.75215	1.24412		1.23084	1.02649			3.03507	1.75609		4.05908	1.33217		4.63664	1.42223		4.98058	1.57916			0.0620864	0.0335631		3.48892	1.61793		3.02272	1.59932		0.87004	1.1597
752 ms	0.773768	1.14241		1.60122	1.16431		1.74664	1.24295		1.22649	1.02516			3.0153	1.74727		4.04437	1.32508		4.62063	1.42156		4.97433	1.58296			0.0616234	0.0342677		3.49695	1.61865		3.03468	1.60239		0.880228	1.16922
753 ms	0.771899	1.14148		1.59599	1.16364		1.74115	1.24176		1.22214	1.02368			2.99582	1.73893		4.02987	1.31841		4.60504	1.42132		4.96844	1.58737			0.062396	0.0338885		3.50456	1.61913		3.04706	1.60509		0.89027	1.17866
754 ms	0.770219	1.14018		1.59083	1.16298		1.73575	1.24051		1.21797	1.02224			2.97671	1.73132		4.01524	1.3117		4.58988	1.42168		4.96282	1.5924			0.0623267	0.0342351		3.51281	1.61947		3.05911	1.60813		0.900383	1.18789
755 ms	0.76869	1.13916		1.58572	1.16214		1.73044	1.23935		1.21387	1.02068			2.95858	1.72336		4.00032	1.30512		4.57494	1.42218		4.95766	1.59768			0.0624444	0.034913		3.52092	1.61978		3.07099	1.61093		0.910929	1.19729
756 ms	0.766688	1.13846		1.58089	1.1612		1.7251	1.23807		1.20971	1.01917			2.94004	1.71609		3.98538	1.29878		4.56008	1.42287		4.95252	1.60355			0.0624142	0.0354259		3.52918	1.62014		3.0826	1.61382		0.921752	1.20605
757 ms	0.765374	1.13788		1.57612	1.16027		1.71971	1.23686		1.20569	1.01761			2.92219	1.7095		3.97049	1.29281		4.5456	1.42354		4.94786	1.60956			0.0635806	0.0353797		3.53736	1.6197		3.09399	1.6171		0.933251	1.21407
758 ms	0.763328	1.13696		1.57133	1.15921		1.7144	1.23563		1.20164	1.01608			2.90478	1.7036		3.95591	1.28734		4.53129	1.42437		4.94337	1.6162			0.0635617	0.0348175		3.54546	1.62016		3.10481	1.61994		0.943625	1.22288
759 ms	0.761201	1.13617		1.56661	1.15833		1.70915	1.23434		1.19767	1.0146			2.88715	1.69785		3.94137	1.28192		4.5175	1.42557		4.93887	1.62315			0.0637425	0.0348414		3.55335	1.62033		3.11577	1.62242		0.954329	1.231
760 ms	0.75895	1.13512		1.56198	1.15735		1.704	1.23315		1.19369	1.01323			2.8709	1.69315		3.92681	1.27672		4.50379	1.42671		4.9347	1.63045			0.0634029	0.0342954		3.56199	1.62084		3.12653	1.62496		0.965062	1.23924
761 ms	0.756981	1.13468		1.55729	1.15627		1.69874	1.23184		1.18973	1.01184			2.85461	1.68857		3.91217	1.27181		4.49007	1.42797		4.93043	1.63769			0.0622562	0.0341464		3.57023	1.62194		3.13709	1.62744		0.97532	1.24719
762 ms	0.754404	1.13392		1.55256	1.15544		1.69358	1.23044		1.18579	1.01065			2.83852	1.68505		3.89786	1.26731		4.4767	1.42935		4.92627	1.64498			0.0625265	0.0331526		3.57841	1.62229		3.14765	1.62949		0.986006	1.25474
763 ms	0.751896	1.13324		1.54764	1.1548		1.68861	1.22927		1.18184	1.0093			2.82302	1.68193		3.88373	1.2629		4.46332	1.43105		4.92204	1.6528			0.0628408	0.0329803		3.58657	1.62301		3.15816	1.63101		0.996986	1.26205
764 ms	0.748962	1.13261		1.54275	1.15393		1.68356	1.22799		1.17778	1.00798			2.808	1.67921		3.86961	1.25891		4.45018	1.43287		4.91819	1.66063			0.0616815	0.0332501		3.5949	1.62408		3.16869	1.6324		1.00688	1.27071
765 ms	0.746866	1.13197		1.53796	1.15319		1.6785	1.22681		1.17389	1.00669			2.79308	1.6767		3.85551	1.25496		4.43693	1.4349		4.91384	1.66851			0.0612995	0.0333985		3.60336	1.62393		3.17917	1.63421		1.01771	1.27853
766 ms	0.74503	1.13151		1.53328	1.15256		1.67332	1.22563		1.17003	1.0053			2.77899	1.67527		3.84159	1.25152		4.42381	1.4369		4.90979	1.67639			0.062242	0.0339647		3.61168	1.62408		3.1896	1.635		1.02845	1.28613
767 ms	0.74317	1.13107		1.52838	1.15183		1.66821	1.22434		1.16629	1.00391			2.76473	1.67298		3.82771	1.24812		4.41088	1.43907		4.90572	1.68433			0.0618258	0.0349439		3.61912	1.6247		3.19977	1.6359		1.03952	1.29366
768 ms	0.741186	1.13023		1.52373	1.15115		1.66314	1.22326		1.16244	1.00253			2.75054	1.6717		3.81432	1.24507		4.39816	1.44146		4.90207	1.69236			0.0629134	0.0341305		3.6269	1.62501		3.20972	1.63721		1.05069	1.30154
769 ms	0.739568	1.12937		1.51907	1.15033		1.65807	1.22215		1.15869	1.00099			2.73692	1.67085		3.80092	1.24222		4.38532	1.44365		4.89839	1.70065			0.0629895	0.0342739		3.63453	1.62556		3.21982	1.63779		1.06189	1.30994
770 ms	0.738009	1.12849		1.51466	1.1494		1.65285	1.22082		1.15497	0.999515			2.72446	1.67024		3.78778	1.23967		4.37294	1.44609		4.89502	1.70861			0.0622737	0.03447		3.64208	1.62601		3.22959	1.6391		1.07276	1.3185
771 ms	0.736739	1.12751		1.51023	1.14868		1.64781	1.21947		1.15133	0.998026			2.71202	1.67051		3.77475	1.23737		4.36042	1.44857		4.89131	1.71691			0.0627697	0.0342637		3.64898	1.62661		3.23908	1.64027		1.08444	1.32634
772 ms	0.735011	1.12635		1.50593	1.14766		1.64266	1.21809		1.1476	0.996586			2.70067	1.67003		3.76174	1.23514		4.34835	1.45118		4.88817	1.72528			0.0632495	0.0339798		3.65593	1.62719		3.24852	1.64052		1.09617	1.33397
773 ms	0.733225	1.1253		1.5015	1.14662		1.63767	1.21685		1.14382	0.995004			2.68974	1.67035		3.74913	1.23313		4.33626	1.45386		4.88529	1.73358			0.0627295	0.03363		3.66311	1.62762		3.25815	1.64131		1.10778	1.34242
774 ms	0.731284	1.12419		1.49743	1.14554		1.63264	1.21555		1.14008	0.993561			2.67907	1.67153		3.73661	1.23166		4.32415	1.4566		4.88261	1.74165			0.0626519	0.0330534		3.66982	1.62837		3.26716	1.64196		1.11962	1.35056
775 ms	0.729473	1.12311		1.49323	1.14447		1.62758	1.2141		1.13644	0.992081			2.66922	1.6721		3.72414	1.23026		4.31207	1.45934		4.8798	1.74998			0.0620875	0.0333448		3.67651	1.62844		3.27639	1.64219		1.13136	1.35857
776 ms	0.727705	1.12216		1.48923	1.14331		1.62254	1.2128		1.13277	0.990724			2.65885	1.67353		3.71187	1.2294		4.30041	1.46242		4.8773	1.7582			0.0615353	0.0338228		3.68329	1.62886		3.2856	1.64243		1.14307	1.36596
777 ms	0.725769	1.12115		1.48496	1.1423		1.61745	1.21137		1.12917	0.989394			2.64869	1.67459		3.69958	1.22867		4.28853	1.4653		4.87464	1.7663			0.0618484	0.0335071		3.69014	1.62967		3.29516	1.64213		1.15457	1.3736
778 ms	0.723308	1.12028		1.48095	1.14133		1.61236	1.20996		1.12552	0.988018			2.63884	1.6757		3.68754	1.22804		4.27679	1.46839		4.87231	1.77431			0.0620447	0.0322381		3.69674	1.62999		3.30454	1.64227		1.16663	1.38067
779 ms	0.721021	1.11945		1.47671	1.14049		1.60746	1.20852		1.1219	0.986536			2.62903	1.67733		3.67575	1.22794		4.26512	1.47199		4.87011	1.78212			0.0621703	0.032194		3.70356	1.63092		3.31379	1.64198		1.17802	1.38818
780 ms	0.718644	1.11864		1.47253	1.13966		1.60274	1.20698		1.11831	0.985251			2.61981	1.6783		3.66416	1.22803		4.25346	1.4754		4.86774	1.78991			0.0619246	0.0329886		3.70967	1.6321		3.32284	1.64237		1.19024	1.39516
781 ms	0.716167	1.11772		1.46831	1.13892		1.59794	1.20551		1.11469	0.983882			2.61043	1.67963		3.65245	1.22799		4.24199	1.47926		4.86515	1.79755			0.0623185	0.0334252		3.71681	1.63256		3.33233	1.64285		1.20192	1.40216
782 ms	0.71354	1.11688		1.46407	1.13792		1.59335	1.20404		1.11106	0.982473			2.60227	1.68162		3.6409	1.2285		4.2307	1.48315		4.86326	1.80504			0.0617808	0.0333493		3.72332	1.63374		3.34154	1.64337		1.21352	1.40942
783 ms	0.711025	1.116		1.45964	1.13719		1.58871	1.2024		1.10748	0.981062			2.59422	1.68303		3.62974	1.22894		4.21928	1.48697		4.8612	1.81242			0.0618351	0.0334117		3.72939	1.6347		3.35022	1.64448		1.22528	1.41639
784 ms	0.709104	1.115		1.4554	1.13633		1.58418	1.20081		1.10395	0.979672			2.58714	1.68502		3.61876	1.22933		4.20804	1.49122		4.85933	1.81966			0.0621525	0.032635		3.73518	1.63531		3.35889	1.64522		1.23751	1.42302
785 ms	0.707689	1.11392		1.45118	1.13557		1.57962	1.19924		1.10052	0.978319			2.57957	1.68679		3.60781	1.22983		4.19681	1.49568		4.85753	1.82682			0.0623487	0.0339758		3.74117	1.63574		3.36732	1.64564		1.24888	1.43022
786 ms	0.706103	1.11264		1.44704	1.13485		1.57506	1.19765		1.09708	0.976999			2.57145	1.68865		3.59706	1.23013		4.1856	1.49986		4.85551	1.83408			0.062768	0.0351705		3.74712	1.63605		3.37613	1.6462		1.26049	1.43719
787 ms	0.704578	1.11126		1.44295	1.13393		1.57048	1.1961		1.09365	0.975661			2.5634	1.69149		3.58619	1.23074		4.17449	1.50412		4.85371	1.84112			0.0627732	0.034318		3.75295	1.63675		3.38472	1.64683		1.27169	1.444
788 ms	0.703589	1.10994		1.43883	1.13303		1.56605	1.19454		1.09025	0.974256			2.55633	1.69352		3.57582	1.23152		4.1636	1.50826		4.85231	1.84816			0.0627484	0.0340194		3.75802	1.63722		3.39331	1.64721		1.28342	1.45101
789 ms	0.702052	1.10852		1.43491	1.13236		1.56144	1.193		1.08691	0.972935			2.5483	1.69565		3.56563	1.23208		4.15255	1.51236		4.85014	1.85512			0.0638128	0.0343733		3.76306	1.63757		3.40175	1.64706		1.29576	1.45759
790 ms	0.700549	1.10715		1.43107	1.13167		1.55689	1.19152		1.08359	0.971561			2.54131	1.69738		3.55536	1.23285		4.14173	1.5168		4.84813	1.86147			0.0638222	0.0345884		3.76815	1.63784		3.41036	1.64687		1.30795	1.4649
791 ms	0.698545	1.10578		1.42716	1.13082		1.5524	1.19025		1.08026	0.970217			2.53331	1.6993		3.54518	1.23363		4.13109	1.5211		4.84627	1.86821			0.0639832	0.0357015		3.77332	1.63796		3.4186	1.6469		1.31957	1.47218
792 ms	0.696402	1.1046		1.42321	1.12989		1.5479	1.18882		1.07696	0.968836			2.52685	1.70126		3.53536	1.23445		4.12058	1.52524		4.84424	1.87449			0.0644046	0.0354187		3.7783	1.63832		3.42691	1.6473		1.33204	1.47904
793 ms	0.694413	1.1037		1.41933	1.12897		1.54336	1.18751		1.07383	0.967589			2.52057	1.70389		3.52561	1.23554		4.11016	1.52946		4.84229	1.88053			0.0641558	0.0352975		3.78283	1.63912		3.43483	1.64799		1.34471	1.48585
794 ms	0.692717	1.10289		1.41546	1.12819		1.5388	1.18616		1.07074	0.966292			2.51546	1.70533		3.51603	1.23613		4.09992	1.53398		4.84052	1.88675			0.0644244	0.0363829		3.78752	1.63909		3.44264	1.64857		1.3574	1.4924
795 ms	0.690764	1.10216		1.41169	1.12741		1.53423	1.18476		1.06773	0.965097			2.50951	1.70753		3.50641	1.23686		4.08979	1.53847		4.83848	1.89275			0.0646112	0.0364027		3.79187	1.63976		3.45043	1.64936		1.36934	1.49888
796 ms	0.689267	1.10165		1.40787	1.12663		1.52979	1.18337		1.06467	0.963844			2.50454	1.70887		3.497	1.23751		4.07984	1.54285		4.83662	1.89861			0.0638869	0.0361244		3.79669	1.63997		3.45822	1.65058		1.38109	1.50517
797 ms	0.687897	1.10126		1.40418	1.12581		1.52551	1.18199		1.06161	0.962594			2.49982	1.71098		3.48764	1.23813		4.06973	1.54732		4.83484	1.90458			0.0639372	0.0351315		3.80118	1.64065		3.46603	1.6511		1.39275	1.51122
798 ms	0.686506	1.10098		1.40043	1.12513		1.52121	1.18049		1.05851	0.961326			2.49548	1.71299		3.47858	1.23899		4.05953	1.55174		4.83306	1.91037			0.0637001	0.0342077		3.8052	1.64089		3.47363	1.65218		1.40515	1.51715
799 ms	0.684962	1.10025		1.39667	1.12442		1.51704	1.17906		1.05539	0.960238			2.49045	1.71538		3.46942	1.23999		4.04962	1.55604		4.83156	1.91616			0.0624472	0.0343544		3.80914	1.6421		3.48151	1.65251		1.41676	1.52322
800 ms	0.68344	1.09951		1.39285	1.12381		1.5129	1.17755		1.05218	0.958963			2.48664	1.71724		3.46045	1.24049		4.03963	1.56029		4.83007	1.92202			0.06254	0.0338578		3.81322	1.64242		3.48928	1.65326		1.42824	1.52826
801 ms	0.682332	1.09886		1.38908	1.123		1.5087	1.17611		1.04912	0.957808			2.48189	1.71945		3.4514	1.24139		4.0298	1.56447		4.82841	1.92748			0.0625246	0.0338075		3.81708	1.64281		3.49702	1.65336		1.4395	1.53437
802 ms	0.680661	1.09815		1.38553	1.12225		1.5045	1.17467		1.04591	0.956468			2.47819	1.72134		3.44271	1.24219		4.02004	1.56898		4.8267	1.93293			0.0625359	0.0326837		3.82143	1.64309		3.5045	1.65367		1.45117	1.53972
803 ms	0.679504	1.09756		1.38202	1.12144		1.50039	1.17328		1.04282	0.955069			2.47474	1.7235		3.43386	1.24305		4.01058	1.57321		4.82516	1.93828			0.0629774	0.0331722		3.82487	1.6437		3.51203	1.65333		1.4625	1.54512
804 ms	0.678106	1.09702		1.37843	1.12066		1.49621	1.17184		1.03971	0.953741			2.47043	1.72537		3.42509	1.24392		4.00138	1.57742		4.82383	1.94382			0.0635247	0.0338356		3.82863	1.64348		3.51901	1.65386		1.47406	1.55027
805 ms	0.676806	1.09638		1.37508	1.11986		1.49208	1.17037		1.03669	0.952375			2.46679	1.72781		3.41649	1.24478		3.99234	1.58159		4.82262	1.94903			0.0637434	0.0339607		3.83211	1.6439		3.52631	1.65359		1.48558	1.55512
806 ms	0.676156	1.09589		1.37165	1.11895		1.48797	1.16904		1.03383	0.951021			2.46375	1.7295		3.40774	1.24554		3.98323	1.58593		4.82125	1.95436			0.0647806	0.03369		3.8361	1.64388		3.53301	1.6538		1.49748	1.56002
807 ms	0.67523	1.09518		1.36831	1.11792		1.48391	1.16775		1.03101	0.949707			2.46078	1.73167		3.39911	1.24667		3.97434	1.59024		4.82006	1.95943			0.0641976	0.0342195		3.83947	1.64404		3.53979	1.65355		1.50873	1.56543
808 ms	0.673318	1.09412		1.36508	1.1169		1.47996	1.16637		1.0281	0.948408			2.45815	1.73339		3.39066	1.24762		3.96553	1.59442		4.81871	1.96462			0.0641045	0.0340429		3.84288	1.64417		3.54655	1.65388		1.52041	1.56991
809 ms	0.671741	1.09298		1.36168	1.11597		1.47602	1.16506		1.02527	0.947211			2.45514	1.73582		3.38195	1.24868		3.95655	1.59845		4.81746	1.96976			0.0637477	0.0345354		3.84613	1.64427		3.55369	1.65394		1.53216	1.57512
810 ms	0.669932	1.09192		1.35832	1.11504		1.47204	1.16374		1.02238	0.946159			2.45227	1.73805		3.37347	1.24971		3.94743	1.60281		4.81649	1.97494			0.0634317	0.0345789		3.84968	1.64442		3.56077	1.65438		1.5442	1.57989
811 ms	0.668101	1.09097		1.35484	1.11418		1.46813	1.16243		1.01952	0.945009			2.45016	1.74084		3.36506	1.2506		3.93853	1.60692		4.81523	1.98003			0.0638736	0.0348635		3.85288	1.64481		3.56805	1.65402		1.55586	1.58458
812 ms	0.666264	1.09008		1.3513	1.11326		1.46421	1.16124		1.01663	0.943885			2.44753	1.74281		3.35651	1.25143		3.92971	1.61098		4.81375	1.98511			0.0633908	0.0355077		3.85672	1.64505		3.57518	1.65416		1.56693	1.58978
813 ms	0.664012	1.08941		1.34792	1.11241		1.46021	1.15989		1.01365	0.942693			2.44556	1.74496		3.34829	1.25228		3.92083	1.61505		4.81254	1.98999			0.0640961	0.0362569		3.86024	1.64452		3.58302	1.65395		1.57804	1.59429
814 ms	0.662217	1.08874		1.34447	1.11154		1.45627	1.1586		1.01065	0.941547			2.44268	1.74749		3.33987	1.25334		3.91229	1.61913		4.81144	1.99512			0.0644753	0.0367775		3.86401	1.64388		3.59046	1.65357		1.58951	1.59907
815 ms	0.661188	1.0884		1.34097	1.11079		1.45236	1.15747		1.00781	0.940359			2.44027	1.74948		3.33153	1.25432		3.90369	1.62319		4.8101	1.99999			0.0646667	0.0369778		3.86816	1.64364		3.59797	1.65305		1.60033	1.60392
816 ms	0.659713	1.08762		1.33743	1.10986		1.44848	1.15635		1.00496	0.939249			2.43882	1.75121		3.32332	1.25525		3.89538	1.62712		4.80924	2.00476			0.0643607	0.0375303		3.87181	1.64307		3.60482	1.65277		1.61057	1.60834
817 ms	0.658579	1.08646		1.33386	1.10913		1.44474	1.15519		1.00216	0.938038			2.43698	1.75364		3.31484	1.25635		3.88722	1.63108		4.80814	2.00947			0.0655403	0.0380876		3.8759	1.64265		3.61187	1.65235		1.62178	1.61284
818 ms	0.657679	1.08494		1.33044	1.10832		1.44094	1.15397		0.999369	0.936851			2.43567	1.75559		3.30653	1.25724		3.87862	1.63519		4.80717	2.01418			0.0652173	0.0367794		3.88022	1.64281		3.61923	1.65241		1.63269	1.61711
819 ms	0.656988	1.0836		1.32714	1.10757		1.43727	1.15278		0.996663	0.93559			2.43411	1.75784		3.29834	1.2583		3.87019	1.63917		4.80643	2.01886			0.065506	0.0364683		3.88441	1.64263		3.62651	1.65198		1.64364	1.62136
820 ms	0.656596	1.0825		1.32371	1.10685		1.43365	1.15159		0.993979	0.934355			2.43159	1.75992		3.29002	1.2595		3.86186	1.64304		4.80545	2.02389			0.0644572	0.0361112		3.88836	1.64293		3.63317	1.65171		1.6542	1.62564
821 ms	0.656069	1.08181		1.32056	1.10611		1.4301	1.1504		0.991369	0.933129			2.4297	1.76131		3.28194	1.2603		3.85339	1.64707		4.80441	2.02868			0.0647015	0.0353153		3.89222	1.64347		3.64022	1.65165		1.66485	1.62905
822 ms	0.655163	1.08076		1.31734	1.10531		1.42658	1.1491		0.988606	0.931863			2.42782	1.76386		3.27364	1.2612		3.84494	1.65099		4.80358	2.03367			0.0648912	0.0358023		3.8961	1.64353		3.6471	1.65132		1.67571	1.63289
823 ms	0.654634	1.0804		1.31416	1.10472		1.42311	1.1479		0.985914	0.930536			2.42528	1.76625		3.26548	1.26208		3.83619	1.6548		4.8025	2.0386			0.0660596	0.0358292		3.90013	1.64376		3.65458	1.65023		1.68713	1.6361
824 ms	0.653399	1.07981		1.31103	1.10386		1.41956	1.1467		0.983198	0.929327			2.42326	1.76802		3.2575	1.26301		3.82756	1.65883		4.80148	2.04347			0.0658226	0.0360309		3.90392	1.64386		3.66142	1.64959		1.69714	1.63938
825 ms	0.652604	1.0796		1.30801	1.10304		1.41597	1.14551		0.980641	0.928233			2.42049	1.77		3.24951	1.26406		3.81919	1.66246		4.80027	2.04824			0.0656698	0.0372857		3.90767	1.64344		3.66778	1.64928		1.7075	1.64313
826 ms	0.651496	1.07902		1.30498	1.10237		1.41237	1.14428		0.97802	0.927185			2.41835	1.77165		3.24134	1.26505		3.81053	1.66644		4.79903	2.05293			0.0663294	0.03821		3.91155	1.64352		3.6745	1.64843		1.71799	1.6462
827 ms	0.650212	1.07823		1.30215	1.10167		1.40879	1.14305		0.975453	0.926057			2.41653	1.774		3.23333	1.26586		3.80235	1.67041		4.79778	2.05742			0.0666311	0.0381893		3.91572	1.64346		3.68156	1.64791		1.72825	1.64932
828 ms	0.648902	1.07714		1.29913	1.10104		1.40516	1.1418		0.972861	0.924951			2.41458	1.77561		3.22529	1.2667		3.79404	1.67446		4.79649	2.06183			0.067183	0.0381954		3.91961	1.64364		3.68836	1.64692		1.73884	1.6525
829 ms	0.647437	1.07641		1.29611	1.10047		1.4015	1.14048		0.970386	0.923883			2.41192	1.77729		3.21746	1.26757		3.78582	1.67851		4.79534	2.0663			0.0668048	0.0380363		3.92364	1.64397		3.69532	1.64624		1.74903	1.65599
830 ms	0.646557	1.07528		1.29315	1.09983		1.39787	1.1392		0.967941	0.92289			2.40978	1.77854		3.2096	1.26826		3.77783	1.68262		4.79408	2.07077			0.0667178	0.0372597		3.92781	1.64452		3.70208	1.64586		1.75988	1.65953
831 ms	0.645999	1.07463		1.29036	1.09933		1.39427	1.13789		0.965503	0.921814			2.40745	1.78016		3.20159	1.26899		3.76977	1.68639		4.79274	2.07556			0.066417	0.0366151		3.9322	1.6444		3.70892	1.64575		1.7701	1.66291
832 ms	0.644936	1.07346		1.28745	1.09871		1.3907	1.13671		0.962998	0.920697			2.40526	1.78143		3.19375	1.26972		3.76174	1.69037		4.79155	2.0802			0.0667429	0.0359787		3.93633	1.64465		3.71627	1.64544		1.78108	1.66592
833 ms	0.644341	1.07282		1.28467	1.09804		1.38723	1.13552		0.960535	0.919561			2.40306	1.7833		3.18601	1.2704		3.75388	1.69451		4.79004	2.08484			0.0668133	0.0360782		3.94037	1.64427		3.72366	1.6452		1.79196	1.66906
834 ms	0.643772	1.07188		1.28169	1.09741		1.38375	1.13436		0.958105	0.918485			2.40105	1.78423		3.17824	1.27109		3.74551	1.69856		4.78858	2.08942			0.0671847	0.0361132		3.94396	1.64431		3.73051	1.64449		1.80296	1.67248
835 ms	0.642952	1.071		1.27877	1.09678		1.38031	1.13317		0.955588	0.917378			2.39909	1.78675		3.17028	1.27199		3.7374	1.70224		4.78728	2.09404			0.0669955	0.0361355		3.94802	1.64356		3.73799	1.64414		1.81392	1.67606
836 ms	0.642764	1.06964		1.27597	1.09617		1.37691	1.13191		0.953081	0.916213			2.39754	1.78801		3.16253	1.27272		3.72917	1.7062		4.78578	2.09857			0.0676069	0.0364667		3.95162	1.64333		3.74526	1.6438		1.82502	1.67919
837 ms	0.642359	1.06851		1.27307	1.0957		1.37352	1.13061		0.950655	0.915124			2.39446	1.79006		3.1546	1.27362		3.7207	1.71008		4.78407	2.10344			0.0673571	0.037039		3.9553	1.64252		3.75277	1.64315		1.8353	1.68287
838 ms	0.641934	1.0669		1.27012	1.09505		1.37014	1.12952		0.948298	0.914095			2.392	1.79141		3.14684	1.27393		3.71221	1.71405		4.78233	2.1078			0.0675869	0.038103		3.9586	1.64255		3.76041	1.64271		1.84673	1.68612
839 ms	0.641719	1.06586		1.26696	1.09448		1.36683	1.12837		0.945933	0.913033			2.38977	1.79281		3.13896	1.27447		3.70385	1.71797		4.78049	2.11219			0.0677337	0.0382968		3.96196	1.6425		3.76772	1.64142		1.85708	1.68928
840 ms	0.641124	1.06446		1.26383	1.09379		1.36342	1.12725		0.943639	0.912172			2.38673	1.79375		3.13104	1.27488		3.69538	1.72148		4.77882	2.11662			0.066769	0.0379365		3.96527	1.64254		3.77464	1.64042		1.86744	1.6925
841 ms	0.640583	1.06362		1.26076	1.09319		1.36001	1.12611		0.941311	0.91117			2.38391	1.79515		3.12304	1.27521		3.68702	1.72508		4.77691	2.12096			0.0667964	0.0378528		3.96854	1.64245		3.78205	1.6398		1.87847	1.69522
842 ms	0.640385	1.0626		1.25776	1.09254		1.35663	1.12503		0.939114	0.910203			2.38048	1.7958		3.11509	1.27544		3.67863	1.72891		4.77467	2.12537			0.0668208	0.038265		3.97173	1.64269		3.78879	1.63954		1.88876	1.6981
843 ms	0.639873	1.0622		1.25488	1.09195		1.35322	1.12401		0.936953	0.909276			2.37761	1.79659		3.10718	1.27562		3.6701	1.73266		4.77264	2.12962			0.0669117	0.0382005		3.97489	1.64256		3.79548	1.63897		1.89951	1.7005
844 ms	0.63924	1.06167		1.25209	1.0913		1.34991	1.12294		0.934745	0.908264			2.37536	1.79726		3.09899	1.27581		3.66213	1.73623		4.77065	2.13374			0.0671217	0.0374753		3.97794	1.64292		3.80224	1.63841		1.91005	1.7029
845 ms	0.638191	1.06139		1.24924	1.09067		1.34668	1.12182		0.932514	0.907295			2.37279	1.79851		3.09112	1.27615		3.65387	1.73981		4.76864	2.1382			0.0668521	0.037522		3.98072	1.64265		3.8089	1.63738		1.921	1.70515
846 ms	0.637035	1.06044		1.24661	1.09001		1.34341	1.12069		0.930314	0.906375			2.36912	1.79983		3.083	1.27644		3.64553	1.74347		4.76673	2.14271			0.0672221	0.037572		3.98369	1.64215		3.81555	1.63696		1.9322	1.70714
847 ms	0.636085	1.05952		1.24382	1.08942		1.3401	1.11958		0.928076	0.905248			2.36677	1.80056		3.07509	1.27663		3.63735	1.74691		4.76478	2.14682			0.0675584	0.0372297		3.98653	1.64165		3.82258	1.63643		1.94337	1.70958
848 ms	0.635259	1.05848		1.24106	1.08879		1.33687	1.11864		0.925888	0.904311			2.36361	1.80143		3.06711	1.27692		3.62918	1.75062		4.76283	2.15129			0.0672228	0.0364975		3.98917	1.64134		3.82889	1.63586		1.95453	1.7122
849 ms	0.63418	1.05753		1.2383	1.08831		1.33366	1.11767		0.923651	0.903313			2.36096	1.80217		3.05918	1.27697		3.62082	1.75422		4.761	2.15573			0.0667589	0.0366991		3.99176	1.6406		3.83575	1.63544		1.96582	1.71446
850 ms	0.633158	1.05684		1.23522	1.08769		1.3305	1.11673		0.921368	0.902385			2.35738	1.80273		3.05104	1.27729		3.61272	1.75757		4.75915	2.16001			0.0668718	0.0367854		3.9944	1.64013		3.84294	1.63498		1.97691	1.71685
851 ms	0.632288	1.05615		1.23227	1.08703		1.32737	1.11586		0.919127	0.901357			2.35355	1.80353		3.04336	1.27755		3.60408	1.76123		4.75704	2.16432			0.0671532	0.0381723		3.9969	1.63939		3.84965	1.63498		1.98798	1.71894
852 ms	0.632064	1.05563		1.22955	1.08669		1.32415	1.11492		0.916942	0.900356			2.3488	1.80441		3.03529	1.27769		3.59587	1.76478		4.75481	2.1684			0.0668338	0.0383179		3.99982	1.63901		3.85675	1.63481		1.99805	1.72133
853 ms	0.63192	1.05549		1.22684	1.08632		1.32103	1.11394		0.914733	0.899293			2.3453	1.80526		3.02734	1.27781		3.58777	1.7682		4.75243	2.1728			0.0662342	0.0387265		4.00287	1.63873		3.8634	1.63411		2.0083	1.72397
854 ms	0.63197	1.05561		1.2242	1.08599		1.31792	1.11285		0.91256	0.898402			2.34147	1.8065		3.01927	1.27817		3.5796	1.77187		4.75026	2.17744			0.066617	0.0386811		4.00567	1.63895		3.87025	1.63463		2.01884	1.72565
855 ms	0.631604	1.0553		1.22159	1.08551		1.31485	1.11173		0.910344	0.897434			2.33744	1.80704		3.01127	1.27832		3.57128	1.77522		4.74812	2.18174			0.0667888	0.0392368		4.00829	1.63882		3.87707	1.63474		2.0289	1.72692
856 ms	0.631564	1.05474		1.21922	1.08481		1.31183	1.11065		0.908212	0.896557			2.33293	1.80815		3.00341	1.27852		3.56297	1.77825		4.7459	2.18592			0.0670879	0.0389645		4.01163	1.63889		3.88374	1.63455		2.03952	1.72824
857 ms	0.63145	1.05364		1.21697	1.08448		1.30883	1.10969		0.9062	0.895637			2.32882	1.80945		2.99541	1.27864		3.55456	1.78173		4.74335	2.19021			0.0668138	0.0395992		4.0146	1.63857		3.88969	1.63467		2.04985	1.72954
858 ms	0.631382	1.05306		1.21472	1.08407		1.3058	1.1087		0.9042	0.894843			2.32464	1.81042		2.98743	1.27858		3.54652	1.78473		4.74107	2.19445			0.0660068	0.0388583		4.01772	1.63848		3.89583	1.6342		2.0607	1.73069
859 ms	0.630733	1.05248		1.21237	1.08353		1.30279	1.10758		0.902157	0.894013			2.32076	1.81123		2.9796	1.27877		3.53837	1.78788		4.73869	2.19848			0.0668248	0.0389696		4.02097	1.63852		3.90172	1.63388		2.07232	1.73141
860 ms	0.630043	1.05227		1.20986	1.08315		1.29975	1.1065		0.900118	0.893272			2.31662	1.8121		2.97156	1.27909		3.52984	1.79127		4.73651	2.20236			0.0676792	0.0375696		4.02367	1.63833		3.90814	1.63399		2.08403	1.73211
861 ms	0.629011	1.05154		1.20737	1.08262		1.29678	1.10547		0.898152	0.892542			2.31152	1.81328		2.96386	1.27895		3.52158	1.79463		4.73388	2.20618			0.0677299	0.0383258		4.02696	1.63788		3.91397	1.6335		2.09496	1.7331
862 ms	0.628275	1.05148		1.20483	1.08222		1.29394	1.10451		0.896129	0.891817			2.30677	1.81522		2.9562	1.27914		3.51336	1.79792		4.73132	2.21023			0.0681258	0.0378846		4.03058	1.63727		3.92004	1.63328		2.10666	1.7334
863 ms	0.6274	1.05151		1.20207	1.08206		1.29098	1.10357		0.894096	0.891098			2.30289	1.81656		2.94826	1.27911		3.50525	1.80132		4.72889	2.21424			0.067648	0.0382021		4.0337	1.63759		3.92536	1.63256		2.11759	1.73385
864 ms	0.626412	1.0519		1.1995	1.08168		1.2879	1.10253		0.891978	0.890449			2.29801	1.81795		2.94062	1.2792		3.49723	1.80429		4.7265	2.21844			0.0686313	0.0371492		4.03716	1.63766		3.93141	1.63155		2.12962	1.73363
865 ms	0.625147	1.05145		1.19681	1.08123		1.28488	1.10151		0.889853	0.889751			2.29423	1.81924		2.93308	1.27921		3.48885	1.80783		4.72424	2.22235			0.0696647	0.0373094		4.04001	1.63783		3.93711	1.63063		2.14152	1.73318
866 ms	0.624001	1.05067		1.19409	1.0808		1.28194	1.10056		0.887744	0.889038			2.29026	1.82032		2.92537	1.27935		3.48066	1.81106		4.72175	2.22636			0.0694887	0.0373082		4.04269	1.63814		3.94251	1.63016		2.15329	1.73318
867 ms	0.623194	1.0496		1.19151	1.08037		1.27903	1.09965		0.885685	0.888305			2.28605	1.82182		2.91772	1.27916		3.47279	1.81425		4.71924	2.23024			0.0687659	0.0390368		4.04606	1.63791		3.94767	1.62978		2.1649	1.73304
868 ms	0.622436	1.04916		1.18886	1.07997		1.2761	1.0988		0.883551	0.887391			2.28236	1.82345		2.90991	1.27932		3.46454	1.8175		4.71711	2.2342			0.0690198	0.0396809		4.04905	1.63795		3.95253	1.6287		2.17713	1.73217
869 ms	0.621552	1.0484		1.18637	1.07963		1.2731	1.09796		0.88155	0.886693			2.2789	1.82392		2.90217	1.27917		3.45649	1.82039		4.71453	2.23816			0.0689886	0.0400366		4.05238	1.63835		3.95749	1.62758		2.18901	1.73193
870 ms	0.620882	1.048		1.18395	1.07929		1.27028	1.09716		0.879574	0.885966			2.27502	1.8253		2.8945	1.2795		3.44851	1.82344		4.71201	2.24193			0.0695556	0.0400104		4.0557	1.63808		3.96221	1.62686		2.20107	1.73174
871 ms	0.620407	1.047		1.18145	1.07898		1.26757	1.09639		0.877652	0.885241			2.27213	1.82659		2.88683	1.27966		3.44042	1.82677		4.7095	2.24546			0.0694248	0.040116		4.05915	1.63815		3.96659	1.6259		2.21285	1.73157
872 ms	0.620088	1.04658		1.179	1.07874		1.26474	1.09565		0.875693	0.884504			2.26845	1.82805		2.87921	1.27983		3.43269	1.82971		4.707	2.24909			0.0696771	0.039938		4.06276	1.63833		3.97111	1.62538		2.22472	1.73117
873 ms	0.619841	1.0461		1.17658	1.07828		1.2619	1.09495		0.873753	0.883753			2.26519	1.82925		2.87169	1.27991		3.42461	1.83283		4.70469	2.25266			0.0704349	0.0396712		4.06617	1.63848		3.97528	1.62458		2.23642	1.73075
874 ms	0.61922	1.0458		1.17439	1.07786		1.25916	1.09436		0.871871	0.883146			2.2616	1.83017		2.86425	1.28002		3.41654	1.8358		4.70195	2.25636			0.0705501	0.0391632		4.06958	1.6392		3.97921	1.62324		2.24804	1.73044
875 ms	0.618447	1.04469		1.17225	1.0776		1.2565	1.09369		0.870011	0.882673			2.25842	1.83068		2.85686	1.28016		3.40866	1.83876		4.69925	2.25999			0.0704663	0.0393677		4.07236	1.63972		3.98352	1.62242		2.26056	1.73025
876 ms	0.617714	1.04365		1.16998	1.07716		1.25373	1.09294		0.868115	0.882076			2.25496	1.83259		2.8494	1.28047		3.40094	1.84199		4.69691	2.26329			0.0709212	0.0396659		4.07516	1.64015		3.98768	1.62169		2.27294	1.73019
877 ms	0.616774	1.04224		1.16763	1.07672		1.25093	1.092		0.866225	0.881491			2.25139	1.83329		2.84193	1.28046		3.39293	1.84519		4.69408	2.26684			0.0710197	0.0402916		4.07756	1.64036		3.99188	1.62032		2.28587	1.72969
878 ms	0.615853	1.04173		1.1654	1.07648		1.24816	1.09115		0.864289	0.880896			2.24785	1.83479		2.83436	1.28036		3.38485	1.84825		4.69146	2.27021			0.0713966	0.0408436		4.08009	1.64073		3.99605	1.61897		2.29881	1.72926
879 ms	0.614676	1.04091		1.16303	1.07612		1.24554	1.09029		0.862406	0.880458			2.24521	1.83601		2.82682	1.28025		3.37689	1.85118		4.68868	2.27355			0.0709992	0.0410101		4.08213	1.64154		3.99991	1.61801		2.31182	1.72911
880 ms	0.613489	1.04062		1.1608	1.07601		1.24284	1.08936		0.860515	0.880001			2.24246	1.83775		2.81939	1.28035		3.36922	1.85411		4.68589	2.2771			0.0707068	0.0417605		4.0846	1.64171		4.00442	1.6162		2.32513	1.72832
881 ms	0.612512	1.03999		1.15839	1.07584		1.24013	1.08844		0.858612	0.879333			2.23942	1.83948		2.81225	1.28057		3.36146	1.85689		4.6832	2.28042			0.0712395	0.0419748		4.08626	1.64237		4.00863	1.61521		2.33881	1.727
882 ms	0.611678	1.04004		1.15613	1.07561		1.23737	1.08763		0.856717	0.878645			2.23636	1.84147		2.80457	1.28084		3.35381	1.85949		4.68045	2.28376			0.0717306	0.0427151		4.08946	1.64277		4.01255	1.61409		2.35198	1.72674
883 ms	0.610778	1.03975		1.15385	1.07554		1.2346	1.08688		0.854846	0.877937			2.23391	1.84264		2.79698	1.28099		3.3459	1.86245		4.67759	2.28692			0.0718349	0.0428808		4.09146	1.64331		4.0166	1.6125		2.36573	1.72587
884 ms	0.609833	1.03967		1.15157	1.0753		1.23182	1.0863		0.85296	0.877184			2.23091	1.84431		2.78978	1.28113		3.33823	1.8652		4.6747	2.29023			0.0717136	0.0427373		4.09378	1.64399		4.02077	1.61167		2.37973	1.72501
885 ms	0.608876	1.03878		1.14917	1.07484		1.22902	1.08563		0.851113	0.87649			2.2279	1.84602		2.78259	1.28134		3.33063	1.86771		4.67169	2.29358			0.0709133	0.0437148		4.09569	1.64438		4.02474	1.61149		2.39317	1.72476
886 ms	0.608286	1.03799		1.14715	1.07451		1.22612	1.08495		0.849279	0.87571			2.22439	1.84782		2.77528	1.28184		3.32311	1.87038		4.66878	2.29701			0.0712692	0.0446386		4.09845	1.64378		4.02848	1.61051		2.40675	1.7241
887 ms	0.60794	1.03705		1.14488	1.0742		1.22328	1.08439		0.847478	0.874986			2.22052	1.8495		2.76771	1.28214		3.31511	1.87303		4.66572	2.30013			0.0721729	0.0453422		4.10027	1.64318		4.03214	1.60978		2.42098	1.72337
888 ms	0.607529	1.03653		1.14272	1.07385		1.22034	1.08372		0.845645	0.874263			2.21766	1.85128		2.76022	1.28194		3.30732	1.87573		4.66266	2.30333			0.0725023	0.0461781		4.10253	1.64272		4.03592	1.60929		2.43548	1.72295
889 ms	0.607022	1.03598		1.14041	1.07346		1.21759	1.08299		0.843932	0.873701			2.21441	1.85241		2.75327	1.28197		3.29946	1.87865		4.65945	2.30642			0.0725145	0.0461936		4.10367	1.64281		4.03983	1.60867		2.44964	1.7221
890 ms	0.606693	1.03591		1.13827	1.07298		1.21487	1.0822		0.842175	0.87305			2.2111	1.85463		2.74647	1.28187		3.29155	1.88108		4.65619	2.30956			0.0728941	0.0477621		4.10572	1.64199		4.04319	1.60828		2.46353	1.72227
891 ms	0.606458	1.03572		1.1361	1.07258		1.21218	1.0814		0.840429	0.872352			2.20834	1.85576		2.73946	1.28199		3.28403	1.88335		4.65324	2.31244			0.0738997	0.0490966		4.10774	1.64155		4.0472	1.60741		2.47761	1.72203
892 ms	0.606243	1.03615		1.1341	1.07213		1.20955	1.08061		0.838749	0.87152			2.20536	1.85684		2.73254	1.2821		3.2765	1.88558		4.64997	2.3153			0.0749277	0.0503782		4.1096	1.64162		4.05093	1.606		2.49206	1.72125
893 ms	0.605484	1.03637		1.13192	1.07169		1.20702	1.07983		0.836999	0.870729			2.20221	1.8584		2.72545	1.28221		3.26864	1.88789		4.64678	2.31807			0.0753426	0.0516099		4.11133	1.64148		4.05524	1.60455		2.50622	1.72111
894 ms	0.604641	1.03693		1.12984	1.0711		1.20444	1.07901		0.835282	0.870015			2.19928	1.85965		2.71863	1.28231		3.261	1.89026		4.64376	2.32092			0.0754537	0.052659		4.11337	1.64214		4.05865	1.60375		2.51994	1.72099
895 ms	0.603497	1.03679		1.12767	1.07039		1.20204	1.07815		0.833552	0.869337			2.19635	1.8605		2.7117	1.28266		3.25321	1.89246		4.64075	2.32358			0.0758368	0.054323		4.11513	1.6423		4.06249	1.60231		2.53348	1.72068
896 ms	0.602531	1.03647		1.12567	1.06967		1.19947	1.07745		0.831743	0.868528			2.19389	1.8622		2.70451	1.28288		3.24556	1.89411		4.63753	2.32625			0.0766026	0.0558016		4.117	1.64146		4.06606	1.60088		2.54687	1.72029
897 ms	0.601464	1.03635		1.12361	1.06924		1.19693	1.0767		0.829981	0.867793			2.19111	1.86279		2.69731	1.283		3.23819	1.89615		4.63452	2.32898			0.0776299	0.0567791		4.11886	1.6416		4.06979	1.59966		2.56024	1.71905
898 ms	0.600287	1.03639		1.12164	1.0688		1.1944	1.07597		0.828198	0.867156			2.18853	1.86468		2.6901	1.28322		3.23041	1.89834		4.6315	2.33156			0.0780084	0.0565753		4.12006	1.64189		4.0729	1.59831		2.57307	1.71832
899 ms	0.599116	1.03661		1.11951	1.06839		1.19175	1.07526		0.826296	0.866582			2.18553	1.86661		2.68285	1.28338		3.22261	1.90064		4.62829	2.33428			0.0787849	0.0571395		4.12175	1.64198		4.0763	1.59788		2.58573	1.71741
900 ms	0.598449	1.037		1.1174	1.06794		1.18912	1.0746		0.824506	0.866038			2.18279	1.86742		2.67588	1.28348		3.2148	1.90267		4.62486	2.33722			0.0790789	0.0581698		4.12319	1.64237		4.07936	1.59736		2.59844	1.71644
901 ms	0.597851	1.03706		1.11525	1.0677		1.18652	1.07393		0.822704	0.865367			2.18014	1.86825		2.66911	1.28346		3.20716	1.90469		4.62144	2.33988			0.0792534	0.059129		4.12441	1.64203		4.08306	1.59639		2.61061	1.71597
902 ms	0.59746	1.03761		1.1132	1.06744		1.18391	1.07337		0.820877	0.864634			2.1774	1.86917		2.66225	1.28353		3.19968	1.90693		4.61819	2.34247			0.0797655	0.0598386		4.12598	1.64181		4.08609	1.59538		2.62215	1.71562
903 ms	0.596927	1.03808		1.11106	1.06714		1.18134	1.07275		0.819099	0.863846			2.1741	1.8697		2.65538	1.28335		3.1922	1.90923		4.61487	2.34506			0.0808061	0.0619207		4.12762	1.64249		4.0891	1.59446		2.63482	1.7144
904 ms	0.596613	1.03815		1.10883	1.0667		1.17872	1.07214		0.817359	0.863083			2.17118	1.87075		2.64858	1.28345		3.18454	1.91125		4.61148	2.34766			0.0810595	0.0627807		4.12889	1.64314		4.09243	1.59344		2.64645	1.71368
905 ms	0.596408	1.03778		1.10663	1.06627		1.17604	1.07151		0.81567	0.862315			2.16786	1.87152		2.64196	1.28351		3.17694	1.91335		4.60817	2.35043			0.0818107	0.0648157		4.13075	1.64316		4.09571	1.59292		2.65818	1.71314
906 ms	0.596032	1.03699		1.10428	1.06577		1.17353	1.0709		0.814058	0.861533			2.16469	1.87213		2.63535	1.28348		3.16947	1.91535		4.6048	2.35289			0.0816864	0.066278		4.13208	1.64349		4.09868	1.59189		2.66951	1.71284
907 ms	0.595539	1.03647		1.10215	1.06524		1.17095	1.07017		0.812411	0.860607			2.16151	1.87274		2.62857	1.28337		3.16229	1.91752		4.60174	2.35503			0.0833658	0.0680144		4.13317	1.6438		4.10187	1.59116		2.68133	1.71202
908 ms	0.59492	1.0361		1.10008	1.06475		1.16847	1.06959		0.810824	0.859848			2.15806	1.87343		2.62165	1.28334		3.15501	1.91935		4.59847	2.35745			0.0849097	0.0693025		4.13502	1.64377		4.10444	1.59042		2.69289	1.71153
909 ms	0.594321	1.03578		1.0981	1.0642		1.16591	1.06885		0.809259	0.859146			2.15419	1.87401		2.615	1.28328		3.14756	1.92104		4.59496	2.3601			0.0868843	0.0708519		4.13659	1.64368		4.10821	1.58963		2.70534	1.71054
910 ms	0.59364	1.03555		1.0961	1.06374		1.16343	1.06817		0.80764	0.858556			2.15026	1.87518		2.60849	1.28315		3.1401	1.92278		4.59149	2.36258			0.088493	0.071516		4.13796	1.64333		4.11177	1.58962		2.71749	1.70986
911 ms	0.592771	1.0353		1.09429	1.06308		1.16109	1.06738		0.806043	0.857906			2.14616	1.87551		2.60171	1.28312		3.13283	1.92462		4.58811	2.36493			0.0907272	0.0740654		4.13989	1.64204		4.11537	1.58882		2.73103	1.70874
912 ms	0.591697	1.03521		1.09237	1.06252		1.15878	1.06666		0.80441	0.85729			2.14205	1.87601		2.59498	1.2829		3.12542	1.92624		4.58447	2.36703			0.0933935	0.0757804		4.14195	1.64185		4.11976	1.58812		2.74481	1.70684
913 ms	0.590587	1.03506		1.09071	1.06196		1.15645	1.066		0.802746	0.856645			2.13858	1.87569		2.58831	1.2828		3.11819	1.92781		4.58109	2.36939			0.0972485	0.0788921		4.1446	1.6408		4.1251	1.58723		2.76012	1.7047
914 ms	0.589461	1.03459		1.08878	1.06147		1.15421	1.06536		0.801063	0.856125			2.13473	1.87616		2.5816	1.28261		3.11101	1.92946		4.57733	2.37187			0.100447	0.0819321		4.14782	1.63986		4.13053	1.58642		2.7756	1.70281
915 ms	0.588399	1.03397		1.08684	1.06087		1.15189	1.06469		0.799296	0.855449			2.13123	1.8765		2.57527	1.28257		3.10394	1.93116		4.57374	2.37405			0.104439	0.0860961		4.15163	1.63911		4.13713	1.58472		2.79244	1.69946
916 ms	0.587322	1.03338		1.08475	1.06052		1.1496	1.06409		0.797602	0.854881			2.12775	1.87623		2.56876	1.28256		3.09681	1.93295		4.57002	2.37628			0.108058	0.0908606		4.15585	1.6382		4.14355	1.58374		2.80948	1.69662
917 ms	0.586582	1.03321		1.0827	1.06001		1.1473	1.06328		0.795929	0.854224			2.12506	1.87571		2.5621	1.28274		3.08976	1.93472		4.56652	2.37839			0.113272	0.0960857		4.16078	1.63756		4.15096	1.58116		2.82738	1.69326
918 ms	0.585784	1.03264		1.08062	1.0596		1.14484	1.06257		0.794238	0.853633			2.12202	1.87591		2.55597	1.28254		3.08271	1.93636		4.56289	2.38049			0.118504	0.101161		4.16585	1.63759		4.15868	1.5795		2.84576	1.68951
919 ms	0.5852	1.03263		1.07863	1.05914		1.14251	1.06171		0.792567	0.852985			2.11887	1.87548		2.54973	1.28243		3.07581	1.93816		4.55908	2.38262			0.125021	0.108766		4.1713	1.63642		4.16705	1.57705		2.86574	1.68599
920 ms	0.584906	1.03244		1.07659	1.05883		1.14012	1.06073		0.790913	0.852412			2.11508	1.87562		2.54333	1.28245		3.06879	1.94005		4.55557	2.38466			0.132615	0.116551		4.17714	1.63553		4.17617	1.57437		2.88622	1.68125
921 ms	0.584739	1.03254		1.07468	1.05829		1.13772	1.05983		0.789329	0.851776			2.11204	1.87546		2.53715	1.28254		3.06168	1.94167		4.55182	2.38651			0.143231	0.127362		4.18407	1.6342		4.18638	1.57035		2.90894	1.67467
922 ms	0.584563	1.03273		1.07264	1.0577		1.13542	1.05897		0.787779	0.851254			2.10859	1.8758		2.5307	1.28241		3.05469	1.94326		4.54826	2.38854			0.155573	0.140801		4.19154	1.63314		4.19772	1.56704		2.93362	1.66772
923 ms	0.583975	1.03224		1.0707	1.05703		1.1331	1.05805		0.786206	0.85061			2.1051	1.87611		2.52403	1.28273		3.0478	1.94487		4.54448	2.39037			0.172146	0.158436		4.20012	1.63182		4.2106	1.56221		2.96103	1.65858
924 ms	0.583393	1.0317		1.06879	1.05655		1.13072	1.05733		0.78464	0.850045			2.10143	1.87625		2.51771	1.28286		3.04101	1.94644		4.54072	2.39215			0.192813	0.181077		4.20978	1.62934		4.22552	1.55614		2.99137	1.64799
925 ms	0.582822	1.0315		1.06687	1.05591		1.12843	1.0565		0.78314	0.849385			2.09767	1.87623		2.51139	1.28322		3.03447	1.94799		4.53674	2.39386			0.219683	0.209961		4.22112	1.6263		4.24251	1.54874		3.02555	1.6352
926 ms	0.582087	1.03091		1.06496	1.05527		1.12609	1.0558		0.781626	0.848824			2.0948	1.87574		2.505	1.28317		3.02774	1.94947		4.53289	2.39552			0.253325	0.245836		4.23435	1.6223		4.26104	1.54023		3.06295	1.61938
927 ms	0.58112	1.03033		1.06297	1.05441		1.12376	1.05514		0.780098	0.848155			2.09157	1.87553		2.49857	1.28358		3.02131	1.95081		4.52895	2.39719			0.293925	0.289886		4.24844	1.61723		4.28115	1.52928		3.10465	1.6016
928 ms	0.580098	1.03007		1.06102	1.05394		1.12127	1.05451		0.778556	0.847585			2.08776	1.87499		2.49219	1.28367		3.01474	1.95209		4.52508	2.3989			0.342231	0.341744		4.26421	1.6107		4.30331	1.51714		3.14904	1.58158
929 ms	0.578882	1.02977		1.05912	1.05344		1.11868	1.05375		0.777051	0.846949			2.08432	1.87422		2.4859	1.28396		3.00814	1.9534		4.52086	2.4004			0.399339	0.401172		4.28072	1.60231		4.32675	1.50259		3.19586	1.55983
930 ms	0.577999	1.02994		1.05712	1.05293		1.11616	1.05311		0.775543	0.846376			2.08126	1.87341		2.47962	1.28382		3.00167	1.95464		4.5171	2.40166			0.465483	0.467268		4.29803	1.59244		4.35111	1.4861		3.24484	1.53693
931 ms	0.577122	1.03004		1.05509	1.05237		1.11361	1.05249		0.774054	0.845663			2.07738	1.8726		2.47356	1.28387		2.99513	1.95602		4.51303	2.40344			0.537658	0.53822		4.31675	1.58083		4.37547	1.46859		3.29405	1.51367
932 ms	0.576199	1.02962		1.05318	1.05187		1.11114	1.05192		0.772535	0.84508			2.07378	1.87161		2.46729	1.28391		2.98845	1.9572		4.50905	2.40481			0.617102	0.611767		4.3357	1.56666		4.40068	1.44893		3.34334	1.49017
933 ms	0.575498	1.02937		1.05113	1.05128		1.10859	1.05141		0.771017	0.844385			2.06894	1.87171		2.46073	1.2844		2.98221	1.9583		4.50517	2.40644			0.701219	0.686364		4.35496	1.55168		4.42578	1.42769		3.39168	1.46771
934 ms	0.574503	1.02896		1.04915	1.05082		1.10619	1.05097		0.769525	0.843769			2.06512	1.87097		2.4546	1.28425		2.97562	1.9597		4.50097	2.40773			0.789552	0.760154		4.37484	1.53485		4.45048	1.40573		3.43793	1.44604
935 ms	0.573695	1.02812		1.04702	1.05018		1.10381	1.0503		0.768007	0.843141			2.06153	1.87071		2.4482	1.28463		2.96926	1.96108		4.49696	2.40914			0.88023	0.830885		4.39463	1.51678		4.47423	1.38299		3.48277	1.42581
936 ms	0.573308	1.02782		1.04498	1.04951		1.10145	1.04961		0.766463	0.84239			2.05727	1.87033		2.44213	1.28442		2.963	1.96225		4.49316	2.41051			0.972447	0.896625		4.41458	1.49811		4.497	1.35971		3.52542	1.40674
937 ms	0.572955	1.02709		1.04306	1.0488		1.09913	1.04887		0.764913	0.841713			2.05345	1.86997		2.43611	1.28434		2.95669	1.96335		4.4891	2.41209			1.06281	0.956711		4.43445	1.47787		4.51891	1.33663		3.56552	1.38909
938 ms	0.572684	1.02663		1.041	1.04819		1.09698	1.04809		0.763374	0.841088			2.05011	1.8702		2.42978	1.28443		2.9503	1.96461		4.48506	2.41329			1.1532	1.01044		4.45294	1.45812		4.53986	1.31399		3.60372	1.37205
939 ms	0.572188	1.02649		1.03892	1.04758		1.09476	1.04756		0.761833	0.840499			2.04619	1.86999		2.42357	1.28438		2.94369	1.96578		4.48099	2.41477			1.24202	1.05897		4.47128	1.43827		4.55919	1.29187		3.63948	1.35657
940 ms	0.571586	1.02653		1.03692	1.04698		1.09255	1.04679		0.760365	0.839942			2.04291	1.86952		2.41769	1.28425		2.9371	1.96686		4.47686	2.41613			1.32923	1.10167		4.48813	1.41779		4.57747	1.27027		3.67295	1.3418
941 ms	0.571235	1.02644		1.03485	1.04633		1.09023	1.04603		0.758873	0.839309			2.03909	1.86891		2.41178	1.2842		2.93074	1.9676		4.473	2.41749			1.41469	1.1394		4.5042	1.39723		4.59432	1.25028		3.70468	1.32729
942 ms	0.570601	1.02658		1.03285	1.04549		1.08816	1.04561		0.757391	0.838648			2.0361	1.8682		2.40595	1.2842		2.92452	1.96838		4.46886	2.41852			1.49836	1.17295		4.51907	1.37675		4.60983	1.23087		3.73394	1.31302
943 ms	0.569585	1.02586		1.03082	1.04481		1.086	1.04497		0.755922	0.838102			2.03273	1.86767		2.39993	1.28457		2.91815	1.96933		4.4645	2.41971			1.57963	1.20305		4.53242	1.35527		4.62357	1.21288		3.76149	1.2991
944 ms	0.568549	1.02544		1.02887	1.04426		1.08395	1.04448		0.754467	0.837505			2.02921	1.86734		2.39422	1.28482		2.91209	1.97025		4.46029	2.42077			1.65957	1.23044		4.54446	1.33424		4.63579	1.19579		3.78738	1.28576
945 ms	0.567282	1.02456		1.02693	1.04349		1.08175	1.04394		0.753076	0.836941			2.02524	1.86636		2.38818	1.28486		2.90605	1.97096		4.45589	2.42173			1.73712	1.25487		4.55589	1.31186		4.6461	1.17942		3.81116	1.27271
946 ms	0.566137	1.02395		1.0249	1.04282		1.07967	1.04348		0.751671	0.836288			2.02278	1.8659		2.38234	1.28505		2.90021	1.97167		4.45152	2.42275			1.81185	1.27794		4.56585	1.28846		4.65511	1.16439		3.83351	1.25969
947 ms	0.564965	1.02341		1.02275	1.04215		1.07756	1.04296		0.750239	0.835691			2.02005	1.86559		2.37654	1.28511		2.8942	1.97259		4.44697	2.42358			1.88299	1.29712		4.57536	1.26462		4.66151	1.15075		3.85343	1.24708
948 ms	0.564007	1.02335		1.02075	1.0415		1.07546	1.04254		0.748864	0.835155			2.01784	1.86509		2.37055	1.28519		2.88818	1.97347		4.44254	2.42442			1.9503	1.3142		4.58348	1.24152		4.66622	1.13757		3.87284	1.23547
949 ms	0.563258	1.02312		1.01861	1.04108		1.0731	1.04174		0.747536	0.834654			2.01417	1.86452		2.36472	1.28506		2.88188	1.97409		4.43819	2.42541			2.01194	1.32975		4.59037	1.21808		4.66899	1.12591		3.88964	1.22478
950 ms	0.562387	1.02292		1.01654	1.04059		1.07102	1.04138		0.746163	0.834005			2.01109	1.86364		2.35879	1.28523		2.87592	1.97476		4.43381	2.42635			2.06875	1.34384		4.59609	1.19589		4.67048	1.11531		3.90413	1.21508
951 ms	0.561607	1.02299		1.01437	1.04		1.06875	1.04083		0.74474	0.833281			2.00761	1.86327		2.35291	1.28518		2.86973	1.9755		4.42947	2.42715			2.12055	1.35597		4.60039	1.17441		4.67002	1.10489		3.91612	1.20582
952 ms	0.560875	1.02299		1.01235	1.03953		1.06661	1.04022		0.743243	0.832603			2.00451	1.86267		2.34744	1.28515		2.86372	1.97609		4.42529	2.42799			2.16712	1.36577		4.60322	1.15415		4.66849	1.0962		3.92622	1.1975
953 ms	0.560369	1.02273		1.01024	1.03907		1.0644	1.03926		0.741784	0.83192			2.00066	1.86201		2.34137	1.28527		2.85796	1.97678		4.42105	2.4286			2.20789	1.37357		4.60478	1.13584		4.66454	1.08796		3.93399	1.1901
954 ms	0.560113	1.02244		1.00839	1.03859		1.06234	1.03856		0.74037	0.831267			1.99729	1.86119		2.33557	1.28536		2.85198	1.9775		4.41696	2.42915			2.24427	1.38098		4.60414	1.11916		4.65999	1.08069		3.94074	1.1831
955 ms	0.559463	1.02189		1.00636	1.03801		1.06029	1.03777		0.738951	0.830615			1.9929	1.86092		2.32993	1.28541		2.84598	1.97811		4.41242	2.4297			2.27548	1.3869		4.60276	1.10324		4.65388	1.07448		3.94426	1.17614
956 ms	0.558645	1.02127		1.00455	1.03738		1.05836	1.03717		0.737504	0.829898			1.98984	1.8602		2.32437	1.2855		2.84052	1.9789		4.40785	2.43027			2.30304	1.39201		4.60005	1.08891		4.64667	1.06914		3.94635	1.16995
957 ms	0.558217	1.0212		1.00269	1.03663		1.05633	1.03641		0.736145	0.829391			1.98719	1.85966		2.31908	1.28513		2.83472	1.97972		4.40334	2.43074			2.32736	1.39496		4.59665	1.0753		4.63821	1.06434		3.9473	1.16368
958 ms	0.557704	1.02102		1.00095	1.0358		1.05432	1.03566		0.734846	0.828962			1.98404	1.85861		2.31361	1.285		2.82919	1.98032		4.39877	2.43127			2.34784	1.39722		4.59219	1.06309		4.62885	1.06078		3.94741	1.15777
959 ms	0.5573	1.02122		0.999222	1.0351		1.05225	1.03494		0.733594	0.828506			1.98115	1.85795		2.30833	1.28487		2.82336	1.98096		4.39416	2.4317			2.36515	1.39951		4.5869	1.05145		4.61902	1.05738		3.94631	1.15223
960 ms	0.55647	1.0214		0.997369	1.03413		1.05028	1.03442		0.732246	0.828054			1.97809	1.85726		2.30301	1.28449		2.81761	1.98162		4.38927	2.4323			2.38015	1.40136		4.58105	1.04142		4.60881	1.05442		3.94416	1.14667
961 ms	0.555319	1.02116		0.995594	1.03348		1.04813	1.03382		0.730876	0.827533			1.97467	1.85638		2.29782	1.28431		2.81224	1.98214		4.38452	2.43302			2.3922	1.40266		4.57506	1.03187		4.59811	1.05203		3.94109	1.14121
962 ms	0.554605	1.02134		0.993856	1.03289		1.04616	1.03334		0.729544	0.82704			1.97171	1.85564		2.29224	1.2842		2.80667	1.98276		4.3799	2.43365			2.40292	1.40359		4.56901	1.02329		4.58783	1.0499		3.93758	1.13573
963 ms	0.553632	1.0214		0.992123	1.03224		1.04419	1.03273		0.728207	0.826627			1.96854	1.85455		2.28682	1.28396		2.80108	1.9834		4.3751	2.43419			2.41154	1.40406		4.56243	1.01612		4.57723	1.04849		3.93376	1.13057
964 ms	0.552569	1.02117		0.990242	1.03189		1.04214	1.03209		0.726823	0.826058			1.96539	1.8535		2.28109	1.28386		2.79565	1.98407		4.37033	2.43464			2.41837	1.40511		4.55602	1.00981		4.5669	1.04703		3.92979	1.12555
965 ms	0.551538	1.02088		0.98821	1.03141		1.04021	1.03156		0.725499	0.825571			1.9625	1.85275		2.27578	1.28363		2.7902	1.98482		4.36557	2.43487			2.42329	1.40507		4.54935	1.00386		4.55681	1.0458		3.9247	1.12051
966 ms	0.55086	1.02086		0.986071	1.03089		1.03822	1.03098		0.724145	0.824928			1.95972	1.85126		2.27021	1.28336		2.78512	1.98549		4.36077	2.43521			2.42749	1.40457		4.54256	0.999658		4.54657	1.0449		3.91948	1.11504
967 ms	0.550254	1.02067		0.984203	1.03071		1.03619	1.03032		0.722828	0.824423			1.95672	1.84975		2.2649	1.28316		2.77979	1.98601		4.35603	2.43557			2.42938	1.40392		4.53615	0.995992		4.53673	1.04516		3.91363	1.10967
968 ms	0.549942	1.02102		0.982159	1.03043		1.03427	1.02975		0.721506	0.82388			1.95346	1.84855		2.25909	1.28308		2.77443	1.98669		4.35114	2.43572			2.43013	1.4037		4.53015	0.993321		4.5272	1.04481		3.90749	1.10443
969 ms	0.549436	1.02068		0.980327	1.02997		1.03221	1.02911		0.720173	0.823414			1.95032	1.84727		2.25361	1.28286		2.76939	1.98722		4.34615	2.43597			2.42983	1.40328		4.52387	0.991467		4.51793	1.04498		3.90067	1.09929
970 ms	0.54952	1.02078		0.978453	1.02961		1.03034	1.02861		0.718915	0.822829			1.94684	1.84671		2.24852	1.28255		2.76401	1.98791		4.34141	2.43624			2.42789	1.402		4.51779	0.98971		4.5086	1.04455		3.8933	1.09411
971 ms	0.549446	1.0205		0.976596	1.02892		1.02844	1.02805		0.717738	0.822339			1.9427	1.84567		2.24335	1.28241		2.75851	1.9881		4.3365	2.43633			2.42462	1.39964		4.51154	0.988675		4.4994	1.04438		3.8851	1.08859
972 ms	0.549356	1.02059		0.974753	1.02855		1.02644	1.02756		0.716477	0.821736			1.93881	1.84488		2.23775	1.28243		2.75316	1.98838		4.33151	2.43672			2.42088	1.39695		4.5055	0.987509		4.48996	1.04461		3.87674	1.08303
973 ms	0.548674	1.01978		0.973084	1.02799		1.02447	1.02704		0.715212	0.821247			1.93505	1.84452		2.23216	1.28249		2.74762	1.98888		4.32656	2.43693			2.41511	1.39405		4.49949	0.986331		4.48037	1.04428		3.86788	1.07808
974 ms	0.548306	1.0194		0.971399	1.02726		1.02241	1.02652		0.714032	0.820691			1.9311	1.84392		2.22682	1.28231		2.74247	1.98916		4.32168	2.43689			2.40797	1.39136		4.49258	0.985825		4.47072	1.0435		3.85896	1.07288
975 ms	0.547725	1.01876		0.969816	1.02635		1.02035	1.02589		0.712859	0.820139			1.92765	1.8428		2.22195	1.28189		2.73709	1.98943		4.31669	2.437			2.40013	1.38706		4.48516	0.98517		4.46076	1.04328		3.849	1.0674
976 ms	0.547191	1.01876		0.968223	1.0258		1.01844	1.0252		0.711637	0.819463			1.92433	1.84165		2.21719	1.28153		2.73176	1.98951		4.31166	2.43703			2.39097	1.38235		4.47751	0.984276		4.45016	1.04302		3.83838	1.06239
977 ms	0.54632	1.01873		0.966466	1.02526		1.01645	1.02448		0.710373	0.818904			1.92106	1.84093		2.21191	1.2812		2.72649	1.98942		4.30691	2.43674			2.38033	1.37732		4.46887	0.984027		4.4397	1.04307		3.82721	1.05758
978 ms	0.545561	1.019		0.964896	1.02494		1.01459	1.02396		0.70913	0.81843			1.91829	1.83988		2.20646	1.28089		2.72178	1.98974		4.30181	2.43664			2.36856	1.3723		4.45956	0.983513		4.42929	1.04289		3.81563	1.05281
979 ms	0.544785	1.01889		0.963239	1.02426		1.01274	1.02336		0.707937	0.817944			1.91507	1.83887		2.20144	1.28048		2.71642	1.98995		4.29668	2.43657			2.35676	1.36692		4.45026	0.983797		4.41865	1.04241		3.80387	1.04747
980 ms	0.544119	1.01926		0.961594	1.02378		1.011	1.02282		0.706741	0.817573			1.91216	1.83735		2.19676	1.27999		2.71139	1.99001		4.29163	2.43638			2.34422	1.36036		4.44039	0.984044		4.40789	1.04281		3.79141	1.04195
981 ms	0.543396	1.01909		0.959913	1.02338		1.00941	1.02225		0.705464	0.816991			1.90884	1.83631		2.19181	1.27965		2.70607	1.99035		4.28653	2.43629			2.33099	1.3527		4.42962	0.984042		4.39657	1.04267		3.77829	1.03651
982 ms	0.542846	1.01945		0.958147	1.02306		1.0078	1.02171		0.704195	0.816577			1.9052	1.83551		2.18657	1.27944		2.70105	1.99057		4.28153	2.43598			2.31634	1.34524		4.41869	0.984339		4.38534	1.04259		3.76529	1.03143
983 ms	0.542242	1.01906		0.956317	1.02264		1.00608	1.02118		0.702946	0.816188			1.902	1.83417		2.18141	1.27923		2.69589	1.99119		4.27651	2.43586			2.30071	1.33788		4.40631	0.985091		4.37402	1.04237		3.7517	1.02624
984 ms	0.54191	1.01871		0.954592	1.02205		1.00424	1.02065		0.701699	0.815747			1.89853	1.8325		2.17639	1.2792		2.69091	1.99173		4.27129	2.43577			2.28521	1.32987		4.39405	0.985285		4.36199	1.04212		3.73795	1.02058
985 ms	0.541786	1.01837		0.952703	1.02145		1.0024	1.02009		0.700387	0.815144			1.89479	1.83177		2.17141	1.27907		2.68574	1.99193		4.26654	2.43559			2.26845	1.3212		4.38094	0.986128		4.35014	1.04204		3.72396	1.01447
986 ms	0.541688	1.0184		0.95109	1.02109		1.00063	1.01958		0.699093	0.814635			1.89143	1.83031		2.16621	1.27898		2.68086	1.99229		4.26168	2.4352			2.24889	1.31404		4.36717	0.986812		4.33832	1.04201		3.70908	1.00929
987 ms	0.541557	1.01805		0.949242	1.02066		0.998948	1.01918		0.697811	0.814004			1.8875	1.82949		2.16097	1.27885		2.67564	1.99261		4.25668	2.43494			2.22968	1.3061		4.35248	0.987873		4.32558	1.04147		3.69425	1.00374
988 ms	0.54154	1.0183		0.947413	1.0201		0.997044	1.01878		0.696578	0.813498			1.88477	1.82817		2.15593	1.2789		2.67048	1.99286		4.25193	2.43463			2.21039	1.29863		4.33767	0.988638		4.31303	1.04153		3.67908	0.998847
989 ms	0.541714	1.01772		0.945558	1.01954		0.9952	1.0183		0.69541	0.81286			1.88223	1.82703		2.15136	1.27861		2.66542	1.99288		4.24686	2.4345			2.19107	1.2901		4.32219	0.989335		4.30032	1.04072		3.6632	0.993504
990 ms	0.541646	1.01764		0.943907	1.01891		0.993353	1.01791		0.694271	0.812251			1.87917	1.8267		2.1466	1.27885		2.6603	1.99277		4.24207	2.43417			2.17116	1.28152		4.30678	0.989854		4.28704	1.0401		3.64786	0.987811
991 ms	0.541277	1.01734		0.942086	1.01835		0.991604	1.01754		0.693135	0.811503			1.87555	1.82567		2.14195	1.27882		2.65519	1.99285		4.2369	2.43387			2.15106	1.27251		4.29069	0.990618		4.2743	1.03889		3.63196	0.982303
992 ms	0.540912	1.01678		0.940604	1.01774		0.989844	1.01719		0.692088	0.81098			1.87342	1.82412		2.13754	1.27872		2.64996	1.9931		4.2317	2.43373			2.13113	1.26445		4.27422	0.991381		4.26079	1.03778		3.61545	0.977965
993 ms	0.540305	1.01584		0.939029	1.0172		0.987926	1.01675		0.691047	0.810353			1.87119	1.82289		2.13317	1.27854		2.64482	1.99311		4.22657	2.43325			2.11192	1.25521		4.25721	0.99253		4.24763	1.0369		3.59923	0.973198
994 ms	0.540042	1.01553		0.937415	1.01661		0.986059	1.01613		0.69002	0.809856			1.86859	1.82137		2.12854	1.27849		2.63994	1.99313		4.22142	2.43307			2.09188	1.24718		4.2405	0.993516		4.23511	1.03594		3.58254	0.968764
995 ms	0.539392	1.01502		0.935781	1.01608		0.984388	1.01566		0.688932	0.80919			1.86579	1.82043		2.12374	1.27848		2.63517	1.99321		4.21623	2.43305			2.07206	1.23845		4.2236	0.994588		4.22263	1.03477		3.56573	0.964708
996 ms	0.538538	1.01483		0.934311	1.01555		0.9827	1.01516		0.687837	0.808726			1.86307	1.81923		2.11896	1.2787		2.63044	1.99328		4.21133	2.43278			2.05204	1.23051		4.20618	0.995938		4.21022	1.03492		3.54894	0.961472
997 ms	0.537987	1.0144		0.932595	1.01495		0.981034	1.01475		0.686785	0.808243			1.86032	1.8173		2.11445	1.27831		2.62578	1.99348		4.20592	2.43253			2.03231	1.22303		4.18872	0.997008		4.19811	1.03438		3.53134	0.958234
998 ms	0.537606	1.01411		0.931055	1.01444		0.979308	1.01442		0.685684	0.807798			1.85824	1.81619		2.10954	1.27841		2.62088	1.99348		4.20085	2.43199			2.01276	1.2167		4.17146	0.998576		4.18623	1.03404		3.51417	0.955571
999 ms	0.536985	1.01377		0.929452	1.01403		0.97754	1.01405		0.684509	0.807229			1.85578	1.81502		2.10473	1.27836		2.61616	1.99359		4.19601	2.4314			1.99429	1.2095		4.15412	0.999855		4.1748	1.03413		3.49707	0.952965
1000 ms	0.536487	1.01363		0.927574	1.01366		0.975943	1.01366		0.683316	0.80671			1.85304	1.81423		2.10022	1.27834		2.6114	1.99371		4.19102	2.43097			1.97555	1.20282		4.13745	1.00077		4.16305	1.03454		3.47964	0.950637
1001 ms	0.535894	1.01317		0.925917	1.0133		0.974257	1.01327		0.682133	0.806104			1.85065	1.81342		2.09548	1.27863		2.60685	1.99369		4.18614	2.43031			1.9575	1.19645		4.12025	1.00177		4.15148	1.03515		3.46218	0.949082
1002 ms	0.535662	1.01273		0.924415	1.01292		0.972459	1.01289		0.680942	0.805644			1.84765	1.81257		2.09125	1.27874		2.6022	1.99381		4.18128	2.42945			1.93976	1.19114		4.10355	1.00294		4.14052	1.03583		3.44478	0.947398
1003 ms	0.535208	1.01201		0.922835	1.01231		0.970768	1.01253		0.67972	0.804935			1.84585	1.81159		2.08694	1.27883		2.5974	1.99399		4.17614	2.42864			1.92339	1.1862		4.0872	1.00418		4.12918	1.03615		3.42797	0.946376
1004 ms	0.535206	1.01179		0.921185	1.01203		0.969013	1.01206		0.678503	0.804237			1.84376	1.81111		2.08248	1.27879		2.59285	1.9941		4.17119	2.42786			1.90769	1.18133		4.07063	1.00579		4.11839	1.03737		3.41142	0.946212
1005 ms	0.535131	1.01114		0.91966	1.01167		0.967293	1.0115		0.677405	0.80367			1.84115	1.81063		2.07814	1.27873		2.58841	1.99425		4.1661	2.42771			1.89193	1.17734		4.05465	1.00678		4.10748	1.03899		3.39485	0.946606
1006 ms	0.534995	1.01084		0.918035	1.01117		0.96567	1.01089		0.676312	0.803083			1.83832	1.80978		2.07399	1.27869		2.58379	1.99426		4.16076	2.4273			1.87522	1.17449		4.03911	1.00845		4.09693	1.04056		3.3785	0.947128
1007 ms	0.534892	1.01054		0.916689	1.01079		0.964113	1.01041		0.675228	0.802515			1.8359	1.80876		2.06942	1.27872		2.57957	1.99431		4.15565	2.42706			1.86023	1.17172		4.02345	1.01043		4.08682	1.04175		3.36282	0.948484
1008 ms	0.534739	1.01003		0.915401	1.01022		0.962505	1.0101		0.67419	0.801913			1.8335	1.80775		2.0652	1.27832		2.57502	1.9944		4.1504	2.42657			1.84478	1.16953		4.00825	1.01262		4.07691	1.04365		3.3472	0.950246
1009 ms	0.53452	1.00983		0.914185	1.00986		0.96093	1.00964		0.673234	0.801368			1.83069	1.80686		2.06091	1.278		2.5703	1.99452		4.14488	2.42622			1.83094	1.16707		3.99349	1.01477		4.06744	1.0453		3.3325	0.952289
1010 ms	0.534371	1.00982		0.912777	1.00974		0.959337	1.00907		0.672278	0.800897			1.82757	1.80568		2.05657	1.27791		2.56609	1.99437		4.13943	2.42593			1.81688	1.16513		3.97896	1.01689		4.05854	1.04756		3.31712	0.954843
1011 ms	0.533695	1.0094		0.911489	1.00955		0.957742	1.00849		0.671285	0.800415			1.82452	1.8047		2.0525	1.27833		2.56169	1.99397		4.1342	2.42543			1.80238	1.16384		3.96477	1.01945		4.04989	1.04923		3.30192	0.957952
1012 ms	0.532719	1.00908		0.910043	1.00918		0.956091	1.00792		0.670186	0.79983			1.82179	1.80386		2.04828	1.27825		2.55711	1.99379		4.1291	2.4248			1.78909	1.16183		3.95082	1.02211		4.04192	1.05122		3.28801	0.960649
1013 ms	0.531939	1.00873		0.908599	1.00907		0.954398	1.00734		0.66911	0.799194			1.81907	1.80222		2.04397	1.27852		2.55293	1.99359		4.12383	2.4241			1.7773	1.16083		3.93786	1.02432		4.03402	1.05331		3.27461	0.964089
1014 ms	0.53117	1.00825		0.90725	1.00861		0.952767	1.0068		0.668019	0.798517			1.8161	1.80089		2.03979	1.27879		2.54828	1.99339		4.11863	2.42349			1.7649	1.15995		3.92459	1.02682		4.02666	1.05589		3.26136	0.967372
1015 ms	0.530316	1.00764		0.905866	1.00833		0.951116	1.00617		0.666858	0.797834			1.81276	1.79952		2.03621	1.27907		2.54391	1.99296		4.11338	2.42288			1.75384	1.15906		3.91213	1.02955		4.01994	1.05792		3.24899	0.971159
1016 ms	0.52925	1.00718		0.904257	1.00797		0.949496	1.00565		0.665665	0.797211			1.81002	1.79797		2.03193	1.27938		2.53965	1.99254		4.10814	2.42218			1.74172	1.15857		3.89933	1.03223		4.01316	1.06098		3.23647	0.975325
1017 ms	0.528586	1.00655		0.902858	1.00747		0.947863	1.00526		0.664443	0.796522			1.80666	1.79618		2.028	1.27929		2.53493	1.99227		4.10304	2.42145			1.73052	1.15797		3.8878	1.03487		4.00705	1.06395		3.22495	0.979441
1018 ms	0.528115	1.00607		0.901558	1.00691		0.946315	1.00473		0.663251	0.795845			1.80327	1.7943		2.02399	1.27892		2.53063	1.99197		4.09775	2.4212			1.7197	1.15773		3.87729	1.03789		4.00111	1.06677		3.21469	0.983647
1019 ms	0.527876	1.00532		0.900249	1.00662		0.94486	1.00429		0.662104	0.795182			1.80044	1.79181		2.0199	1.27904		2.52653	1.99157		4.09263	2.42051			1.70954	1.1575		3.86705	1.04089		3.9954	1.06991		3.20381	0.988125
1020 ms	0.52771	1.0048		0.898663	1.00604		0.943373	1.0037		0.660935	0.794522			1.79714	1.79064		2.01608	1.27889		2.52192	1.99134		4.08766	2.42015			1.69938	1.15669		3.85682	1.04437		3.99008	1.07305		3.19369	0.992742
1021 ms	0.527581	1.00403		0.89722	1.00544		0.941856	1.00305		0.659845	0.793923			1.7937	1.78881		2.01206	1.27886		2.51764	1.99075		4.08229	2.41941			1.68988	1.15618		3.84781	1.04721		3.98499	1.07632		3.18419	0.997841
1022 ms	0.52763	1.00357		0.895614	1.00481		0.940328	1.00241		0.658782	0.793276			1.79092	1.78665		2.00802	1.27871		2.51351	1.99055		4.07707	2.41882			1.68088	1.15649		3.83893	1.04996		3.98019	1.07991		3.17567	1.00245
1023 ms	0.527906	1.00263		0.894182	1.00414		0.938924	1.00179		0.657804	0.792579			1.78797	1.78432		2.0043	1.27849		2.50929	1.99034		4.07175	2.4184			1.67279	1.15637		3.83073	1.05328		3.97522	1.08301		3.16742	1.00716
1024 ms	0.527826	1.00194		0.892662	1.0037		0.937451	1.00108		0.656852	0.791951			1.78498	1.78253		2.00008	1.27862		2.50517	1.99012		4.06656	2.4177			1.6649	1.15675		3.82251	1.05657		3.97053	1.08616		3.1602	1.01163
1025 ms	0.527486	1.00135		0.891367	1.00319		0.936013	1.00057		0.655842	0.791263			1.78145	1.78066		1.99595	1.27875		2.50091	1.9901		4.06151	2.41675			1.65788	1.15736		3.81447	1.05919		3.96625	1.08989		3.15283	1.01627
1026 ms	0.526856	1.001		0.889889	1.0027		0.9346	0.99996		0.654818	0.790697			1.77837	1.77879		1.99216	1.27879		2.4967	1.99005		4.05628	2.4159			1.65086	1.15756		3.80648	1.06226		3.96191	1.09326		3.14634	1.02042
1027 ms	0.526307	1.00049		0.888808	1.00223		0.933275	0.999402		0.653842	0.790093			1.7751	1.77697		1.98807	1.27901		2.49265	1.98981		4.05083	2.4151			1.6446	1.15784		3.79904	1.06466		3.95774	1.09661		3.13992	1.02387
1028 ms	0.52572	1.00027		0.887276	1.0019		0.931682	0.998792		0.652817	0.789403			1.77241	1.77497		1.98451	1.27877		2.48834	1.98974		4.04574	2.41449			1.63952	1.15815		3.7915	1.06762		3.95339	1.09981		3.13415	1.02743
1029 ms	0.524514	0.999632		0.885861	1.00153		0.930087	0.9981		0.651797	0.788833			1.76875	1.77312		1.98034	1.27877		2.48408	1.9894		4.04054	2.41385			1.63424	1.15809		3.78437	1.07039		3.94956	1.10268		3.12838	1.0308
1030 ms	0.523737	0.999498		0.884542	1.00119		0.928492	0.997393		0.650734	0.788128			1.76606	1.77123		1.97661	1.27892		2.47996	1.98893		4.03549	2.41293			1.62926	1.15822		3.77785	1.07299		3.9458	1.10563		3.12329	1.03382
1031 ms	0.522942	0.998965		0.883211	1.00084		0.926977	0.996905		0.649703	0.787473			1.76324	1.76901		1.97306	1.27879		2.47597	1.98847		4.03035	2.41232			1.6239	1.15891		3.77124	1.07547		3.94162	1.10853		3.118	1.03711
1032 ms	0.522282	0.998654		0.881545	1.00037		0.925442	0.996362		0.648703	0.786774			1.76107	1.76697		1.96932	1.27848		2.47174	1.98803		4.02503	2.41157			1.61898	1.1591		3.76476	1.07806		3.93741	1.11122		3.1135	1.03999
1033 ms	0.521875	0.998325		0.880219	0.999831		0.923813	0.995756		0.64771	0.785998			1.75802	1.76485		1.96569	1.27803		2.46741	1.98744		4.01981	2.41081			1.61424	1.16034		3.75829	1.08072		3.93359	1.11385		3.10924	1.04361
1034 ms	0.521437	0.997875		0.878788	0.999308		0.922273	0.995345		0.646694	0.785269			1.755	1.76255		1.96225	1.27759		2.46352	1.98681		4.01463	2.4099			1.6095	1.16156		3.7514	1.08363		3.92946	1.11594		3.10495	1.04717
1035 ms	0.521121	0.997343		0.877501	0.99875		0.920917	0.994924		0.645689	0.78462			1.75148	1.76038		1.9586	1.27726		2.45959	1.98649		4.00937	2.40908			1.60352	1.16313		3.74486	1.08589		3.92532	1.11808		3.1004	1.05022
1036 ms	0.521331	0.997382		0.876145	0.998286		0.919609	0.994426		0.644652	0.783816			1.74912	1.7587		1.95511	1.27716		2.45552	1.98613		4.00427	2.4082			1.59883	1.16471		3.73889	1.08818		3.9202	1.12005		3.09626	1.05349
1037 ms	0.521177	0.997151		0.874673	0.997736		0.918275	0.993956		0.643627	0.783149			1.74614	1.75653		1.95144	1.27696		2.45152	1.98572		3.99908	2.40737			1.59474	1.16597		3.73243	1.09035		3.91578	1.12192		3.09235	1.05625
1038 ms	0.521019	0.997099		0.873262	0.997103		0.916957	0.993317		0.642506	0.782342			1.74279	1.75504		1.94784	1.27687		2.44732	1.98538		3.99393	2.40658			1.59042	1.16664		3.72613	1.09306		3.91128	1.1231		3.08862	1.05896
1039 ms	0.520921	0.996713		0.872095	0.996637		0.915807	0.992894		0.641488	0.781755			1.73923	1.75289		1.94418	1.27688		2.44329	1.98499		3.98881	2.40586			1.58622	1.16731		3.72002	1.09483		3.90635	1.12448		3.0845	1.06109
1040 ms	0.521121	0.996556		0.870912	0.996161		0.914584	0.992403		0.640523	0.781131			1.73636	1.75135		1.94072	1.27679		2.4396	1.98475		3.98363	2.40518			1.58252	1.16819		3.71444	1.09652		3.90127	1.12567		3.08022	1.06338
1041 ms	0.521122	0.996406		0.86971	0.995622		0.913393	0.991875		0.639567	0.780529			1.73335	1.74941		1.93718	1.27656		2.43531	1.98421		3.97837	2.40456			1.57886	1.16912		3.70881	1.09827		3.89593	1.1272		3.07641	1.06528
1042 ms	0.520959	0.996211		0.868575	0.995164		0.912145	0.991251		0.638632	0.779932			1.73068	1.74738		1.9338	1.27648		2.43172	1.98389		3.97318	2.40381			1.57638	1.16933		3.70293	1.10021		3.89133	1.12764		3.07285	1.06731
1043 ms	0.52053	0.995738		0.867474	0.994741		0.910854	0.990906		0.637761	0.779472			1.72772	1.74506		1.93036	1.27619		2.42789	1.9834		3.96783	2.40302			1.57311	1.17029		3.69703	1.10167		3.88646	1.1287		3.06889	1.06969
1044 ms	0.520132	0.99538		0.866212	0.994323		0.909492	0.990521		0.636867	0.778941			1.72387	1.74315		1.92696	1.27598		2.42409	1.98291		3.96293	2.40221			1.56995	1.17111		3.69165	1.1027		3.88087	1.12932		3.06459	1.07174
1045 ms	0.519697	0.995247		0.865051	0.993892		0.908128	0.990159		0.636037	0.778482			1.72113	1.74073		1.92339	1.27583		2.42072	1.98246		3.95772	2.40131			1.56783	1.17198		3.68594	1.10309		3.8754	1.13003		3.06086	1.0735
1046 ms	0.519175	0.995215		0.863685	0.993377		0.906504	0.989607		0.635157	0.777896			1.71899	1.7388		1.91998	1.2758		2.41725	1.98202		3.95274	2.40048			1.56566	1.1733		3.68014	1.10441		3.87062	1.13008		3.05692	1.07577
1047 ms	0.518345	0.994918		0.862398	0.992922		0.904978	0.989198		0.634238	0.777369			1.71592	1.73628		1.91652	1.27562		2.41374	1.98157		3.94748	2.3998			1.56335	1.17368		3.67392	1.1057		3.86533	1.13016		3.05316	1.07747
1048 ms	0.517593	0.994535		0.861039	0.992592		0.903321	0.988812		0.633306	0.776741			1.71296	1.73474		1.91286	1.27578		2.41024	1.98147		3.94247	2.39893			1.56119	1.17446		3.66881	1.10583		3.86064	1.12996		3.04929	1.07971
1049 ms	0.516906	0.994582		0.859798	0.992199		0.901864	0.988387		0.632375	0.776216			1.71016	1.73279		1.90926	1.27591		2.40622	1.98103		3.93751	2.3983			1.55922	1.17565		3.66334	1.10634		3.85536	1.13027		3.04539	1.08163
1050 ms	0.516419	0.99448		0.858483	0.991766		0.900488	0.98787		0.631401	0.775557			1.70744	1.73115		1.90574	1.27594		2.40247	1.98065		3.93262	2.39763			1.55704	1.17579		3.65804	1.10696		3.85032	1.12987		3.04131	1.08262
1051 ms	0.516091	0.994102		0.857417	0.99137		0.899026	0.987314		0.630466	0.77496			1.70576	1.72993		1.90231	1.27582		2.39871	1.98026		3.92715	2.39704			1.55452	1.17689		3.652	1.1082		3.84586	1.12939		3.03766	1.08447
1052 ms	0.515833	0.993507		0.856261	0.990938		0.897705	0.986956		0.629564	0.77438			1.70289	1.72848		1.89905	1.27575		2.39454	1.98003		3.92204	2.39653			1.55201	1.17753		3.64644	1.10921		3.84105	1.12915		3.03331	1.08595
1053 ms	0.515742	0.992989		0.854992	0.990475		0.896556	0.986511		0.628587	0.773752			1.70058	1.72748		1.89565	1.27561		2.39072	1.97996		3.91673	2.39592			1.54993	1.17816		3.64101	1.11007		3.83611	1.12856		3.02949	1.0872
1054 ms	0.515886	0.992781		0.853802	0.990021		0.895382	0.986023		0.627602	0.773151			1.69815	1.72566		1.89238	1.27567		2.38699	1.97952		3.91175	2.39527			1.54733	1.17985		3.63568	1.11065		3.83132	1.12802		3.02537	1.08812
1055 ms	0.515882	0.992779		0.852805	0.989555		0.894298	0.985573		0.626645	0.772627			1.69618	1.72364		1.8892	1.2754		2.38349	1.97915		3.90677	2.39476			1.5453	1.18103		3.62988	1.11164		3.82631	1.12741		3.02113	1.08878
1056 ms	0.515805	0.992309		0.851529	0.989086		0.893068	0.985217		0.625684	0.771963			1.6938	1.72203		1.8861	1.27522		2.38005	1.97886		3.90162	2.39414			1.54249	1.18216		3.62408	1.11217		3.82116	1.12687		3.01708	1.08954
1057 ms	0.515669	0.992115		0.850494	0.988544		0.891774	0.98492		0.624731	0.771378			1.69167	1.72028		1.88277	1.27499		2.37675	1.97857		3.8967	2.39336			1.53992	1.1839		3.61809	1.11269		3.81607	1.12663		3.0133	1.09058
1058 ms	0.515149	0.991979		0.849436	0.988027		0.890581	0.984465		0.623803	0.770807			1.68891	1.7186		1.87997	1.27495		2.37338	1.9783		3.89211	2.39268			1.53809	1.18522		3.6125	1.11261		3.81039	1.12659		3.00931	1.09133
1059 ms	0.514606	0.99177		0.848262	0.987489		0.889173	0.983937		0.622838	0.770152			1.68693	1.71723		1.87661	1.27487		2.37001	1.97779		3.88707	2.39196			1.53622	1.18653		3.60705	1.11251		3.80511	1.12614		3.00537	1.09217
1060 ms	0.514106	0.991746		0.847323	0.986928		0.887736	0.983459		0.621943	0.769598			1.68418	1.71502		1.8736	1.2748		2.36643	1.97702		3.88227	2.39117			1.53425	1.18755		3.6014	1.11209		3.79947	1.12629		3.00121	1.0928
1061 ms	0.513178	0.991445		0.846174	0.986441		0.886338	0.983039		0.621087	0.768986			1.68163	1.71367		1.87026	1.2747		2.36281	1.97639		3.87735	2.39057			1.5328	1.18814		3.59629	1.11152		3.79379	1.1257		2.99675	1.09353
1062 ms	0.512528	0.99123		0.844934	0.985847		0.884983	0.982633		0.620238	0.768551			1.67934	1.71251		1.86706	1.2746		2.35961	1.97578		3.87237	2.39001			1.53055	1.18907		3.59058	1.11159		3.78798	1.12523		2.99245	1.09442
1063 ms	0.511795	0.991101		0.843827	0.985485		0.883637	0.982351		0.619379	0.768013			1.67717	1.71127		1.86372	1.27444		2.35598	1.97509		3.86748	2.3893			1.52904	1.1894		3.58535	1.11121		3.78212	1.12485		2.98812	1.09542
1064 ms	0.51096	0.990765		0.84274	0.985188		0.882323	0.981951		0.618526	0.767525			1.67497	1.70995		1.86058	1.2745		2.35223	1.9745		3.86259	2.38865			1.52773	1.19036		3.58008	1.11127		3.77604	1.12425		2.98373	1.09631
1065 ms	0.510682	0.990539		0.841555	0.984686		0.88096	0.981741		0.617725	0.767017			1.67258	1.70816		1.85703	1.27412		2.34827	1.974		3.8578	2.38765			1.52665	1.19159		3.57477	1.11105		3.77	1.12321		2.9797	1.0969
1066 ms	0.51024	0.990565		0.840466	0.984258		0.879759	0.981455		0.616851	0.766509			1.66909	1.70633		1.85397	1.27374		2.34503	1.97341		3.85313	2.38693			1.52534	1.19189		3.56947	1.11073		3.76401	1.12196		2.97556	1.09756
1067 ms	0.509998	0.99019		0.839258	0.983955		0.87844	0.981087		0.616006	0.765948			1.66631	1.70484		1.85073	1.27356		2.34151	1.97293		3.84846	2.38617			1.52363	1.19293		3.56469	1.11071		3.75814	1.12122		2.97131	1.09843
1068 ms	0.510073	0.989951		0.838227	0.983652		0.877053	0.980584		0.615124	0.76536			1.66354	1.70308		1.84748	1.27333		2.33803	1.97245		3.84369	2.38523			1.52196	1.19458		3.55944	1.11098		3.75219	1.12066		2.968	1.09948
1069 ms	0.509823	0.989538		0.837075	0.98328		0.875686	0.980081		0.614248	0.764766			1.66072	1.70084		1.84449	1.273		2.33412	1.97191		3.83896	2.38422			1.52105	1.19515		3.55426	1.11059		3.74628	1.12041		2.96436	1.10013
1070 ms	0.509923	0.989125		0.835917	0.982643		0.874277	0.979531		0.613341	0.764171			1.65807	1.69923		1.84141	1.27276		2.33078	1.9715		3.83413	2.38348			1.51983	1.1966		3.5495	1.11032		3.7402	1.11972		2.96071	1.10121
1071 ms	0.510187	0.988778		0.834721	0.98206		0.872855	0.979012		0.612464	0.763614			1.6546	1.69694		1.83849	1.27244		2.3272	1.97101		3.82909	2.38263			1.51824	1.19733		3.54481	1.10986		3.73432	1.11866		2.9568	1.10204
1072 ms	0.510117	0.988199		0.833346	0.981643		0.871547	0.978469		0.611535	0.76313			1.65157	1.69452		1.83549	1.27228		2.32396	1.97041		3.82398	2.38214			1.51641	1.19708		3.53989	1.10956		3.72833	1.11786		2.95283	1.10335
1073 ms	0.510005	0.987715		0.832129	0.981265		0.870224	0.978076		0.610709	0.762648			1.64905	1.69196		1.83217	1.27242		2.32045	1.97003		3.81899	2.38127			1.515	1.19848		3.53542	1.10936		3.72229	1.11662		2.94937	1.10482
1074 ms	0.509711	0.987279		0.830968	0.980782		0.868895	0.977604		0.609871	0.762161			1.64633	1.68994		1.82923	1.27208		2.31712	1.96961		3.81395	2.38059			1.51348	1.19869		3.53009	1.10915		3.71607	1.11507		2.94592	1.10569
1075 ms	0.509121	0.986912		0.829779	0.980112		0.867748	0.977161		0.609078	0.761729			1.64385	1.68762		1.82644	1.2719		2.31387	1.96946		3.80892	2.37996			1.51255	1.19836		3.52519	1.10845		3.7101	1.11406		2.94256	1.10672
1076 ms	0.508884	0.986658		0.828773	0.979665		0.866452	0.976672		0.608275	0.761187			1.64107	1.68529		1.82312	1.27191		2.3105	1.96922		3.80386	2.37928			1.51071	1.1986		3.52011	1.10838		3.70354	1.11225		2.93944	1.10798
1077 ms	0.508249	0.986403		0.827878	0.979304		0.865261	0.976057		0.607488	0.760761			1.63864	1.6822		1.82001	1.27169		2.30678	1.969		3.79881	2.37838			1.50968	1.1989		3.51449	1.10832		3.69696	1.11076		2.93628	1.10858
1078 ms	0.507391	0.986178		0.826907	0.978844		0.864067	0.975459		0.6067	0.760307			1.63596	1.67983		1.81679	1.27145		2.30354	1.96871		3.79399	2.37779			1.50904	1.19859		3.50889	1.10753		3.69111	1.1094		2.93329	1.10964
1079 ms	0.506702	0.985772		0.825901	0.978393		0.86285	0.97489		0.605902	0.759639			1.63324	1.67747		1.8138	1.27128		2.30049	1.96833		3.78925	2.3769			1.50798	1.19907		3.50416	1.10706		3.68489	1.10793		2.93012	1.11035
1080 ms	0.506113	0.985417		0.824936	0.977893		0.86165	0.974181		0.60513	0.759099			1.63102	1.67566		1.81114	1.27089		2.29694	1.96799		3.78451	2.37599			1.50678	1.1994		3.49877	1.1073		3.67853	1.10728		2.92712	1.11094
1081 ms	0.505282	0.984901		0.824037	0.977398		0.860381	0.973736		0.604335	0.75851			1.62817	1.67286		1.80776	1.27077		2.29363	1.96756		3.77967	2.37517			1.50562	1.20001		3.49368	1.10686		3.67245	1.10607		2.92397	1.11244
1082 ms	0.504971	0.984686		0.822952	0.977098		0.859113	0.973268		0.603537	0.757969			1.62591	1.67084		1.80475	1.27045		2.29013	1.96692		3.77506	2.37408			1.50475	1.20111		3.48869	1.10658		3.666	1.10428		2.92092	1.11346
1083 ms	0.504345	0.984234		0.821912	0.976787		0.857853	0.972752		0.602735	0.757415			1.62334	1.66879		1.802	1.27009		2.28692	1.96645		3.77048	2.3732			1.50386	1.20251		3.48394	1.10601		3.66011	1.10291		2.91809	1.11489
1084 ms	0.504316	0.983835		0.820768	0.976402		0.856486	0.972275		0.601972	0.756851			1.62004	1.66712		1.79875	1.26988		2.28386	1.96558		3.76594	2.37252			1.50346	1.20316		3.47946	1.10553		3.65424	1.10102		2.91507	1.11619
1085 ms	0.504304	0.983755		0.81963	0.976084		0.855175	0.971867		0.601156	0.756231			1.61744	1.66543		1.79575	1.26978		2.28041	1.96495		3.76117	2.37164			1.50298	1.20459		3.47488	1.10545		3.64801	1.09963		2.91282	1.11686
1086 ms	0.504201	0.983738		0.818525	0.97585		0.853901	0.971455		0.600357	0.755793			1.61488	1.66352		1.79262	1.26972		2.27707	1.96449		3.75626	2.37092			1.50212	1.20575		3.47007	1.10494		3.64214	1.09821		2.91031	1.11779
1087 ms	0.50421	0.983704		0.817571	0.975526		0.852486	0.971009		0.599535	0.755384			1.61276	1.66155		1.78979	1.26936		2.27388	1.9638		3.7515	2.37045			1.50172	1.20658		3.46506	1.10398		3.6362	1.09637		2.90768	1.1188
1088 ms	0.50436	0.983728		0.816377	0.975289		0.851191	0.970359		0.598713	0.754879			1.61079	1.6599		1.78685	1.26937		2.27047	1.9634		3.74668	2.36974			1.50123	1.20713		3.45973	1.10379		3.62987	1.09538		2.90515	1.1196
1089 ms	0.504118	0.983355		0.81534	0.974759		0.849752	0.969942		0.597862	0.754311			1.60786	1.65784		1.78388	1.26941		2.26721	1.96273		3.74169	2.36948			1.5007	1.20719		3.45482	1.10273		3.62426	1.09438		2.90225	1.1208
1090 ms	0.504091	0.983278		0.814229	0.974218		0.848459	0.969507		0.597029	0.753804			1.60468	1.65563		1.78102	1.26936		2.26357	1.96197		3.73693	2.36885			1.50069	1.20685		3.44983	1.10243		3.61834	1.09302		2.89925	1.1215
1091 ms	0.50345	0.982966		0.813202	0.973731		0.847204	0.969154		0.596198	0.753266			1.60262	1.65388		1.77853	1.26943		2.26035	1.96137		3.73192	2.36802			1.50042	1.20713		3.44513	1.10184		3.61252	1.09198		2.89699	1.12231
1092 ms	0.503157	0.982877		0.812405	0.973368		0.846017	0.968682		0.595479	0.752866			1.59968	1.65192		1.77562	1.2694		2.25711	1.96082		3.72692	2.36748			1.49992	1.20746		3.43969	1.10144		3.60656	1.09046		2.89392	1.12377
1093 ms	0.502661	0.982501		0.811622	0.972723		0.844677	0.96812		0.594768	0.752455			1.59749	1.65011		1.77274	1.26926		2.2538	1.96025		3.72222	2.36676			1.49926	1.20802		3.43453	1.10156		3.60065	1.08934		2.89161	1.12513
1094 ms	0.502189	0.982146		0.810589	0.972183		0.843438	0.967637		0.594098	0.751912			1.59479	1.64882		1.76978	1.26923		2.25045	1.95994		3.71765	2.36591			1.49844	1.20865		3.42979	1.10092		3.59473	1.08863		2.88859	1.12642
1095 ms	0.501515	0.982063		0.809824	0.971632		0.842148	0.967185		0.59339	0.75148			1.59207	1.64689		1.76703	1.26909		2.24724	1.95917		3.71309	2.3651			1.49818	1.20912		3.42543	1.10078		3.58835	1.08741		2.88608	1.1275
1096 ms	0.50111	0.982121		0.808992	0.971236		0.841001	0.966663		0.592714	0.751083			1.58968	1.64557		1.76419	1.2688		2.24412	1.95864		3.70873	2.36425			1.49783	1.20941		3.42031	1.10074		3.58198	1.08619		2.8834	1.12845
1097 ms	0.500349	0.982132		0.808203	0.970928		0.839722	0.966172		0.591972	0.750467			1.58826	1.64432		1.76147	1.26871		2.24111	1.9581		3.70426	2.36328			1.49692	1.21031		3.41568	1.10002		3.57566	1.08532		2.88075	1.12997
1098 ms	0.50001	0.982246		0.807298	0.970574		0.838473	0.965556		0.591264	0.74997			1.58573	1.64247		1.75859	1.2686		2.23812	1.95763		3.69997	2.36248			1.49552	1.21061		3.41099	1.09931		3.569	1.08446		2.87789	1.13073
1099 ms	0.499412	0.98171		0.806243	0.970041		0.837206	0.965042		0.590497	0.749301			1.58423	1.641		1.75612	1.26843		2.23517	1.95703		3.69572	2.36157			1.49506	1.2101		3.40702	1.09869		3.56286	1.0834		2.87518	1.13127
1100 ms	0.499135	0.98187		0.80517	0.969817		0.836054	0.964543		0.589711	0.748663			1.58215	1.63995		1.75337	1.26828		2.23223	1.95648		3.69148	2.36068			1.49481	1.20988		3.40185	1.09782		3.55595	1.08217		2.87161	1.13163
1101 ms	0.499003	0.981723		0.804148	0.969528		0.834892	0.96405		0.588894	0.748082			1.58016	1.63787		1.75053	1.26827		2.22928	1.95563		3.68706	2.35976			1.49398	1.20951		3.39677	1.0973		3.54939	1.08047		2.8685	1.13255
1102 ms	0.498774	0.981342		0.802995	0.969212		0.83383	0.963706		0.588122	0.74754			1.57778	1.63638		1.74788	1.26795		2.22633	1.95514		3.68263	2.35914			1.49279	1.20999		3.39173	1.09616		3.54299	1.0785		2.86511	1.13359
1103 ms	0.498515	0.981313		0.801795	0.968836		0.832595	0.963346		0.587358	0.747071			1.57536	1.63468		1.74526	1.26799		2.22305	1.95476		3.67818	2.35837			1.49166	1.20974		3.38675	1.09551		3.53658	1.0766		2.86165	1.13452
1104 ms	0.498614	0.981202		0.800635	0.968454		0.831425	0.962916		0.586656	0.746735			1.57273	1.6331		1.74223	1.2679		2.22011	1.95434		3.67364	2.35784			1.49068	1.20884		3.38188	1.09441		3.5301	1.0751		2.85819	1.13526
1105 ms	0.498554	0.98119		0.799623	0.968186		0.830151	0.962378		0.585911	0.746348			1.57072	1.6315		1.73933	1.26777		2.21693	1.95379		3.66897	2.35723			1.48992	1.20833		3.37662	1.09376		3.52436	1.07356		2.85444	1.13641
1106 ms	0.498582	0.981492		0.798686	0.967913		0.828903	0.961974		0.585184	0.745871			1.56841	1.62967		1.73628	1.26747		2.21387	1.95343		3.66469	2.35649			1.488	1.20831		3.37109	1.09254		3.51784	1.07241		2.8508	1.13791
1107 ms	0.498323	0.981431		0.797892	0.96748		0.827696	0.961543		0.584444	0.745332			1.56625	1.62742		1.73366	1.26725		2.21049	1.95288		3.66019	2.35597			1.4868	1.20742		3.36632	1.09121		3.51189	1.07101		2.84732	1.13913
1108 ms	0.497932	0.981633		0.797124	0.967124		0.826351	0.961165		0.583698	0.744843			1.56359	1.6256		1.73082	1.26695		2.20736	1.95245		3.65567	2.35575			1.48527	1.20705		3.36119	1.09024		3.50543	1.07006		2.84369	1.13981
1109 ms	0.497745	0.981828		0.796394	0.966659		0.824966	0.960643		0.582978	0.744252			1.56226	1.62373		1.72818	1.26676		2.20417	1.95191		3.65133	2.35491			1.48402	1.20599		3.356	1.08909		3.49932	1.06959		2.84011	1.14012
1110 ms	0.497472	0.981637		0.795753	0.966477		0.82377	0.960103		0.582241	0.743608			1.56031	1.6222		1.72514	1.26657		2.20138	1.95115		3.64694	2.35418			1.48241	1.20553		3.35132	1.08762		3.49265	1.06896		2.83663	1.1411
1111 ms	0.496937	0.981121		0.795066	0.965938		0.822486	0.959575		0.581564	0.743105			1.55875	1.62021		1.72261	1.26634		2.19856	1.95067		3.64268	2.35351			1.48118	1.20535		3.34619	1.08625		3.48657	1.06792		2.83313	1.14118
1112 ms	0.496602	0.981084		0.79434	0.965652		0.821348	0.959275		0.580862	0.742511			1.55674	1.61858		1.72015	1.26624		2.19572	1.95023		3.63852	2.35276			1.4792	1.20473		3.34113	1.08497		3.48013	1.06673		2.82957	1.14202
1113 ms	0.496162	0.980672		0.793535	0.965263		0.820172	0.95868		0.580191	0.74211			1.55537	1.61733		1.71779	1.26619		2.19302	1.94964		3.63415	2.35213			1.47809	1.20432		3.33577	1.08406		3.4738	1.0659		2.82576	1.14228
1114 ms	0.495745	0.98025		0.792607	0.964709		0.818952	0.958209		0.579534	0.741771			1.55372	1.61646		1.71501	1.2662		2.19017	1.94906		3.62978	2.35156			1.47602	1.20393		3.3304	1.08307		3.46787	1.06508		2.82183	1.14277
1115 ms	0.495493	0.980065		0.791546	0.964421		0.817755	0.957717		0.578907	0.741364			1.55195	1.61576		1.71237	1.26615		2.18739	1.94838		3.62561	2.3504			1.47453	1.20363		3.32523	1.08245		3.46193	1.06408		2.81829	1.14289
1116 ms	0.49533	0.979855		0.790639	0.964259		0.81677	0.957114		0.578253	0.74103			1.54965	1.61491		1.70953	1.26632		2.18498	1.94789		3.62106	2.34986			1.47309	1.20335		3.32009	1.08142		3.45661	1.06278		2.81484	1.14374
1117 ms	0.495215	0.979731		0.789593	0.963842		0.81574	0.956636		0.577605	0.740663			1.54767	1.614		1.70715	1.266		2.18212	1.94755		3.61675	2.34896			1.47137	1.20299		3.31412	1.08082		3.45098	1.06162		2.81147	1.14365
1118 ms	0.495225	0.979927		0.788284	0.963758		0.814555	0.956128		0.576845	0.740089			1.54653	1.61273		1.70432	1.26584		2.17906	1.94697		3.61218	2.34825			1.46952	1.20211		3.30839	1.08036		3.44474	1.06105		2.80802	1.1444
1119 ms	0.495151	0.979771		0.787207	0.963283		0.813445	0.955677		0.576145	0.739532			1.54424	1.61197		1.70133	1.2657		2.1762	1.94646		3.60791	2.34746			1.4686	1.20206		3.30306	1.07983		3.43852	1.06029		2.80433	1.14442
1120 ms	0.495223	0.979674		0.786063	0.96308		0.812327	0.955317		0.575428	0.739118			1.54333	1.60977		1.69858	1.26552		2.17316	1.9457		3.60337	2.34698			1.46678	1.20157		3.29767	1.07915		3.43245	1.05936		2.80066	1.14448
1121 ms	0.495367	0.979754		0.785083	0.963025		0.811122	0.954886		0.574673	0.738601			1.54084	1.60888		1.69616	1.26509		2.1706	1.94518		3.59895	2.34605			1.46544	1.20072		3.29247	1.0783		3.42633	1.05839		2.79724	1.14485
1122 ms	0.495397	0.979314		0.784355	0.962657		0.809999	0.954464		0.573954	0.738179			1.53837	1.60735		1.69346	1.26494		2.16748	1.94485		3.59436	2.34555			1.46383	1.19947		3.2872	1.07734		3.42033	1.0574		2.79349	1.14562
1123 ms	0.495277	0.97885		0.783479	0.962102		0.808723	0.954228		0.573263	0.737815			1.53631	1.60635		1.69113	1.26441		2.16433	1.94412		3.59002	2.34498			1.46109	1.19878		3.28142	1.07686		3.41379	1.05669		2.78938	1.14596
1124 ms	0.49521	0.978723		0.782563	0.961513		0.807378	0.953907		0.572634	0.737512			1.53578	1.60552		1.68879	1.26433		2.16151	1.94353		3.58538	2.34446			1.46023	1.19766		3.2764	1.07624		3.40771	1.05582		2.78546	1.14627
1125 ms	0.495088	0.97849		0.781941	0.960883		0.806303	0.95361		0.572015	0.737242			1.53299	1.60484		1.68644	1.26421		2.15893	1.94297		3.58125	2.34376			1.458	1.19788		3.27118	1.0763		3.40166	1.05492		2.78181	1.14662
1126 ms	0.494918	0.978312		0.781198	0.96024		0.805029	0.953164		0.571473	0.73719			1.53162	1.60369		1.68443	1.26375		2.15623	1.94219		3.57686	2.34309			1.45555	1.19704		3.2655	1.07525		3.39565	1.05404		2.77814	1.14724
1127 ms	0.49457	0.978353		0.780448	0.959726		0.803787	0.952764		0.570843	0.736831			1.52848	1.60397		1.68191	1.26329		2.15345	1.94184		3.57292	2.3423			1.45329	1.19629		3.26062	1.0747		3.38976	1.05326		2.77455	1.14833
1128 ms	0.494116	0.978391		0.779472	0.959093		0.802761	0.952381		0.570259	0.736498			1.52745	1.60284		1.67942	1.26319		2.15077	1.94129		3.56871	2.34211			1.45103	1.19682		3.25536	1.07475		3.38383	1.05212		2.7708	1.14916
1129 ms	0.493667	0.978618		0.778476	0.958454		0.801696	0.951828		0.569614	0.736065			1.52677	1.60169		1.67695	1.26278		2.14862	1.94065		3.56466	2.34157			1.44924	1.19709		3.25011	1.07435		3.3781	1.05115		2.76741	1.14918
1130 ms	0.493102	0.978763		0.77762	0.958163		0.800635	0.951355		0.568954	0.735705			1.52524	1.60096		1.67438	1.26258		2.14621	1.94015		3.56054	2.34093			1.44799	1.1968		3.24534	1.07374		3.37236	1.05017		2.76411	1.14947
1131 ms	0.49246	0.97851		0.776749	0.957751		0.799539	0.950857		0.568223	0.735131			1.52251	1.59934		1.67164	1.2621		2.14341	1.93965		3.55665	2.34028			1.44551	1.197		3.24036	1.07276		3.3667	1.04959		2.76041	1.15045
1132 ms	0.491743	0.978079		0.775861	0.957264		0.798399	0.950471		0.567561	0.734905			1.52058	1.59869		1.66899	1.26186		2.1406	1.93908		3.55214	2.34006			1.44389	1.1964		3.23506	1.07167		3.36116	1.0489		2.75621	1.15159
1133 ms	0.491112	0.977806		0.774797	0.957006		0.797362	0.950131		0.5668	0.734469			1.51857	1.59786		1.66615	1.26171		2.13791	1.93888		3.54779	2.33982			1.4421	1.19645		3.23087	1.07174		3.35558	1.04843		2.75282	1.1522
1134 ms	0.490767	0.977781		0.773541	0.956465		0.796334	0.949785		0.56609	0.734083			1.5165	1.59674		1.66396	1.26167		2.1354	1.93845		3.54323	2.33921			1.44034	1.19603		3.22594	1.07121		3.34991	1.04793		2.74906	1.15258
1135 ms	0.490508	0.977742		0.772591	0.956209		0.795097	0.949378		0.565421	0.733856			1.5137	1.59535		1.66119	1.26141		2.13246	1.9379		3.53915	2.33834			1.43835	1.19552		3.22167	1.0703		3.34359	1.04756		2.74519	1.15288
1136 ms	0.490266	0.977747		0.771626	0.956058		0.794035	0.949011		0.56469	0.733498			1.51067	1.5945		1.65897	1.26133		2.1295	1.93753		3.53458	2.3378			1.43648	1.19469		3.21701	1.06937		3.33778	1.04756		2.74139	1.15385
1137 ms	0.490161	0.977914		0.770665	0.9558		0.792817	0.948501		0.563933	0.733108			1.50819	1.59271		1.65668	1.2612		2.12675	1.9371		3.53037	2.337			1.435	1.19413		3.2128	1.06885		3.33153	1.04761		2.73827	1.15419
1138 ms	0.490182	0.978067		0.769693	0.955527		0.79164	0.947972		0.563217	0.73278			1.50605	1.59118		1.65441	1.26116		2.12422	1.93647		3.52583	2.33655			1.43291	1.19319		3.20798	1.0686		3.32532	1.04742		2.73474	1.15457
1139 ms	0.490476	0.978298		0.768789	0.955506		0.790514	0.947496		0.562488	0.732172			1.50338	1.58979		1.65233	1.26079		2.1222	1.93595		3.52151	2.33588			1.43172	1.19265		3.20386	1.06781		3.31948	1.0469		2.73186	1.15465
1140 ms	0.490544	0.978222		0.768015	0.955285		0.789388	0.94706		0.561826	0.731729			1.50086	1.58853		1.65004	1.2604		2.11983	1.93539		3.51714	2.33526			1.43022	1.19206		3.19896	1.06691		3.3139	1.04624		2.72841	1.15483
1141 ms	0.490348	0.977905		0.76743	0.954964		0.788218	0.946685		0.561174	0.731366			1.49889	1.5872		1.64756	1.26006		2.11727	1.935		3.51285	2.3346			1.42877	1.19201		3.19441	1.06683		3.30765	1.04627		2.72503	1.15503
1142 ms	0.490339	0.977774		0.766818	0.95462		0.787195	0.9463		0.560518	0.731027			1.49737	1.58601		1.64532	1.2598		2.11499	1.93458		3.50798	2.33399			1.42756	1.19102		3.18969	1.06626		3.30224	1.04583		2.72196	1.1559
1143 ms	0.48983	0.977314		0.766171	0.954047		0.78594	0.946001		0.559869	0.730657			1.49586	1.58426		1.64298	1.25924		2.11273	1.93395		3.50385	2.33322			1.4257	1.19094		3.18509	1.06637		3.29595	1.04497		2.71843	1.15626
1144 ms	0.48964	0.97699		0.765293	0.953314		0.784895	0.945765		0.559244	0.730294			1.49377	1.58384		1.64073	1.25872		2.11021	1.93378		3.49936	2.33292			1.42427	1.1903		3.18004	1.06579		3.29017	1.0442		2.71436	1.15691
1145 ms	0.489311	0.976967		0.764701	0.95294		0.78396	0.945416		0.558593	0.7299			1.49255	1.58315		1.63819	1.25832		2.10789	1.93351		3.49511	2.33233			1.4222	1.19008		3.17559	1.06547		3.28395	1.04341		2.71084	1.15727
1146 ms	0.488677	0.977073		0.763946	0.952428		0.782896	0.944946		0.557943	0.729635			1.49142	1.58219		1.63539	1.2581		2.10523	1.93297		3.49085	2.3314			1.42026	1.19018		3.17088	1.06542		3.27787	1.04295		2.70708	1.1579
1147 ms	0.488066	0.977341		0.763081	0.951765		0.781908	0.944466		0.557233	0.729193			1.48943	1.58099		1.63321	1.25789		2.10258	1.93245		3.48663	2.33054			1.41846	1.18907		3.16652	1.0649		3.27127	1.04266		2.70304	1.15892
1148 ms	0.487772	0.977535		0.762389	0.951453		0.780852	0.944008		0.55657	0.72886			1.48734	1.58045		1.63079	1.25769		2.10046	1.93179		3.48267	2.3296			1.41617	1.18938		3.16109	1.06398		3.26541	1.04176		2.69947	1.16016
1149 ms	0.487099	0.977596		0.761655	0.950946		0.779752	0.943617		0.555799	0.728282			1.4851	1.58004		1.6287	1.25751		2.09805	1.9314		3.47854	2.32896			1.41397	1.18984		3.15615	1.06413		3.25945	1.04157		2.69626	1.16035
1150 ms	0.487044	0.977603		0.760668	0.950551		0.778763	0.943165		0.555178	0.728025			1.48321	1.57966		1.6263	1.25743		2.09561	1.93105		3.47405	2.32823			1.4119	1.19009		3.15152	1.06361		3.25319	1.04162		2.69304	1.16112
1151 ms	0.486665	0.977608		0.759766	0.950323		0.777701	0.942693		0.55449	0.727617			1.48158	1.57835		1.62393	1.2573		2.09315	1.93023		3.46982	2.32715			1.41024	1.19076		3.14694	1.06373		3.24674	1.04127		2.69	1.1618
1152 ms	0.486655	0.977711		0.75868	0.949904		0.776649	0.942366		0.553837	0.72733			1.47893	1.57735		1.62173	1.25719		2.09068	1.9297		3.46533	2.32636			1.40924	1.19087		3.14258	1.0635		3.24107	1.04142		2.68655	1.16302
1153 ms	0.486603	0.977516		0.757833	0.949469		0.775709	0.94188		0.553149	0.72702			1.47684	1.5763		1.61988	1.25696		2.08811	1.92936		3.46129	2.32566			1.40775	1.19084		3.13817	1.06289		3.23498	1.04125		2.68374	1.16336
1154 ms	0.486854	0.977326		0.756835	0.949465		0.77478	0.941553		0.552471	0.726715			1.47568	1.5753		1.61755	1.25668		2.08569	1.92889		3.45704	2.32505			1.40581	1.19178		3.1333	1.06311		3.22976	1.04098		2.68093	1.16422
1155 ms	0.486938	0.977072		0.755886	0.949053		0.773763	0.941037		0.551728	0.726278			1.47367	1.57421		1.61535	1.25641		2.08308	1.92848		3.45268	2.32466			1.40515	1.1912		3.12928	1.06307		3.2241	1.04125		2.6781	1.16461
1156 ms	0.487112	0.976862		0.754965	0.948572		0.772765	0.940563		0.551087	0.725978			1.4717	1.57269		1.61283	1.25623		2.08061	1.92793		3.4488	2.32386			1.40331	1.19206		3.12453	1.06281		3.21789	1.04174		2.67465	1.16605
1157 ms	0.487223	0.976976		0.754212	0.948581		0.771789	0.940167		0.55043	0.725704			1.46989	1.57179		1.61077	1.25598		2.07817	1.92756		3.44481	2.32323			1.40249	1.19179		3.11971	1.06285		3.2127	1.04184		2.67138	1.16696
1158 ms	0.48722	0.977041		0.75344	0.948302		0.770873	0.939807		0.549805	0.725447			1.46804	1.57088		1.60847	1.25581		2.0762	1.927		3.44091	2.32246			1.40113	1.19163		3.11494	1.06229		3.20737	1.04247		2.668	1.16804
1159 ms	0.486871	0.976537		0.752902	0.948045		0.769749	0.939244		0.54916	0.725205			1.46659	1.56991		1.60637	1.25551		2.07351	1.92626		3.43711	2.32157			1.3996	1.19199		3.10956	1.06202		3.20168	1.04259		2.66565	1.16828
1160 ms	0.486582	0.976207		0.752005	0.947797		0.768702	0.938988		0.548509	0.724857			1.46438	1.56932		1.60406	1.25525		2.07094	1.92571		3.43294	2.32102			1.39801	1.19217		3.10463	1.06148		3.1958	1.04322		2.66238	1.16962
1161 ms	0.486294	0.976088		0.751408	0.947328		0.767488	0.93846		0.547886	0.724597			1.46278	1.56884		1.60196	1.25483		2.06851	1.92512		3.42904	2.32021			1.39706	1.19264		3.0997	1.06086		3.1897	1.04438		2.65949	1.17032
1162 ms	0.48552	0.975697		0.750607	0.946779		0.76657	0.938119		0.547235	0.724228			1.46069	1.56802		1.59971	1.25461		2.06592	1.92439		3.4249	2.31962			1.39595	1.19311		3.09532	1.0604		3.18407	1.04472		2.65665	1.17118
1163 ms	0.484996	0.97532		0.749673	0.946559		0.765677	0.937731		0.54662	0.723884			1.45933	1.56701		1.59775	1.2544		2.06336	1.92361		3.42073	2.31895			1.39533	1.19252		3.09054	1.05972		3.17883	1.04488		2.65388	1.17149
1164 ms	0.484216	0.975157		0.748753	0.946017		0.764722	0.937388		0.545915	0.72342			1.45757	1.56614		1.59533	1.25422		2.06092	1.9228		3.41683	2.31839			1.39372	1.19316		3.08597	1.0589		3.17295	1.04551		2.65113	1.17201
1165 ms	0.483776	0.975015		0.74782	0.945499		0.763754	0.937023		0.545248	0.723062			1.4557	1.56497		1.59308	1.25382		2.05823	1.92225		3.41261	2.318			1.39285	1.19398		3.08152	1.05826		3.16771	1.04583		2.64874	1.17304
1166 ms	0.483109	0.975023		0.746924	0.945053		0.76306	0.936717		0.544562	0.722699			1.45422	1.56448		1.59082	1.25356		2.0563	1.9218		3.40859	2.31758			1.39176	1.19435		3.07734	1.05781		3.16208	1.04665		2.64528	1.17402
1167 ms	0.483009	0.975105		0.7461	0.94448		0.762114	0.936357		0.543914	0.722242			1.45275	1.56339		1.58847	1.25321		2.05394	1.92122		3.40466	2.31718			1.39094	1.19538		3.07295	1.05815		3.15696	1.04723		2.64238	1.17505
1168 ms	0.482638	0.974908		0.745233	0.944145		0.761133	0.935985		0.543195	0.721778			1.45008	1.56297		1.58617	1.25312		2.05173	1.92054		3.40061	2.31663			1.39014	1.19602		3.06848	1.05811		3.15148	1.04758		2.63945	1.17598
1169 ms	0.482941	0.974786		0.74436	0.944025		0.760109	0.935594		0.54256	0.721506			1.44799	1.56189		1.58387	1.25273		2.0495	1.91996		3.39656	2.31614			1.38893	1.19645		3.06394	1.05785		3.14601	1.04798		2.63629	1.17662
1170 ms	0.482857	0.974421		0.743762	0.943615		0.759077	0.935242		0.541803	0.721121			1.4467	1.56079		1.58183	1.25229		2.04716	1.91974		3.39252	2.31582			1.38791	1.19722		3.05966	1.05743		3.14091	1.04902		2.63363	1.1779
1171 ms	0.483304	0.974144		0.742946	0.943068		0.758113	0.934625		0.541113	0.720715			1.44533	1.55992		1.57991	1.25191		2.04506	1.91917		3.38848	2.31519			1.38769	1.19793		3.05493	1.05681		3.13591	1.04982		2.63111	1.17906
1172 ms	0.483247	0.973549		0.742207	0.942715		0.757139	0.93417		0.540408	0.720307			1.44429	1.55941		1.57805	1.25152		2.04281	1.91854		3.38451	2.31492			1.38707	1.19831		3.05052	1.05684		3.13007	1.05048		2.62807	1.18022
1173 ms	0.483488	0.972902		0.741399	0.942288		0.756093	0.933717		0.539747	0.719978			1.44167	1.55875		1.5762	1.25132		2.04047	1.91793		3.3805	2.31439			1.38613	1.19956		3.04609	1.0564		3.12507	1.05108		2.62589	1.18157
1174 ms	0.483284	0.972661		0.74063	0.941854		0.755141	0.933267		0.539069	0.719645			1.43981	1.55787		1.57442	1.25111		2.03835	1.91727		3.3766	2.31358			1.38563	1.19944		3.04128	1.05538		3.12017	1.05122		2.6233	1.18228
1175 ms	0.483218	0.972315		0.739831	0.941392		0.754256	0.932784		0.538465	0.719306			1.43887	1.55681		1.57225	1.25095		2.03579	1.91689		3.37264	2.31327			1.38529	1.19932		3.03656	1.05497		3.11512	1.05149		2.6206	1.18288
1176 ms	0.482653	0.972188		0.739069	0.941042		0.753352	0.932251		0.537832	0.718928			1.43799	1.55618		1.57056	1.25054		2.03355	1.91641		3.36864	2.31285			1.38467	1.19928		3.03214	1.05452		3.10994	1.05243		2.61819	1.18405
1177 ms	0.482547	0.972268		0.738232	0.940721		0.752557	0.931834		0.537268	0.718592			1.4359	1.55619		1.56873	1.25013		2.03156	1.91551		3.36481	2.31247			1.38401	1.2001		3.0277	1.05481		3.10432	1.05258		2.61542	1.18468
1178 ms	0.481752	0.971964		0.737568	0.940548		0.751732	0.931427		0.536628	0.718202			1.4342	1.55529		1.56675	1.24993		2.0293	1.91504		3.3609	2.31196			1.38319	1.2004		3.02376	1.05485		3.09935	1.05294		2.61275	1.18602
1179 ms	0.481289	0.971633		0.736916	0.94026		0.750931	0.930933		0.536035	0.717768			1.43254	1.55427		1.56457	1.24964		2.02693	1.91467		3.35693	2.31112			1.38138	1.20114		3.01936	1.05473		3.09481	1.05354		2.61002	1.18679
1180 ms	0.480774	0.971814		0.736114	0.940041		0.749965	0.930446		0.535389	0.717246			1.43167	1.55327		1.56231	1.2493		2.02466	1.91394		3.3531	2.31061			1.38041	1.20186		3.01475	1.05478		3.08979	1.0536		2.60667	1.18818
1181 ms	0.480371	0.971273		0.735486	0.939903		0.749056	0.929948		0.534789	0.71689			1.43102	1.55199		1.5606	1.24884		2.02264	1.91318		3.34909	2.31023			1.3791	1.20243		3.01108	1.05508		3.08394	1.05435		2.60389	1.18953
1182 ms	0.479856	0.970627		0.73473	0.939721		0.748203	0.929634		0.534171	0.716548			1.43009	1.55098		1.55896	1.2484		2.0208	1.91246		3.34519	2.30946			1.37713	1.20334		3.00721	1.05502		3.07876	1.05481		2.60098	1.19118
1183 ms	0.479431	0.970234		0.733998	0.939334		0.747243	0.929253		0.533512	0.716173			1.42852	1.55061		1.55705	1.24811		2.01868	1.91184		3.34152	2.30866			1.37527	1.2043		3.00306	1.05548		3.0733	1.05489		2.59801	1.19254
1184 ms	0.478881	0.969911		0.733205	0.939229		0.746271	0.928747		0.532837	0.715772			1.42732	1.55042		1.55503	1.24793		2.01645	1.9114		3.3378	2.3079			1.37427	1.20415		2.99873	1.05506		3.0684	1.05534		2.59548	1.19381
1185 ms	0.478824	0.969477		0.732591	0.939005		0.745304	0.928396		0.532262	0.715461			1.4259	1.55008		1.55299	1.24771		2.01399	1.91065		3.33376	2.30747			1.37221	1.20504		2.99438	1.0553		3.06302	1.05572		2.59245	1.19492
1186 ms	0.478912	0.969398		0.731975	0.938712		0.744265	0.92789		0.531649	0.715183			1.42444	1.54993		1.55086	1.24767		2.01197	1.91001		3.32971	2.30733			1.37183	1.2049		2.98985	1.05543		3.05796	1.05554		2.5898	1.19614
1187 ms	0.478761	0.968764		0.731337	0.938381		0.743324	0.927624		0.531046	0.714881			1.42255	1.54914		1.54898	1.24732		2.00986	1.90963		3.32561	2.30702			1.37099	1.20452		2.98557	1.05542		3.05269	1.05639		2.58799	1.19628
1188 ms	0.478792	0.968498		0.730477	0.93797		0.742425	0.927156		0.530447	0.714537			1.42056	1.54919		1.54688	1.24712		2.00752	1.90922		3.32173	2.30653			1.36945	1.20414		2.9807	1.05582		3.04776	1.05675		2.58559	1.1967
1189 ms	0.478872	0.968135		0.729801	0.937399		0.741464	0.926759		0.529943	0.714309			1.41856	1.54862		1.54507	1.24688		2.00561	1.90881		3.31779	2.30623			1.36847	1.20436		2.9759	1.05529		3.04286	1.05643		2.58313	1.19758
1190 ms	0.478882	0.967732		0.729032	0.937124		0.740534	0.926324		0.529426	0.714025			1.41731	1.54779		1.54273	1.24678		2.00354	1.90822		3.31386	2.30575			1.36791	1.2045		2.97177	1.05481		3.03802	1.05645		2.58052	1.19845
1191 ms	0.478783	0.966961		0.728535	0.936685		0.739583	0.925871		0.528983	0.713782			1.41573	1.54645		1.54044	1.24645		2.00162	1.90761		3.30988	2.30527			1.36659	1.20487		2.96785	1.0547		3.03254	1.0563		2.57745	1.19882
1192 ms	0.47843	0.966592		0.727825	0.936023		0.738596	0.925527		0.528433	0.713446			1.41406	1.54562		1.53855	1.24602		1.99986	1.9071		3.30593	2.30469			1.36631	1.20427		2.96394	1.05388		3.02739	1.05631		2.5748	1.19892
1193 ms	0.477961	0.966316		0.727227	0.935739		0.737691	0.925219		0.527862	0.713072			1.41263	1.54486		1.53695	1.24559		1.9978	1.9066		3.30236	2.3038			1.36481	1.20372		2.96024	1.05311		3.02227	1.05646		2.57196	1.19923
1194 ms	0.477669	0.965929		0.726453	0.935352		0.73696	0.924845		0.527306	0.71277			1.41083	1.54409		1.53504	1.24531		1.99557	1.90602		3.2988	2.30317			1.36388	1.20364		2.95682	1.05238		3.01747	1.05639		2.56878	1.19971
1195 ms	0.477111	0.965769		0.725934	0.935076		0.73594	0.924494		0.526723	0.712514			1.40917	1.54297		1.53303	1.24504		1.99384	1.90556		3.29487	2.30248			1.36348	1.20361		2.95323	1.05094		3.01261	1.05611		2.5652	1.20022
1196 ms	0.476577	0.965816		0.725305	0.934858		0.735295	0.924128		0.526026	0.71205			1.40875	1.5415		1.53076	1.24465		1.99153	1.9047		3.29136	2.30173			1.36266	1.20318		2.94963	1.05082		3.00756	1.05648		2.56218	1.20046
1197 ms	0.476267	0.965605		0.724928	0.934521		0.734462	0.923788		0.525422	0.711715			1.40786	1.5402		1.52911	1.24438		1.98948	1.90406		3.28748	2.30117			1.36191	1.20267		2.9455	1.04992		3.00298	1.05626		2.55919	1.20063
1198 ms	0.475911	0.96581		0.724113	0.93419		0.733471	0.923401		0.524775	0.711527			1.40645	1.53863		1.52731	1.24401		1.98761	1.90365		3.28352	2.30061			1.36118	1.20223		2.94143	1.04841		2.99837	1.05626		2.55635	1.20134
1199 ms	0.475623	0.965354		0.723519	0.934102		0.732458	0.922971		0.524142	0.711236			1.40488	1.53738		1.52542	1.24389		1.98571	1.9031		3.27997	2.29987			1.35989	1.20146		2.93728	1.04765		2.99345	1.05595		2.55329	1.20243
1200 ms	0.475404	0.964848		0.722593	0.933793		0.731425	0.922508		0.523509	0.710842			1.40313	1.53586		1.52339	1.24359		1.984	1.90241		3.27614	2.29917			1.35902	1.20142		2.93327	1.04685		2.98872	1.05586		2.55044	1.20291
1201 ms	0.475364	0.964538		0.721987	0.933698		0.730301	0.922164		0.522892	0.710483			1.40235	1.53482		1.52142	1.24347		1.98234	1.90191		3.27243	2.29858			1.3572	1.20064		2.92883	1.04676		2.98393	1.05568		2.54736	1.20344
1202 ms	0.475224	0.964044		0.721199	0.933494		0.729425	0.921835		0.522235	0.709993			1.40103	1.53385		1.51958	1.24327		1.97984	1.90116		3.2687	2.2981			1.35658	1.20005		2.92499	1.04637		2.97965	1.05579		2.54527	1.20355
1203 ms	0.475213	0.963726		0.720351	0.933303		0.728501	0.921415		0.521594	0.709545			1.39874	1.53239		1.5177	1.24309		1.97805	1.90082		3.26479	2.29753			1.35539	1.19961		2.9211	1.0454		2.97501	1.05583		2.54213	1.20384
1204 ms	0.475359	0.963358		0.719423	0.933126		0.727545	0.920969		0.520952	0.70901			1.39696	1.53087		1.51577	1.24285		1.97625	1.90032		3.26114	2.29698			1.35387	1.19884		2.91745	1.04485		2.97023	1.05585		2.53956	1.204
1205 ms	0.475695	0.962896		0.718636	0.932919		0.726695	0.920545		0.520358	0.708391			1.39515	1.53048		1.51375	1.2429		1.97415	1.89962		3.25745	2.29678			1.35317	1.19787		2.91399	1.04485		2.9659	1.0564		2.53701	1.20424
1206 ms	0.476032	0.962921		0.717722	0.932545		0.725979	0.920104		0.51978	0.707905			1.39402	1.52957		1.51183	1.24272		1.97223	1.89885		3.2537	2.29655			1.35246	1.19756		2.91011	1.04487		2.96135	1.05595		2.53436	1.20421
1207 ms	0.476241	0.962627		0.716941	0.932201		0.725252	0.919719		0.519266	0.707544			1.3927	1.52885		1.51008	1.24263		1.97005	1.89842		3.24989	2.29649			1.35105	1.19668		2.90625	1.04463		2.95674	1.05602		2.53156	1.20486
1208 ms	0.476162	0.962699		0.716375	0.93186		0.724432	0.919098		0.518709	0.707115			1.39096	1.52781		1.50808	1.24251		1.968	1.89778		3.24604	2.2958			1.35105	1.19578		2.90297	1.04353		2.95221	1.0556		2.52874	1.20558
1209 ms	0.476039	0.962536		0.715735	0.931402		0.723781	0.918635		0.518172	0.706692			1.38934	1.52699		1.50577	1.24256		1.96654	1.89738		3.24239	2.29507			1.34875	1.19511		2.8988	1.04322		2.94737	1.05539		2.52548	1.20623
1210 ms	0.475829	0.96244		0.715172	0.93112		0.722779	0.918111		0.517605	0.70639			1.38732	1.5267		1.50375	1.24255		1.96471	1.89668		3.23866	2.29467			1.34722	1.19416		2.89511	1.04272		2.94278	1.05495		2.52237	1.20691
1211 ms	0.475414	0.962255		0.714662	0.930664		0.722102	0.917699		0.517036	0.706064			1.3866	1.5255		1.50145	1.24254		1.96288	1.89624		3.23485	2.29409			1.34658	1.19388		2.89076	1.0423		2.93781	1.05491		2.51941	1.20756
1212 ms	0.475067	0.962377		0.714146	0.930137		0.72132	0.917283		0.516379	0.705609			1.38663	1.5232		1.49953	1.24222		1.96096	1.89589		3.23134	2.29311			1.34535	1.19323		2.88664	1.04215		2.93277	1.05406		2.51644	1.20796
1213 ms	0.474665	0.962159		0.713728	0.929791		0.720456	0.916829		0.515731	0.705172			1.38616	1.52193		1.49754	1.24226		1.95889	1.89566		3.22774	2.29233			1.34361	1.19257		2.88278	1.042		2.92819	1.05424		2.51334	1.20799
1214 ms	0.47444	0.962382		0.713278	0.929476		0.719465	0.91641		0.515097	0.704748			1.38551	1.52064		1.49549	1.24239		1.95709	1.8949		3.2244	2.29178			1.34252	1.19192		2.87955	1.04161		2.92317	1.05391		2.51045	1.20772
1215 ms	0.474307	0.961945		0.712592	0.928984		0.718518	0.915959		0.514456	0.704146			1.38509	1.52001		1.4936	1.24227		1.95524	1.89427		3.22086	2.29135			1.34035	1.19151		2.87572	1.04165		2.9182	1.05369		2.50745	1.2076
1216 ms	0.47458	0.962218		0.711862	0.928755		0.717354	0.915501		0.513899	0.703715			1.38423	1.51869		1.49192	1.2422		1.95312	1.89391		3.21726	2.29105			1.3395	1.19124		2.87201	1.04165		2.9131	1.05339		2.50434	1.20784
1217 ms	0.474471	0.961606		0.711351	0.928265		0.716349	0.915017		0.513319	0.703199			1.38277	1.51885		1.49008	1.24216		1.95128	1.89346		3.21344	2.29068			1.33887	1.19033		2.86841	1.04112		2.90828	1.0524		2.50223	1.20749
1218 ms	0.474675	0.961554		0.710545	0.927947		0.715436	0.914636		0.51274	0.702821			1.38045	1.51814		1.48842	1.24217		1.94923	1.89274		3.20987	2.29024			1.33706	1.18912		2.86491	1.04099		2.90371	1.05165		2.49922	1.20737
1219 ms	0.47479	0.960766		0.709766	0.9278		0.714425	0.91421		0.512193	0.702362			1.37773	1.51847		1.48688	1.24238		1.94736	1.89186		3.20639	2.28963			1.33532	1.18851		2.8616	1.04042		2.89892	1.0513		2.4959	1.20766
1220 ms	0.47494	0.960458		0.708925	0.927559		0.713548	0.913796		0.511663	0.702011			1.37557	1.51874		1.48502	1.24223		1.9457	1.89137		3.20281	2.28933			1.33424	1.18804		2.85819	1.03969		2.89383	1.05095		2.49355	1.20829
1221 ms	0.474991	0.960082		0.708106	0.927289		0.712823	0.913306		0.511105	0.701582			1.37345	1.51881		1.4831	1.24212		1.94356	1.89092		3.19896	2.28865			1.33326	1.18701		2.85434	1.03905		2.88964	1.05053		2.49062	1.20835
1222 ms	0.475235	0.959907		0.707215	0.926898		0.71204	0.912973		0.510591	0.701291			1.37221	1.51798		1.48149	1.24227		1.94182	1.89023		3.19525	2.28789			1.33202	1.18594		2.85103	1.03851		2.88486	1.05026		2.48769	1.20855
1223 ms	0.474794	0.958991		0.706617	0.926577		0.711201	0.912453		0.510039	0.701011			1.37031	1.51845		1.47962	1.24211		1.94003	1.8895		3.19159	2.28748			1.33094	1.18486		2.84714	1.03783		2.88026	1.0493		2.48499	1.2088
1224 ms	0.474992	0.959127		0.705733	0.926182		0.710473	0.912003		0.509524	0.700634			1.36926	1.51721		1.4778	1.24222		1.93773	1.88911		3.18805	2.2869			1.32941	1.18389		2.84323	1.0378		2.87561	1.04986		2.48168	1.20913
1225 ms	0.474767	0.959083		0.704867	0.925788		0.709535	0.911549		0.508964	0.70016			1.36779	1.51715		1.47595	1.24205		1.93596	1.88844		3.18443	2.28634			1.32758	1.18321		2.83954	1.03803		2.87058	1.04969		2.47905	1.20943
1226 ms	0.474118	0.958834		0.704387	0.925213		0.70871	0.911129		0.508422	0.699871			1.36591	1.51696		1.47391	1.24191		1.93417	1.88802		3.18052	2.28618			1.32584	1.18175		2.83548	1.03758		2.86613	1.04932		2.47647	1.20937
1227 ms	0.473757	0.959035		0.703725	0.924865		0.707787	0.910688		0.507905	0.699562			1.36446	1.51568		1.47211	1.24183		1.93227	1.8872		3.17711	2.28574			1.32409	1.18032		2.83047	1.03963		2.86152	1.04907		2.47348	1.20938
1228 ms	0.473127	0.958384		0.702958	0.924195		0.706931	0.910303		0.507377	0.699202			1.36339	1.5147		1.47047	1.24182		1.93039	1.88649		3.17368	2.28514			1.32158	1.17937		2.8258	1.04086		2.85629	1.04864		2.47036	1.20969
1229 ms	0.472071	0.958094		0.702338	0.923997		0.706166	0.909852		0.506865	0.698942			1.36084	1.51365		1.46869	1.2419		1.92841	1.88609		3.17041	2.2849			1.32009	1.17875		2.82061	1.04156		2.85129	1.0484		2.46743	1.2101
1230 ms	0.4718	0.95811		0.701557	0.923487		0.70529	0.909595		0.506353	0.698535			1.35994	1.51208		1.4671	1.24209		1.92674	1.88554		3.16698	2.28419			1.3191	1.1773		2.81683	1.04176		2.84701	1.04862		2.46455	1.21048
1231 ms	0.471075	0.957238		0.700931	0.923142		0.704363	0.909373		0.505838	0.698221			1.3587	1.51084		1.46552	1.24209		1.92524	1.8849		3.16372	2.28336			1.31706	1.17631		2.81287	1.04209		2.84219	1.04832		2.4619	1.2105
1232 ms	0.470671	0.956882		0.700447	0.922907		0.703445	0.909044		0.50529	0.697968			1.35729	1.50959		1.46394	1.24229		1.92342	1.88436		3.16038	2.28294			1.31568	1.17525		2.80873	1.04186		2.83773	1.04815		2.45874	1.21066
1233 ms	0.470723	0.956575		0.699534	0.922717		0.70255	0.908762		0.504747	0.697654			1.35638	1.50814		1.46235	1.24238		1.92155	1.88368		3.15704	2.28226			1.31464	1.17436		2.80487	1.04141		2.83306	1.04805		2.45615	1.21118
1234 ms	0.47059	0.955931		0.698767	0.922451		0.701675	0.908585		0.504209	0.697269			1.35457	1.50756		1.4605	1.24255		1.91974	1.88317		3.15334	2.28178			1.31278	1.17383		2.80237	1.03847		2.82836	1.04814		2.45342	1.21178
1235 ms	0.470533	0.955694		0.698305	0.922442		0.700745	0.908367		0.503695	0.697155			1.35216	1.50649		1.45837	1.24276		1.91806	1.88265		3.14963	2.28134			1.31159	1.17338		2.7994	1.03674		2.82417	1.0485		2.45103	1.21203
1236 ms	0.47108	0.955813		0.697806	0.921942		0.699806	0.908136		0.503201	0.69691			1.35141	1.50593		1.45663	1.24265		1.91618	1.88197		3.14589	2.28071			1.31023	1.17222		2.79648	1.03575		2.81972	1.04872		2.44907	1.21193
1237 ms	0.471313	0.955715		0.69733	0.921514		0.699074	0.907753		0.502659	0.696555			1.35011	1.50479		1.45509	1.24282		1.91419	1.88096		3.14228	2.28017			1.30762	1.17163		2.79276	1.03508		2.81502	1.0493		2.4466	1.21202
1238 ms	0.47085	0.955758		0.696765	0.921201		0.698226	0.907352		0.502058	0.696267			1.3484	1.50398		1.45343	1.24283		1.91243	1.88014		3.13848	2.28002			1.30647	1.17137		2.78939	1.03399		2.81013	1.05002		2.44445	1.21218
1239 ms	0.470555	0.955828		0.696181	0.920831		0.69732	0.907002		0.501551	0.696006			1.34771	1.50342		1.45147	1.24284		1.91056	1.87931		3.13486	2.2795			1.30551	1.17022		2.78589	1.03323		2.80595	1.05022		2.44234	1.21232
1240 ms	0.470103	0.955602		0.695514	0.920182		0.696555	0.906747		0.501066	0.695753			1.34658	1.50226		1.44977	1.24287		1.90856	1.87867		3.13135	2.27913			1.3043	1.17006		2.78232	1.03317		2.80149	1.05029		2.43983	1.21225
1241 ms	0.469383	0.955805		0.695007	0.919815		0.695727	0.906363		0.500518	0.695451			1.34614	1.50083		1.44841	1.2427		1.90666	1.87782		3.1277	2.27829			1.30318	1.16976		2.7783	1.03295		2.79744	1.05038		2.43728	1.21202
1242 ms	0.469185	0.955758		0.694437	0.919327		0.695028	0.906094		0.500084	0.695058			1.34522	1.49973		1.44717	1.24249		1.90483	1.87679		3.12434	2.27756			1.30209	1.16922		2.77416	1.03275		2.79293	1.04985		2.43478	1.21232
1243 ms	0.468232	0.955519		0.693723	0.919082		0.694217	0.905761		0.499529	0.694741			1.34352	1.49837		1.44535	1.24243		1.90321	1.87619		3.12063	2.27711			1.30092	1.16909		2.77055	1.0326		2.78883	1.05012		2.43188	1.21273
1244 ms	0.467391	0.955284		0.692933	0.918947		0.693427	0.905661		0.499085	0.694688			1.34194	1.49758		1.44353	1.24219		1.90143	1.87557		3.11696	2.27663			1.30004	1.16929		2.76709	1.03291		2.78425	1.05024		2.42918	1.21297
1245 ms	0.467277	0.95555		0.692254	0.918673		0.692598	0.905272		0.498706	0.694504			1.34089	1.4967		1.44157	1.24206		1.89936	1.87467		3.1136	2.27601			1.29877	1.16892		2.76345	1.03332		2.78044	1.04977		2.42683	1.21334
1246 ms	0.46684	0.955161		0.691604	0.91826		0.691892	0.905076		0.498273	0.69429			1.33938	1.49576		1.43992	1.24221		1.89742	1.87432		3.11021	2.27528			1.29726	1.16995		2.76024	1.03334		2.77574	1.04995		2.42447	1.21375
1247 ms	0.46635	0.955381		0.691193	0.918174		0.691151	0.904663		0.497833	0.694207			1.33795	1.495		1.43847	1.24234		1.89577	1.87335		3.10663	2.27446			1.29603	1.1701		2.75691	1.03391		2.77171	1.04996		2.42183	1.21422
1248 ms	0.466103	0.9552		0.690533	0.91784		0.690378	0.904263		0.497471	0.694157			1.33616	1.4943		1.43666	1.2424		1.89388	1.8726		3.10302	2.27384			1.29502	1.16952		2.75362	1.03374		2.76723	1.05003		2.41935	1.21445
1249 ms	0.465729	0.955358		0.689782	0.917579		0.689509	0.903847		0.496998	0.694136			1.33536	1.493		1.43502	1.24243		1.892	1.8721		3.09953	2.27331			1.29408	1.16939		2.75024	1.03416		2.76265	1.0506		2.41744	1.21435
1250 ms	0.465653	0.955061		0.689174	0.917183		0.688655	0.903476		0.496594	0.694061			1.33461	1.49273		1.43367	1.24259		1.88999	1.87124		3.09612	2.27254			1.29219	1.16932		2.74686	1.03409		2.75846	1.05053		2.41519	1.21449
1251 ms	0.46557	0.95508		0.68859	0.91681		0.687905	0.902986		0.49608	0.693828			1.33372	1.4927		1.43211	1.24269		1.88822	1.87049		3.0929	2.27171			1.29084	1.16905		2.74409	1.03415		2.75412	1.05049		2.41321	1.21426
1252 ms	0.465356	0.95487		0.687931	0.91639		0.687206	0.902767		0.495557	0.693631			1.33305	1.49195		1.43075	1.24271		1.88652	1.86986		3.08926	2.27107			1.2902	1.16861		2.74077	1.03389		2.74968	1.05039		2.41026	1.21465
1253 ms	0.465423	0.954781		0.687499	0.915995		0.686525	0.902195		0.495084	0.693387			1.33202	1.49108		1.42963	1.24253		1.88465	1.86889		3.08549	2.27062			1.28909	1.16812		2.73879	1.03255		2.74551	1.05044		2.40756	1.21471
1254 ms	0.465614	0.954662		0.686824	0.915694		0.685654	0.901632		0.494628	0.693055			1.33113	1.4907		1.42789	1.24222		1.88265	1.86841		3.08184	2.2701			1.28809	1.16795		2.73641	1.03085		2.74102	1.05075		2.40582	1.21472
1255 ms	0.465627	0.954683		0.68611	0.915194		0.68506	0.901207		0.494085	0.692805			1.33016	1.49017		1.4263	1.24215		1.88086	1.8678		3.07835	2.26943			1.28729	1.1679		2.73379	1.0305		2.73676	1.05065		2.40327	1.21491
1256 ms	0.465535	0.954283		0.685489	0.914738		0.684347	0.900747		0.493575	0.692541			1.32987	1.49031		1.42459	1.24204		1.87906	1.86722		3.07477	2.26877			1.28582	1.16772		2.73141	1.02965		2.73266	1.05034		2.40057	1.21536
1257 ms	0.465656	0.954602		0.684706	0.914504		0.683636	0.900342		0.493143	0.692375			1.32904	1.48984		1.42287	1.24175		1.87741	1.86651		3.07122	2.26807			1.28575	1.16748		2.72861	1.02926		2.72871	1.0504		2.39839	1.21551
1258 ms	0.465588	0.954358		0.684069	0.914132		0.682702	0.899817		0.492797	0.692373			1.32804	1.49003		1.42119	1.24147		1.87577	1.86592		3.06764	2.26721			1.28538	1.16729		2.72519	1.02881		2.72476	1.05063		2.39605	1.2158
1259 ms	0.465761	0.954294		0.683572	0.913742		0.681903	0.899423		0.492451	0.69231			1.32735	1.48998		1.41969	1.24134		1.8741	1.86526		3.06418	2.26643			1.28489	1.16762		2.7225	1.02855		2.72044	1.05093		2.39407	1.21589
1260 ms	0.465459	0.953858		0.682659	0.913321		0.681088	0.899117		0.492079	0.692226			1.32649	1.49003		1.41765	1.24135		1.87231	1.86479		3.06072	2.26533			1.28421	1.16781		2.7183	1.0291		2.71654	1.0512		2.39194	1.21655
1261 ms	0.465267	0.953832		0.681982	0.912803		0.680445	0.898968		0.491744	0.692201			1.32635	1.48975		1.41602	1.24143		1.87072	1.86402		3.05731	2.26429			1.28341	1.16776		2.71424	1.03055		2.71228	1.05114		2.38954	1.21655
1262 ms	0.464905	0.953514		0.681384	0.912354		0.679544	0.898672		0.491395	0.692145			1.32621	1.48957		1.41443	1.24145		1.86882	1.86311		3.05377	2.26337			1.28247	1.16772		2.71019	1.03183		2.70872	1.05132		2.38755	1.21657
1263 ms	0.464618	0.953901		0.68075	0.911888		0.678806	0.898377		0.490984	0.691941			1.3246	1.4898		1.41265	1.2416		1.86692	1.86231		3.05023	2.26244			1.28214	1.16742		2.70697	1.03265		2.70492	1.05116		2.38502	1.21697
1264 ms	0.464043	0.953542		0.680306	0.911292		0.678083	0.898057		0.490546	0.691759			1.3244	1.48908		1.41122	1.24151		1.86504	1.86181		3.04681	2.26162			1.28093	1.16844		2.70387	1.0325		2.70066	1.05076		2.38271	1.21739
1265 ms	0.463638	0.953608		0.67989	0.910695		0.677394	0.89777		0.490079	0.691471			1.32397	1.48762		1.40949	1.24155		1.86331	1.86109		3.04318	2.26088			1.27943	1.16917		2.70099	1.03256		2.69639	1.05004		2.38072	1.21731
1266 ms	0.463154	0.953534		0.679216	0.910302		0.676673	0.897341		0.489671	0.691283			1.32268	1.48695		1.4077	1.24173		1.86144	1.86057		3.03991	2.25966			1.27807	1.16931		2.69784	1.03222		2.69248	1.04994		2.3786	1.21724
1267 ms	0.462951	0.953937		0.678794	0.91003		0.675995	0.896872		0.489295	0.691271			1.32234	1.48639		1.40638	1.24155		1.85981	1.85965		3.03657	2.25861			1.27738	1.16981		2.69518	1.03174		2.68852	1.04976		2.37645	1.2171
1268 ms	0.462443	0.953755		0.678345	0.90963		0.675323	0.896449		0.488777	0.691174			1.32129	1.48581		1.4046	1.24141		1.85828	1.85915		3.03327	2.25753			1.27594	1.16983		2.69267	1.03083		2.68463	1.05001		2.37412	1.21721
1269 ms	0.462492	0.953849		0.678012	0.90924		0.674639	0.896098		0.488302	0.690936			1.32045	1.48494		1.40315	1.24139		1.85682	1.85881		3.02992	2.2568			1.27524	1.17032		2.69016	1.02975		2.68033	1.04988		2.37228	1.21739
1270 ms	0.46217	0.953299		0.677598	0.908786		0.673948	0.895683		0.487931	0.690904			1.32037	1.48403		1.40196	1.2414		1.8555	1.85827		3.02656	2.25577			1.27431	1.17208		2.68717	1.02878		2.676	1.05055		2.37049	1.21711
1271 ms	0.462319	0.953335		0.677137	0.908519		0.673295	0.895262		0.487539	0.690789			1.31874	1.48332		1.40028	1.24142		1.85402	1.85751		3.02296	2.25463			1.27409	1.172		2.68443	1.02866		2.6723	1.05065		2.36844	1.21732
1272 ms	0.462342	0.952937		0.676522	0.908372		0.672655	0.894789		0.487163	0.690621			1.31852	1.48281		1.39861	1.24151		1.85239	1.85694		3.01958	2.25363			1.27333	1.17216		2.68164	1.02786		2.66882	1.05095		2.36616	1.21807
1273 ms	0.462563	0.952933		0.676019	0.907933		0.671975	0.894379		0.486823	0.690585			1.31814	1.48252		1.39723	1.24126		1.85077	1.85616		3.01612	2.25292			1.27234	1.17329		2.67896	1.02802		2.66504	1.05116		2.3646	1.21871
1274 ms	0.462663	0.952565		0.675348	0.907391		0.671111	0.893956		0.486499	0.690426			1.31675	1.48149		1.39577	1.24123		1.84926	1.8558		3.01261	2.25227			1.27129	1.17418		2.67536	1.02881		2.66098	1.05117		2.36276	1.21917
1275 ms	0.462655	0.952571		0.674568	0.90713		0.670327	0.893711		0.486225	0.690269			1.31597	1.48069		1.39459	1.24145		1.84732	1.8551		3.00896	2.25165			1.27071	1.17518		2.672	1.02859		2.65759	1.05091		2.3608	1.21964
1276 ms	0.46247	0.95215		0.673865	0.906732		0.669511	0.893244		0.485974	0.690292			1.31479	1.48001		1.39295	1.24133		1.84573	1.85442		3.00561	2.25071			1.26992	1.17612		2.66947	1.0285		2.6538	1.051		2.35866	1.22027
1277 ms	0.462359	0.952374		0.673144	0.906473		0.668605	0.892971		0.485639	0.690215			1.31384	1.47937		1.39137	1.2411		1.84382	1.85379		3.00211	2.25003			1.26987	1.1762		2.66662	1.02844		2.6502	1.05138		2.35681	1.22088
1278 ms	0.46173	0.952016		0.672416	0.906119		0.667797	0.89278		0.485264	0.690155			1.31387	1.47855		1.39001	1.2412		1.8424	1.85312		2.99887	2.24934			1.26883	1.17657		2.66343	1.02812		2.64644	1.05117		2.35469	1.22129
1279 ms	0.461337	0.951808		0.671799	0.905713		0.667017	0.892655		0.484918	0.69023			1.31239	1.47732		1.3889	1.24095		1.84056	1.85242		2.99544	2.24852			1.26838	1.17729		2.66071	1.02855		2.6426	1.05149		2.35328	1.22143
1280 ms	0.460747	0.951694		0.671335	0.905553		0.666442	0.892533		0.484442	0.690128			1.3123	1.47646		1.38732	1.24088		1.83908	1.85182		2.99173	2.24777			1.26753	1.17786		2.65747	1.02831		2.63867	1.05202		2.35079	1.22203
1281 ms	0.460197	0.951415		0.670854	0.905181		0.665823	0.892589		0.483945	0.690004			1.31165	1.47635		1.38534	1.241		1.8374	1.85074		2.98826	2.24698			1.26708	1.17777		2.65507	1.02812		2.6349	1.05236		2.34916	1.22238
1282 ms	0.459997	0.951488		0.67048	0.904802		0.665114	0.892235		0.483481	0.689973			1.31117	1.4758		1.38355	1.24086		1.83564	1.85002		2.98489	2.24624			1.26644	1.17806		2.65229	1.02804		2.63067	1.05303		2.34705	1.22302
1283 ms	0.459523	0.951514		0.669787	0.904438		0.664653	0.891991		0.482952	0.689846			1.31049	1.47533		1.38194	1.24081		1.8338	1.84936		2.98139	2.24558			1.26521	1.17829		2.64868	1.0278		2.62704	1.05332		2.34477	1.22375
1284 ms	0.459301	0.951534		0.669191	0.90422		0.664083	0.891518		0.482409	0.689712			1.3096	1.47464		1.3804	1.24069		1.83249	1.8484		2.97795	2.24468			1.26383	1.1787		2.64529	1.028		2.62326	1.0534		2.34283	1.22397
1285 ms	0.459279	0.951479		0.668487	0.903785		0.663607	0.891119		0.481865	0.689607			1.30838	1.4745		1.37859	1.24039		1.83044	1.8477		2.97459	2.24404			1.263	1.17874		2.64239	1.02742		2.61952	1.05383		2.3409	1.2242
1286 ms	0.459223	0.951621		0.667788	0.903401		0.663226	0.890875		0.481343	0.689467			1.30828	1.47439		1.37715	1.24041		1.82885	1.84706		2.97128	2.24339			1.26182	1.17936		2.63913	1.02655		2.61578	1.05415		2.33824	1.22461
1287 ms	0.459412	0.951608		0.666977	0.902918		0.662633	0.890588		0.48092	0.689382			1.30728	1.47378		1.37558	1.24071		1.82688	1.84635		2.96838	2.24238			1.26113	1.17878		2.63593	1.02602		2.61243	1.05386		2.33612	1.22474
1288 ms	0.459607	0.952025		0.66629	0.902745		0.662031	0.890178		0.480437	0.689326			1.30717	1.47323		1.3748	1.24052		1.82533	1.8457		2.96509	2.24131			1.25979	1.17834		2.63256	1.02529		2.60893	1.05363		2.33355	1.22439
1289 ms	0.459647	0.951785		0.665589	0.902373		0.66149	0.88992		0.480013	0.68923			1.30675	1.47295		1.37329	1.24039		1.82385	1.84502		2.96183	2.24034			1.25876	1.1783		2.62885	1.02543		2.60545	1.05349		2.33154	1.22446
1290 ms	0.460045	0.951931		0.664911	0.902206		0.660867	0.889858		0.479633	0.68918			1.30642	1.47307		1.37198	1.24035		1.82227	1.84438		2.95882	2.23934			1.25749	1.1787		2.62625	1.02516		2.6014	1.0537		2.32986	1.22417
1291 ms	0.460281	0.951651		0.664326	0.901768		0.660222	0.889682		0.479305	0.689056			1.30617	1.47253		1.37045	1.24047		1.82027	1.8439		2.95559	2.23857			1.25652	1.17805		2.62354	1.02468		2.59753	1.05372		2.32762	1.22444
1292 ms	0.460365	0.951961		0.663799	0.901498		0.65946	0.889404		0.479024	0.688975			1.30556	1.4721		1.36906	1.24075		1.81885	1.84318		2.95244	2.23744			1.25483	1.179		2.62054	1.02562		2.59344	1.05429		2.32582	1.22479
1293 ms	0.460425	0.952183		0.663201	0.901184		0.658698	0.888953		0.478671	0.688774			1.30531	1.47179		1.36781	1.24084		1.81716	1.84244		2.94948	2.23633			1.25388	1.17853		2.61753	1.02546		2.58954	1.05399		2.32384	1.22475
1294 ms	0.460132	0.952106		0.662616	0.901056		0.657817	0.888595		0.478315	0.688576			1.30478	1.4712		1.36641	1.24059		1.81561	1.8416		2.94616	2.23561			1.25273	1.17871		2.61501	1.02572		2.58562	1.05409		2.32191	1.22476
1295 ms	0.459855	0.952048		0.661999	0.900705		0.65716	0.888246		0.477982	0.688375			1.30394	1.4708		1.36452	1.24069		1.81377	1.84122		2.94323	2.23481			1.25127	1.17933		2.61189	1.02607		2.58127	1.05506		2.32005	1.22555
1296 ms	0.459294	0.952294		0.661482	0.900529		0.656528	0.888018		0.47757	0.688267			1.30317	1.4703		1.36354	1.24073		1.81214	1.8406		2.94018	2.23394			1.24966	1.1794		2.60963	1.02597		2.57767	1.05492		2.31836	1.22556
1297 ms	0.458927	0.95209		0.66096	0.900233		0.655877	0.887722		0.477212	0.688144			1.30302	1.46909		1.3619	1.24078		1.81054	1.83975		2.93692	2.23299			1.24907	1.17894		2.60663	1.02604		2.57392	1.05472		2.31616	1.22599
1298 ms	0.458646	0.952473		0.6603	0.900022		0.655278	0.887535		0.476856	0.688174			1.30227	1.46856		1.36042	1.24071		1.80928	1.83915		2.934	2.23198			1.24807	1.17909		2.60431	1.0258		2.57036	1.05488		2.31427	1.22627
1299 ms	0.458462	0.952202		0.659672	0.899697		0.654664	0.887281		0.476451	0.688033			1.30163	1.46842		1.35917	1.24044		1.80755	1.83847		2.93085	2.23111			1.24728	1.17834		2.60129	1.0252		2.56699	1.05455		2.31193	1.2261
1300 ms	0.458198	0.952183		0.659035	0.899627		0.653954	0.887011		0.475973	0.687902			1.30035	1.46806		1.35761	1.24018		1.80577	1.83787		2.92768	2.23057			1.24633	1.17766		2.59859	1.02593		2.56355	1.05454		2.30973	1.22658
1301 ms	0.458008	0.952224		0.658564	0.899199		0.653447	0.886694		0.475477	0.687819			1.29956	1.46764		1.3561	1.24003		1.80422	1.83738		2.9244	2.22988			1.24515	1.1774		2.59568	1.02592		2.56003	1.05466		2.3074	1.22659
1302 ms	0.458168	0.95227		0.658051	0.898959		0.652754	0.886316		0.474969	0.687608			1.29951	1.46598		1.35488	1.23972		1.80271	1.8366		2.92108	2.22901			1.24388	1.17703		2.59361	1.02573		2.55653	1.05377		2.30541	1.22654
1303 ms	0.458718	0.952312		0.657193	0.898498		0.652156	0.885824		0.474456	0.68719			1.29863	1.46541		1.35307	1.23959		1.80116	1.83583		2.91798	2.22815			1.24286	1.17664		2.59068	1.02592		2.55274	1.05356		2.30279	1.22673
1304 ms	0.459114	0.952396		0.656659	0.898315		0.651491	0.885385		0.473925	0.686765			1.29719	1.46493		1.35192	1.23936		1.79957	1.83554		2.91502	2.22722			1.24084	1.17663		2.5878	1.02641		2.54902	1.05347		2.30057	1.22646
1305 ms	0.459485	0.952089		0.656046	0.897916		0.650983	0.885058		0.473411	0.686372			1.29662	1.46401		1.3507	1.23933		1.79773	1.83478		2.91188	2.22655			1.23917	1.17663		2.58453	1.02698		2.54518	1.05305		2.29786	1.22673
1306 ms	0.460081	0.952157		0.655476	0.897913		0.650353	0.884735		0.473037	0.686147			1.29596	1.46282		1.34901	1.2393		1.79598	1.83414		2.90883	2.22587			1.23859	1.17621		2.58187	1.02774		2.54154	1.05253		2.29575	1.22623
1307 ms	0.459995	0.95189		0.654984	0.897279		0.649788	0.884454		0.472623	0.68594			1.29537	1.46206		1.34741	1.23919		1.79461	1.83349		2.90585	2.22478			1.23731	1.17664		2.57837	1.02788		2.53771	1.05207		2.29397	1.22587
1308 ms	0.460246	0.951782		0.654278	0.896879		0.649116	0.884048		0.472239	0.685591			1.29566	1.46144		1.34625	1.23913		1.79302	1.83272		2.90297	2.22369			1.23591	1.17665		2.57574	1.02788		2.53431	1.05167		2.29233	1.22553
1309 ms	0.459888	0.951345		0.653639	0.896611		0.648529	0.883829		0.471875	0.685343			1.29445	1.46157		1.34489	1.23891		1.7912	1.83205		2.89987	2.22306			1.23546	1.17682		2.57278	1.02786		2.53133	1.05192		2.2903	1.22487
1310 ms	0.459818	0.951002		0.653383	0.896387		0.647767	0.883606		0.471581	0.685183			1.29409	1.46088		1.34368	1.2388		1.78955	1.83145		2.89665	2.22222			1.23426	1.17681		2.57012	1.02801		2.52772	1.05215		2.28871	1.22471
1311 ms	0.459086	0.950844		0.652725	0.895912		0.646926	0.883212		0.471273	0.684946			1.29441	1.4599		1.34235	1.23866		1.78798	1.83043		2.89341	2.22153			1.23382	1.1763		2.56749	1.02854		2.52446	1.05239		2.2868	1.22417
1312 ms	0.458529	0.95106		0.652203	0.895811		0.646306	0.882859		0.470918	0.684669			1.29426	1.45968		1.34066	1.23838		1.78643	1.82979		2.89036	2.22048			1.2332	1.17631		2.56478	1.02856		2.52115	1.0524		2.28529	1.22344
1313 ms	0.457717	0.95096		0.651446	0.895381		0.645624	0.882482		0.470407	0.684241			1.29395	1.45981		1.33927	1.23823		1.78473	1.82925		2.88714	2.21971			1.23206	1.17617		2.56199	1.02796		2.5177	1.05305		2.28322	1.2239
1314 ms	0.457493	0.95124		0.650879	0.895362		0.645134	0.882232		0.470019	0.683893			1.29389	1.45917		1.33792	1.23817		1.78301	1.82859		2.88393	2.21892			1.23123	1.17589		2.5601	1.02721		2.51462	1.0536		2.28121	1.22355
1315 ms	0.456924	0.95116		0.650242	0.895136		0.644375	0.881994		0.469601	0.683663			1.29228	1.45896		1.33638	1.23806		1.78163	1.82805		2.88101	2.2183			1.23077	1.17557		2.55789	1.02721		2.51087	1.05374		2.27943	1.22349
1316 ms	0.456995	0.951335		0.649704	0.895047		0.643652	0.881598		0.469198	0.683359			1.29217	1.45932		1.3348	1.23813		1.7803	1.82739		2.87819	2.21739			1.22915	1.17521		2.5556	1.02721		2.5067	1.05361		2.2771	1.22377
1317 ms	0.456745	0.951314		0.648877	0.894843		0.643078	0.881182		0.468742	0.683043			1.29229	1.45981		1.33331	1.23801		1.77914	1.8269		2.87531	2.2167			1.2287	1.17503		2.55352	1.02662		2.50332	1.05364		2.2749	1.22306
1318 ms	0.456854	0.951087		0.648361	0.894525		0.642707	0.880915		0.468215	0.682769			1.29221	1.46045		1.33192	1.2379		1.77755	1.82637		2.87218	2.21577			1.22776	1.17506		2.55153	1.02573		2.50053	1.05328		2.2726	1.22313
1319 ms	0.456896	0.950828		0.647804	0.894089		0.64188	0.880563		0.467743	0.682467			1.2919	1.46127		1.33061	1.23772		1.77633	1.82584		2.86904	2.21531			1.22659	1.17464		2.5487	1.02567		2.49703	1.05322		2.27056	1.22301
1320 ms	0.457088	0.950667		0.647254	0.893816		0.641266	0.880146		0.467346	0.682256			1.29159	1.46146		1.32965	1.23773		1.77521	1.82544		2.86616	2.21443			1.22488	1.17505		2.54603	1.02612		2.49351	1.05312		2.26893	1.22247
1321 ms	0.45783	0.950422		0.646564	0.893572		0.640534	0.879803		0.466951	0.681992			1.29125	1.46198		1.32825	1.23759		1.77372	1.82473		2.86333	2.21353			1.22418	1.17548		2.54351	1.02649		2.48995	1.05267		2.26683	1.22227
1322 ms	0.458303	0.950245		0.646166	0.893557		0.640037	0.879374		0.466544	0.681675			1.29147	1.46321		1.32699	1.23735		1.77211	1.82441		2.86017	2.21255			1.2237	1.17523		2.53993	1.02649		2.48662	1.0529		2.26428	1.22201
1323 ms	0.458788	0.949939		0.645676	0.893241		0.639602	0.879132		0.466193	0.681358			1.29159	1.46363		1.32564	1.237		1.77063	1.82383		2.85708	2.21176			1.22397	1.17499		2.53663	1.02647		2.48382	1.05249		2.26304	1.22162
1324 ms	0.458873	0.950064		0.645385	0.893164		0.638838	0.878658		0.46579	0.681025			1.29123	1.46359		1.32414	1.2368		1.76867	1.82325		2.85415	2.21071			1.22259	1.17548		2.5338	1.027		2.48043	1.05249		2.26083	1.22224
1325 ms	0.459233	0.949848		0.644994	0.893053		0.638098	0.87847		0.465604	0.680837			1.29045	1.46431		1.3226	1.23663		1.76743	1.82285		2.85116	2.21026			1.22195	1.1758		2.53035	1.02716		2.47653	1.05221		2.25878	1.22236
1326 ms	0.459035	0.949863		0.644392	0.892978		0.637571	0.878285		0.465365	0.680591			1.2913	1.46453		1.32091	1.23654		1.7657	1.82236		2.84805	2.20927			1.22078	1.1758		2.52837	1.02731		2.47337	1.05223		2.25705	1.22234
1327 ms	0.459147	0.949584		0.644012	0.892678		0.636901	0.87809		0.465073	0.680333			1.2921	1.46453		1.31897	1.2363		1.76406	1.82159		2.84509	2.2084			1.2205	1.17559		2.5257	1.0271		2.46986	1.05234		2.25499	1.22227
1328 ms	0.458199	0.949592		0.643697	0.892429		0.636136	0.877754		0.464772	0.680198			1.29246	1.46524		1.31731	1.23594		1.76245	1.82123		2.84214	2.20759			1.21965	1.17514		2.52309	1.02723		2.46664	1.05252		2.25295	1.22256
1329 ms	0.457973	0.949382		0.643048	0.892015		0.635586	0.877777		0.464589	0.68006			1.29256	1.46495		1.31582	1.23569		1.76074	1.82046		2.83932	2.20689			1.218	1.17552		2.52108	1.02759		2.46333	1.05286		2.25127	1.22259
1330 ms	0.457097	0.949392		0.642641	0.891837		0.634874	0.8774		0.464288	0.680079			1.29336	1.4654		1.31467	1.2358		1.75919	1.81967		2.83665	2.20627			1.21608	1.17537		2.5187	1.02813		2.45995	1.05359		2.24868	1.22253
1331 ms	0.456994	0.949142		0.641952	0.891411		0.634251	0.877283		0.464084	0.680116			1.29321	1.46675		1.31353	1.23567		1.75778	1.81884		2.83374	2.20568			1.21572	1.17502		2.51565	1.02786		2.4567	1.05296		2.24667	1.22213
1332 ms	0.456621	0.949298		0.641268	0.891282		0.633689	0.876959		0.463697	0.680051			1.29271	1.46787		1.31207	1.23566		1.75612	1.81819		2.83103	2.20466			1.21532	1.17385		2.51349	1.02758		2.45366	1.05373		2.24474	1.2217
1333 ms	0.456664	0.949133		0.640851	0.891108		0.633106	0.876767		0.463363	0.680076			1.29173	1.46888		1.31119	1.23534		1.75453	1.81748		2.8284	2.20404			1.21491	1.17366		2.51091	1.02686		2.45076	1.05438		2.24244	1.22138
1334 ms	0.456538	0.9494		0.640302	0.890943		0.632534	0.876632		0.463038	0.680107			1.2914	1.47075		1.31023	1.23521		1.75285	1.81704		2.8255	2.2034			1.21341	1.17309		2.50893	1.02692		2.44797	1.05438		2.24004	1.22113
1335 ms	0.457105	0.949187		0.6397	0.890576		0.63214	0.876437		0.46274	0.679984			1.29148	1.47142		1.30923	1.23527		1.75141	1.81665		2.82261	2.20263			1.21187	1.17258		2.50651	1.02696		2.44455	1.05453		2.23787	1.22036
1336 ms	0.457259	0.949434		0.639424	0.890383		0.631553	0.876006		0.46232	0.67987			1.29161	1.47328		1.30792	1.23536		1.74994	1.8163		2.81976	2.2019			1.21104	1.17144		2.50405	1.02714		2.44113	1.05476		2.23523	1.2199
1337 ms	0.457711	0.949237		0.638648	0.88989		0.631027	0.875852		0.461949	0.679747			1.28983	1.47596		1.30643	1.23515		1.74818	1.816		2.81682	2.20116			1.2103	1.17085		2.50128	1.02688		2.43814	1.055		2.23313	1.21936
1338 ms	0.458102	0.948891		0.638195	0.889497		0.63061	0.875595		0.46164	0.679638			1.28932	1.47699		1.30517	1.235		1.74675	1.81567		2.81408	2.20062			1.20876	1.17024		2.49978	1.0271		2.43503	1.05647		2.23112	1.21896
1339 ms	0.458278	0.949024		0.637662	0.889237		0.630173	0.875393		0.461338	0.679557			1.29027	1.47846		1.30412	1.23458		1.74498	1.81522		2.81146	2.20018			1.20785	1.1697		2.49751	1.0273		2.43203	1.05636		2.22869	1.21833
1340 ms	0.458761	0.948718		0.637186	0.888937		0.629516	0.875087		0.461083	0.679426			1.29003	1.47962		1.30298	1.23459		1.74324	1.81468		2.80873	2.1997			1.20648	1.16882		2.49484	1.02769		2.42913	1.05623		2.22615	1.21776
1341 ms	0.458589	0.948561		0.636719	0.888653		0.629063	0.874836		0.460741	0.679311			1.28975	1.48113		1.30192	1.23431		1.74198	1.81424		2.80598	2.19912			1.20578	1.16803		2.49267	1.02687		2.42614	1.05663		2.2239	1.21757
1342 ms	0.458585	0.948262		0.636272	0.888611		0.628432	0.874476		0.460473	0.679259			1.28919	1.48347		1.30073	1.23416		1.7405	1.81349		2.80311	2.19882			1.20445	1.16765		2.48999	1.02652		2.42385	1.0572		2.22148	1.21774
1343 ms	0.458063	0.948028		0.63558	0.888322		0.627824	0.87424		0.46019	0.679148			1.28828	1.48497		1.29951	1.23381		1.73901	1.81273		2.80028	2.1982			1.20311	1.16692		2.48727	1.02648		2.42165	1.0573		2.21947	1.21712
1344 ms	0.457901	0.947995		0.635111	0.88817		0.627167	0.874		0.459947	0.678867			1.28841	1.48559		1.29833	1.23348		1.7381	1.81233		2.7974	2.19765			1.202	1.16577		2.48545	1.02587		2.4189	1.0576		2.21732	1.2167
1345 ms	0.456988	0.948216		0.634512	0.888081		0.626611	0.873936		0.459591	0.678772			1.28846	1.48706		1.29692	1.23335		1.73657	1.81185		2.79463	2.19721			1.20113	1.16406		2.48245	1.02526		2.416	1.05757		2.21496	1.21631
1346 ms	0.456649	0.948096		0.634073	0.887805		0.625808	0.873723		0.459221	0.67857			1.28708	1.48882		1.29591	1.23338		1.73549	1.81119		2.79187	2.19643			1.19881	1.16385		2.48001	1.02495		2.41249	1.05825		2.21357	1.21622
1347 ms	0.456237	0.947915		0.63347	0.887548		0.625361	0.873614		0.458701	0.678208			1.28707	1.49095		1.29443	1.23339		1.73435	1.81082		2.78933	2.19553			1.19665	1.16328		2.47773	1.02475		2.40928	1.05842		2.21138	1.21635
1348 ms	0.455822	0.947635		0.633016	0.88744		0.624636	0.873406		0.458337	0.678046			1.28663	1.49243		1.29306	1.23316		1.73255	1.81028		2.78673	2.19482			1.19503	1.16269		2.47513	1.02483		2.40639	1.05899		2.20935	1.21584
1349 ms	0.455513	0.947709		0.63231	0.887182		0.624003	0.873385		0.457847	0.677804			1.286	1.49359		1.29184	1.23304		1.73103	1.81005		2.78391	2.19411			1.19409	1.16147		2.47242	1.02498		2.40346	1.05931		2.207	1.21517
1350 ms	0.455901	0.947714		0.631828	0.887082		0.623366	0.873173		0.457452	0.67771			1.28659	1.49488		1.29119	1.23295		1.72975	1.80946		2.78125	2.19316			1.19242	1.16085		2.47064	1.02466		2.40011	1.05926		2.20463	1.21551
1351 ms	0.455825	0.947672		0.631302	0.886762		0.622813	0.872894		0.457004	0.677753			1.28707	1.49655		1.28993	1.23296		1.72802	1.80874		2.77881	2.19238			1.19114	1.16018		2.46779	1.02478		2.3968	1.05931		2.20243	1.21517
1352 ms	0.456567	0.947617		0.630855	0.886426		0.62222	0.872518		0.456551	0.677485			1.28716	1.49864		1.28848	1.23285		1.72669	1.80811		2.77648	2.1913			1.18966	1.16012		2.46542	1.02511		2.39417	1.05911		2.20045	1.21478
1353 ms	0.456881	0.947585		0.630324	0.88615		0.621918	0.872222		0.456138	0.677224			1.28819	1.50034		1.28719	1.23269		1.72497	1.80765		2.77397	2.1905			1.18922	1.15935		2.46292	1.02515		2.39158	1.05897		2.19795	1.21517
1354 ms	0.457056	0.947625		0.629839	0.88593		0.621397	0.871707		0.455792	0.677034			1.28879	1.50196		1.28621	1.23268		1.72362	1.80715		2.77143	2.18973			1.18936	1.1581		2.46038	1.02536		2.38897	1.0592		2.19586	1.21501
1355 ms	0.457838	0.947642		0.629238	0.88557		0.621062	0.871469		0.455417	0.676642			1.2891	1.5036		1.28477	1.23281		1.72267	1.80629		2.7691	2.18877			1.18854	1.15728		2.4572	1.02596		2.38611	1.05889		2.19394	1.21533
1356 ms	0.458226	0.947704		0.628918	0.885399		0.620696	0.870986		0.455008	0.676199			1.28981	1.50573		1.28319	1.2325		1.7213	1.80557		2.76679	2.1881			1.18786	1.15664		2.45551	1.0259		2.38289	1.05884		2.19245	1.21551
1357 ms	0.458112	0.947864		0.628356	0.88504		0.620185	0.870676		0.454487	0.675769			1.28935	1.50793		1.28116	1.23221		1.71998	1.80533		2.76435	2.18765			1.18676	1.15669		2.45309	1.02532		2.38054	1.05939		2.19033	1.21591
1358 ms	0.45846	0.947823		0.627895	0.884748		0.619805	0.870557		0.454138	0.675415			1.28883	1.51009		1.28007	1.23228		1.7185	1.80486		2.76196	2.18678			1.18592	1.15664		2.45085	1.02499		2.37793	1.05946		2.18824	1.21659
1359 ms	0.458165	0.948036		0.627673	0.884684		0.619242	0.870398		0.453735	0.675102			1.28843	1.51202		1.27935	1.23209		1.71691	1.80419		2.75948	2.18616			1.18549	1.15624		2.44891	1.02493		2.37532	1.06002		2.18609	1.21717
1360 ms	0.458283	0.947872		0.627118	0.884487		0.618444	0.870056		0.453328	0.674772			1.28853	1.51386		1.27783	1.23217		1.71563	1.80335		2.75694	2.18564			1.18438	1.15509		2.44655	1.02478		2.37314	1.06022		2.1843	1.21705
1361 ms	0.457991	0.948446		0.626721	0.884479		0.617807	0.869797		0.452889	0.674442			1.28809	1.5157		1.27637	1.2316		1.71397	1.80259		2.75406	2.18513			1.18331	1.15468		2.4448	1.02402		2.37001	1.06111		2.18263	1.21715
1362 ms	0.45769	0.948566		0.62639	0.884391		0.617011	0.869326		0.452428	0.674064			1.28794	1.51791		1.27543	1.23143		1.71212	1.80223		2.75149	2.18474			1.18307	1.1541		2.44292	1.0236		2.36728	1.06176		2.18077	1.21712
1363 ms	0.457178	0.948702		0.625843	0.884174		0.616111	0.869058		0.451957	0.673741			1.28768	1.51939		1.2745	1.23136		1.71085	1.80165		2.749	2.18394			1.1821	1.15335		2.44047	1.02325		2.36486	1.06231		2.17888	1.21675
1364 ms	0.457493	0.948884		0.625548	0.884131		0.615514	0.868966		0.451548	0.67334			1.28801	1.52098		1.27373	1.23137		1.70938	1.80107		2.74653	2.18333			1.18128	1.15289		2.43799	1.02332		2.36255	1.06261		2.17742	1.21623
1365 ms	0.456927	0.948995		0.625032	0.884074		0.614866	0.868663		0.450979	0.672849			1.28785	1.52281		1.27267	1.23092		1.70805	1.80046		2.74407	2.1829			1.18051	1.15235		2.43632	1.02309		2.36028	1.06328		2.17568	1.21643
1366 ms	0.456942	0.949295		0.62423	0.883892		0.614357	0.868385		0.450507	0.672411			1.28759	1.52407		1.27122	1.23087		1.7067	1.79998		2.74131	2.18229			1.17917	1.152		2.43367	1.02279		2.35793	1.06378		2.17407	1.21667
1367 ms	0.456568	0.949338		0.623826	0.883622		0.613847	0.868128		0.449989	0.672079			1.28732	1.52533		1.27021	1.23056		1.70537	1.79942		2.73905	2.18142			1.17859	1.15217		2.43221	1.02212		2.35505	1.06471		2.17256	1.21635
1368 ms	0.456776	0.949481		0.623294	0.883126		0.613294	0.86774		0.449522	0.671764			1.28586	1.52655		1.26949	1.23061		1.7041	1.79893		2.73661	2.18064			1.1771	1.15237		2.42954	1.02216		2.35283	1.06477		2.17049	1.21625
1369 ms	0.456934	0.949566		0.622718	0.882836		0.61298	0.867515		0.449061	0.671452			1.28587	1.52767		1.26835	1.23029		1.70301	1.79843		2.73387	2.18008			1.17524	1.15281		2.42785	1.02198		2.35058	1.06522		2.16815	1.21638
1370 ms	0.457173	0.949853		0.622145	0.88246		0.612679	0.867136		0.448633	0.671158			1.28538	1.52905		1.26749	1.23031		1.70186	1.79796		2.73163	2.1794			1.17429	1.15289		2.42594	1.02193		2.34783	1.0656		2.1665	1.21647
1371 ms	0.457113	0.94944		0.621682	0.882185		0.612232	0.866573		0.448188	0.670784			1.28503	1.5302		1.26633	1.23007		1.70025	1.79718		2.72919	2.17864			1.1734	1.15274		2.42346	1.02196		2.345	1.06597		2.16484	1.21632
1372 ms	0.457515	0.949596		0.621211	0.881919		0.611825	0.866175		0.447705	0.670347			1.28473	1.53038		1.26503	1.23003		1.69895	1.79671		2.7265	2.1777			1.17216	1.15245		2.4205	1.02209		2.34259	1.06627		2.16292	1.2159
1373 ms	0.457532	0.949185		0.620847	0.881834		0.611269	0.865813		0.447233	0.670112			1.28487	1.53126		1.26436	1.22975		1.6977	1.79638		2.7243	2.17696			1.17195	1.15163		2.41868	1.02206		2.33994	1.06685		2.16142	1.21535
1374 ms	0.457662	0.949472		0.620507	0.881598		0.610764	0.86545		0.446809	0.66979			1.28345	1.53203		1.26327	1.22976		1.69601	1.79604		2.72164	2.17643			1.17035	1.15151		2.41622	1.02238		2.3377	1.06719		2.15915	1.21535
1375 ms	0.457632	0.948961		0.62017	0.881449		0.610125	0.865186		0.44635	0.669426			1.28415	1.53284		1.26199	1.22959		1.69447	1.79554		2.71931	2.17584			1.16948	1.15068		2.41404	1.02229		2.3352	1.06767		2.1579	1.2153
1376 ms	0.457431	0.949173		0.619859	0.881206		0.60939	0.864864		0.445884	0.669212			1.28271	1.53323		1.26081	1.22952		1.69311	1.7949		2.71701	2.17512			1.16852	1.1502		2.41163	1.02191		2.33281	1.06792		2.15673	1.21523
1377 ms	0.457319	0.948767		0.619536	0.880911		0.608644	0.864748		0.445481	0.668929			1.2824	1.53373		1.25921	1.22946		1.69156	1.79416		2.71442	2.17463			1.16703	1.14973		2.40917	1.02192		2.33021	1.069		2.15491	1.21533
1378 ms	0.456948	0.949116		0.619136	0.880558		0.608035	0.864632		0.445083	0.668716			1.28172	1.53431		1.2581	1.22941		1.69043	1.79377		2.712	2.17381			1.16625	1.14839		2.40732	1.02185		2.32752	1.06941		2.15314	1.21514
1379 ms	0.45658	0.949191		0.618874	0.880332		0.607247	0.864315		0.444729	0.668595			1.28144	1.53488		1.25711	1.22932		1.68912	1.79334		2.7097	2.17321			1.1651	1.14783		2.406	1.0217		2.32462	1.0699		2.15137	1.21517
1380 ms	0.45639	0.949325		0.618428	0.880004		0.606648	0.864022		0.44435	0.668229			1.28069	1.5354		1.25544	1.22937		1.68775	1.79274		2.70703	2.17253			1.16378	1.14741		2.40353	1.02125		2.32225	1.0703		2.14945	1.21489
1381 ms	0.456012	0.949178		0.617895	0.879858		0.606073	0.863679		0.443907	0.667906			1.28044	1.53588		1.2545	1.22904		1.68663	1.79241		2.70463	2.17178			1.1625	1.14658		2.40147	1.02085		2.31986	1.07073		2.14802	1.21492
1382 ms	0.455688	0.949588		0.617191	0.879599		0.605577	0.863462		0.443463	0.667686			1.27887	1.53558		1.25313	1.22884		1.68545	1.79188		2.70234	2.17117			1.16164	1.14603		2.3994	1.02134		2.31757	1.07109		2.14617	1.21487
1383 ms	0.455492	0.949388		0.616525	0.879464		0.605123	0.863195		0.443017	0.667345			1.27859	1.53608		1.25183	1.22852		1.68425	1.7916		2.70011	2.17039			1.16058	1.14484		2.39723	1.02128		2.315	1.07165		2.14413	1.2144
1384 ms	0.455151	0.949575		0.616059	0.879425		0.604651	0.86286		0.44255	0.667076			1.27799	1.53645		1.2508	1.22814		1.68285	1.79115		2.69772	2.16949			1.15982	1.14412		2.3955	1.02095		2.31271	1.07181		2.14185	1.21455
1385 ms	0.455524	0.949555		0.6153	0.879373		0.604071	0.862492		0.44216	0.666779			1.27569	1.53582		1.24977	1.22791		1.68142	1.79056		2.69534	2.16897			1.15902	1.14351		2.39346	1.02112		2.31061	1.07218		2.13976	1.21473
1386 ms	0.455703	0.949527		0.614732	0.879131		0.603677	0.862243		0.441707	0.666416			1.27485	1.53553		1.24871	1.22747		1.67997	1.79013		2.69287	2.16811			1.15743	1.1428		2.39096	1.02136		2.30865	1.07259		2.13806	1.21466
1387 ms	0.455891	0.949792		0.614173	0.878926		0.603147	0.861916		0.441251	0.666057			1.2743	1.53496		1.24774	1.22725		1.67852	1.78965		2.69082	2.16717			1.15551	1.14204		2.38917	1.02182		2.30664	1.07306		2.13609	1.21518
1388 ms	0.456235	0.9498		0.613577	0.87867		0.602574	0.861682		0.44082	0.665753			1.27456	1.5341		1.24623	1.22706		1.67731	1.78909		2.68854	2.16627			1.15447	1.14114		2.38727	1.0221		2.30454	1.07359		2.13464	1.21487
1389 ms	0.45628	0.949876		0.613425	0.878571		0.602012	0.861463		0.440425	0.665477			1.27468	1.53341		1.24505	1.22688		1.67606	1.78862		2.68648	2.16521			1.15306	1.14084		2.38536	1.02148		2.30192	1.07397		2.1328	1.21511
1390 ms	0.456766	0.95002		0.613054	0.878257		0.601254	0.861058		0.440109	0.665194			1.27398	1.53208		1.24385	1.22674		1.67468	1.78823		2.68405	2.16444			1.15214	1.14044		2.38344	1.02134		2.29936	1.07431		2.13085	1.21543
1391 ms	0.457269	0.950391		0.612795	0.878045		0.600664	0.860694		0.439758	0.665011			1.2732	1.53124		1.2427	1.22648		1.67351	1.78801		2.68187	2.16382			1.1506	1.13982		2.38128	1.02123		2.2978	1.07447		2.12989	1.21487
1392 ms	0.456984	0.950253		0.612527	0.877703		0.599914	0.860275		0.439291	0.664735			1.27426	1.53044		1.24155	1.22624		1.67251	1.78776		2.67944	2.16314			1.14921	1.13938		2.37931	1.02124		2.29523	1.07477		2.12886	1.21443
1393 ms	0.45676	0.950473		0.612145	0.877562		0.599147	0.859966		0.438896	0.664552			1.27445	1.52938		1.24044	1.2262		1.67131	1.78746		2.67733	2.16277			1.14881	1.13874		2.37698	1.02068		2.29294	1.07518		2.12688	1.2139
1394 ms	0.4563	0.950365		0.611737	0.877334		0.598479	0.859802		0.43842	0.664344			1.27307	1.52861		1.2396	1.22561		1.67042	1.78706		2.67486	2.16224			1.14783	1.13769		2.37442	1.02037		2.28964	1.07525		2.12507	1.21308
1395 ms	0.45614	0.950776		0.611601	0.877233		0.597859	0.859508		0.437998	0.663986			1.27243	1.52781		1.23898	1.22521		1.66916	1.78659		2.67262	2.16196			1.14732	1.1373		2.37225	1.01998		2.28719	1.0752		2.12298	1.21301
1396 ms	0.455846	0.950673		0.611122	0.877135		0.597277	0.859265		0.437569	0.663778			1.27204	1.52722		1.23785	1.22501		1.66801	1.78613		2.67021	2.16145			1.147	1.13699		2.37048	1.02031		2.28544	1.07552		2.12161	1.21218
1397 ms	0.455122	0.951143		0.6106	0.876926		0.596814	0.859062		0.436981	0.663503			1.27159	1.52675		1.23723	1.22492		1.66686	1.78544		2.66797	2.16102			1.14639	1.13571		2.36899	1.0201		2.2834	1.07626		2.12024	1.21146
1398 ms	0.45475	0.950896		0.610174	0.876764		0.596328	0.858858		0.436472	0.663213			1.27019	1.52622		1.2362	1.22474		1.66561	1.78462		2.66552	2.16041			1.14645	1.13496		2.36705	1.0197		2.28045	1.07652		2.11826	1.21158
1399 ms	0.454752	0.95119		0.609867	0.876651		0.595903	0.858673		0.436027	0.662994			1.26887	1.52583		1.23504	1.2246		1.66416	1.78405		2.66343	2.15962			1.14537	1.13502		2.36499	1.01898		2.27854	1.0763		2.11609	1.21165
1400 ms	0.454775	0.9512		0.609373	0.87654		0.595439	0.858385		0.435566	0.66276			1.26662	1.52558		1.23375	1.22451		1.66295	1.78329		2.66089	2.15885			1.14467	1.13432		2.36381	1.01919		2.27636	1.07622		2.11458	1.21195
1401 ms	0.455247	0.951294		0.608931	0.87639		0.594883	0.857895		0.435181	0.66254			1.26645	1.52489		1.23247	1.22452		1.66156	1.78264		2.6584	2.15854			1.14426	1.13403		2.36239	1.01887		2.27471	1.07621		2.11325	1.2119
1402 ms	0.455378	0.950898		0.608405	0.876104		0.594561	0.857519		0.434757	0.662347			1.26457	1.52515		1.23067	1.22449		1.6606	1.78225		2.65602	2.15784			1.14313	1.13332		2.36021	1.0192		2.27168	1.07639		2.11174	1.21177
1403 ms	0.455984	0.950878		0.608063	0.875841		0.594133	0.85707		0.434393	0.662009			1.26289	1.5248		1.22977	1.22418		1.65923	1.78179		2.65373	2.15735			1.14246	1.13181		2.35801	1.01821		2.26991	1.07636		2.10961	1.21199
1404 ms	0.456755	0.950608		0.607763	0.875735		0.59361	0.856618		0.434063	0.661592			1.26167	1.52469		1.22815	1.22381		1.65793	1.78136		2.65117	2.15654			1.14172	1.13165		2.3556	1.01845		2.26724	1.07597		2.10803	1.21204
1405 ms	0.457205	0.950512		0.607271	0.875585		0.593144	0.856373		0.433723	0.66116			1.26147	1.52377		1.2271	1.22367		1.65655	1.78115		2.64913	2.15589			1.14051	1.1314		2.35352	1.01794		2.26454	1.07591		2.10703	1.21212
1406 ms	0.457429	0.950058		0.606724	0.875456		0.592632	0.856009		0.433396	0.660854			1.26073	1.52329		1.22607	1.22344		1.65536	1.78064		2.64678	2.15548			1.14047	1.1302		2.35189	1.01746		2.26203	1.07632		2.10532	1.21266
1407 ms	0.457765	0.950103		0.60656	0.875234		0.59214	0.855726		0.433091	0.660502			1.26088	1.52311		1.22505	1.22317		1.65405	1.78011		2.64473	2.15491			1.1391	1.1298		2.34969	1.0172		2.25985	1.07662		2.10414	1.2125
1408 ms	0.457625	0.949577		0.606058	0.874901		0.591881	0.855625		0.432794	0.660323			1.26017	1.52264		1.22402	1.22298		1.65289	1.77977		2.64262	2.15415			1.13814	1.12995		2.3478	1.01739		2.25751	1.07688		2.10275	1.21291
1409 ms	0.457697	0.94972		0.605802	0.87478		0.591109	0.855389		0.432502	0.660135			1.26028	1.52174		1.22346	1.22257		1.65147	1.77913		2.64045	2.15379			1.13813	1.12883		2.34592	1.01704		2.25584	1.07685		2.10128	1.21276
1410 ms	0.457116	0.949567		0.6053	0.874579		0.590493	0.85516		0.432023	0.659778			1.26023	1.52141		1.22243	1.22223		1.65031	1.77867		2.63795	2.15327			1.13712	1.12845		2.34376	1.01742		2.25287	1.07747		2.10012	1.21268
1411 ms	0.456697	0.949423		0.60506	0.87441		0.589905	0.855074		0.431629	0.659616			1.26014	1.52049		1.22141	1.22202		1.64924	1.7782		2.63622	2.15264			1.13583	1.12801		2.34173	1.01708		2.25093	1.07798		2.09886	1.21282
1412 ms	0.455998	0.949189		0.604559	0.874065		0.58935	0.854687		0.431156	0.659405			1.2603	1.51947		1.22047	1.22186		1.64795	1.77753		2.63396	2.15186			1.13512	1.12798		2.34004	1.01751		2.24927	1.07816		2.09659	1.21255
1413 ms	0.455642	0.94917		0.604144	0.873845		0.588947	0.85446		0.430697	0.659049			1.25997	1.51875		1.21918	1.22167		1.64699	1.77687		2.63198	2.15127			1.13446	1.12746		2.33816	1.01786		2.24712	1.07868		2.09516	1.2119
1414 ms	0.455388	0.949043		0.603458	0.873534		0.588464	0.854091		0.430296	0.658893			1.25981	1.51791		1.21782	1.22134		1.64586	1.77654		2.6299	2.15071			1.13422	1.12665		2.3364	1.01726		2.2444	1.07911		2.09358	1.21193
1415 ms	0.455067	0.949014		0.603202	0.873483		0.587894	0.853741		0.429798	0.65846			1.25949	1.51742		1.21643	1.2211		1.64452	1.77594		2.6278	2.15023			1.13307	1.12595		2.33426	1.01708		2.24223	1.07966		2.09169	1.21165
1416 ms	0.454745	0.949005		0.602555	0.873209		0.587541	0.85357		0.429387	0.658228			1.25901	1.51644		1.2152	1.22106		1.64314	1.77548		2.62429	2.14893			1.13197	1.12524		2.33269	1.01677		2.24028	1.08001		2.08984	1.21153
1417 ms	0.454951	0.948713		0.602083	0.872961		0.586999	0.853313		0.429095	0.658007			1.259	1.51564		1.21421	1.221		1.64191	1.77484		2.62243	2.14829			1.1311	1.12514		2.3315	1.01597		2.23816	1.08		2.0881	1.2116
1418 ms	0.455055	0.948662		0.601602	0.87268		0.586675	0.853065		0.428798	0.657825			1.25853	1.51556		1.21336	1.2208		1.64059	1.77456		2.62026	2.14772			1.13066	1.12518		2.32974	1.01539		2.23619	1.08006		2.0865	1.21105
1419 ms	0.455683	0.94873		0.601479	0.872538		0.586131	0.852783		0.428554	0.65764			1.25719	1.51582		1.21218	1.22043		1.63969	1.77416		2.6182	2.14742			1.13028	1.12345		2.32829	1.01456		2.23485	1.08021		2.08493	1.21074
1420 ms	0.455859	0.948975		0.601032	0.87226		0.585597	0.852514		0.428194	0.657395			1.25795	1.51602		1.21112	1.22004		1.63818	1.77379		2.61609	2.14674			1.12912	1.12359		2.32554	1.01572		2.23297	1.08042		2.08342	1.21071
1421 ms	0.456239	0.948709		0.6008	0.872179		0.585114	0.852274		0.427873	0.657059			1.25727	1.51581		1.21022	1.21995		1.63712	1.77327		2.61392	2.14615			1.12829	1.12315		2.3229	1.01734		2.2311	1.08007		2.08169	1.21027
1422 ms	0.456753	0.948974		0.600258	0.871722		0.584496	0.852071		0.427599	0.656945			1.2574	1.51548		1.20945	1.21961		1.63599	1.77273		2.61236	2.14551			1.12817	1.12234		2.32118	1.01716		2.22879	1.08018		2.08048	1.20987
1423 ms	0.457241	0.948558		0.599945	0.871434		0.584008	0.851816		0.427299	0.656627			1.25757	1.51511		1.20818	1.21931		1.63491	1.77227		2.61173	2.14544			1.12781	1.12204		2.31868	1.01742		2.22662	1.08005		2.07912	1.20976
1424 ms	0.457274	0.948826		0.599336	0.871117		0.583524	0.851573		0.426979	0.656601			1.25622	1.51544		1.20715	1.21903		1.63385	1.77174		2.60962	2.14478			1.12679	1.12147		2.31591	1.01846		2.22475	1.08038		2.07792	1.20907
1425 ms	0.45748	0.94872		0.598872	0.870775		0.582961	0.851266		0.426657	0.656384			1.25579	1.51506		1.206	1.21871		1.63275	1.77105		2.60741	2.14411			1.12669	1.11986		2.31383	1.01915		2.22254	1.0804		2.07608	1.20904
1426 ms	0.45715	0.948661		0.598341	0.870558		0.582429	0.851142		0.426346	0.656276			1.25609	1.51461		1.20513	1.21847		1.63139	1.77045		2.60518	2.14346			1.12501	1.12039		2.31117	1.01987		2.22011	1.08017		2.07435	1.20966
1427 ms	0.457184	0.948658		0.597889	0.870306		0.581736	0.850852		0.426026	0.656082			1.2545	1.51438		1.20393	1.2183		1.63037	1.76995		2.60317	2.14285			1.124	1.11907		2.30987	1.01845		2.21804	1.08029		2.07309	1.20955
1428 ms	0.456539	0.948705		0.597436	0.869853		0.581145	0.850651		0.425622	0.655871			1.25346	1.5144		1.20304	1.21806		1.62924	1.76948		2.60103	2.14219			1.12344	1.11872		2.30858	1.01729		2.21638	1.08085		2.07171	1.20956
1429 ms	0.456261	0.948677		0.597239	0.869801		0.580534	0.850298		0.425317	0.655575			1.25286	1.51405		1.20193	1.2178		1.62829	1.76923		2.59856	2.14145			1.12253	1.11818		2.3069	1.01683		2.21484	1.08056		2.06978	1.20981
1430 ms	0.455669	0.949038		0.596798	0.869644		0.579946	0.850043		0.424935	0.655464			1.25128	1.515		1.20106	1.21757		1.62725	1.76882		2.59639	2.14092			1.1206	1.11784		2.30535	1.01654		2.21343	1.08116		2.06879	1.21004
1431 ms	0.455599	0.949123		0.596552	0.869457		0.57961	0.849754		0.424532	0.655126			1.25073	1.5145		1.19974	1.21733		1.6261	1.76852		2.5944	2.14012			1.11951	1.11749		2.30392	1.01618		2.21119	1.08104		2.06699	1.21062
1432 ms	0.455089	0.948894		0.596054	0.869334		0.579009	0.849502		0.424184	0.654995			1.24969	1.51472		1.19834	1.21723		1.62511	1.768		2.59232	2.13958			1.11808	1.11748		2.30196	1.01623		2.20915	1.08091		2.06545	1.21119
1433 ms	0.454946	0.949063		0.595503	0.868957		0.578696	0.849254		0.423784	0.654638			1.24833	1.51464		1.19682	1.21719		1.62426	1.76733		2.59043	2.13895			1.11751	1.1161		2.29988	1.0165		2.20705	1.08078		2.06466	1.2112
1434 ms	0.455025	0.949009		0.595142	0.868579		0.57853	0.849073		0.423515	0.654615			1.24746	1.51481		1.19588	1.21697		1.62306	1.76669		2.58834	2.13839			1.11673	1.11521		2.29798	1.01598		2.20458	1.08139		2.06302	1.21167
1435 ms	0.455268	0.948823		0.594673	0.868481		0.57812	0.848902		0.423156	0.654375			1.24633	1.51463		1.19493	1.21676		1.62192	1.76596		2.58653	2.13776			1.11583	1.115		2.29591	1.01558		2.20271	1.08159		2.06166	1.21219
1436 ms	0.455526	0.948736		0.594148	0.868087		0.577736	0.848685		0.422777	0.654285			1.24394	1.51538		1.19373	1.21681		1.62073	1.76525		2.5842	2.13712			1.11527	1.11465		2.29378	1.01595		2.20069	1.08223		2.0599	1.2122
1437 ms	0.455657	0.948381		0.59375	0.867777		0.577341	0.848346		0.422485	0.654089			1.24237	1.51512		1.19257	1.2166		1.61955	1.76451		2.58202	2.13664			1.11521	1.1149		2.2922	1.0157		2.19812	1.08231		2.05811	1.21217
1438 ms	0.456056	0.948138		0.593407	0.867447		0.576729	0.848162		0.422273	0.653955			1.24051	1.5156		1.19153	1.21652		1.61838	1.76401		2.57994	2.136			1.11534	1.11478		2.29044	1.01558		2.19676	1.08232		2.05628	1.21267
1439 ms	0.456381	0.948187		0.593171	0.867063		0.576349	0.847965		0.422033	0.653782			1.23978	1.51569		1.19082	1.21644		1.61699	1.76319		2.57821	2.13533			1.11494	1.11479		2.28881	1.01527		2.19491	1.08337		2.05538	1.21225
1440 ms	0.456827	0.94813		0.592852	0.866787		0.575693	0.84774		0.421809	0.653716			1.23779	1.51669		1.19	1.21622		1.61541	1.76284		2.57576	2.13494			1.11444	1.11485		2.28784	1.01502		2.19245	1.0844		2.05345	1.21221
1441 ms	0.456485	0.947693		0.592291	0.866274		0.575018	0.847538		0.421506	0.653452			1.23664	1.51677		1.18877	1.21613		1.61437	1.76237		2.57358	2.13438			1.11424	1.11524		2.28611	1.01551		2.1909	1.08447		2.05197	1.21181
1442 ms	0.456542	0.947955		0.592016	0.866076		0.574502	0.847325		0.421347	0.653399			1.2366	1.51671		1.18742	1.21594		1.6132	1.76188		2.5712	2.13371			1.11381	1.11435		2.28514	1.01564		2.1889	1.08456		2.05035	1.21135
1443 ms	0.456105	0.947585		0.591676	0.865711		0.573865	0.847084		0.421152	0.653173			1.2375	1.51537		1.18634	1.21573		1.61211	1.7612		2.56934	2.13324			1.11317	1.11422		2.28342	1.01578		2.18669	1.08504		2.04969	1.21116
1444 ms	0.456086	0.94745		0.591321	0.865266		0.573279	0.846859		0.420852	0.65302			1.23701	1.51519		1.18524	1.21578		1.611	1.76056		2.56743	2.13268			1.1119	1.11369		2.28188	1.01618		2.18466	1.0858		2.04789	1.21119
1445 ms	0.455468	0.947383		0.590898	0.864966		0.572664	0.846581		0.420458	0.652793			1.23744	1.515		1.18407	1.2157		1.60969	1.75984		2.56547	2.13212			1.11111	1.11283		2.28009	1.01623		2.18219	1.08682		2.04671	1.21068
1446 ms	0.45508	0.947143		0.590392	0.86472		0.5723	0.846393		0.420104	0.652592			1.23616	1.51501		1.18287	1.21571		1.60854	1.7593		2.56317	2.13185			1.11018	1.11255		2.27893	1.01668		2.18027	1.08681		2.04486	1.21041
1447 ms	0.454793	0.947194		0.589911	0.864383		0.571923	0.846129		0.419691	0.652356			1.23682	1.51411		1.18187	1.21552		1.60759	1.75875		2.56144	2.1311			1.11001	1.11184		2.27722	1.01664		2.17862	1.08745		2.04353	1.2098
1448 ms	0.454846	0.947511		0.589743	0.864394		0.571562	0.845939		0.419383	0.652247			1.23666	1.51387		1.18112	1.21551		1.60657	1.75823		2.55942	2.13075			1.10952	1.11103		2.27592	1.01719		2.1762	1.088		2.0417	1.20964
1449 ms	0.4544	0.947148		0.589125	0.863883		0.571235	0.845524		0.41891	0.652036			1.23603	1.51297		1.18036	1.21541		1.60519	1.75761		2.55755	2.13043			1.1083	1.11175		2.27433	1.01769		2.17401	1.08917		2.03981	1.21004
1450 ms	0.454202	0.947264		0.58869	0.863643		0.571137	0.845289		0.418449	0.651872			1.23423	1.51348		1.17919	1.21541		1.60387	1.75714		2.55582	2.12968			1.10742	1.11158		2.27374	1.01766		2.17171	1.08949		2.03772	1.21004
1451 ms	0.454025	0.947384		0.588095	0.863525		0.5708	0.845033		0.418047	0.65162			1.23429	1.51336		1.17854	1.21532		1.60252	1.75665		2.55363	2.12919			1.10729	1.11091		2.27227	1.01756		2.16999	1.0898		2.03606	1.21012
1452 ms	0.454137	0.947449		0.587639	0.863179		0.570528	0.844744		0.417697	0.651402			1.23374	1.5135		1.17773	1.21539		1.60113	1.75616		2.55163	2.12867			1.10763	1.11054		2.27175	1.01815		2.16806	1.08997		2.0348	1.20965
1453 ms	0.454203	0.947541		0.587287	0.862924		0.569992	0.844275		0.417316	0.651141			1.23421	1.51241		1.17703	1.21514		1.6	1.75554		2.54964	2.12811			1.10667	1.11026		2.27088	1.01779		2.16579	1.09078		2.03307	1.21029
1454 ms	0.454274	0.947193		0.586767	0.862582		0.569635	0.843917		0.417058	0.651009			1.23346	1.51248		1.17614	1.21501		1.59896	1.75488		2.54773	2.12766			1.10603	1.11006		2.26925	1.01831		2.16381	1.09108		2.03154	1.21011
1455 ms	0.454367	0.947279		0.586533	0.862299		0.569231	0.84363		0.416669	0.650741			1.233	1.51151		1.17517	1.21497		1.59738	1.75433		2.54577	2.12674			1.10546	1.11093		2.26832	1.01824		2.16245	1.09095		2.03044	1.21011
1456 ms	0.454781	0.94711		0.586143	0.862193		0.568704	0.843471		0.416442	0.650459			1.23261	1.51147		1.17395	1.21494		1.59635	1.75377		2.54393	2.12582			1.10581	1.10972		2.26692	1.01809		2.16035	1.09118		2.02944	1.20959
1457 ms	0.45523	0.94735		0.585681	0.862074		0.56814	0.843285		0.416247	0.650294			1.23224	1.51065		1.17357	1.2149		1.59506	1.75323		2.54166	2.12534			1.10539	1.1092		2.2652	1.01878		2.15843	1.09162		2.02865	1.20923
1458 ms	0.455578	0.94741		0.585453	0.861716		0.567585	0.843057		0.415976	0.649981			1.23195	1.51018		1.17272	1.2147		1.59378	1.75275		2.53992	2.12462			1.10535	1.10914		2.26397	1.01949		2.15631	1.09264		2.02759	1.20855
1459 ms	0.455596	0.947249		0.585146	0.861464		0.567116	0.842879		0.415729	0.649801			1.23208	1.50932		1.17168	1.21445		1.59324	1.75224		2.53792	2.12407			1.10422	1.10937		2.26232	1.01965		2.15428	1.09305		2.02612	1.20881
1460 ms	0.455552	0.947507		0.584837	0.861178		0.566674	0.842941		0.41542	0.649619			1.2312	1.50895		1.1706	1.21435		1.59204	1.75187		2.53617	2.12336			1.10438	1.10923		2.26054	1.02049		2.15231	1.09329		2.02512	1.20803
1461 ms	0.455064	0.947342		0.584594	0.86097		0.566046	0.842884		0.415026	0.649355			1.23096	1.50826		1.1696	1.2144		1.59076	1.75138		2.53433	2.1226			1.10371	1.10926		2.26007	1.02059		2.15022	1.09366		2.02357	1.20802
1462 ms	0.45484	0.9473		0.583869	0.860831		0.565547	0.842746		0.414613	0.649094			1.22994	1.50828		1.16844	1.21432		1.58971	1.75094		2.53232	2.12227			1.10271	1.10857		2.25905	1.02061		2.14809	1.09461		2.02248	1.20746
1463 ms	0.454397	0.94741		0.583519	0.860443		0.565082	0.842631		0.414185	0.648896			1.22921	1.50765		1.1677	1.21421		1.58852	1.75063		2.53041	2.12209			1.10231	1.10884		2.25768	1.02132		2.14644	1.09474		2.02117	1.2071
1464 ms	0.453974	0.947418		0.583303	0.859996		0.564631	0.842573		0.413689	0.648605			1.23004	1.50767		1.16638	1.2141		1.58749	1.75028		2.52849	2.12179			1.10169	1.10905		2.25635	1.02168		2.14504	1.095		2.01943	1.20668
1465 ms	0.453521	0.947307		0.582835	0.859641		0.564247	0.842448		0.413306	0.648505			1.2296	1.50719		1.16523	1.21407		1.58676	1.74985		2.52638	2.12141			1.10062	1.10924		2.25514	1.02227		2.14329	1.09443		2.01781	1.2068
1466 ms	0.453241	0.947249		0.582356	0.859396		0.563796	0.842205		0.412911	0.648312			1.22898	1.50673		1.16458	1.21395		1.58551	1.74922		2.52456	2.12093			1.09922	1.10915		2.25345	1.02312		2.14155	1.09458		2.01619	1.20595
1467 ms	0.45299	0.94717		0.581865	0.858977		0.563283	0.841722		0.412538	0.648036			1.22887	1.50711		1.16373	1.21386		1.58436	1.7489		2.52243	2.12034			1.09905	1.10861		2.25163	1.02293		2.13985	1.09478		2.01467	1.20543
1468 ms	0.453019	0.9473		0.581243	0.8585		0.562905	0.84131		0.412236	0.647809			1.22885	1.50726		1.1625	1.2139		1.58327	1.74847		2.52045	2.1197			1.09863	1.10812		2.24932	1.02318		2.13775	1.0948		2.01288	1.20513
1469 ms	0.452956	0.947253		0.58075	0.857905		0.562496	0.84098		0.412013	0.647727			1.22924	1.50772		1.1618	1.21384		1.58226	1.74787		2.51854	2.11913			1.09764	1.10772		2.24717	1.02374		2.1359	1.09469		2.01049	1.20541
1470 ms	0.453439	0.947135		0.580329	0.85734		0.562114	0.84065		0.411757	0.64747			1.22965	1.50832		1.16052	1.21379		1.5811	1.74719		2.51661	2.11853			1.09606	1.10762		2.24525	1.02372		2.1344	1.09526		2.00884	1.2052
1471 ms	0.453847	0.947033		0.579737	0.856997		0.561741	0.84035		0.411533	0.647268			1.22869	1.50796		1.15971	1.21384		1.57984	1.74661		2.51484	2.11757			1.09606	1.10731		2.24354	1.02358		2.13246	1.09533		2.00758	1.2055
1472 ms	0.453958	0.946863		0.579297	0.856759		0.561366	0.840123		0.411298	0.647076			1.22831	1.50807		1.15868	1.2139		1.57863	1.74609		2.513	2.11677			1.09523	1.10662		2.24117	1.02328		2.13089	1.09566		2.00587	1.20511
1473 ms	0.45447	0.94713		0.578874	0.856371		0.561105	0.83998		0.411123	0.646848			1.2276	1.50857		1.1575	1.21382		1.57749	1.74567		2.51099	2.11616			1.09491	1.10589		2.23975	1.02338		2.12899	1.09589		2.00468	1.20488
1474 ms	0.454519	0.946903		0.578288	0.856123		0.560735	0.839821		0.410901	0.64676			1.22659	1.50875		1.15647	1.21382		1.57639	1.74468		2.50908	2.11591			1.09361	1.10529		2.23808	1.02366		2.12722	1.09646		2.00295	1.20505
1475 ms	0.4547	0.947207		0.578109	0.855972		0.560343	0.839707		0.410688	0.646671			1.22563	1.50852		1.15607	1.21359		1.57519	1.74414		2.50721	2.11539			1.09284	1.10555		2.23616	1.02426		2.12611	1.09663		2.00209	1.20454
1476 ms	0.454623	0.946967		0.577726	0.855709		0.559692	0.839366		0.410491	0.64653			1.22491	1.50772		1.15528	1.21345		1.57405	1.74379		2.50532	2.1149			1.0924	1.10512		2.23407	1.02427		2.12463	1.09727		2.00112	1.20434
1477 ms	0.454196	0.947359		0.577125	0.855719		0.559123	0.839028		0.410278	0.646626			1.2235	1.50746		1.15464	1.21328		1.573	1.7433		2.50312	2.11443			1.09218	1.10452		2.23244	1.02435		2.12166	1.09757		1.99953	1.20411
1478 ms	0.453603	0.947452		0.576602	0.855479		0.558522	0.838744		0.409986	0.646544			1.22308	1.50753		1.15371	1.21307		1.57194	1.74273		2.50123	2.11437			1.09135	1.10346		2.23069	1.02448		2.12005	1.09765		1.99788	1.20335
1479 ms	0.453091	0.947637		0.576162	0.855217		0.558071	0.838468		0.409714	0.646454			1.2216	1.5072		1.15288	1.21293		1.57068	1.74202		2.49928	2.11414			1.09057	1.10317		2.22874	1.02519		2.11739	1.09831		1.99705	1.20281
1480 ms	0.452549	0.947757		0.575699	0.854915		0.557435	0.83819		0.409372	0.646389			1.22104	1.50613		1.15186	1.21305		1.56955	1.7416		2.49739	2.11389			1.08958	1.10302		2.2269	1.025		2.11558	1.09887		1.99534	1.20252
1481 ms	0.45211	0.947854		0.575308	0.854721		0.557005	0.837936		0.409045	0.646325			1.22133	1.50559		1.15111	1.21322		1.56855	1.74137		2.4957	2.11329			1.08925	1.10254		2.22537	1.02571		2.11389	1.0989		1.9939	1.20222
1482 ms	0.451697	0.94762		0.574733	0.854479		0.5565	0.837631		0.408696	0.646171			1.22041	1.50571		1.15011	1.21336		1.56745	1.74073		2.49404	2.11294			1.08827	1.10176		2.22384	1.02613		2.11217	1.09953		1.99238	1.20183
1483 ms	0.451489	0.947926		0.574374	0.854442		0.556347	0.837471		0.408335	0.646047			1.21965	1.5058		1.14916	1.2135		1.56645	1.74011		2.49245	2.11222			1.0873	1.10101		2.22236	1.02675		2.1098	1.09945		1.99083	1.20097
1484 ms	0.451396	0.947579		0.574073	0.85418		0.555935	0.837395		0.407955	0.645829			1.21892	1.50577		1.14808	1.21359		1.56536	1.73968		2.49093	2.11151			1.08644	1.09958		2.22064	1.02732		2.1089	1.09917		1.98964	1.1998
1485 ms	0.451309	0.947398		0.573748	0.853824		0.555578	0.837092		0.407615	0.645713			1.21837	1.50582		1.14739	1.21369		1.56441	1.73904		2.48892	2.11105			1.0862	1.09861		2.21901	1.02746		2.10714	1.10021		1.98826	1.19954
1486 ms	0.451889	0.947355		0.573181	0.853499		0.555086	0.836855		0.407357	0.645627			1.21805	1.5054		1.14642	1.21379		1.56341	1.73872		2.48747	2.11037			1.08597	1.09752		2.21812	1.02785		2.10634	1.10018		1.98634	1.19939
1487 ms	0.45208	0.947148		0.572651	0.853203		0.554684	0.836611		0.407047	0.645508			1.21774	1.50503		1.14581	1.21378		1.56241	1.73817		2.48586	2.10956			1.08547	1.09664		2.21637	1.02824		2.105	1.10021		1.98517	1.19932
1488 ms	0.452853	0.947244		0.572448	0.852887		0.554191	0.83646		0.406833	0.645241			1.21544	1.50452		1.14491	1.2138		1.56149	1.73765		2.48399	2.10879			1.08466	1.096		2.21441	1.02816		2.10272	1.1002		1.98375	1.19856
1489 ms	0.453351	0.946962		0.57227	0.85269		0.553882	0.836256		0.406653	0.645104			1.21479	1.50391		1.14374	1.21368		1.56047	1.73736		2.48185	2.10815			1.08454	1.09515		2.21356	1.02792		2.10099	1.10009		1.98223	1.19831
1490 ms	0.453484	0.946727		0.571978	0.85241		0.553309	0.836074		0.406364	0.644801			1.21381	1.50383		1.14237	1.21368		1.55928	1.737		2.47988	2.10765			1.08484	1.09481		2.21194	1.02775		2.0992	1.1004		1.98104	1.19781
1491 ms	0.45353	0.947016		0.571737	0.852224		0.552904	0.835766		0.406167	0.644628			1.21297	1.50327		1.14155	1.21386		1.55818	1.73659		2.47812	2.10713			1.08505	1.09489		2.21016	1.02785		2.09745	1.10087		1.97906	1.19835
1492 ms	0.453627	0.946871		0.57151	0.852032		0.552436	0.835546		0.405997	0.644396			1.21216	1.50247		1.14031	1.21379		1.55726	1.73635		2.4771	2.10624			1.08416	1.09539		2.20855	1.02848		2.09579	1.10018		1.97815	1.19794
1493 ms	0.453185	0.94682		0.571327	0.851942		0.551895	0.835336		0.405717	0.644175			1.2127	1.50198		1.13937	1.21358		1.55589	1.73584		2.47529	2.10571			1.0839	1.09607		2.20708	1.02838		2.09372	1.10044		1.97684	1.19747
1494 ms	0.45294	0.946871		0.571226	0.851951		0.551408	0.835345		0.405468	0.64399			1.21218	1.50133		1.13829	1.21341		1.55456	1.73539		2.47336	2.10542			1.08311	1.09614		2.20527	1.02868		2.09156	1.1009		1.97522	1.19707
1495 ms	0.452045	0.946543		0.570816	0.851671		0.550921	0.835122		0.405113	0.643854			1.21067	1.49995		1.13723	1.21312		1.5533	1.73517		2.47168	2.10504			1.08237	1.09607		2.20424	1.02889		2.09064	1.10104		1.97447	1.19658
1496 ms	0.45144	0.947039		0.570397	0.851548		0.550422	0.835064		0.404679	0.643614			1.20835	1.49909		1.13636	1.21303		1.55234	1.73474		2.47006	2.10449			1.08151	1.09588		2.20256	1.02942		2.0889	1.10149		1.97364	1.19635
1497 ms	0.451038	0.946768		0.570066	0.85125		0.549903	0.834829		0.404346	0.643469			1.20636	1.49827		1.13582	1.21285		1.55152	1.73424		2.46846	2.10398			1.08094	1.09594		2.20069	1.03026		2.0877	1.10145		1.97247	1.19601
1498 ms	0.450631	0.946657		0.569771	0.850983		0.54933	0.834793		0.403937	0.643214			1.20432	1.49779		1.13521	1.21259		1.55056	1.73364		2.4668	2.10356			1.07943	1.09578		2.19915	1.0307		2.08609	1.10131		1.97193	1.19555
1499 ms	0.450491	0.946447		0.569333	0.850987		0.548782	0.834695		0.403583	0.643002			1.20143	1.49787		1.1343	1.21253		1.54958	1.73313		2.46443	2.10327			1.07876	1.09547		2.1972	1.03103		2.0838	1.10166		1.96993	1.19513
1500 ms	0.450563	0.946392		0.568812	0.850599		0.548345	0.834629		0.403149	0.64271			1.19811	1.49852		1.13332	1.21254		1.54914	1.73272		2.46268	2.10268			1.07807	1.09511		2.19543	1.0312		2.0825	1.10102		1.96885	1.19508
1501 ms	0.450566	0.946358		0.568169	0.850447		0.547827	0.834217		0.402761	0.642361			1.19569	1.49982		1.13218	1.21262		1.54827	1.73227		2.46099	2.10207			1.07792	1.09527		2.19341	1.03191		2.08086	1.10138		1.96708	1.19451
1502 ms	0.451031	0.946211		0.567815	0.850372		0.547479	0.834144		0.402475	0.642068			1.19526	1.49926		1.13129	1.21235		1.5472	1.73167		2.45921	2.10146			1.07758	1.09568		2.19154	1.03241		2.07919	1.10168		1.96517	1.19483
1503 ms	0.451313	0.945806		0.567376	0.849917		0.546926	0.833896		0.402231	0.641818			1.19382	1.49815		1.13023	1.2122		1.54652	1.73101		2.45719	2.10102			1.07674	1.09623		2.18976	1.03224		2.07711	1.10198		1.96334	1.1945
1504 ms	0.451474	0.94589		0.566973	0.84974		0.546579	0.833801		0.401996	0.64165			1.19366	1.49647		1.12914	1.21216		1.54552	1.73042		2.45523	2.10064			1.07632	1.09641		2.18815	1.03256		2.0751	1.10217		1.96202	1.19453
1505 ms	0.451503	0.945482		0.56664	0.849525		0.54629	0.833522		0.401807	0.641504			1.19308	1.49499		1.12773	1.21207		1.54471	1.72992		2.45335	2.10016			1.07671	1.09676		2.18718	1.03289		2.0736	1.10268		1.96038	1.19466
1506 ms	0.451379	0.945828		0.566384	0.849102		0.545938	0.833192		0.401566	0.641416			1.19271	1.49372		1.12692	1.21182		1.54346	1.72934		2.45139	2.09976			1.07629	1.0965		2.1856	1.03351		2.07222	1.10292		1.95964	1.19457
1507 ms	0.451268	0.945628		0.566358	0.849089		0.545536	0.832915		0.401368	0.641288			1.19027	1.49269		1.12616	1.21175		1.54233	1.72879		2.44911	2.0996			1.07588	1.0964		2.18391	1.03393		2.0705	1.10369		1.95856	1.19414
1508 ms	0.450843	0.945562		0.566262	0.848806		0.545143	0.832775		0.401123	0.64121			1.18719	1.49146		1.12532	1.21151		1.54148	1.72828		2.447	2.09944			1.07597	1.09555		2.18269	1.03357		2.06882	1.10335		1.95808	1.19368
1509 ms	0.450228	0.945525		0.566186	0.848653		0.544652	0.832545		0.400832	0.641125			1.18428	1.4911		1.12471	1.21156		1.54077	1.72762		2.44492	2.09934			1.07529	1.09563		2.18066	1.03404		2.067	1.10375		1.95709	1.19307
1510 ms	0.449609	0.945879		0.565938	0.848628		0.544373	0.832472		0.400445	0.640928			1.18128	1.49142		1.12415	1.21149		1.53953	1.7271		2.44279	2.09929			1.07576	1.09508		2.17835	1.03483		2.06547	1.10384		1.95601	1.19279
1511 ms	0.449108	0.945591		0.565585	0.848416		0.543833	0.832341		0.400107	0.640708			1.17657	1.49238		1.12347	1.21129		1.53849	1.7266		2.44035	2.09936			1.0751	1.09496		2.17645	1.0349		2.06408	1.10389		1.95459	1.19283
1512 ms	0.448757	0.94592		0.565134	0.848269		0.543458	0.832281		0.399712	0.640434			1.17464	1.49291		1.1229	1.21123		1.53716	1.72613		2.43858	2.09878			1.07441	1.09499		2.17452	1.03512		2.06182	1.10402		1.95337	1.19232
1513 ms	0.448238	0.94547		0.564738	0.848068		0.543039	0.83227		0.399369	0.64022			1.17297	1.49264		1.12232	1.2112		1.5364	1.72567		2.43705	2.09796			1.07334	1.09562		2.17283	1.03514		2.05997	1.10469		1.9516	1.19209
1514 ms	0.447683	0.945682		0.564349	0.847816		0.542702	0.832252		0.399022	0.640055			1.17314	1.49083		1.12162	1.21082		1.53547	1.72519		2.43513	2.09741			1.07301	1.09518		2.17134	1.03542		2.05767	1.10488		1.94969	1.19183
1515 ms	0.447217	0.94522		0.564071	0.847584		0.542316	0.832271		0.398736	0.639937			1.17065	1.49173		1.12119	1.21084		1.53446	1.72479		2.43248	2.09775			1.07262	1.09552		2.17045	1.03577		2.0561	1.10564		1.94864	1.1918
1516 ms	0.447062	0.945542		0.563419	0.847305		0.541742	0.832156		0.398396	0.639702			1.16886	1.49273		1.12033	1.21069		1.53309	1.72451		2.43072	2.09742			1.07243	1.09459		2.1694	1.03597		2.05431	1.10569		1.94747	1.19142
1517 ms	0.447119	0.945252		0.5631	0.84719		0.54111	0.831977		0.398156	0.639585			1.16821	1.49224		1.11958	1.2106		1.53214	1.72411		2.42916	2.09678			1.07163	1.09471		2.16786	1.03656		2.0527	1.10615		1.94648	1.19127
1518 ms	0.447162	0.945594		0.562867	0.847081		0.540626	0.831798		0.397874	0.639377			1.16748	1.49189		1.1187	1.21079		1.53119	1.72362		2.42767	2.09611			1.07156	1.09495		2.16713	1.03674		2.05112	1.10649		1.94564	1.19039
1519 ms	0.447353	0.945158		0.562544	0.846838		0.540067	0.831621		0.397664	0.639187			1.1643	1.49385		1.11822	1.21058		1.53051	1.72316		2.42538	2.09642			1.07085	1.09488		2.16541	1.03721		2.0502	1.10654		1.94439	1.18973
1520 ms	0.447594	0.94541		0.562235	0.846751		0.539577	0.83136		0.397333	0.638879			1.16107	1.49733		1.11729	1.21071		1.52935	1.72285		2.42327	2.09684			1.07121	1.09451		2.16402	1.03738		2.04873	1.10663		1.94361	1.18927
1521 ms	0.447766	0.945117		0.561723	0.846493		0.539158	0.831065		0.397061	0.638567			1.1705	1.48775		1.11646	1.21073		1.52838	1.72242		2.42428	2.09372			1.07064	1.09465		2.16255	1.03765		2.04733	1.10738		1.94295	1.18893
1522 ms	0.44823	0.945521		0.561308	0.846363		0.538782	0.830662		0.396753	0.638225			1.18203	1.48586		1.11528	1.21069		1.52718	1.72188		2.42575	2.09142			1.07022	1.09488		2.16099	1.03829		2.04612	1.10697		1.94156	1.18875
1523 ms	0.448381	0.945161		0.560869	0.846194		0.538623	0.830508		0.39652	0.638082			1.19024	1.49218		1.11458	1.21069		1.52646	1.7216		2.42534	2.09068			1.07004	1.09515		2.16051	1.03713		2.04439	1.10699		1.93999	1.18888
1524 ms	0.448319	0.945099		0.560469	0.845936		0.538446	0.830327		0.396256	0.637959			1.19676	1.50071		1.11389	1.2105		1.52546	1.7213		2.42503	2.09078			1.06952	1.09524		2.15984	1.03622		2.0426	1.10732		1.93833	1.18873
1525 ms	0.448323	0.945088		0.560255	0.8458		0.538146	0.830118		0.396003	0.637889			1.2017	1.51093		1.11357	1.21012		1.52445	1.72103		2.4245	2.09142			1.06838	1.09455		2.15819	1.03595		2.04124	1.10748		1.93684	1.18857
1526 ms	0.448045	0.945308		0.559859	0.84563		0.537909	0.829908		0.395678	0.637803			1.20669	1.5213		1.11253	1.2101		1.52313	1.72052		2.42374	2.09211			1.06757	1.09494		2.15711	1.03588		2.03935	1.10749		1.93581	1.18879
1527 ms	0.447873	0.945375		0.559474	0.845532		0.537587	0.829612		0.395376	0.637616			1.21055	1.53208		1.11178	1.20996		1.52221	1.72016		2.42285	2.0929			1.06658	1.09428		2.15623	1.03608		2.03776	1.10709		1.93472	1.18859
1528 ms	0.447594	0.945453		0.559164	0.845413		0.537138	0.829524		0.395174	0.637634			1.20129	1.50991		1.11117	1.20991		1.52099	1.71964		2.41921	2.09006			1.0662	1.09361		2.15461	1.03627		2.03638	1.10673		1.93321	1.18863
1529 ms	0.447191	0.945346		0.558718	0.845485		0.536642	0.829296		0.394882	0.637498			1.19234	1.49476		1.11082	1.20968		1.51999	1.71917		2.41578	2.08815			1.06563	1.09312		2.15345	1.03618		2.03472	1.10745		1.9316	1.18875
1530 ms	0.446836	0.945316		0.558456	0.845283		0.536045	0.829052		0.394616	0.637347			1.18597	1.48717		1.10984	1.20967		1.51906	1.71847		2.41326	2.08743			1.06461	1.09329		2.15122	1.03755		2.03343	1.10775		1.93093	1.18818
1531 ms	0.446789	0.945312		0.558119	0.845137		0.535459	0.828832		0.394359	0.637159			1.18209	1.48457		1.10928	1.20989		1.51809	1.71802		2.41097	2.08687			1.0645	1.09267		2.14912	1.03893		2.03201	1.10755		1.93008	1.18765
1532 ms	0.446655	0.945041		0.557391	0.845009		0.535009	0.828753		0.39411	0.637041			1.1796	1.48369		1.10829	1.20985		1.51722	1.71735		2.40896	2.08598			1.06465	1.09241		2.14787	1.03967		2.03026	1.10744		1.92916	1.18773
1533 ms	0.446429	0.944878		0.556993	0.844836		0.53443	0.828676		0.393871	0.636913			1.1776	1.48342		1.10748	1.20977		1.51644	1.71721		2.40742	2.08519			1.06462	1.09109		2.14671	1.04041		2.02815	1.10769		1.92744	1.18736
1534 ms	0.446187	0.944277		0.556663	0.844616		0.533939	0.82863		0.393629	0.636894			1.17617	1.48288		1.10665	1.20964		1.51567	1.7168		2.40592	2.08453			1.06432	1.09095		2.14527	1.04067		2.0268	1.10798		1.92588	1.18712
1535 ms	0.446303	0.944198		0.556365	0.844578		0.533547	0.828357		0.39337	0.636857			1.17488	1.48346		1.10573	1.20967		1.51483	1.7166		2.40457	2.08418			1.06303	1.09095		2.14436	1.04077		2.02479	1.10759		1.92493	1.18687
1536 ms	0.446482	0.943657		0.55622	0.844199		0.533154	0.828281		0.393101	0.636787			1.17423	1.48335		1.10491	1.20973		1.51402	1.71618		2.40319	2.08371			1.06197	1.0909		2.14234	1.04099		2.02285	1.10752		1.92412	1.18622
1537 ms	0.446796	0.943617		0.555796	0.844087		0.532958	0.828079		0.392875	0.636751			1.17415	1.48381		1.10415	1.20955		1.51286	1.71588		2.40186	2.08326			1.06192	1.09005		2.14052	1.04159		2.02147	1.10747		1.92274	1.18631
1538 ms	0.446906	0.943507		0.55542	0.844051		0.532661	0.827811		0.392673	0.636717			1.17388	1.48352		1.10304	1.20939		1.51188	1.71545		2.40034	2.08251			1.06088	1.09018		2.13943	1.04142		2.01947	1.10715		1.92116	1.18659
1539 ms	0.447289	0.943498		0.555196	0.843857		0.532327	0.827445		0.39249	0.636551			1.1735	1.48313		1.10239	1.20935		1.51093	1.71518		2.39889	2.08212			1.06003	1.08927		2.13839	1.04164		2.01774	1.10727		1.91995	1.18623
1540 ms	0.44779	0.943406		0.555016	0.843759		0.532075	0.827143		0.392304	0.636479			1.17234	1.48237		1.10171	1.20913		1.51007	1.71465		2.39732	2.08166			1.05942	1.08955		2.13637	1.042		2.01654	1.1072		1.91944	1.18617
1541 ms	0.448032	0.943799		0.554639	0.843635		0.531791	0.826935		0.392115	0.6364			1.1727	1.48226		1.10121	1.20903		1.50905	1.71421		2.39565	2.08126			1.05874	1.08927		2.13468	1.04282		2.01532	1.10735		1.91803	1.18593
1542 ms	0.44786	0.943539		0.554546	0.843498		0.531455	0.826788		0.391832	0.636128			1.17297	1.48255		1.10032	1.20908		1.50815	1.71386		2.39409	2.08089			1.05885	1.08935		2.13347	1.04338		2.01362	1.10789		1.91724	1.18603
1543 ms	0.447518	0.943362		0.554166	0.843266		0.531204	0.82658		0.391695	0.63616			1.17339	1.4828		1.09983	1.20897		1.50739	1.71357		2.39257	2.08034			1.0589	1.08881		2.13241	1.04371		2.01177	1.10759		1.91624	1.1861
1544 ms	0.447221	0.943282		0.553939	0.843189		0.530807	0.826405		0.391405	0.635959			1.17322	1.4833		1.09924	1.20908		1.50645	1.71303		2.39096	2.07965			1.05794	1.08857		2.13173	1.0435		2.00989	1.1078		1.91477	1.18576
1545 ms	0.446876	0.942832		0.553549	0.843008		0.530469	0.826253		0.391124	0.63577			1.17283	1.48399		1.09861	1.20896		1.50554	1.7125		2.38942	2.07941			1.05737	1.08814		2.13054	1.04371		2.00886	1.10782		1.91401	1.18517
1546 ms	0.446185	0.94276		0.553329	0.842823		0.530189	0.826205		0.390775	0.635692			1.17172	1.48404		1.09779	1.20887		1.50458	1.71221		2.38776	2.07889			1.05685	1.08789		2.12922	1.04397		2.00759	1.10745		1.91282	1.18528
1547 ms	0.445386	0.942834		0.5528	0.842827		0.529783	0.826126		0.390466	0.635517			1.17195	1.48375		1.09708	1.20915		1.50375	1.71167		2.38591	2.07873			1.05677	1.08728		2.12851	1.04374		2.00608	1.10726		1.91142	1.18521
1548 ms	0.445049	0.942513		0.552458	0.842755		0.529385	0.826088		0.390184	0.63536			1.1707	1.48434		1.09641	1.2091		1.5028	1.71102		2.3843	2.07831			1.05631	1.0872		2.12746	1.04295		2.00383	1.10706		1.91046	1.18563
1549 ms	0.444819	0.942632		0.551933	0.842695		0.528877	0.826008		0.389934	0.635315			1.17071	1.48441		1.09607	1.20879		1.50238	1.71024		2.38281	2.07783			1.0548	1.08703		2.12561	1.04313		2.00259	1.1067		1.90877	1.18542
1550 ms	0.444889	0.943079		0.551572	0.84276		0.528404	0.82587		0.389684	0.635129			1.17023	1.48446		1.09482	1.20856		1.50141	1.70972		2.38144	2.07757			1.05414	1.0872		2.12425	1.04319		2.00114	1.1067		1.90765	1.18545
1551 ms	0.444681	0.942999		0.551321	0.842437		0.528014	0.825838		0.389422	0.634983			1.17023	1.48409		1.09405	1.20836		1.50065	1.70939		2.38006	2.07759			1.05327	1.08724		2.12298	1.04344		1.99953	1.10658		1.9068	1.18582
1552 ms	0.444504	0.94356		0.551012	0.842366		0.527652	0.825644		0.389206	0.634971			1.17012	1.48346		1.09308	1.20822		1.49985	1.70905		2.37891	2.07728			1.05206	1.08672		2.12159	1.04364		1.99766	1.10703		1.90542	1.18575
1553 ms	0.444692	0.943222		0.55076	0.842159		0.527132	0.825398		0.38899	0.634773			1.17103	1.48374		1.09221	1.20819		1.4991	1.70859		2.37771	2.07734			1.05104	1.08683		2.1204	1.0437		1.99577	1.10754		1.9043	1.18572
1554 ms	0.444964	0.943341		0.550561	0.84197		0.526824	0.825142		0.388788	0.634683			1.17165	1.48419		1.09131	1.20773		1.49827	1.70835		2.37658	2.07676			1.04956	1.08657		2.11862	1.0439		1.99438	1.10842		1.90316	1.18515
1555 ms	0.445355	0.943115		0.550365	0.841766		0.52644	0.824926		0.388646	0.634622			1.1721	1.48358		1.0904	1.20757		1.49722	1.70792		2.37514	2.07625			1.04939	1.08655		2.11759	1.04429		1.993	1.10879		1.90274	1.18461
1556 ms	0.445691	0.943362		0.550168	0.841613		0.526175	0.82462		0.388411	0.634432			1.17185	1.4834		1.08948	1.20741		1.49606	1.70769		2.37395	2.07586			1.04982	1.0855		2.11659	1.04441		1.99116	1.10951		1.9021	1.1842
1557 ms	0.445862	0.943235		0.549682	0.841376		0.525903	0.82456		0.388136	0.634215			1.17136	1.4833		1.08916	1.20746		1.49516	1.70711		2.37224	2.07552			1.04874	1.08501		2.11527	1.04439		1.98996	1.10966		1.90095	1.18403
1558 ms	0.446235	0.943451		0.549382	0.841369		0.525576	0.824333		0.38797	0.634253			1.17051	1.48373		1.08842	1.20743		1.49428	1.70662		2.37081	2.07491			1.04839	1.08395		2.11352	1.04427		1.98839	1.10951		1.89998	1.18348
1559 ms	0.446243	0.943099		0.54914	0.841148		0.525098	0.824252		0.387679	0.633975			1.17023	1.48414		1.0878	1.20734		1.49346	1.70622		2.36908	2.07467			1.04898	1.08367		2.11252	1.04397		1.98695	1.10961		1.8995	1.18362
1560 ms	0.445906	0.943338		0.548868	0.841036		0.524867	0.824092		0.387382	0.63388			1.16986	1.48402		1.08753	1.20725		1.49248	1.70582		2.36762	2.07421			1.04948	1.08327		2.11132	1.04362		1.98478	1.10942		1.89835	1.18318
1561 ms	0.44603	0.943349		0.548559	0.840846		0.52442	0.823903		0.387091	0.633772			1.16916	1.48423		1.0872	1.20724		1.49141	1.70536		2.36615	2.07398			1.04908	1.08314		2.11021	1.04389		1.98312	1.10947		1.8975	1.18315
1562 ms	0.445248	0.943427		0.547937	0.840587		0.524073	0.823811		0.386755	0.633546			1.16923	1.48438		1.08637	1.20719		1.49059	1.70487		2.36416	2.07421			1.04762	1.08271		2.10841	1.04402		1.98162	1.10963		1.89595	1.18292
1563 ms	0.445119	0.94325		0.547245	0.840347		0.523691	0.823729		0.386564	0.633513			1.16888	1.48445		1.08531	1.20719		1.48959	1.70452		2.36183	2.07455			1.04738	1.08309		2.10731	1.0437		1.98048	1.10934		1.89492	1.18289
1564 ms	0.444547	0.942769		0.546912	0.840152		0.523257	0.823655		0.386362	0.633575			1.169	1.48443		1.08448	1.20708		1.48861	1.70425		2.35967	2.07484			1.04739	1.0823		2.10635	1.04343		1.97847	1.10946		1.89426	1.18274
1565 ms	0.444129	0.942555		0.546187	0.840046		0.52282	0.82366		0.38603	0.633234			1.16932	1.48446		1.0839	1.20701		1.4877	1.70368		2.35759	2.07549			1.04647	1.08275		2.10525	1.04361		1.97703	1.10987		1.89327	1.18325
1566 ms	0.443597	0.942564		0.54565	0.839823		0.522438	0.823577		0.385805	0.633173			1.16891	1.485		1.08323	1.20709		1.48686	1.70314		2.35554	2.07621			1.04564	1.08292		2.10386	1.04379		1.97529	1.11012		1.8919	1.18328
1567 ms	0.443571	0.942489		0.54489	0.839511		0.521964	0.82355		0.385638	0.63309			1.16875	1.48533		1.0821	1.20697		1.4858	1.70272		2.3534	2.07701			1.04413	1.08297		2.10227	1.04361		1.97397	1.11103		1.89102	1.18345
1568 ms	0.443563	0.942396		0.544444	0.839421		0.521497	0.82348		0.385434	0.632911			1.1676	1.48552		1.08122	1.20718		1.48501	1.70235		2.35113	2.078			1.04347	1.08294		2.10096	1.04274		1.97187	1.11089		1.89023	1.18388
1569 ms	0.443788	0.942484		0.544166	0.839316		0.521128	0.823312		0.385259	0.632842			1.16664	1.48633		1.08039	1.20713		1.48423	1.7022		2.34969	2.07795			1.04325	1.08279		2.09992	1.04272		1.97002	1.11093		1.88944	1.1842
1570 ms	0.443521	0.94257		0.543947	0.838947		0.520742	0.823175		0.384945	0.632665			1.16616	1.48666		1.07962	1.20717		1.48342	1.70165		2.34839	2.07753			1.04196	1.08245		2.09787	1.04306		1.96804	1.11122		1.88813	1.18407
1571 ms	0.443709	0.942688		0.543693	0.838706		0.520449	0.822991		0.384704	0.632505			1.16525	1.48774		1.07874	1.20701		1.48269	1.70108		2.34722	2.07752			1.04076	1.08268		2.09639	1.04336		1.96688	1.11138		1.88651	1.18397
1572 ms	0.444049	0.942705		0.543647	0.838569		0.520072	0.822804		0.384534	0.632527			1.16462	1.48823		1.07799	1.20676		1.48162	1.70078		2.3455	2.07724			1.04057	1.08269		2.09538	1.04348		1.96512	1.11136		1.88555	1.18389
1573 ms	0.444648	0.942568		0.543283	0.838314		0.519787	0.82266		0.384359	0.632537			1.16399	1.48847		1.07729	1.20674		1.48043	1.70049		2.34392	2.07675			1.03992	1.08209		2.09391	1.04361		1.96391	1.11119		1.88507	1.18369
1574 ms	0.444707	0.942264		0.543138	0.838515		0.519398	0.822458		0.384092	0.63252			1.16309	1.48793		1.07662	1.20649		1.4797	1.70001		2.34225	2.07612			1.03991	1.0813		2.09239	1.04383		1.96226	1.11097		1.88464	1.18371
1575 ms	0.444394	0.942226		0.542731	0.838097		0.519197	0.822362		0.383872	0.632537			1.16245	1.48829		1.0757	1.20626		1.47877	1.69948		2.34073	2.0757			1.039	1.08056		2.09086	1.04462		1.96154	1.11031		1.88354	1.18365
1576 ms	0.444386	0.942103		0.542428	0.838005		0.518735	0.822183		0.383674	0.632512			1.16153	1.48799		1.07518	1.20634		1.47759	1.69882		2.33908	2.07513			1.0381	1.08017		2.08984	1.04454		1.95958	1.11044		1.88309	1.18367
1577 ms	0.444451	0.941901		0.541937	0.837921		0.518422	0.822122		0.383475	0.632403			1.16061	1.48822		1.07484	1.20588		1.47665	1.69838		2.33737	2.07501			1.03792	1.08002		2.08883	1.04416		1.95772	1.11039		1.88222	1.18343
1578 ms	0.444191	0.942149		0.541472	0.837753		0.518015	0.822021		0.38323	0.632281			1.16023	1.48698		1.07387	1.20598		1.47562	1.69802		2.33571	2.07448			1.03724	1.07934		2.087	1.04399		1.95565	1.1107		1.88172	1.18322
1579 ms	0.443662	0.942047		0.54105	0.837531		0.517601	0.821791		0.383011	0.632234			1.16016	1.48591		1.07319	1.20592		1.47472	1.69768		2.33441	2.0739			1.03696	1.07882		2.08534	1.04361		1.95462	1.1108		1.88089	1.18282
1580 ms	0.443451	0.941984		0.540521	0.837406		0.517178	0.821751		0.382785	0.632008			1.15982	1.48494		1.07238	1.2057		1.47408	1.69709		2.33289	2.07349			1.03571	1.07843		2.08447	1.04373		1.95277	1.11099		1.87984	1.18266
1581 ms	0.443511	0.942073		0.539994	0.836908		0.516751	0.821624		0.382576	0.631777			1.15971	1.4849		1.07152	1.20583		1.47311	1.69658		2.33183	2.073			1.03505	1.07854		2.08347	1.04406		1.95172	1.11145		1.87824	1.18228
1582 ms	0.443696	0.941866		0.539491	0.836823		0.516182	0.821564		0.382336	0.631633			1.16068	1.48432		1.07055	1.20572		1.47207	1.69625		2.33058	2.07235			1.03571	1.0781		2.08244	1.04388		1.94975	1.11265		1.87739	1.1819
1583 ms	0.443628	0.941608		0.538817	0.836477		0.515708	0.821518		0.382144	0.631598			1.16081	1.4836		1.06961	1.20552		1.47123	1.69584		2.32925	2.07159			1.03549	1.07797		2.08046	1.04417		1.94844	1.11335		1.87586	1.1817
1584 ms	0.443525	0.941132		0.538563	0.83632		0.515185	0.821347		0.381908	0.631482			1.16124	1.48203		1.06875	1.20583		1.47022	1.69558		2.32797	2.07076			1.03451	1.07742		2.07946	1.04407		1.9478	1.11351		1.87481	1.18215
1585 ms	0.443905	0.941052		0.538152	0.836054		0.514745	0.821094		0.381729	0.631413			1.16069	1.48139		1.06861	1.20578		1.4694	1.69527		2.32668	2.07013			1.035	1.07745		2.07858	1.04402		1.94666	1.11349		1.87361	1.18265
1586 ms	0.444148	0.940884		0.537817	0.835523		0.514332	0.820895		0.381477	0.631188			1.16012	1.48055		1.06768	1.20584		1.46885	1.69472		2.32534	2.06969			1.03469	1.07685		2.07745	1.04415		1.94471	1.11383		1.87271	1.18264
1587 ms	0.444142	0.940792		0.537685	0.835195		0.513899	0.820667		0.381231	0.631139			1.1594	1.4795		1.06679	1.20566		1.46763	1.69446		2.32385	2.06928			1.03426	1.07645		2.07554	1.04418		1.94337	1.1138		1.87137	1.18246
1588 ms	0.444158	0.940659		0.537224	0.834933		0.513473	0.820468		0.380977	0.631114			1.15825	1.47815		1.0662	1.20559		1.46689	1.69413		2.32228	2.06874			1.03366	1.07623		2.07395	1.04368		1.94208	1.11352		1.87059	1.18218
1589 ms	0.444003	0.940545		0.53665	0.834632		0.513113	0.82019		0.380775	0.631083			1.15719	1.47644		1.06559	1.20552		1.46626	1.69361		2.3234	2.06425			1.03274	1.07609		2.07256	1.04315		1.94059	1.1133		1.86969	1.18161
1590 ms	0.444459	0.9407		0.536412	0.834431		0.512809	0.819963		0.380509	0.630991			1.15691	1.47452		1.06511	1.20528		1.46591	1.69327		2.32425	2.06181			1.0323	1.07544		2.07182	1.04274		1.93945	1.11299		1.86832	1.1809
1591 ms	0.444432	0.940706		0.535856	0.834194		0.512517	0.819786		0.380357	0.630995			1.1559	1.47423		1.06427	1.20522		1.46521	1.6927		2.32456	2.06084			1.03278	1.07503		2.07057	1.04246		1.93741	1.11378		1.8677	1.18008
1592 ms	0.444269	0.940297		0.535506	0.834111		0.512136	0.819583		0.380168	0.630963			1.15486	1.47294		1.06318	1.20491		1.46414	1.69213		2.32438	2.06031			1.03212	1.07456		2.06917	1.04214		1.93574	1.11378		1.86684	1.17903
1593 ms	0.444176	0.940354		0.534885	0.834136		0.511776	0.819519		0.380028	0.630968			1.15416	1.47142		1.06239	1.20462		1.46332	1.69181		2.324	2.06011			1.03121	1.07421		2.06798	1.04167		1.93462	1.11367		1.86529	1.17873
1594 ms	0.443757	0.940074		0.534167	0.833944		0.51135	0.819354		0.379782	0.630963			1.15403	1.47018		1.06197	1.20443		1.46284	1.69139		2.32359	2.06035			1.0312	1.07381		2.06669	1.04129		1.93348	1.11416		1.86444	1.17869
1595 ms	0.443412	0.94015		0.533685	0.833831		0.511064	0.819384		0.379585	0.630915			1.15346	1.46977		1.06093	1.20436		1.46207	1.69111		2.32285	2.06114			1.02992	1.07355		2.06545	1.04119		1.93186	1.11491		1.86329	1.17911
1596 ms	0.44301	0.939987		0.533683	0.833607		0.510664	0.819173		0.379318	0.630721			1.15211	1.46839		1.06034	1.20406		1.46127	1.6906		2.31941	2.05973			1.02889	1.07365		2.06432	1.04111		1.93033	1.11485		1.86228	1.1796
1597 ms	0.442268	0.939906		0.533267	0.833473		0.510352	0.819085		0.379056	0.63065			1.15078	1.46813		1.05938	1.204		1.46009	1.69036		2.31677	2.0591			1.02906	1.07313		2.06293	1.04121		1.92916	1.11487		1.8618	1.17976
1598 ms	0.442184	0.940077		0.53308	0.833282		0.509898	0.818863		0.378743	0.630462			1.15026	1.46568		1.05872	1.20364		1.45903	1.69015		2.31413	2.05857			1.02837	1.07302		2.06169	1.04184		1.92757	1.11475		1.86086	1.17983
1599 ms	0.442169	0.940174		0.532585	0.832855		0.50943	0.818814		0.378449	0.630255			1.15053	1.46447		1.05811	1.20356		1.45858	1.68985		2.31258	2.05817			1.02788	1.07259		2.06015	1.04214		1.92616	1.11499		1.85942	1.18026
1600 ms	0.442074	0.940101		0.532306	0.832665		0.509103	0.818674		0.378205	0.630305			1.14977	1.46372		1.05735	1.20375		1.45731	1.68944		2.31086	2.05763			1.02756	1.07241		2.05845	1.04255		1.9246	1.1152		1.85923	1.17981
1601 ms	0.442581	0.940444		0.53217	0.832506		0.50895	0.818691		0.378049	0.630181			1.14916	1.46224		1.05654	1.20378		1.4563	1.68909		2.30927	2.05723			1.02734	1.07204		2.05755	1.04238		1.92334	1.115		1.85813	1.17956
1602 ms	0.442712	0.940089		0.532187	0.832123		0.508679	0.818457		0.37785	0.630053			1.14944	1.46054		1.05588	1.20362		1.45522	1.6885		2.30797	2.05666			1.02755	1.07176		2.05632	1.04257		1.92131	1.11491		1.85716	1.17876
1603 ms	0.443214	0.940289		0.531761	0.831913		0.50857	0.818508		0.377697	0.630076			1.14961	1.45992		1.05507	1.2037		1.45444	1.68817		2.30707	2.05618			1.02797	1.07101		2.05522	1.04289		1.91985	1.11559		1.85581	1.17828
1604 ms	0.443577	0.939889		0.531351	0.831653		0.508455	0.818355		0.377491	0.629991			1.14977	1.45828		1.05467	1.20358		1.45366	1.68763		2.30551	2.05555			1.02717	1.07143		2.05425	1.04255		1.91773	1.11606		1.85478	1.17848
1605 ms	0.444068	0.939821		0.530836	0.831183		0.508142	0.818276		0.377322	0.630027			1.14855	1.45741		1.05436	1.20357		1.45303	1.68701		2.30434	2.05493			1.0269	1.07115		2.05325	1.04172		1.91693	1.11608		1.85387	1.17845
1606 ms	0.44383	0.939776		0.53046	0.831079		0.508019	0.818005		0.377108	0.630145			1.14857	1.45604		1.05376	1.20354		1.4521	1.68661		2.3028	2.05451			1.02673	1.071		2.05245	1.04169		1.91524	1.11628		1.85335	1.17794
1607 ms	0.443796	0.939699		0.529985	0.830839		0.50784	0.817823		0.376846	0.629995			1.14804	1.45432		1.05288	1.20332		1.45154	1.68627		2.30158	2.05432			1.02711	1.07073		2.05116	1.04112		1.91392	1.11671		1.85191	1.17783
1608 ms	0.443492	0.939299		0.52974	0.830696		0.507528	0.817491		0.376586	0.629976			1.14753	1.4539		1.05192	1.20314		1.45075	1.68573		2.3006	2.05377			1.02698	1.0709		2.04985	1.04063		1.91177	1.11715		1.85127	1.178
1609 ms	0.443462	0.939364		0.529147	0.830655		0.507227	0.817379		0.376426	0.630039			1.14676	1.45276		1.05122	1.20301		1.45013	1.68525		2.29919	2.05337			1.02694	1.07085		2.04867	1.04009		1.91064	1.11688		1.84998	1.1784
1610 ms	0.443043	0.939205		0.528607	0.830596		0.506706	0.817021		0.376135	0.629977			1.14571	1.45132		1.05058	1.20282		1.44904	1.68485		2.29752	2.053			1.02626	1.07078		2.04745	1.0395		1.90931	1.11662		1.84906	1.17839
1611 ms	0.442488	0.939658		0.528295	0.830611		0.506304	0.816939		0.375813	0.629848			1.14489	1.45034		1.04952	1.20267		1.448	1.68441		2.2961	2.05271			1.026	1.06978		2.046	1.03934		1.90834	1.11649		1.84783	1.17756
1612 ms	0.441651	0.939353		0.527998	0.830694		0.506026	0.816843		0.375577	0.629854			1.1463	1.44906		1.04841	1.2028		1.4472	1.68386		2.29483	2.05233			1.02448	1.06911		2.0442	1.03958		1.9065	1.11647		1.84648	1.17691
1613 ms	0.441439	0.939438		0.527774	0.830434		0.505575	0.816806		0.375312	0.629663			1.14629	1.4474		1.04763	1.2026		1.44642	1.68339		2.29337	2.05204			1.02334	1.06833		2.04286	1.03919		1.9052	1.11637		1.84542	1.17652
1614 ms	0.441125	0.939265		0.527579	0.830208		0.505145	0.816656		0.375071	0.629533			1.1462	1.44648		1.04696	1.20242		1.44564	1.68274		2.29211	2.05162			1.0225	1.06769		2.04263	1.03923		1.90303	1.11596		1.84461	1.17625
1615 ms	0.44107	0.939189		0.526976	0.829897		0.504722	0.816626		0.374789	0.629376			1.14633	1.4444		1.04638	1.20244		1.44487	1.68235		2.29057	2.05105			1.02168	1.06676		2.04115	1.03943		1.90202	1.11541		1.84344	1.17559
1616 ms	0.441032	0.939355		0.52681	0.829799		0.504304	0.816506		0.374478	0.62917			1.14568	1.44321		1.04563	1.20232		1.44368	1.68196		2.28934	2.05035			1.02163	1.06593		2.03972	1.03974		1.90059	1.11519		1.84264	1.17494
1617 ms	0.441253	0.939181		0.526605	0.8295		0.503929	0.816498		0.374356	0.629095			1.14636	1.44216		1.0446	1.20231		1.44285	1.6816		2.28824	2.04991			1.02165	1.06493		2.03836	1.03922		1.89876	1.11521		1.84171	1.17399
1618 ms	0.441713	0.938883		0.526391	0.829127		0.503523	0.816399		0.37423	0.629066			1.14576	1.4409		1.04386	1.20225		1.44241	1.68095		2.28704	2.04945			1.02092	1.06511		2.03705	1.03892		1.89735	1.11527		1.84095	1.17384
1619 ms	0.441881	0.938917		0.526056	0.829012		0.50324	0.816248		0.374034	0.628838			1.1445	1.43991		1.04338	1.20189		1.44124	1.6805		2.28593	2.04889			1.02135	1.06546		2.03613	1.03896		1.89656	1.11526		1.83988	1.17406
1620 ms	0.442302	0.938357		0.525853	0.828879		0.503044	0.816163		0.373855	0.628781			1.14268	1.43969		1.04244	1.20173		1.44039	1.68018		2.2847	2.04831			1.0207	1.06541		2.03452	1.03875		1.89507	1.11529		1.8387	1.1741
1621 ms	0.44261	0.9383		0.525534	0.82875		0.502787	0.816182		0.373653	0.628681			1.14191	1.43915		1.04152	1.20155		1.43944	1.67977		2.28337	2.04775			1.01992	1.06605		2.03276	1.03882		1.89412	1.11571		1.83744	1.17432
1622 ms	0.442778	0.938531		0.525175	0.828662		0.502552	0.815932		0.373506	0.628605			1.14023	1.43934		1.041	1.20128		1.43844	1.67917		2.28229	2.04726			1.01917	1.06657		2.03194	1.03912		1.89217	1.11635		1.83645	1.17401
1623 ms	0.442888	0.938244		0.524683	0.82843		0.502373	0.815743		0.373319	0.628538			1.1404	1.43811		1.04058	1.20111		1.43772	1.67876		2.2808	2.04696			1.01894	1.06636		2.03123	1.03927		1.89051	1.11662		1.83566	1.17352
1624 ms	0.442566	0.938101		0.52423	0.828308		0.502206	0.815655		0.372979	0.628531			1.13981	1.43709		1.04002	1.20086		1.43679	1.67819		2.27962	2.04628			1.01775	1.06664		2.0298	1.04021		1.8895	1.11681		1.83488	1.17398
1625 ms	0.442333	0.938244		0.523594	0.828259		0.502058	0.815418		0.372702	0.628453			1.14004	1.43595		1.03975	1.20075		1.43567	1.67806		2.27813	2.04596			1.0171	1.06632		2.02851	1.04065		1.88845	1.11631		1.83381	1.17402
1626 ms	0.442424	0.938065		0.523182	0.827996		0.501755	0.815191		0.372454	0.628466			1.13868	1.43426		1.03887	1.20063		1.43523	1.67767		2.2767	2.04581			1.0163	1.06593		2.0272	1.04069		1.88633	1.11557		1.83312	1.17351
1627 ms	0.442172	0.938368		0.52258	0.827856		0.501482	0.815025		0.372148	0.62835			1.138	1.43294		1.03859	1.20062		1.43445	1.67703		2.27526	2.04541			1.01581	1.06589		2.0264	1.04113		1.88492	1.1152		1.83207	1.17325
1628 ms	0.441793	0.938353		0.522032	0.827666		0.501151	0.814832		0.37189	0.628269			1.13698	1.43139		1.03838	1.20048		1.43378	1.67684		2.27385	2.04504			1.0157	1.06485		2.02456	1.04131		1.88337	1.11458		1.83114	1.17284
1629 ms	0.441291	0.93799		0.521646	0.827458		0.500793	0.814678		0.37161	0.628178			1.13659	1.42946		1.03733	1.20029		1.43326	1.67675		2.27228	2.04448			1.01595	1.06435		2.02326	1.04113		1.88215	1.1141		1.8298	1.17273
1630 ms	0.440889	0.937963		0.521208	0.827395		0.500577	0.814672		0.371339	0.628055			1.13599	1.42757		1.03659	1.20026		1.43276	1.6764		2.27092	2.04397			1.01454	1.06486		2.02179	1.04143		1.88099	1.11385		1.8292	1.17326
1631 ms	0.440866	0.938163		0.520863	0.827378		0.500318	0.814493		0.371086	0.62779			1.13454	1.42576		1.03646	1.20028		1.43205	1.67605		2.26962	2.04366			1.01433	1.06426		2.02129	1.04112		1.87928	1.11331		1.82803	1.17256
1632 ms	0.4406	0.93791		0.520751	0.827148		0.499702	0.814216		0.370846	0.62765			1.13397	1.4244		1.03565	1.20015		1.43133	1.6755		2.26863	2.04304			1.01337	1.06377		2.0199	1.04132		1.87734	1.11338		1.82685	1.17234
1633 ms	0.440502	0.938362		0.520498	0.827113		0.499418	0.814206		0.37064	0.627543			1.1335	1.42336		1.03492	1.19993		1.43025	1.67508		2.26732	2.04249			1.01254	1.06294		2.01856	1.04106		1.87649	1.11402		1.82549	1.1721
1634 ms	0.44064	0.938156		0.520211	0.826869		0.498934	0.81396		0.370537	0.627331			1.1333	1.4222		1.03421	1.19977		1.42947	1.67479		2.26623	2.04178			1.01238	1.06308		2.01757	1.04104		1.87501	1.11407		1.8242	1.17224
1635 ms	0.440871	0.938363		0.52001	0.826806		0.4986	0.81377		0.370438	0.627357			1.13287	1.42116		1.03356	1.19967		1.42867	1.67407		2.26515	2.04106			1.0117	1.06263		2.01697	1.04146		1.8737	1.11359		1.82329	1.17172
1636 ms	0.441231	0.938555		0.519828	0.826725		0.498348	0.813663		0.370329	0.627337			1.13156	1.41997		1.033	1.19958		1.42751	1.67341		2.26392	2.04093			1.01015	1.06192		2.0154	1.04152		1.87255	1.11287		1.82277	1.17154
1637 ms	0.441543	0.938779		0.519497	0.826496		0.497888	0.813339		0.370224	0.627311			1.13053	1.41887		1.03235	1.19942		1.42677	1.67302		2.26293	2.04038			1.00962	1.06065		2.01427	1.04143		1.87139	1.11241		1.8214	1.17065
1638 ms	0.441922	0.938654		0.519234	0.826296		0.497663	0.81314		0.37011	0.627254			1.12972	1.41829		1.03139	1.1993		1.42587	1.67257		2.26175	2.03973			1.00872	1.06103		2.01236	1.04202		1.8699	1.11215		1.8205	1.17081
1639 ms	0.442348	0.938716		0.518924	0.826295		0.497711	0.81298		0.369974	0.627203			1.12809	1.41654		1.03065	1.19917		1.4253	1.67214		2.26047	2.03937			1.00902	1.06046		2.01103	1.04204		1.86849	1.11185		1.81992	1.17031
1640 ms	0.44263	0.938396		0.518377	0.826153		0.497448	0.812665		0.369745	0.627066			1.12727	1.41478		1.02995	1.19918		1.42457	1.67193		2.25924	2.03888			1.00858	1.06043		2.00966	1.0422		1.86649	1.11158		1.81904	1.17037
1641 ms	0.442439	0.938832		0.517855	0.826186		0.497165	0.812545		0.369434	0.62707			1.12596	1.41325		1.02909	1.19895		1.42353	1.67167		2.25783	2.03852			1.00818	1.05963		2.00777	1.04198		1.86597	1.1105		1.81844	1.16997
1642 ms	0.442601	0.938447		0.517351	0.826123		0.496874	0.812232		0.369169	0.626929			1.12587	1.41175		1.02838	1.19897		1.42296	1.67152		2.25642	2.03825			1.00722	1.05996		2.00623	1.04149		1.8645	1.11071		1.81768	1.17035
1643 ms	0.44272	0.938448		0.517033	0.826034		0.496523	0.812028		0.368895	0.62687			1.12532	1.40989		1.02819	1.19875		1.42243	1.67106		2.25522	2.03749			1.00715	1.05962		2.00545	1.04144		1.86364	1.11041		1.81643	1.1702
1644 ms	0.442252	0.938132		0.516718	0.826002		0.496247	0.81177		0.368536	0.62672			1.12409	1.4088		1.02757	1.19882		1.42141	1.67057		2.25406	2.03719			1.00683	1.0593		2.00397	1.04106		1.86237	1.11001		1.81558	1.17024
1645 ms	0.441935	0.938033		0.516273	0.825973		0.495959	0.811532		0.368263	0.626595			1.12291	1.40701		1.02693	1.19873		1.42076	1.67038		2.25251	2.03685			1.0067	1.05901		2.00271	1.04085		1.86191	1.1094		1.81461	1.17018
1646 ms	0.441562	0.938164		0.515773	0.82586		0.495688	0.811496		0.368015	0.626513			1.12205	1.40588		1.02627	1.19878		1.41965	1.67021		2.25128	2.03628			1.00595	1.0594		2.00173	1.04024		1.86115	1.10895		1.81343	1.17036
1647 ms	0.441181	0.938236		0.515423	0.825933		0.495363	0.811341		0.367769	0.626344			1.12073	1.40473		1.02602	1.19864		1.41913	1.66994		2.24995	2.03571			1.00528	1.05926		2.00028	1.04036		1.85989	1.10836		1.81261	1.16981
1648 ms	0.441112	0.937689		0.51517	0.825819		0.495176	0.811089		0.367577	0.626227			1.11977	1.40296		1.02556	1.19873		1.4186	1.66947		2.24877	2.03527			1.00463	1.05876		1.99942	1.04044		1.85862	1.10864		1.81191	1.16944
1649 ms	0.440599	0.93773		0.51489	0.825867		0.49492	0.81111		0.367384	0.626164			1.11827	1.40139		1.02492	1.19858		1.41791	1.66901		2.24742	2.03504			1.00496	1.05801		1.99807	1.04062		1.85771	1.10821		1.81078	1.16863
1650 ms	0.440209	0.937808		0.514564	0.825916		0.494579	0.810821		0.36719	0.626025			1.11774	1.40018		1.02411	1.19882		1.417	1.66882		2.24616	2.03479			1.00437	1.05858		1.99647	1.04076		1.85627	1.10817		1.80967	1.16825
1651 ms	0.440278	0.937713		0.514041	0.825573		0.494311	0.810863		0.367099	0.625964			1.11652	1.39884		1.0235	1.19867		1.41608	1.66872		2.2446	2.03405			1.00414	1.05842		1.9954	1.04046		1.85466	1.10787		1.80849	1.16798
1652 ms	0.440066	0.93782		0.513759	0.825381		0.493894	0.81062		0.366948	0.625973			1.11554	1.39706		1.02328	1.19857		1.41544	1.66831		2.24337	2.03337			1.00433	1.05807		1.99416	1.04003		1.85305	1.10757		1.80728	1.1672
1653 ms	0.440247	0.937525		0.513545	0.825179		0.493538	0.810426		0.366811	0.625883			1.11492	1.3954		1.02279	1.19839		1.41492	1.66766		2.24215	2.0327			1.00472	1.05782		1.99293	1.04051		1.85203	1.10709		1.80672	1.16661
1654 ms	0.440117	0.937559		0.513051	0.824829		0.493207	0.810264		0.366679	0.625956			1.11439	1.39433		1.02197	1.19831		1.41398	1.66712		2.24095	2.03211			1.00426	1.05783		1.99157	1.04003		1.85149	1.1065		1.80552	1.16631
1655 ms	0.440221	0.93785		0.512592	0.824792		0.49294	0.810116		0.366509	0.625844			1.11403	1.39289		1.02135	1.19807		1.41328	1.6666		2.23989	2.03154			1.0048	1.0575		1.99044	1.03946		1.85022	1.10589		1.80465	1.16589
1656 ms	0.440549	0.937797		0.512061	0.824511		0.492717	0.80993		0.366299	0.625725			1.11254	1.39124		1.02058	1.19796		1.41253	1.66637		2.23868	2.0306			1.00458	1.05796		1.98995	1.03906		1.84911	1.10594		1.80381	1.16594
1657 ms	0.440914	0.93751		0.511525	0.824215		0.492548	0.809819		0.366147	0.625738			1.11185	1.38999		1.01988	1.19783		1.41199	1.666		2.23735	2.02973			1.00501	1.05789		1.98905	1.03875		1.84827	1.10594		1.80307	1.16589
1658 ms	0.44088	0.937751		0.511357	0.824228		0.492325	0.80951		0.365917	0.62577			1.11126	1.38887		1.01928	1.19775		1.41162	1.66553		2.23631	2.02916			1.00514	1.05821		1.98822	1.03897		1.84716	1.10599		1.80257	1.16566
1659 ms	0.441067	0.937549		0.511044	0.823943		0.492078	0.809442		0.365739	0.62577			1.11081	1.38769		1.01851	1.19758		1.41068	1.66524		2.23494	2.02895			1.00478	1.0579		1.9875	1.03887		1.84621	1.10533		1.80226	1.16531
1660 ms	0.440762	0.937921		0.51045	0.823815		0.491795	0.809187		0.365524	0.625785			1.11004	1.38627		1.01811	1.19759		1.40995	1.66524		2.23352	2.02847			1.0047	1.05804		1.98696	1.03863		1.84446	1.10538		1.80152	1.16491
1661 ms	0.440886	0.938083		0.510345	0.823702		0.491633	0.808963		0.365356	0.625713			1.10887	1.38496		1.0176	1.19762		1.40919	1.66496		2.23195	2.02808			1.0055	1.05819		1.98628	1.03888		1.84284	1.10583		1.80104	1.16484
1662 ms	0.440336	0.938043		0.509972	0.823547		0.491475	0.808909		0.365131	0.625683			1.10801	1.38345		1.0173	1.1978		1.4083	1.66484		2.23039	2.02791			1.00487	1.05882		1.98521	1.03982		1.84166	1.1063		1.80009	1.16472
1663 ms	0.440068	0.938584		0.509885	0.823446		0.491299	0.808653		0.364931	0.625704			1.10794	1.38174		1.01735	1.19769		1.40724	1.66455		2.22908	2.02753			1.00498	1.05859		1.98433	1.04009		1.8403	1.10578		1.799	1.16418
1664 ms	0.439284	0.938807		0.509615	0.823356		0.490893	0.808452		0.364619	0.625563			1.10662	1.38072		1.0169	1.19776		1.40656	1.66445		2.22801	2.02735			1.0046	1.05836		1.98338	1.04059		1.83882	1.10487		1.79792	1.16407
1665 ms	0.43929	0.939078		0.509236	0.823377		0.490513	0.808353		0.364447	0.625471			1.10599	1.37927		1.0166	1.19783		1.40558	1.66403		2.22656	2.02719			1.00386	1.05867		1.98185	1.04129		1.83823	1.10438		1.79672	1.16386
1666 ms	0.439124	0.939374		0.508895	0.823622		0.490211	0.8082		0.36425	0.625216			1.10544	1.37799		1.01615	1.19811		1.40492	1.66358		2.22548	2.02632			1.00348	1.05898		1.98048	1.04167		1.83678	1.10495		1.79565	1.16356
1667 ms	0.438937	0.939205		0.508609	0.823355		0.489783	0.808159		0.364093	0.625133			1.10429	1.37682		1.01537	1.19805		1.40411	1.66317		2.22435	2.02579			1.00171	1.05945		1.97895	1.04222		1.83574	1.10476		1.79431	1.16348
1668 ms	0.438697	0.938933		0.508234	0.822997		0.489384	0.808017		0.363908	0.625024			1.10382	1.37512		1.01475	1.19781		1.40371	1.6629		2.22343	2.02512			1.00158	1.05918		1.97828	1.04217		1.83473	1.10422		1.7936	1.16311
1669 ms	0.438902	0.938968		0.508123	0.822768		0.488949	0.807833		0.363777	0.625036			1.10302	1.37415		1.01388	1.19771		1.40289	1.66267		2.22255	2.02423			1.00133	1.05936		1.97741	1.04194		1.83291	1.10379		1.79293	1.16267
1670 ms	0.438811	0.938764		0.507628	0.822619		0.488432	0.807608		0.363604	0.624821			1.10145	1.37302		1.01296	1.1977		1.40227	1.6625		2.22144	2.02365			1.00045	1.05954		1.97605	1.04192		1.8321	1.10347		1.79238	1.16281
1671 ms	0.439232	0.93896		0.507411	0.822538		0.488341	0.807505		0.363513	0.62466			1.10065	1.3713		1.01233	1.19757		1.40171	1.66207		2.21988	2.02307			1.0003	1.05974		1.97488	1.04236		1.83029	1.10373		1.79187	1.16283
1672 ms	0.439332	0.938583		0.506855	0.822205		0.488135	0.807289		0.363324	0.624528			1.0991	1.36942		1.01166	1.19742		1.40091	1.66182		2.21844	2.0225			1.0002	1.06014		1.97391	1.04258		1.82852	1.10348		1.79118	1.16247
1673 ms	0.439235	0.938735		0.506531	0.821969		0.487946	0.807202		0.363115	0.624536			1.09815	1.368		1.0112	1.19714		1.40011	1.6616		2.21721	2.02228			0.99973	1.06072		1.97292	1.04299		1.82744	1.1031		1.79062	1.16239
1674 ms	0.439505	0.938792		0.5061	0.821813		0.48763	0.806997		0.362903	0.62442			1.0977	1.36683		1.01025	1.19711		1.3992	1.66128		2.21574	2.02178			1.00022	1.05986		1.97233	1.04284		1.82668	1.10271		1.79002	1.1622
1675 ms	0.439614	0.938761		0.505897	0.821854		0.487519	0.806858		0.362708	0.624318			1.09706	1.36616		1.00981	1.19714		1.39824	1.66093		2.21443	2.02119			0.999995	1.05996		1.97168	1.0433		1.82566	1.10202		1.78892	1.16208
1676 ms	0.439557	0.938766		0.505509	0.821781		0.487313	0.80668		0.362471	0.624253			1.09566	1.36524		1.00907	1.19697		1.39781	1.66061		2.21296	2.02085			0.999295	1.05951		1.97042	1.04356		1.82538	1.10148		1.78786	1.16186
1677 ms	0.439423	0.938458		0.505137	0.82148		0.487106	0.806486		0.362203	0.624144			1.09499	1.36381		1.00851	1.19696		1.39706	1.66015		2.21149	2.02047			0.998821	1.05977		1.96926	1.04419		1.82401	1.10137		1.78686	1.16179
1678 ms	0.439098	0.938053		0.504663	0.821029		0.486718	0.806315		0.361976	0.624081			1.09399	1.36296		1.00775	1.19671		1.39626	1.65986		2.21025	2.0201			0.998617	1.06015		1.96882	1.04387		1.82351	1.10117		1.7861	1.16102
1679 ms	0.438712	0.938104		0.504451	0.820918		0.486542	0.806168		0.36178	0.623963			1.09405	1.36138		1.00686	1.19646		1.39565	1.65953		2.20904	2.01942			0.998106	1.06014		1.96762	1.0444		1.82228	1.10085		1.7853	1.16135
1680 ms	0.438538	0.938013		0.504143	0.820567		0.48632	0.805947		0.361585	0.623755			1.09386	1.36004		1.00588	1.19648		1.39495	1.65932		2.20766	2.01866			0.998011	1.06017		1.96698	1.04479		1.82097	1.10031		1.78444	1.16146
1681 ms	0.438256	0.93768		0.504094	0.82041		0.486148	0.805684		0.361379	0.623552			1.09265	1.35803		1.00539	1.19639		1.39441	1.65907		2.20625	2.01827			0.998391	1.06047		1.96579	1.04476		1.8197	1.10007		1.7834	1.16162
1682 ms	0.437932	0.937855		0.503732	0.820483		0.485774	0.805682		0.361164	0.62344			1.09193	1.35595		1.00437	1.19633		1.39371	1.65878		2.20468	2.01805			0.998441	1.06067		1.96433	1.04522		1.81792	1.0999		1.78252	1.16179
1683 ms	0.437795	0.937689		0.503414	0.82044		0.485466	0.805615		0.361075	0.623277			1.09141	1.35393		1.00392	1.19615		1.39296	1.65838		2.20326	2.01731			0.998344	1.06109		1.96362	1.04524		1.81638	1.09993		1.78224	1.16175
1684 ms	0.437727	0.937708		0.503233	0.820297		0.485243	0.805494		0.360968	0.623163			1.09128	1.35342		1.00318	1.19588		1.39245	1.65802		2.20205	2.01668			0.9978	1.06066		1.96293	1.04529		1.81449	1.09947		1.78123	1.16143
1685 ms	0.437815	0.937873		0.502864	0.820494		0.484965	0.805426		0.360859	0.62311			1.09096	1.35113		1.00292	1.19606		1.39163	1.65766		2.2008	2.01572			0.996772	1.06059		1.96156	1.04623		1.813	1.09917		1.78021	1.16185
1686 ms	0.437891	0.937466		0.502637	0.820328		0.484618	0.805385		0.360655	0.622916			1.08989	1.34989		1.00242	1.19623		1.39104	1.65743		2.19957	2.01505			0.996756	1.06051		1.96059	1.04643		1.81254	1.09907		1.77959	1.16123
1687 ms	0.438088	0.93717		0.50221	0.820112		0.484167	0.805208		0.360507	0.622929			1.08863	1.3484		1.00179	1.19591		1.39051	1.65715		2.19816	2.01458			0.996547	1.06064		1.95988	1.04617		1.81136	1.09868		1.77872	1.16099
1688 ms	0.438352	0.937188		0.50177	0.819979		0.48381	0.805236		0.360382	0.622916			1.08747	1.34724		1.0013	1.1957		1.3898	1.65673		2.19692	2.01365			0.995568	1.06102		1.95921	1.0474		1.8099	1.09843		1.77807	1.16118
1689 ms	0.438685	0.93681		0.501046	0.819511		0.483645	0.805021		0.360228	0.622799			1.08717	1.34586		1.00118	1.19557		1.38902	1.65658		2.19587	2.01267			0.994257	1.06128		1.95874	1.048		1.80893	1.09801		1.77783	1.16134
1690 ms	0.438967	0.937045		0.500601	0.819318		0.483234	0.804738		0.359997	0.622736			1.08612	1.34414		1.00094	1.19546		1.3885	1.65625		2.19449	2.01195			0.993776	1.06206		1.95822	1.0485		1.80762	1.09758		1.77706	1.1617
1691 ms	0.439283	0.936741		0.500072	0.819281		0.482767	0.8046		0.359812	0.622729			1.08501	1.34242		1.00026	1.19575		1.38783	1.65616		2.19328	2.01122			0.993751	1.06232		1.9566	1.04934		1.80662	1.09736		1.77721	1.1617
1692 ms	0.439301	0.936654		0.499886	0.81903		0.482451	0.804448		0.3595	0.622589			1.08445	1.34129		0.999588	1.19549		1.38712	1.65587		2.19229	2.0107			0.993716	1.06266		1.95558	1.0494		1.80521	1.09642		1.77653	1.16158
1693 ms	0.43941	0.936541		0.499413	0.819071		0.482095	0.80408		0.359349	0.622578			1.08388	1.3401		0.99908	1.19521		1.38642	1.65558		2.19095	2.01031			0.993104	1.06321		1.95493	1.04933		1.80371	1.09566		1.77533	1.16196
1694 ms	0.439084	0.936346		0.499096	0.819137		0.481895	0.804019		0.359099	0.622359			1.08294	1.33868		0.998237	1.19535		1.38583	1.65513		2.18972	2.00973			0.992222	1.06279		1.95368	1.04989		1.80257	1.0955		1.77447	1.16226
1695 ms	0.438552	0.936222		0.49873	0.819032		0.481678	0.803884		0.358864	0.622231			1.08348	1.33761		0.997887	1.19534		1.38524	1.65487		2.18859	2.00931			0.992211	1.0635		1.95271	1.05018		1.80135	1.09509		1.77427	1.16161
1696 ms	0.438029	0.936152		0.498708	0.818879		0.481416	0.80375		0.358588	0.622003			1.08241	1.33637		0.997188	1.19545		1.38498	1.6545		2.18712	2.00904			0.992088	1.06396		1.95085	1.05048		1.80036	1.09483		1.77338	1.16095
1697 ms	0.437528	0.935598		0.498355	0.818536		0.481302	0.803712		0.358365	0.621732			1.08215	1.3349		0.996558	1.19544		1.38406	1.65431		2.18591	2.00865			0.992025	1.06439		1.94908	1.05115		1.79903	1.09481		1.77207	1.16053
1698 ms	0.437198	0.93577		0.49812	0.818149		0.481193	0.803724		0.358177	0.621538			1.08154	1.33296		0.996102	1.19525		1.38308	1.65391		2.18472	2.00837			0.991718	1.06504		1.94894	1.05134		1.79842	1.09463		1.77105	1.16045
1699 ms	0.436931	0.935366		0.497615	0.818048		0.481002	0.803704		0.358073	0.621403			1.08075	1.33177		0.995654	1.19524		1.38246	1.65367		2.18336	2.00815			0.991841	1.06511		1.94823	1.0515		1.79763	1.09447		1.77027	1.16024
1700 ms	0.436665	0.935287		0.497392	0.817899		0.480718	0.803629		0.357852	0.621291			1.08068	1.33071		0.994984	1.19526		1.38198	1.65349		2.1826	2.00746			0.991546	1.06525		1.94723	1.05172		1.79642	1.09435		1.76978	1.16013
1701 ms	0.436877	0.935106		0.496977	0.81785		0.480473	0.803499		0.35767	0.621109			1.08063	1.32917		0.994619	1.19502		1.38124	1.6532		2.18156	2.00697			0.991889	1.06594		1.94597	1.0522		1.79554	1.09435		1.76926	1.16005
1702 ms	0.437143	0.934637		0.49678	0.817768		0.480306	0.803328		0.357413	0.620762			1.0795	1.32769		0.993935	1.19504		1.3809	1.65299		2.18028	2.00688			0.991533	1.0662		1.94485	1.05224		1.79455	1.09399		1.76809	1.16051
1703 ms	0.437457	0.934596		0.496599	0.817791		0.479777	0.803154		0.357224	0.620679			1.0784	1.32565		0.993481	1.19476		1.37974	1.65282		2.17897	2.0065			0.991256	1.06621		1.9443	1.05246		1.79321	1.0937		1.76719	1.16066
1704 ms	0.437887	0.934433		0.496358	0.817772		0.4795	0.803166		0.35703	0.620554			1.07754	1.3244		0.992817	1.19477		1.37893	1.65272		2.17781	2.00642			0.991619	1.06596		1.94399	1.05269		1.79223	1.09293		1.76656	1.16087
1705 ms	0.438177	0.934025		0.49598	0.817855		0.47915	0.802956		0.356787	0.620308			1.07717	1.32254		0.992303	1.19462		1.37832	1.65256		2.17664	2.00595			0.992002	1.06633		1.94283	1.05291		1.79121	1.09269		1.76613	1.16073
1706 ms	0.438417	0.93388		0.495833	0.817631		0.478888	0.802838		0.356524	0.620108			1.07616	1.32083		0.991404	1.19451		1.37754	1.65248		2.1755	2.0054			0.991068	1.06713		1.94145	1.05401		1.7891	1.09272		1.76557	1.16077
1707 ms	0.438301	0.933816		0.495674	0.817416		0.478736	0.802769		0.356321	0.619961			1.07455	1.31856		0.991081	1.19452		1.37684	1.65197		2.17398	2.00513			0.990906	1.06739		1.94045	1.05422		1.78803	1.09281		1.76517	1.16049
1708 ms	0.43823	0.933682		0.495571	0.817259		0.478458	0.802709		0.356123	0.619876			1.0737	1.31632		0.990911	1.1946		1.37615	1.65161		2.17191	2.00508			0.989931	1.06817		1.93987	1.05526		1.78629	1.09264		1.76427	1.16018
1709 ms	0.438148	0.93355		0.495315	0.81735		0.478115	0.802579		0.355972	0.619886			1.07309	1.3147		0.990571	1.19441		1.37516	1.65117		2.17009	2.0048			0.98954	1.06846		1.9388	1.05572		1.78503	1.09234		1.76355	1.15969
1710 ms	0.437514	0.933317		0.494831	0.817319		0.478045	0.802558		0.355756	0.619848			1.07246	1.31342		0.990193	1.19419		1.37455	1.65077		2.16873	2.00489			0.989335	1.06851		1.93796	1.05605		1.78411	1.09231		1.763	1.1597
1711 ms	0.436936	0.93328		0.494659	0.817211		0.477811	0.802393		0.355507	0.619586			1.07173	1.31205		0.989608	1.19411		1.37412	1.6505		2.167	2.00475			0.988962	1.06907		1.9371	1.05615		1.78334	1.09218		1.76258	1.15954
1712 ms	0.436402	0.933188		0.494622	0.81716		0.477703	0.802238		0.35528	0.619415			1.07027	1.31081		0.989255	1.19395		1.37341	1.64979		2.1651	2.00501			0.987997	1.06893		1.93578	1.05671		1.78173	1.09133		1.76151	1.15924
1713 ms	0.43564	0.933213		0.494305	0.817046		0.477473	0.802002		0.355006	0.619189			1.06932	1.30899		0.98881	1.19389		1.37275	1.64914		2.1631	2.00553			0.988133	1.06827		1.93525	1.05641		1.78143	1.09142		1.76068	1.15928
1714 ms	0.435566	0.933298		0.494202	0.816964		0.477209	0.802026		0.354763	0.61893			1.06924	1.3078		0.9879	1.19387		1.37172	1.64885		2.16167	2.00619			0.988037	1.06811		1.934	1.05787		1.78062	1.09146		1.75992	1.15913
1715 ms	0.435267	0.932763		0.493838	0.816877		0.476837	0.801857		0.354594	0.61866			1.06791	1.30634		0.987283	1.19385		1.37094	1.64864		2.16034	2.00572			0.987835	1.06767		1.93303	1.05791		1.77948	1.09151		1.75888	1.15927
1716 ms	0.434857	0.932781		0.493486	0.816631		0.476491	0.801794		0.354287	0.61839			1.06684	1.3044		0.98647	1.19388		1.37013	1.64851		2.1592	2.00556			0.987539	1.06738		1.93243	1.05856		1.77847	1.09103		1.75829	1.15905
1717 ms	0.435211	0.932792		0.493352	0.816549		0.476215	0.801544		0.354085	0.618068			1.06704	1.30303		0.985762	1.194		1.36961	1.64819		2.15788	2.0048			0.986893	1.06781		1.93152	1.05939		1.77769	1.09073		1.75749	1.15935
1718 ms	0.435239	0.932477		0.493124	0.816561		0.475961	0.801373		0.353818	0.617983			1.06654	1.30191		0.985205	1.19379		1.3684	1.6474		2.15671	2.00462			0.985807	1.06761		1.93065	1.06048		1.77611	1.09041		1.75664	1.15908
1719 ms	0.435106	0.932391		0.492803	0.816408		0.475559	0.801281		0.353556	0.617845			1.06585	1.3005		0.984467	1.19364		1.36758	1.64725		2.15563	2.00418			0.985705	1.06726		1.92977	1.06076		1.77511	1.09089		1.75618	1.15903
1720 ms	0.435354	0.932243		0.492677	0.816349		0.475192	0.801213		0.353357	0.617725			1.06539	1.29912		0.984136	1.19355		1.36671	1.64703		2.15444	2.00368			0.985575	1.06732		1.92862	1.06096		1.77424	1.09066		1.75568	1.15863
1721 ms	0.43539	0.932091		0.492251	0.816172		0.474766	0.801051		0.353052	0.617468			1.06457	1.29742		0.984003	1.19338		1.36608	1.6465		2.15332	2.00317			0.984836	1.06763		1.92829	1.0605		1.77224	1.09048		1.75483	1.15855
1722 ms	0.435267	0.932087		0.491978	0.815854		0.474562	0.800983		0.352689	0.617347			1.06427	1.29721		0.983606	1.19331		1.36541	1.64591		2.15243	2.00293			0.984647	1.06779		1.92786	1.06077		1.7717	1.08981		1.75442	1.15849
1723 ms	0.435376	0.932368		0.491954	0.815783		0.474448	0.800835		0.352462	0.617171			1.06315	1.29628		0.982974	1.19322		1.36456	1.64551		2.1514	2.00231			0.984585	1.06723		1.92666	1.0606		1.76995	1.09043		1.75387	1.1585
1724 ms	0.435541	0.931903		0.491723	0.815756		0.474134	0.800869		0.352204	0.616997			1.06207	1.29486		0.982583	1.19328		1.36367	1.64504		2.15012	2.00215			0.985332	1.06697		1.92516	1.06107		1.76824	1.09087		1.75339	1.15791
1725 ms	0.435354	0.931863		0.491396	0.815421		0.473783	0.800692		0.351949	0.616732			1.06113	1.29297		0.982198	1.19342		1.36336	1.64483		2.14899	2.0014			0.984965	1.0676		1.92361	1.06189		1.76715	1.09088		1.75256	1.15809
1726 ms	0.435386	0.931739		0.491085	0.815215		0.473482	0.800648		0.351687	0.616437			1.06074	1.29198		0.98174	1.19336		1.36278	1.6447		2.14775	2.00096			0.984372	1.06845		1.92325	1.06205		1.76594	1.0904		1.75134	1.1584
1727 ms	0.435073	0.931712		0.490818	0.815039		0.473269	0.800509		0.351311	0.616099			1.06024	1.29055		0.981267	1.19323		1.36217	1.6442		2.14663	2.00044			0.983435	1.06888		1.9225	1.06249		1.76422	1.0901		1.7506	1.15835
1728 ms	0.43476	0.931374		0.490367	0.814789		0.473242	0.800323		0.35113	0.615981			1.05947	1.28938		0.980622	1.19311		1.3616	1.64411		2.14542	2.00001			0.983518	1.06831		1.9217	1.06295		1.76337	1.08959		1.7497	1.1583
1729 ms	0.434404	0.931398		0.490315	0.814391		0.473027	0.800094		0.350941	0.615809			1.05872	1.28749		0.980139	1.19285		1.36128	1.64403		2.14438	1.99921			0.982837	1.06822		1.91953	1.06341		1.76207	1.08931		1.74877	1.15864
1730 ms	0.434309	0.93121		0.489808	0.814223		0.472733	0.799976		0.350719	0.615652			1.05799	1.28613		0.979689	1.19277		1.36051	1.64389		2.14327	1.99856			0.982216	1.06928		1.9187	1.06436		1.76134	1.08829		1.74768	1.15868
1731 ms	0.433637	0.931003		0.48958	0.813791		0.472538	0.799776		0.350458	0.615481			1.05681	1.2853		0.979036	1.19248		1.36003	1.64362		2.14201	1.99821			0.981254	1.06953		1.9185	1.06446		1.76012	1.08758		1.74648	1.15882
1732 ms	0.433697	0.931092		0.489356	0.813811		0.472279	0.799723		0.350157	0.615205			1.05654	1.28375		0.978336	1.19207		1.3593	1.64333		2.14054	1.99804			0.980747	1.06866		1.91782	1.06421		1.7592	1.08703		1.74567	1.15898
1733 ms	0.433597	0.931118		0.489121	0.813654		0.472058	0.799494		0.349908	0.615089			1.05602	1.28135		0.977805	1.19224		1.35876	1.64283		2.13916	1.99768			0.980421	1.06903		1.91648	1.06483		1.75766	1.08694		1.74517	1.15881
1734 ms	0.433568	0.930655		0.488799	0.813355		0.471672	0.799445		0.349701	0.614925			1.05512	1.28012		0.97723	1.192		1.3583	1.64275		2.13761	1.99727			0.980666	1.06942		1.91542	1.06549		1.75637	1.08688		1.74462	1.15882
1735 ms	0.433955	0.93074		0.488495	0.81316		0.471364	0.799372		0.349435	0.614615			1.05395	1.27806		0.976831	1.19198		1.35767	1.64249		2.13617	1.99672			0.97993	1.07036		1.91402	1.06598		1.75499	1.08723		1.7439	1.15894
1736 ms	0.434081	0.930646		0.487981	0.813288		0.471082	0.799313		0.349098	0.61423			1.05323	1.27658		0.97628	1.192		1.35674	1.64221		2.13482	1.99612			0.979803	1.0711		1.91384	1.06629		1.75395	1.08738		1.74346	1.1583
1737 ms	0.434279	0.930195		0.487547	0.813041		0.470661	0.79909		0.348813	0.613887			1.05323	1.27458		0.975787	1.19192		1.35627	1.64171		2.13325	1.99554			0.979876	1.07074		1.91213	1.06697		1.75303	1.08751		1.74312	1.15866
1738 ms	0.434766	0.930421		0.487238	0.812891		0.470228	0.79907		0.348547	0.613617			1.05326	1.2715		0.97548	1.19194		1.35545	1.64132		2.13221	1.99473			0.979332	1.0715		1.9108	1.06726		1.75155	1.08742		1.74271	1.15875
1739 ms	0.435163	0.929922		0.487013	0.81253		0.469966	0.798934		0.348355	0.613395			1.05258	1.27021		0.974882	1.19199		1.35495	1.64128		2.13135	1.99401			0.979255	1.07201		1.91047	1.06762		1.75061	1.08718		1.74204	1.15824
1740 ms	0.435053	0.929866		0.486817	0.812292		0.469802	0.798975		0.348131	0.613208			1.05269	1.26872		0.97436	1.19178		1.35409	1.64121		2.13037	1.99345			0.979241	1.07267		1.90919	1.068		1.74993	1.08707		1.74136	1.159
1741 ms	0.435115	0.929815		0.486584	0.812349		0.469609	0.79875		0.347944	0.613017			1.05347	1.26685		0.973791	1.1918		1.35355	1.64103		2.12933	1.99279			0.978949	1.07307		1.90788	1.06829		1.74903	1.08697		1.74064	1.15879
1742 ms	0.434389	0.929972		0.486653	0.812442		0.469157	0.798497		0.347654	0.612866			1.05353	1.26561		0.973043	1.19152		1.3527	1.64072		2.12785	1.99242			0.978622	1.07349		1.90692	1.06866		1.74808	1.08671		1.74002	1.15875
1743 ms	0.434151	0.929715		0.486501	0.81222		0.468978	0.798344		0.347458	0.61292			1.05305	1.26428		0.97234	1.19134		1.35184	1.64054		2.12679	1.99186			0.978551	1.0731		1.90614	1.06876		1.74659	1.08615		1.73966	1.15894
1744 ms	0.433499	0.92982		0.486467	0.811827		0.468763	0.798251		0.347198	0.612807			1.05187	1.26299		0.971951	1.19115		1.35127	1.64026		2.12573	1.99163			0.978235	1.07334		1.90577	1.06859		1.74475	1.08646		1.7389	1.15865
1745 ms	0.432929	0.929594		0.486195	0.811491		0.468597	0.797978		0.346976	0.612636			1.05037	1.26223		0.970928	1.19077		1.35081	1.6404		2.12453	1.99116			0.978098	1.073		1.90494	1.06912		1.74406	1.08655		1.73813	1.15815
1746 ms	0.432256	0.92979		0.485879	0.811347		0.468361	0.797653		0.346774	0.612637			1.0495	1.26104		0.97052	1.19068		1.35008	1.64013		2.12319	1.99062			0.977679	1.07329		1.9037	1.06954		1.74235	1.0867		1.73771	1.15829
1747 ms	0.432145	0.92948		0.485556	0.811156		0.468058	0.797274		0.346523	0.612421			1.04782	1.26026		0.969778	1.19068		1.34955	1.64002		2.12188	1.98994			0.976863	1.07283		1.90323	1.0702		1.74143	1.08648		1.73658	1.15753
1748 ms	0.43168	0.929355		0.485293	0.810845		0.467775	0.797037		0.346276	0.612308			1.04575	1.25985		0.969283	1.19063		1.34834	1.63962		2.12103	1.98924			0.976123	1.07271		1.90255	1.07087		1.74058	1.08638		1.73554	1.15735
1749 ms	0.43192	0.929106		0.48468	0.810627		0.46758	0.796953		0.346121	0.612205			1.04415	1.25885		0.968447	1.19058		1.34761	1.63952		2.12022	1.98871			0.976097	1.07244		1.90161	1.07158		1.73957	1.08629		1.73478	1.15678
1750 ms	0.432182	0.929361		0.484429	0.810253		0.467264	0.796834		0.345871	0.611979			1.04206	1.25779		0.967997	1.19053		1.34682	1.63936		2.11866	1.98841			0.975455	1.07338		1.90028	1.07246		1.73816	1.08675		1.7336	1.15672
[truncated: 700 more rows]

## Sheet: Figure 6a PC-MLI firing rate
Normalized PC-MLI firing rate sorted by CR onset
ISI 250	units in instantaneous firing rate												ISI 500													ISI 700
[truncated: 1,751 more rows]

## Sheet: Figure 6b Eyelid position
Eyelid position sorted by CR amplitude
[truncated: 2,452 more rows]

## Sheet: Figure 6b PC-MLI firing rate
Normalized PC-MLI firing rate sorted by CR amplitude
[truncated: 1,752 more rows]
