# Supplementary material for: Feedback inhibition underlies new computational functions of cerebellar interneurons
Source: eLife. 2022 Dec 8;11:e77603. doi: 10.7554/eLife.77603 (PMC9771357; doi:10.7554/eLife.77603)
Supplement: Figure 9—figure supplement 1—source data 1. — MLI, molecular layer interneuron; PC, Purkinje cell. [file elife-77603-fig9-figsupp1-data1.xlsx]

## Sheet: Figure 7 - supplement 2b
50% max response delay (MLI - PC)
Trial Num	.5 Time PC 250	Full Time PC 250	.5 Time MLI 250	Full Time MLI 250	250 Delay (ms)	Trial Num	.5 Time 500 PC	Full Time PC 500	.5 Time MLI 500	Full Time MLI 500	500 Delay (ms)	.5 Time 750 PC	Full Time 750 PC	.5 Time 750 MLI	Full Time 750 MLI	750 Delay (ms)			nonCR 500	nonCR 750
1	100	170	183	303	83	1	140	150	165	180	25	309	740	388	674	79			-79.2857	-70.4412
2	120	140	202	239	82	2	392	402	270	340	-122	500	760	578	741	78		CR 250	CR 500
3	150	170	171	250	21	3	440	450	270	388	-170	262	760	278	555	16		71.4167	80.1264	60.9865
4	140	150	178	248	38	4	435	475	415	565	-20	666	760	272	378	-394
5	140	150	153	228	13	5	243	255	260	343	17	433	492	297	349	-136
6	100	140	370	370	270	6	375	423	384	431	9	380	460	475	580	95
7	80	140	191	248	111	7	368	385	228	393	-140	265	372	282	356	17
8	160	220	211	268	51	8	407	415	140	197	-267	471	581	432	456	-39
9	140	150	196	196	56	9	465	480	650	764	185	281	392	481	683	200
10	90	160	242	258	152	10	265	375	152	197	-113	272	393	611	675	339
11	150	160	140	159	-10	11	256	275	286	356	30	481	623	507	609	26
12	90	130	132	222	42	12	372	388	625	675	253	491	585	508	574	17
13	150	190	183	199	33	13	395	414	118	168	-277	595	664	559	672	-36
14	70	120	220	272	150	14	466	485	522	535	56	582	644	311	402	-271
15	120	130	188	197	68	15	280	288	252	288	-28	463	642	328	618	-135
16	60	140	182	199	122	16	432	444	151	189	-281	613	760	379	588	-234
17	63	146	192	238	129	17	325	368	235	353	-90	534	602	338	544	-196
18	54	93	163	201	109	18	340	360	321	345	-19	424	496	330	556	-94
19	140	150	141	272	1	19	385	404	112	130	-273	402	760	335	685	-67
20	75	92	192	250	117	20	285	305	102	112	-183	224	325	309	619	85
21	68	108	260	330	192	21	367	375	110	554	-257	671	725	410	800	-261
22	67	128	100	220	33	22	332	360	530	540	198	235	413	305	603	70
23	103	132	189	243	86	23	392	445	522	530	130	323	376	388	651	65
24	122	134	157	253	35	24	310	473	455	532	145	594	685	451	672	-143
25	96	135	208	232	112	25	293	420	512	524	219	613	662	280	369	-333
26	88	122	204	211	116	26	320	331	511	526	191	634	678	318	450	-316
27	72	111	156	250	84	27	284	351	462	481	178	434	664	268	335	-166
28	93	107	182	260	89	28	251	333	482	483	231	155	236	715	820	560
29	73	104	132	233	59	29	233	246	464	487	231	700	760	452	481	-248
30	103	113	239	256	136	30	310	373	448	486	138	554	760	422	650	-132
31	81	113	252	265	171	31	415	425	448	486	33	580	760	495	652	-85
32	83	93	92	210	9	32	329	342	523	540	194	545	760	399	469	-146
33	108	118	240	248	132	33	358	442	481	503	123	572	615	451	568	-121
34	102	112	231	244	129	34	300	442	476	502	176	700	760	211	453	-489
35	108	143	119	202	11	35	261	303	435	508	174	455	585	526	664	71
36	71	111	211	245	140	36	246	353	333	382	87	505	566	452	641	-53
37	75	124	101	138	26	37	374	390	430	465	56	412	522	416	567	4
38	81	113	142	207	61	38	299	305	446	455	147	443	574	396	532	-47
39	98	108	182	244	84	39	235	355	378	433	143	522	588	310	417	-212
40	121	131	95	222	-26	40	388	402	380	435	-8	385	596	407	551	22
41	107	139	228	234	121	41	322	345	405	450	83	515	596	473	613	-42
42	129	139	238	242	109	42	311	353	447	488	136	601	643	621	670	20
43	98	107	205	235	107	43	331	345	431	468	100	582	636	627	668	45
44	88	98	192	212	104	44	330	397	398	466	68	444	591	557	670	113
45	114	124	222	315	108	45	381	432	437	468	56	421	585	621	695	200
46	121	131	196	223	75	46	293	333	360	485	67	398	593	576	745	178
47	138	148	235	245	97	47	332	396	375	486	43	534	673	561	611	27
48	108	117	234	241	126	48	338	413	377	465	39	527	626	554	718	27
49	111	163	167	209	56	49	308	391	360	400	52	546	590	557	621	11
50	78	88	210	213	132	50	352	412	421	474	69	533	602	507	595	-26
51	112	122	89	238	-23	51	341	383	436	482	95	532	653	526	599	-6
52	92	131	87	226	-5	52	347	400	321	373	-26	475	534	595	698	120
53	108	141	167	191	59	53	221	268	348	441	127	502	641	475	708	-27
54	120	130	175	207	55	54	242	269	411	432	169	476	600	507	644	31
55	91	119	241	244	150	55	223	252	415	435	192	477	655	369	402	-108
56	97	129	99	240	2	56	321	415	326	424	5	474	545	491	671	17
57	131	141	205	211	74	57	341	396	344	468	3	505	583	575	612	70
58	83	148	181	190	98	58	293	311	332	448	39	511	565	554	625	43
59	79	129	161	175	82	59	313	325	391	451	78	334	590	574	684	240
60	93	142	245	250	152	60	335	378	392	436	57	473	555	548	593	75
61	122	132	131	231	9	61	321	354	323	482	2	245	581	604	647	359
62	121	131	232	241	111	62	274	294	330	353	56	454	560	602	638	148
63	134	144	195	214	61	63	298	412	372	428	74	451	561	568	655	117
64	131	143	182	231	51	64	368	385	401	444	33	502	614	549	635	47
65	132	142	162	179	30	65	301	398	381	435	80	447	632	543	743	96
66	78	88	101	238	23	66	296	405	422	475	126	422	640	519	573	97
67	81	116	191	197	110	67	368	389	336	411	-32	375	465	537	605	162
68	102	112	171	348	69	68	295	406	411	468	116	433	505	551	602	118
69	102	131	130	163	28	69	323	412	351	463	28	504	586	522	679	18
70	112	122	119	211	7	70	334	388	348	444	14	533	595	511	663	-22
71	111	121	125	156	14	71	338	371	445	509	107	552	760	521	595	-31
72	128	138	111	129	-17	72	313	365	385	485	72	453	564	513	565	60
73	102	112	108	188	6	73	331	405	371	451	40	430	530	573	658	143
74	121	131	89	355	-32	74	328	428	402	493	74	475	562	568	688	93
75	102	112	155	208	53	75	296	342	331	408	35	483	567	564	578	81
76	130	155	120	168	-10	76	362	393	388	455	26	424	630	407	648	-17
77	110	120	158	201	48	77	291	413	398	421	107	407	650	541	613	134
78	71	81	135	181	64	78	288	388	348	428	60	422	635	499	536	77
79	110	120	170	181	60	79	262	333	312	395	50	455	576	477	659	22
80	93	117	94	184	1	80	338	373	389	442	51	457	555	488	608	31
81	117	133	119	228	2	81	271	385	335	438	64	405	512	512	649	107
82	92	105	240	244	148	82	275	450	332	437	57	416	581	407	628	-9
83	108	127	191	217	83	83	365	452	392	532	27	388	565	475	657	87
84	118	128	165	189	47	84	299	422	352	489	53	447	557	410	651	-37
85	68	131	358	455	290	85	352	442	411	484	59	445	524	558	635	113
86	121	151	180	205	59	86	224	413	401	463	177	393	515	498	588	105
87	115	125	231	239	116	87	215	301	359	436	144	345	512	401	615	56
88	98	108	168	175	70	88	306	362	328	416	22	388	503	459	578	71
89	92	131	108	165	16	89	271	383	381	444	110	375	574	523	643	148
90	92	102	238	300	146	90	280	425	318	491	38	368	489	412	543	44
91	91	137	107	160	16	91	305	393	391	485	86	363	481	451	483	88
92	105	115	111	119	6	92	316	388	379	457	63	356	470	439	527	83
93	93	103	191	207	98	93	295	391	385	533	90	355	470	486	619	131
94	102	112	185	223	83	94	251	412	294	385	43	337	450	407	533	70
95	82	92	221	245	139	95	255	347	325	417	70	328	545	416	498	88
96	91	129	152	228	61	96	268	441	372	419	104	352	465	447	539	95
97	148	158	228	235	80	97	274	375	307	452	33	372	551	416	565	44
98	138	148	197	214	59	98	322	383	361	428	39	392	533	399	508	7
99	83	95	212	224	129	99	413	448	399	528	-14	288	477	384	543	96
100	111	121	181	188	70	100	404	437	438	481	34	321	455	376	562	55
101	118	128	195	204	77	101	256	334	263	395	7	303	420	378	511	75
102	121	131	141	152	20	102	296	395	359	467	63	338	437	398	478	60
103	91	101	142	320	51	103	266	417	281	535	15	402	573	429	575	27
104	92	102	89	211	-3	104	255	415	322	368	67	430	481	372	631	-58
105	93	134	92	144	-1	105	281	414	376	468	95	321	455	367	554	46
106	118	128	170	188	52	106	265	443	275	361	10	304	451	368	585	64
107	96	126	143	221	47	107	292	405	308	409	16	257	405	353	448	96
108	88	98	158	175	70	108	251	355	293	418	42	246	353	481	582	235
