# Supplementary material for: Feedback inhibition underlies new computational functions of cerebellar interneurons
Source: eLife. 2022 Dec 8;11:e77603. doi: 10.7554/eLife.77603 (PMC9771357; doi:10.7554/eLife.77603)
Supplement: Figure 10—source data 1. — Full and preCR PC normalized firing rate decrease (∆PC = preCR/full PC activity decrease) and full and preCR MLI normalized firing increase (∆MLI = preCR/full MLI activity increase) were measured to access the timing of PC and PC-MLI activity changes in recorded pairs (∆PC-∆MLI; see Figure 9—figure supplement 2b). MLI, molecular layer interneuron; PC, Purkinje cell. [file elife-77603-fig10-data1.xlsx]

## Sheet: Figure 8b
∆PC-∆MLI Distribution	-1	-0.92	-0.84	-0.76	-0.68	-0.6	-0.52	-0.44	-0.36	-0.28	-0.2	-0.12	-0.04	0.04	0.12	0.2	0.28	0.36	0.44	0.52	0.6	0.68	0.76	0.84	0.92	1
∆PC-∆MLI ISI 250	0	0	0	0	0	1	0	1	1	4	4	1	8	9	15	8	2	3	7	3	3	3	1	2	0	0
∆PC-∆MLI ISI 500	0	0	0	0	0	0	2	0	1	3	0	0	3	9	7	8	5	5	1	2	2	1	1	0	0	0
∆PC-∆MLI ISI 700, 750	0	0	0	0	0	1	0	0	0	0	0	0	3	1	1	0	1	1	1	1	0	0	0	0	0	0
∆PC = preCR PC/full PC normalized firng rate
∆MLI = preCR MLI/full MLI normalized firing rate
see Figure 7- supplement 2d for definition
Normalized firing rate
ISI 250 full PC decrease	1.18117	1.09503	0.828674	0.28723	0.760825	0.735009	0.799286	0.815277	0.43844	0.692265	0.24918	0.689592	0.114645	0.770087	0.757667	0.707141	0.947742	0.790909	0.772627	0.707141	0.947742	0.790909	0.772627	0.707141	0.947742	0.790909	0.772627	0.814136	0.831512	0.494951	0.932766	0.805546	0.814136	0.831512	0.494951	0.932766	0.805546	0.814136	0.831512	0.494951	0.932766	0.805546	0.795457	0.661833	0.890041	0.926387	0.799053	0.305552	0.859132
ISI 250 preCR PC decrease	1.12619	1.18853	0.5346	0.37948	0.23299	0.319355	0.319931	0.854512	0.020659	0.174682	0.215983	0.162886	0.228794	0.288032	0.674517	0.00193813	0.625218	0.246027	0.307132	0.00193813	0.625218	0.246027	0.307132	0.00193813	0.625218	0.246027	0.307132	0.136189	0.729216	0.097204	0.519255	0.844085	0.136189	0.729216	0.097204	0.519255	0.844085	0.136189	0.729216	0.097204	0.519255	0.844085	0.386219	0.206034	1.02701	0.765085	0.475915	0	0.604335
ISI 500 full PC decrease	0.712706	0.809163	0.305352	0.562978	0.274002	0.727695	0.576284	0.224156	0.268743	0.764626	0.797166	0.696821	0.864712	0.491968	0.869199	0.78943	0.78943	0.669344	0.855082	0.745115	0.830141	0.74942	0.923348	0.878765	0.55736	0.645669	0.645669	0.453562	0.453562	0.910588	0.830816	0.899604	0.910588	0.830816	0.899604	0.718307	0.811366	0.560305	0.592823	0.624884	0.671457	0.744859	0.553052	0.649925	0.382082	0.388685	0.863822	0.2598	0.759742
ISI 500 preCR PC decrease	0.307741	0.545568	0.248988	0.315775	0.139447	0.298866	0.240434	0.187665	0.26963	0.357534	0.458911	0.373241	0.482165	0.106933	0.755895	0.264289	0.264289	0.15105	0.528675	0.194913	0.402862	0.418583	0.64391	0.345221	0.212101	0.288009	0.288009	0.230103	0.230103	0.825039	0.678871	1.15539	0.825039	0.678871	1.15539	0.489698	0.660531	0.203056	0.210748	0.197676	0.604724	0.329485	0.181773	0.160414	0.0309327	0.0263794	0.350309	0	0.234546
ISI 700 full PC decrease	0.364034	0.875391	0.650271	0.364034	0.875391	0.650271	0.398502	0.533105	0.725217	0.608866
ISI 700 preCR PC decrease	0.082251	0.250965	0.544193	0.082251	0.250965	0.544193	0.213489	0.241069	0.38303	0.517013
ISI 250 full MLI increase	2.93349	2.93349	2.41565	2.41565	11.8816	11.8816	11.8816	11.8816	11.8816	11.8816	11.8816	11.8816	30.2953	30.2953	30.2953	4.08292	4.08292	4.08292	4.08292	9.23772	9.23772	9.23772	9.23772	3.31354	3.31354	3.31354	3.31354	5.43725	5.43725	5.43725	5.43725	5.43725	4.26065	4.26065	4.26065	4.26065	4.26065	3.50017	3.50017	3.50017	3.50017	3.50017	4.45136	4.45136	4.45136	4.45136	4.45136	4.45136	4.45136
ISI 250 preCR MLI increase	1.39708	1.39708	1.41537	1.41537	2.62475	2.62475	2.62475	2.62475	2.62475	2.62475	2.62475	2.62475	8.88437	8.88437	8.88437	1.28881	1.28881	1.28881	1.28881	2.16767	2.16767	2.16767	2.16767	1.29772	1.29772	1.29772	1.29772	3.1593	3.1593	3.1593	3.1593	3.1593	1.3672	1.3672	1.3672	1.3672	1.3672	1.97132	1.97132	1.97132	1.97132	1.97132	2.21303	2.21303	2.21303	2.21303	2.21303	2.21303	2.21303
ISI 500 full MLI increase	6.33547	6.33547	6.33547	1.7179	1.7179	1.7179	1.7179	1.7179	1.7179	3.17741	3.17741	3.17741	3.17741	3.17741	3.01273	2.13625	2.77714	3.75853	3.75853	3.75853	3.75853	3.75853	2.6441	2.6441	2.34827	2.19651	15.4279	6.67154	2.44858	2.96276	2.96276	2.96276	24.5176	24.5176	24.5176	2.9692	2.9692	2.9692	2.9692	2.24191	2.24191	2.24191	2.24191	2.24191	9.77604	8.2044	9.60217	9.60217	4.94588
ISI 500 preCR MLI increase	2.58824	2.58824	2.58824	1.15005	1.15005	1.15005	1.15005	1.15005	1.15005	1.58379	1.58379	1.58379	1.58379	1.58379	1.17175	1.56571	1.24286	1.26285	1.26285	1.26285	1.26285	1.26285	1.18549	1.18549	1.18511	1.51123	5.429	4.81195	1.72446	2.42832	2.42832	2.42832	10.7835	10.7835	10.7835	1.32217	1.32217	1.32217	1.32217	1.3308	1.3308	1.3308	1.3308	1.3308	6.37446	4.1338	5.60033	5.60033	4.18888
ISI 700 full MLI increase	4.859	4.859	4.859	2.75063	2.75063	2.75063	6.3527	6.3527	6.3527	6.3527
ISI 700 preCR MLI increase	3.66481	3.66481	3.66481	1.32986	1.32986	1.32986	3.38508	3.38508	3.38508	3.38508
[truncated: 27 more columns]
